# Supplementary material for: Machine learning assisted binary alloy catalyst design for the electroreduction of CO2 to C2 products
Source: Royal Society of Chemistry journal article supplement (doi:10.1039/d2ya00316c), 2023-01-01
Supplement: d2ya00316c1.pdf [file d2ya00316c1.pdf]

**Database of Structures for  
Machine Learning Assisted Binary Alloy Catalyst Design for the  
Electroreduction of CO<sub>2</sub> to C<sub>2</sub> Products**

Below is a link to a google drive folder containing an ASE db file which can be interfaced  
similar to a SQL database with keys for Eads:

<https://drive.google.com/drive/folders/1IZjAxPb45kGZhnILfqlBNDMPFCli-e3A?usp=sharing>
