# Supplementary material for: Machine learning assisted binary alloy catalyst design for the electroreduction of CO2 to C2 products
Source: Royal Society of Chemistry journal article supplement (doi:10.1039/d2ya00316c), 2023-01-01
Supplement: d2ya00316c2.csv [file d2ya00316c2.csv]

	group_1	period_1	EN_1	Nied_1	group_2	period_2	EN_2	Nied_2	group_3	period_3	EN_3	Nied_3	group_4	period_4	EN_4	Nied_4	group_5	period_5	EN_5	Nied_5	group_6	period_6	EN_6	Nied_6	group_7	period_7	EN_7	Nied_7	group_8	period_8	EN_8	Nied_8	group_9	period_9	EN_9	Nied_9	group_10	period_10	EN_10	Nied_10	group_11	period_11	EN_11	Nied_11	group_12	period_12	EN_12	Nied_12	group_13
0	4.0	11.0	1.9	0.0	4.0	11.0	1.9	0.0	5.0	8.0	2.2	3.0	4.0	11.0	1.9	0.0	4.0	11.0	1.9	0.0	4.0	11.0	1.9	0.0	4.0	11.0	1.9	0.0	4.0	11.0	1.9	0.0	4.0	11.0	1.9	0.0	4.0	11.0	1.9	0.0	4.0	11.0	1.9	0.0	4.0	11.0	1.9	0.0	4.0
1	4.0	11.0	1.9	0.0	5.0	8.0	2.2	3.0	4.0	11.0	1.9	0.0	4.0	11.0	1.9	0.0	5.0	8.0	2.2	3.0	4.0	11.0	1.9	0.0	4.0	11.0	1.9	0.0	4.0	11.0	1.9	0.0	4.0	11.0	1.9	0.0	5.0	8.0	2.2	3.0	4.0	11.0	1.9	0.0	4.0	11.0	1.9	0.0	4.0
2	4.0	11.0	1.9	0.0	5.0	8.0	2.2	3.0	5.0	8.0	2.2	3.0	4.0	11.0	1.9	0.0	4.0	11.0	1.9	0.0	5.0	8.0	2.2	3.0	4.0	11.0	1.9	0.0	4.0	11.0	1.9	0.0	4.0	11.0	1.9	0.0	4.0	11.0	1.9	0.0	4.0	11.0	1.9	0.0	4.0	11.0	1.9	0.0	5.0
3	5.0	8.0	2.2	3.0	4.0	11.0	1.9	0.0	4.0	11.0	1.9	0.0	4.0	11.0	1.9	0.0	5.0	8.0	2.2	3.0	4.0	11.0	1.9	0.0	4.0	11.0	1.9	0.0	5.0	8.0	2.2	3.0	4.0	11.0	1.9	0.0	5.0	8.0	2.2	3.0	4.0	11.0	1.9	0.0	4.0	11.0	1.9	0.0	4.0
4	4.0	11.0	1.9	0.0	5.0	8.0	2.2	3.0	4.0	11.0	1.9	0.0	4.0	11.0	1.9	0.0	4.0	11.0	1.9	0.0	5.0	8.0	2.2	3.0	4.0	11.0	1.9	0.0	4.0	11.0	1.9	0.0	4.0	11.0	1.9	0.0	4.0	11.0	1.9	0.0	5.0	8.0	2.2	3.0	5.0	8.0	2.2	3.0	4.0
5	4.0	11.0	1.9	0.0	4.0	11.0	1.9	0.0	4.0	11.0	1.9	0.0	5.0	8.0	2.2	3.0	4.0	11.0	1.9	0.0	4.0	11.0	1.9	0.0	4.0	11.0	1.9	0.0	4.0	11.0	1.9	0.0	4.0	11.0	1.9	0.0	4.0	11.0	1.9	0.0	4.0	11.0	1.9	0.0	4.0	11.0	1.9	0.0	4.0
6	4.0	11.0	1.9	0.0	5.0	8.0	2.2	3.0	4.0	11.0	1.9	0.0	4.0	11.0	1.9	0.0	4.0	11.0	1.9	0.0	4.0	11.0	1.9	0.0	4.0	11.0	1.9	0.0	4.0	11.0	1.9	0.0	4.0	11.0	1.9	0.0	4.0	11.0	1.9	0.0	4.0	11.0	1.9	0.0	4.0	11.0	1.9	0.0	4.0
7	4.0	11.0	1.9	0.0	5.0	8.0	2.2	3.0	4.0	11.0	1.9	0.0	4.0	11.0	1.9	0.0	4.0	11.0	1.9	0.0	5.0	8.0	2.2	3.0	4.0	11.0	1.9	0.0	4.0	11.0	1.9	0.0	4.0	11.0	1.9	0.0	4.0	11.0	1.9	0.0	4.0	11.0	1.9	0.0	4.0	11.0	1.9	0.0	4.0
8	4.0	11.0	1.9	0.0	5.0	8.0	2.2	3.0	5.0	8.0	2.2	3.0	4.0	11.0	1.9	0.0	4.0	11.0	1.9	0.0	4.0	11.0	1.9	0.0	5.0	8.0	2.2	3.0	4.0	11.0	1.9	0.0	4.0	11.0	1.9	0.0	4.0	11.0	1.9	0.0	4.0	11.0	1.9	0.0	4.0	11.0	1.9	0.0	4.0
9	4.0	11.0	1.9	0.0	4.0	11.0	1.9	0.0	4.0	11.0	1.9	0.0	4.0	11.0	1.9	0.0	4.0	11.0	1.9	0.0	4.0	11.0	1.9	0.0	4.0	11.0	1.9	0.0	4.0	11.0	1.9	0.0	4.0	11.0	1.9	0.0	4.0	11.0	1.9	0.0	5.0	8.0	2.2	3.0	4.0	11.0	1.9	0.0	5.0
10	4.0	11.0	1.9	0.0	4.0	11.0	1.9	0.0	5.0	8.0	2.2	3.0	4.0	11.0	1.9	0.0	5.0	8.0	2.2	3.0	5.0	8.0	2.2	3.0	4.0	11.0	1.9	0.0	5.0	8.0	2.2	3.0	5.0	8.0	2.2	3.0	4.0	11.0	1.9	0.0	5.0	8.0	2.2	3.0	5.0	8.0	2.2	3.0	4.0
11	4.0	11.0	1.9	0.0	4.0	11.0	1.9	0.0	4.0	11.0	1.9	0.0	4.0	11.0	1.9	0.0	4.0	11.0	1.9	0.0	4.0	11.0	1.9	0.0	4.0	11.0	1.9	0.0	4.0	11.0	1.9	0.0	4.0	11.0	1.9	0.0	5.0	8.0	2.2	3.0	4.0	11.0	1.9	0.0	4.0	11.0	1.9	0.0	5.0
12	5.0	8.0	2.2	3.0	4.0	11.0	1.9	0.0	4.0	11.0	1.9	0.0	4.0	11.0	1.9	0.0	4.0	11.0	1.9	0.0	4.0	11.0	1.9	0.0	5.0	8.0	2.2	3.0	4.0	11.0	1.9	0.0	5.0	8.0	2.2	3.0	5.0	8.0	2.2	3.0	4.0	11.0	1.9	0.0	4.0	11.0	1.9	0.0	4.0
13	4.0	11.0	1.9	0.0	4.0	11.0	1.9	0.0	5.0	8.0	2.2	3.0	4.0	11.0	1.9	0.0	4.0	11.0	1.9	0.0	4.0	11.0	1.9	0.0	5.0	8.0	2.2	3.0	5.0	8.0	2.2	3.0	4.0	11.0	1.9	0.0	5.0	8.0	2.2	3.0	4.0	11.0	1.9	0.0	4.0	11.0	1.9	0.0	5.0
14	4.0	11.0	1.9	0.0	5.0	8.0	2.2	3.0	4.0	11.0	1.9	0.0	4.0	11.0	1.9	0.0	5.0	8.0	2.2	3.0	4.0	11.0	1.9	0.0	4.0	11.0	1.9	0.0	4.0	11.0	1.9	0.0	4.0	11.0	1.9	0.0	4.0	11.0	1.9	0.0	4.0	11.0	1.9	0.0	4.0	11.0	1.9	0.0	4.0
15	4.0	11.0	1.9	0.0	4.0	11.0	1.9	0.0	4.0	11.0	1.9	0.0	5.0	8.0	2.2	3.0	4.0	11.0	1.9	0.0	4.0	11.0	1.9	0.0	4.0	11.0	1.9	0.0	4.0	11.0	1.9	0.0	5.0	8.0	2.2	3.0	5.0	8.0	2.2	3.0	4.0	11.0	1.9	0.0	4.0	11.0	1.9	0.0	4.0
16	4.0	11.0	1.9	0.0	4.0	11.0	1.9	0.0	5.0	8.0	2.2	3.0	4.0	11.0	1.9	0.0	4.0	11.0	1.9	0.0	4.0	11.0	1.9	0.0	4.0	11.0	1.9	0.0	4.0	11.0	1.9	0.0	4.0	11.0	1.9	0.0	4.0	11.0	1.9	0.0	5.0	8.0	2.2	3.0	5.0	8.0	2.2	3.0	4.0
17	4.0	11.0	1.9	0.0	4.0	11.0	1.9	0.0	5.0	8.0	2.2	3.0	4.0	11.0	1.9	0.0	4.0	11.0	1.9	0.0	4.0	11.0	1.9	0.0	4.0	11.0	1.9	0.0	4.0	11.0	1.9	0.0	4.0	11.0	1.9	0.0	4.0	11.0	1.9	0.0	4.0	11.0	1.9	0.0	5.0	8.0	2.2	3.0	4.0
18	4.0	11.0	1.9	0.0	5.0	8.0	2.2	3.0	4.0	11.0	1.9	0.0	4.0	11.0	1.9	0.0	4.0	11.0	1.9	0.0	4.0	11.0	1.9	0.0	5.0	8.0	2.2	3.0	4.0	11.0	1.9	0.0	4.0	11.0	1.9	0.0	4.0	11.0	1.9	0.0	4.0	11.0	1.9	0.0	4.0	11.0	1.9	0.0	5.0
19	5.0	8.0	2.2	3.0	4.0	11.0	1.9	0.0	5.0	8.0	2.2	3.0	4.0	11.0	1.9	0.0	4.0	11.0	1.9	0.0	4.0	11.0	1.9	0.0	4.0	11.0	1.9	0.0	4.0	11.0	1.9	0.0	4.0	11.0	1.9	0.0	5.0	8.0	2.2	3.0	4.0	11.0	1.9	0.0	4.0	11.0	1.9	0.0	4.0
20	4.0	11.0	1.9	0.0	4.0	11.0	1.9	0.0	4.0	11.0	1.9	0.0	4.0	11.0	1.9	0.0	4.0	11.0	1.9	0.0	4.0	11.0	1.9	0.0	4.0	11.0	1.9	0.0	4.0	11.0	1.9	0.0	5.0	8.0	2.2	3.0	4.0	11.0	1.9	0.0	4.0	11.0	1.9	0.0	4.0	11.0	1.9	0.0	4.0
21	5.0	8.0	2.2	3.0	4.0	11.0	1.9	0.0	4.0	11.0	1.9	0.0	4.0	11.0	1.9	0.0	5.0	8.0	2.2	3.0	4.0	11.0	1.9	0.0	5.0	8.0	2.2	3.0	4.0	11.0	1.9	0.0	4.0	11.0	1.9	0.0	4.0	11.0	1.9	0.0	5.0	8.0	2.2	3.0	5.0	8.0	2.2	3.0	5.0
22	5.0	8.0	2.2	3.0	4.0	11.0	1.9	0.0	4.0	11.0	1.9	0.0	4.0	11.0	1.9	0.0	5.0	8.0	2.2	3.0	4.0	11.0	1.9	0.0	4.0	11.0	1.9	0.0	4.0	11.0	1.9	0.0	4.0	11.0	1.9	0.0	5.0	8.0	2.2	3.0	4.0	11.0	1.9	0.0	5.0	8.0	2.2	3.0	5.0
23	4.0	11.0	1.9	0.0	4.0	11.0	1.9	0.0	4.0	11.0	1.9	0.0	4.0	11.0	1.9	0.0	5.0	8.0	2.2	3.0	4.0	11.0	1.9	0.0	4.0	11.0	1.9	0.0	4.0	11.0	1.9	0.0	4.0	11.0	1.9	0.0	4.0	11.0	1.9	0.0	4.0	11.0	1.9	0.0	4.0	11.0	1.9	0.0	4.0
24	4.0	11.0	1.9	0.0	4.0	11.0	1.9	0.0	4.0	11.0	1.9	0.0	4.0	11.0	1.9	0.0	4.0	11.0	1.9	0.0	4.0	11.0	1.9	0.0	4.0	11.0	1.9	0.0	4.0	11.0	1.9	0.0	4.0	11.0	1.9	0.0	5.0	8.0	2.2	3.0	4.0	11.0	1.9	0.0	5.0	8.0	2.2	3.0	4.0
25	4.0	11.0	1.9	0.0	4.0	11.0	1.9	0.0	4.0	11.0	1.9	0.0	4.0	11.0	1.9	0.0	4.0	11.0	1.9	0.0	4.0	11.0	1.9	0.0	4.0	11.0	1.9	0.0	5.0	8.0	2.2	3.0	4.0	11.0	1.9	0.0	4.0	11.0	1.9	0.0	4.0	11.0	1.9	0.0	4.0	11.0	1.9	0.0	4.0
26	4.0	11.0	1.9	0.0	4.0	11.0	1.9	0.0	4.0	11.0	1.9	0.0	4.0	11.0	1.9	0.0	4.0	11.0	1.9	0.0	5.0	8.0	2.2	3.0	4.0	11.0	1.9	0.0	4.0	11.0	1.9	0.0	4.0	11.0	1.9	0.0	5.0	8.0	2.2	3.0	4.0	11.0	1.9	0.0	4.0	11.0	1.9	0.0	4.0
27	4.0	11.0	1.9	0.0	4.0	11.0	1.9	0.0	4.0	11.0	1.9	0.0	4.0	11.0	1.9	0.0	5.0	8.0	2.2	3.0	4.0	11.0	1.9	0.0	5.0	8.0	2.2	3.0	4.0	11.0	1.9	0.0	4.0	11.0	1.9	0.0	4.0	11.0	1.9	0.0	4.0	11.0	1.9	0.0	4.0	11.0	1.9	0.0	4.0
28	4.0	11.0	1.9	0.0	4.0	11.0	1.9	0.0	4.0	11.0	1.9	0.0	4.0	11.0	1.9	0.0	4.0	11.0	1.9	0.0	4.0	11.0	1.9	0.0	4.0	11.0	1.9	0.0	4.0	11.0	1.9	0.0	4.0	11.0	1.9	0.0	5.0	8.0	2.2	3.0	5.0	8.0	2.2	3.0	5.0	8.0	2.2	3.0	4.0
29	4.0	11.0	1.9	0.0	4.0	11.0	1.9	0.0	4.0	11.0	1.9	0.0	4.0	11.0	1.9	0.0	4.0	11.0	1.9	0.0	4.0	11.0	1.9	0.0	4.0	11.0	1.9	0.0	5.0	8.0	2.2	3.0	4.0	11.0	1.9	0.0	4.0	11.0	1.9	0.0	4.0	11.0	1.9	0.0	5.0	8.0	2.2	3.0	4.0
30	5.0	8.0	2.2	3.0	4.0	11.0	1.9	0.0	4.0	11.0	1.9	0.0	4.0	11.0	1.9	0.0	4.0	11.0	1.9	0.0	5.0	8.0	2.2	3.0	4.0	11.0	1.9	0.0	5.0	8.0	2.2	3.0	5.0	8.0	2.2	3.0	4.0	11.0	1.9	0.0	4.0	11.0	1.9	0.0	4.0	11.0	1.9	0.0	4.0
31	4.0	11.0	1.9	0.0	4.0	11.0	1.9	0.0	4.0	11.0	1.9	0.0	5.0	8.0	2.2	3.0	5.0	8.0	2.2	3.0	4.0	11.0	1.9	0.0	4.0	11.0	1.9	0.0	4.0	11.0	1.9	0.0	4.0	11.0	1.9	0.0	4.0	11.0	1.9	0.0	4.0	11.0	1.9	0.0	4.0	11.0	1.9	0.0	4.0
32	5.0	8.0	2.2	3.0	4.0	11.0	1.9	0.0	4.0	11.0	1.9	0.0	5.0	8.0	2.2	3.0	4.0	11.0	1.9	0.0	4.0	11.0	1.9	0.0	4.0	11.0	1.9	0.0	4.0	11.0	1.9	0.0	4.0	11.0	1.9	0.0	5.0	8.0	2.2	3.0	4.0	11.0	1.9	0.0	4.0	11.0	1.9	0.0	5.0
33	4.0	11.0	1.9	0.0	4.0	11.0	1.9	0.0	4.0	11.0	1.9	0.0	4.0	11.0	1.9	0.0	5.0	8.0	2.2	3.0	4.0	11.0	1.9	0.0	5.0	8.0	2.2	3.0	4.0	11.0	1.9	0.0	5.0	8.0	2.2	3.0	4.0	11.0	1.9	0.0	4.0	11.0	1.9	0.0	4.0	11.0	1.9	0.0	4.0
34	4.0	11.0	1.9	0.0	4.0	11.0	1.9	0.0	4.0	11.0	1.9	0.0	4.0	11.0	1.9	0.0	5.0	8.0	2.2	3.0	5.0	8.0	2.2	3.0	4.0	11.0	1.9	0.0	4.0	11.0	1.9	0.0	4.0	11.0	1.9	0.0	4.0	11.0	1.9	0.0	4.0	11.0	1.9	0.0	4.0	11.0	1.9	0.0	4.0
35	5.0	8.0	2.2	3.0	4.0	11.0	1.9	0.0	4.0	11.0	1.9	0.0	5.0	8.0	2.2	3.0	4.0	11.0	1.9	0.0	4.0	11.0	1.9	0.0	5.0	8.0	2.2	3.0	4.0	11.0	1.9	0.0	4.0	11.0	1.9	0.0	4.0	11.0	1.9	0.0	4.0	11.0	1.9	0.0	5.0	8.0	2.2	3.0	4.0
36	5.0	8.0	2.2	3.0	4.0	11.0	1.9	0.0	4.0	11.0	1.9	0.0	4.0	11.0	1.9	0.0	4.0	11.0	1.9	0.0	4.0	11.0	1.9	0.0	4.0	11.0	1.9	0.0	4.0	11.0	1.9	0.0	4.0	11.0	1.9	0.0	4.0	11.0	1.9	0.0	4.0	11.0	1.9	0.0	4.0	11.0	1.9	0.0	4.0
37	5.0	8.0	2.2	3.0	5.0	8.0	2.2	3.0	4.0	11.0	1.9	0.0	4.0	11.0	1.9	0.0	4.0	11.0	1.9	0.0	4.0	11.0	1.9	0.0	4.0	11.0	1.9	0.0	5.0	8.0	2.2	3.0	4.0	11.0	1.9	0.0	4.0	11.0	1.9	0.0	4.0	11.0	1.9	0.0	4.0	11.0	1.9	0.0	4.0
38	4.0	11.0	1.9	0.0	5.0	8.0	2.2	3.0	4.0	11.0	1.9	0.0	4.0	11.0	1.9	0.0	4.0	11.0	1.9	0.0	4.0	11.0	1.9	0.0	4.0	11.0	1.9	0.0	4.0	11.0	1.9	0.0	4.0	11.0	1.9	0.0	4.0	11.0	1.9	0.0	4.0	11.0	1.9	0.0	5.0	8.0	2.2	3.0	4.0
39	4.0	11.0	1.9	0.0	5.0	8.0	2.2	3.0	4.0	11.0	1.9	0.0	4.0	11.0	1.9	0.0	5.0	8.0	2.2	3.0	4.0	11.0	1.9	0.0	4.0	11.0	1.9	0.0	4.0	11.0	1.9	0.0	4.0	11.0	1.9	0.0	4.0	11.0	1.9	0.0	5.0	8.0	2.2	3.0	4.0	11.0	1.9	0.0	4.0
40	5.0	8.0	2.2	3.0	5.0	8.0	2.2	3.0	4.0	11.0	1.9	0.0	4.0	11.0	1.9	0.0	4.0	11.0	1.9	0.0	4.0	11.0	1.9	0.0	4.0	11.0	1.9	0.0	4.0	11.0	1.9	0.0	4.0	11.0	1.9	0.0	4.0	11.0	1.9	0.0	4.0	11.0	1.9	0.0	5.0	8.0	2.2	3.0	5.0
41	4.0	11.0	1.9	0.0	4.0	11.0	1.9	0.0	4.0	11.0	1.9	0.0	4.0	11.0	1.9	0.0	4.0	11.0	1.9	0.0	4.0	11.0	1.9	0.0	5.0	8.0	2.2	3.0	4.0	11.0	1.9	0.0	4.0	11.0	1.9	0.0	4.0	11.0	1.9	0.0	4.0	11.0	1.9	0.0	5.0	8.0	2.2	3.0	5.0
42	5.0	8.0	2.2	3.0	4.0	11.0	1.9	0.0	4.0	11.0	1.9	0.0	5.0	8.0	2.2	3.0	4.0	11.0	1.9	0.0	4.0	11.0	1.9	0.0	4.0	11.0	1.9	0.0	4.0	11.0	1.9	0.0	4.0	11.0	1.9	0.0	5.0	8.0	2.2	3.0	4.0	11.0	1.9	0.0	4.0	11.0	1.9	0.0	4.0
43	4.0	11.0	1.9	0.0	4.0	11.0	1.9	0.0	5.0	8.0	2.2	3.0	4.0	11.0	1.9	0.0	4.0	11.0	1.9	0.0	4.0	11.0	1.9	0.0	5.0	8.0	2.2	3.0	4.0	11.0	1.9	0.0	4.0	11.0	1.9	0.0	4.0	11.0	1.9	0.0	4.0	11.0	1.9	0.0	4.0	11.0	1.9	0.0	4.0
44	4.0	11.0	1.9	0.0	5.0	8.0	2.2	3.0	4.0	11.0	1.9	0.0	4.0	11.0	1.9	0.0	5.0	8.0	2.2	3.0	5.0	8.0	2.2	3.0	4.0	11.0	1.9	0.0	4.0	11.0	1.9	0.0	4.0	11.0	1.9	0.0	4.0	11.0	1.9	0.0	5.0	8.0	2.2	3.0	4.0	11.0	1.9	0.0	5.0
45	4.0	11.0	1.9	0.0	4.0	11.0	1.9	0.0	5.0	8.0	2.2	3.0	5.0	8.0	2.2	3.0	4.0	11.0	1.9	0.0	5.0	8.0	2.2	3.0	4.0	11.0	1.9	0.0	4.0	11.0	1.9	0.0	4.0	11.0	1.9	0.0	4.0	11.0	1.9	0.0	4.0	11.0	1.9	0.0	4.0	11.0	1.9	0.0	4.0
46	4.0	11.0	1.9	0.0	5.0	8.0	2.2	3.0	5.0	8.0	2.2	3.0	5.0	8.0	2.2	3.0	5.0	8.0	2.2	3.0	4.0	11.0	1.9	0.0	4.0	11.0	1.9	0.0	5.0	8.0	2.2	3.0	4.0	11.0	1.9	0.0	4.0	11.0	1.9	0.0	4.0	11.0	1.9	0.0	4.0	11.0	1.9	0.0	4.0
47	4.0	11.0	1.9	0.0	4.0	11.0	1.9	0.0	4.0	11.0	1.9	0.0	5.0	8.0	2.2	3.0	4.0	11.0	1.9	0.0	4.0	11.0	1.9	0.0	5.0	8.0	2.2	3.0	4.0	11.0	1.9	0.0	5.0	8.0	2.2	3.0	4.0	11.0	1.9	0.0	4.0	11.0	1.9	0.0	4.0	11.0	1.9	0.0	4.0
48	5.0	8.0	2.2	3.0	4.0	11.0	1.9	0.0	4.0	11.0	1.9	0.0	4.0	11.0	1.9	0.0	4.0	11.0	1.9	0.0	4.0	11.0	1.9	0.0	4.0	11.0	1.9	0.0	4.0	11.0	1.9	0.0	5.0	8.0	2.2	3.0	4.0	11.0	1.9	0.0	4.0	11.0	1.9	0.0	5.0	8.0	2.2	3.0	4.0
49	5.0	8.0	2.2	3.0	4.0	11.0	1.9	0.0	4.0	11.0	1.9	0.0	4.0	11.0	1.9	0.0	5.0	8.0	2.2	3.0	4.0	11.0	1.9	0.0	4.0	11.0	1.9	0.0	4.0	11.0	1.9	0.0	5.0	8.0	2.2	3.0	4.0	11.0	1.9	0.0	4.0	11.0	1.9	0.0	4.0	11.0	1.9	0.0	4.0
50	4.0	11.0	1.9	0.0	5.0	8.0	2.2	3.0	4.0	11.0	1.9	0.0	4.0	11.0	1.9	0.0	4.0	11.0	1.9	0.0	4.0	11.0	1.9	0.0	5.0	8.0	2.2	3.0	4.0	11.0	1.9	0.0	4.0	11.0	1.9	0.0	4.0	11.0	1.9	0.0	5.0	8.0	2.2	3.0	4.0	11.0	1.9	0.0	4.0
51	4.0	11.0	1.9	0.0	4.0	11.0	1.9	0.0	4.0	11.0	1.9	0.0	5.0	8.0	2.2	3.0	4.0	11.0	1.9	0.0	5.0	8.0	2.2	3.0	4.0	11.0	1.9	0.0	4.0	11.0	1.9	0.0	4.0	11.0	1.9	0.0	5.0	8.0	2.2	3.0	4.0	11.0	1.9	0.0	5.0	8.0	2.2	3.0	4.0
52	4.0	11.0	1.9	0.0	5.0	8.0	2.2	3.0	4.0	11.0	1.9	0.0	4.0	11.0	1.9	0.0	4.0	11.0	1.9	0.0	5.0	8.0	2.2	3.0	5.0	8.0	2.2	3.0	4.0	11.0	1.9	0.0	4.0	11.0	1.9	0.0	4.0	11.0	1.9	0.0	4.0	11.0	1.9	0.0	4.0	11.0	1.9	0.0	4.0
53	4.0	11.0	1.9	0.0	4.0	11.0	1.9	0.0	4.0	11.0	1.9	0.0	4.0	11.0	1.9	0.0	5.0	8.0	2.2	3.0	4.0	11.0	1.9	0.0	4.0	11.0	1.9	0.0	5.0	8.0	2.2	3.0	4.0	11.0	1.9	0.0	4.0	11.0	1.9	0.0	4.0	11.0	1.9	0.0	4.0	11.0	1.9	0.0	4.0
54	5.0	8.0	2.2	3.0	4.0	11.0	1.9	0.0	4.0	11.0	1.9	0.0	4.0	11.0	1.9	0.0	4.0	11.0	1.9	0.0	5.0	8.0	2.2	3.0	4.0	11.0	1.9	0.0	4.0	11.0	1.9	0.0	4.0	11.0	1.9	0.0	5.0	8.0	2.2	3.0	4.0	11.0	1.9	0.0	4.0	11.0	1.9	0.0	4.0
55	4.0	11.0	1.9	0.0	4.0	11.0	1.9	0.0	5.0	8.0	2.2	3.0	5.0	8.0	2.2	3.0	4.0	11.0	1.9	0.0	4.0	11.0	1.9	0.0	4.0	11.0	1.9	0.0	4.0	11.0	1.9	0.0	4.0	11.0	1.9	0.0	4.0	11.0	1.9	0.0	4.0	11.0	1.9	0.0	4.0	11.0	1.9	0.0	4.0
56	4.0	11.0	1.9	0.0	5.0	8.0	2.2	3.0	4.0	11.0	1.9	0.0	5.0	8.0	2.2	3.0	4.0	11.0	1.9	0.0	4.0	11.0	1.9	0.0	5.0	8.0	2.2	3.0	5.0	8.0	2.2	3.0	4.0	11.0	1.9	0.0	4.0	11.0	1.9	0.0	4.0	11.0	1.9	0.0	5.0	8.0	2.2	3.0	4.0
57	4.0	11.0	1.9	0.0	4.0	11.0	1.9	0.0	4.0	11.0	1.9	0.0	4.0	11.0	1.9	0.0	5.0	8.0	2.2	3.0	4.0	11.0	1.9	0.0	5.0	8.0	2.2	3.0	4.0	11.0	1.9	0.0	4.0	11.0	1.9	0.0	5.0	8.0	2.2	3.0	4.0	11.0	1.9	0.0	5.0	8.0	2.2	3.0	4.0
58	4.0	11.0	1.9	0.0	4.0	11.0	1.9	0.0	4.0	11.0	1.9	0.0	4.0	11.0	1.9	0.0	4.0	11.0	1.9	0.0	4.0	11.0	1.9	0.0	4.0	11.0	1.9	0.0	4.0	11.0	1.9	0.0	4.0	11.0	1.9	0.0	5.0	8.0	2.2	3.0	5.0	8.0	2.2	3.0	4.0	11.0	1.9	0.0	4.0
59	5.0	8.0	2.2	3.0	4.0	11.0	1.9	0.0	4.0	11.0	1.9	0.0	4.0	11.0	1.9	0.0	4.0	11.0	1.9	0.0	5.0	8.0	2.2	3.0	4.0	11.0	1.9	0.0	5.0	8.0	2.2	3.0	4.0	11.0	1.9	0.0	5.0	8.0	2.2	3.0	5.0	8.0	2.2	3.0	5.0	8.0	2.2	3.0	4.0
60	4.0	11.0	1.9	0.0	5.0	8.0	2.2	3.0	4.0	11.0	1.9	0.0	4.0	11.0	1.9	0.0	5.0	8.0	2.2	3.0	4.0	11.0	1.9	0.0	5.0	8.0	2.2	3.0	5.0	8.0	2.2	3.0	4.0	11.0	1.9	0.0	4.0	11.0	1.9	0.0	4.0	11.0	1.9	0.0	5.0	8.0	2.2	3.0	4.0
61	4.0	11.0	1.9	0.0	5.0	8.0	2.2	3.0	5.0	8.0	2.2	3.0	4.0	11.0	1.9	0.0	4.0	11.0	1.9	0.0	5.0	8.0	2.2	3.0	4.0	11.0	1.9	0.0	5.0	8.0	2.2	3.0	4.0	11.0	1.9	0.0	4.0	11.0	1.9	0.0	5.0	8.0	2.2	3.0	5.0	8.0	2.2	3.0	4.0
62	5.0	8.0	2.2	3.0	4.0	11.0	1.9	0.0	5.0	8.0	2.2	3.0	4.0	11.0	1.9	0.0	4.0	11.0	1.9	0.0	4.0	11.0	1.9	0.0	4.0	11.0	1.9	0.0	4.0	11.0	1.9	0.0	5.0	8.0	2.2	3.0	4.0	11.0	1.9	0.0	4.0	11.0	1.9	0.0	4.0	11.0	1.9	0.0	4.0
63	4.0	11.0	1.9	0.0	4.0	11.0	1.9	0.0	4.0	11.0	1.9	0.0	4.0	11.0	1.9	0.0	4.0	11.0	1.9	0.0	4.0	11.0	1.9	0.0	5.0	8.0	2.2	3.0	4.0	11.0	1.9	0.0	5.0	8.0	2.2	3.0	4.0	11.0	1.9	0.0	4.0	11.0	1.9	0.0	4.0	11.0	1.9	0.0	4.0
64	5.0	8.0	2.2	3.0	4.0	11.0	1.9	0.0	4.0	11.0	1.9	0.0	5.0	8.0	2.2	3.0	4.0	11.0	1.9	0.0	5.0	8.0	2.2	3.0	4.0	11.0	1.9	0.0	4.0	11.0	1.9	0.0	4.0	11.0	1.9	0.0	4.0	11.0	1.9	0.0	4.0	11.0	1.9	0.0	4.0	11.0	1.9	0.0	4.0
65	4.0	11.0	1.9	0.0	4.0	11.0	1.9	0.0	5.0	8.0	2.2	3.0	4.0	11.0	1.9	0.0	4.0	11.0	1.9	0.0	4.0	11.0	1.9	0.0	4.0	11.0	1.9	0.0	4.0	11.0	1.9	0.0	4.0	11.0	1.9	0.0	5.0	8.0	2.2	3.0	5.0	8.0	2.2	3.0	4.0	11.0	1.9	0.0	4.0
66	4.0	11.0	1.9	0.0	4.0	11.0	1.9	0.0	4.0	11.0	1.9	0.0	4.0	11.0	1.9	0.0	5.0	8.0	2.2	3.0	4.0	11.0	1.9	0.0	4.0	11.0	1.9	0.0	4.0	11.0	1.9	0.0	4.0	11.0	1.9	0.0	4.0	11.0	1.9	0.0	4.0	11.0	1.9	0.0	5.0	8.0	2.2	3.0	4.0
67	4.0	11.0	1.9	0.0	4.0	11.0	1.9	0.0	4.0	11.0	1.9	0.0	4.0	11.0	1.9	0.0	4.0	11.0	1.9	0.0	4.0	11.0	1.9	0.0	5.0	8.0	2.2	3.0	4.0	11.0	1.9	0.0	4.0	11.0	1.9	0.0	5.0	8.0	2.2	3.0	4.0	11.0	1.9	0.0	5.0	8.0	2.2	3.0	4.0
68	4.0	11.0	1.9	0.0	4.0	11.0	1.9	0.0	5.0	8.0	2.2	3.0	4.0	11.0	1.9	0.0	5.0	8.0	2.2	3.0	4.0	11.0	1.9	0.0	4.0	11.0	1.9	0.0	4.0	11.0	1.9	0.0	5.0	8.0	2.2	3.0	4.0	11.0	1.9	0.0	4.0	11.0	1.9	0.0	4.0	11.0	1.9	0.0	4.0
69	4.0	11.0	1.9	0.0	4.0	11.0	1.9	0.0	5.0	8.0	2.2	3.0	4.0	11.0	1.9	0.0	5.0	8.0	2.2	3.0	4.0	11.0	1.9	0.0	4.0	11.0	1.9	0.0	4.0	11.0	1.9	0.0	4.0	11.0	1.9	0.0	4.0	11.0	1.9	0.0	4.0	11.0	1.9	0.0	4.0	11.0	1.9	0.0	5.0
70	4.0	11.0	1.9	0.0	4.0	11.0	1.9	0.0	4.0	11.0	1.9	0.0	5.0	8.0	2.2	3.0	4.0	11.0	1.9	0.0	4.0	11.0	1.9	0.0	5.0	8.0	2.2	3.0	5.0	8.0	2.2	3.0	4.0	11.0	1.9	0.0	4.0	11.0	1.9	0.0	4.0	11.0	1.9	0.0	4.0	11.0	1.9	0.0	4.0
71	4.0	11.0	1.9	0.0	4.0	11.0	1.9	0.0	4.0	11.0	1.9	0.0	4.0	11.0	1.9	0.0	4.0	11.0	1.9	0.0	5.0	8.0	2.2	3.0	4.0	11.0	1.9	0.0	4.0	11.0	1.9	0.0	4.0	11.0	1.9	0.0	5.0	8.0	2.2	3.0	4.0	11.0	1.9	0.0	5.0	8.0	2.2	3.0	4.0
72	4.0	11.0	1.9	0.0	5.0	8.0	2.2	3.0	4.0	11.0	1.9	0.0	4.0	11.0	1.9	0.0	4.0	11.0	1.9	0.0	4.0	11.0	1.9	0.0	4.0	11.0	1.9	0.0	4.0	11.0	1.9	0.0	5.0	8.0	2.2	3.0	4.0	11.0	1.9	0.0	4.0	11.0	1.9	0.0	4.0	11.0	1.9	0.0	4.0
73	4.0	11.0	1.9	0.0	4.0	11.0	1.9	0.0	5.0	8.0	2.2	3.0	5.0	8.0	2.2	3.0	4.0	11.0	1.9	0.0	4.0	11.0	1.9	0.0	4.0	11.0	1.9	0.0	4.0	11.0	1.9	0.0	5.0	8.0	2.2	3.0	4.0	11.0	1.9	0.0	5.0	8.0	2.2	3.0	4.0	11.0	1.9	0.0	5.0
74	4.0	11.0	1.9	0.0	5.0	8.0	2.2	3.0	4.0	11.0	1.9	0.0	5.0	8.0	2.2	3.0	4.0	11.0	1.9	0.0	5.0	8.0	2.2	3.0	5.0	8.0	2.2	3.0	4.0	11.0	1.9	0.0	4.0	11.0	1.9	0.0	4.0	11.0	1.9	0.0	4.0	11.0	1.9	0.0	4.0	11.0	1.9	0.0	4.0
75	5.0	8.0	2.2	3.0	4.0	11.0	1.9	0.0	4.0	11.0	1.9	0.0	5.0	8.0	2.2	3.0	5.0	8.0	2.2	3.0	4.0	11.0	1.9	0.0	4.0	11.0	1.9	0.0	4.0	11.0	1.9	0.0	4.0	11.0	1.9	0.0	4.0	11.0	1.9	0.0	4.0	11.0	1.9	0.0	4.0	11.0	1.9	0.0	4.0
76	4.0	11.0	1.9	0.0	4.0	11.0	1.9	0.0	4.0	11.0	1.9	0.0	4.0	11.0	1.9	0.0	5.0	8.0	2.2	3.0	4.0	11.0	1.9	0.0	4.0	11.0	1.9	0.0	4.0	11.0	1.9	0.0	5.0	8.0	2.2	3.0	5.0	8.0	2.2	3.0	4.0	11.0	1.9	0.0	5.0	8.0	2.2	3.0	4.0
77	5.0	8.0	2.2	3.0	4.0	11.0	1.9	0.0	5.0	8.0	2.2	3.0	4.0	11.0	1.9	0.0	5.0	8.0	2.2	3.0	5.0	8.0	2.2	3.0	5.0	8.0	2.2	3.0	4.0	11.0	1.9	0.0	4.0	11.0	1.9	0.0	4.0	11.0	1.9	0.0	4.0	11.0	1.9	0.0	4.0	11.0	1.9	0.0	4.0
78	5.0	8.0	2.2	3.0	4.0	11.0	1.9	0.0	4.0	11.0	1.9	0.0	4.0	11.0	1.9	0.0	4.0	11.0	1.9	0.0	4.0	11.0	1.9	0.0	4.0	11.0	1.9	0.0	4.0	11.0	1.9	0.0	5.0	8.0	2.2	3.0	5.0	8.0	2.2	3.0	4.0	11.0	1.9	0.0	4.0	11.0	1.9	0.0	4.0
79	4.0	11.0	1.9	0.0	5.0	8.0	2.2	3.0	4.0	11.0	1.9	0.0	4.0	11.0	1.9	0.0	5.0	8.0	2.2	3.0	4.0	11.0	1.9	0.0	5.0	8.0	2.2	3.0	4.0	11.0	1.9	0.0	4.0	11.0	1.9	0.0	4.0	11.0	1.9	0.0	4.0	11.0	1.9	0.0	4.0	11.0	1.9	0.0	4.0
80	5.0	8.0	2.2	3.0	4.0	11.0	1.9	0.0	4.0	11.0	1.9	0.0	4.0	11.0	1.9	0.0	4.0	11.0	1.9	0.0	4.0	11.0	1.9	0.0	4.0	11.0	1.9	0.0	4.0	11.0	1.9	0.0	4.0	11.0	1.9	0.0	5.0	8.0	2.2	3.0	4.0	11.0	1.9	0.0	4.0	11.0	1.9	0.0	4.0
81	4.0	11.0	1.9	0.0	4.0	11.0	1.9	0.0	5.0	8.0	2.2	3.0	4.0	11.0	1.9	0.0	4.0	11.0	1.9	0.0	4.0	11.0	1.9	0.0	5.0	8.0	2.2	3.0	5.0	8.0	2.2	3.0	4.0	11.0	1.9	0.0	5.0	8.0	2.2	3.0	4.0	11.0	1.9	0.0	5.0	8.0	2.2	3.0	4.0
82	4.0	11.0	1.9	0.0	5.0	8.0	2.2	3.0	4.0	11.0	1.9	0.0	5.0	8.0	2.2	3.0	4.0	11.0	1.9	0.0	5.0	8.0	2.2	3.0	4.0	11.0	1.9	0.0	4.0	11.0	1.9	0.0	5.0	8.0	2.2	3.0	4.0	11.0	1.9	0.0	4.0	11.0	1.9	0.0	4.0	11.0	1.9	0.0	4.0
83	4.0	11.0	1.9	0.0	4.0	11.0	1.9	0.0	5.0	8.0	2.2	3.0	4.0	11.0	1.9	0.0	5.0	8.0	2.2	3.0	4.0	11.0	1.9	0.0	4.0	11.0	1.9	0.0	5.0	8.0	2.2	3.0	4.0	11.0	1.9	0.0	4.0	11.0	1.9	0.0	4.0	11.0	1.9	0.0	5.0	8.0	2.2	3.0	4.0
84	5.0	8.0	2.2	3.0	5.0	8.0	2.2	3.0	4.0	11.0	1.9	0.0	4.0	11.0	1.9	0.0	4.0	11.0	1.9	0.0	4.0	11.0	1.9	0.0	4.0	11.0	1.9	0.0	5.0	8.0	2.2	3.0	5.0	8.0	2.2	3.0	4.0	11.0	1.9	0.0	4.0	11.0	1.9	0.0	5.0	8.0	2.2	3.0	4.0
85	4.0	11.0	1.9	0.0	4.0	11.0	1.9	0.0	4.0	11.0	1.9	0.0	5.0	8.0	2.2	3.0	4.0	11.0	1.9	0.0	4.0	11.0	1.9	0.0	4.0	11.0	1.9	0.0	4.0	11.0	1.9	0.0	4.0	11.0	1.9	0.0	4.0	11.0	1.9	0.0	4.0	11.0	1.9	0.0	4.0	11.0	1.9	0.0	5.0
86	4.0	11.0	1.9	0.0	4.0	11.0	1.9	0.0	5.0	8.0	2.2	3.0	5.0	8.0	2.2	3.0	4.0	11.0	1.9	0.0	4.0	11.0	1.9	0.0	4.0	11.0	1.9	0.0	4.0	11.0	1.9	0.0	4.0	11.0	1.9	0.0	4.0	11.0	1.9	0.0	4.0	11.0	1.9	0.0	4.0	11.0	1.9	0.0	5.0
87	4.0	11.0	1.9	0.0	4.0	11.0	1.9	0.0	5.0	8.0	2.2	3.0	4.0	11.0	1.9	0.0	4.0	11.0	1.9	0.0	4.0	11.0	1.9	0.0	4.0	11.0	1.9	0.0	5.0	8.0	2.2	3.0	4.0	11.0	1.9	0.0	4.0	11.0	1.9	0.0	4.0	11.0	1.9	0.0	4.0	11.0	1.9	0.0	4.0
88	4.0	11.0	1.9	0.0	4.0	11.0	1.9	0.0	4.0	11.0	1.9	0.0	4.0	11.0	1.9	0.0	4.0	11.0	1.9	0.0	4.0	11.0	1.9	0.0	4.0	11.0	1.9	0.0	4.0	11.0	1.9	0.0	4.0	11.0	1.9	0.0	4.0	11.0	1.9	0.0	4.0	11.0	1.9	0.0	5.0	8.0	2.2	3.0	5.0
89	5.0	8.0	2.2	3.0	5.0	8.0	2.2	3.0	5.0	8.0	2.2	3.0	4.0	11.0	1.9	0.0	5.0	8.0	2.2	3.0	4.0	11.0	1.9	0.0	4.0	11.0	1.9	0.0	4.0	11.0	1.9	0.0	4.0	11.0	1.9	0.0	4.0	11.0	1.9	0.0	4.0	11.0	1.9	0.0	4.0	11.0	1.9	0.0	4.0
90	5.0	8.0	2.2	3.0	5.0	8.0	2.2	3.0	4.0	11.0	1.9	0.0	4.0	11.0	1.9	0.0	4.0	11.0	1.9	0.0	4.0	11.0	1.9	0.0	4.0	11.0	1.9	0.0	4.0	11.0	1.9	0.0	4.0	11.0	1.9	0.0	5.0	8.0	2.2	3.0	4.0	11.0	1.9	0.0	5.0	8.0	2.2	3.0	4.0
91	4.0	11.0	1.9	0.0	4.0	11.0	1.9	0.0	4.0	11.0	1.9	0.0	4.0	11.0	1.9	0.0	4.0	11.0	1.9	0.0	4.0	11.0	1.9	0.0	4.0	11.0	1.9	0.0	4.0	11.0	1.9	0.0	4.0	11.0	1.9	0.0	5.0	8.0	2.2	3.0	4.0	11.0	1.9	0.0	5.0	8.0	2.2	3.0	5.0
92	4.0	11.0	1.9	0.0	5.0	8.0	2.2	3.0	4.0	11.0	1.9	0.0	4.0	11.0	1.9	0.0	4.0	11.0	1.9	0.0	4.0	11.0	1.9	0.0	4.0	11.0	1.9	0.0	4.0	11.0	1.9	0.0	4.0	11.0	1.9	0.0	4.0	11.0	1.9	0.0	4.0	11.0	1.9	0.0	4.0	11.0	1.9	0.0	5.0
93	4.0	11.0	1.9	0.0	4.0	11.0	1.9	0.0	5.0	8.0	2.2	3.0	4.0	11.0	1.9	0.0	5.0	8.0	2.2	3.0	4.0	11.0	1.9	0.0	4.0	11.0	1.9	0.0	4.0	11.0	1.9	0.0	4.0	11.0	1.9	0.0	4.0	11.0	1.9	0.0	5.0	8.0	2.2	3.0	4.0	11.0	1.9	0.0	4.0
94	4.0	11.0	1.9	0.0	5.0	8.0	2.2	3.0	4.0	11.0	1.9	0.0	5.0	8.0	2.2	3.0	4.0	11.0	1.9	0.0	4.0	11.0	1.9	0.0	5.0	8.0	2.2	3.0	4.0	11.0	1.9	0.0	4.0	11.0	1.9	0.0	5.0	8.0	2.2	3.0	4.0	11.0	1.9	0.0	4.0	11.0	1.9	0.0	4.0
95	4.0	11.0	1.9	0.0	5.0	8.0	2.2	3.0	4.0	11.0	1.9	0.0	4.0	11.0	1.9	0.0	4.0	11.0	1.9	0.0	4.0	11.0	1.9	0.0	5.0	8.0	2.2	3.0	4.0	11.0	1.9	0.0	4.0	11.0	1.9	0.0	4.0	11.0	1.9	0.0	4.0	11.0	1.9	0.0	5.0	8.0	2.2	3.0	4.0
96	4.0	11.0	1.9	0.0	4.0	11.0	1.9	0.0	4.0	11.0	1.9	0.0	4.0	11.0	1.9	0.0	4.0	11.0	1.9	0.0	5.0	8.0	2.2	3.0	4.0	11.0	1.9	0.0	5.0	8.0	2.2	3.0	4.0	11.0	1.9	0.0	5.0	8.0	2.2	3.0	5.0	8.0	2.2	3.0	4.0	11.0	1.9	0.0	5.0
97	4.0	11.0	1.9	0.0	4.0	11.0	1.9	0.0	4.0	11.0	1.9	0.0	4.0	11.0	1.9	0.0	5.0	8.0	2.2	3.0	4.0	11.0	1.9	0.0	5.0	8.0	2.2	3.0	5.0	8.0	2.2	3.0	4.0	11.0	1.9	0.0	4.0	11.0	1.9	0.0	4.0	11.0	1.9	0.0	4.0	11.0	1.9	0.0	5.0
98	4.0	11.0	1.9	0.0	5.0	8.0	2.2	3.0	5.0	8.0	2.2	3.0	4.0	11.0	1.9	0.0	4.0	11.0	1.9	0.0	4.0	11.0	1.9	0.0	4.0	11.0	1.9	0.0	5.0	8.0	2.2	3.0	4.0	11.0	1.9	0.0	4.0	11.0	1.9	0.0	4.0	11.0	1.9	0.0	4.0	11.0	1.9	0.0	4.0
99	4.0	11.0	1.9	0.0	5.0	8.0	2.2	3.0	4.0	11.0	1.9	0.0	4.0	11.0	1.9	0.0	4.0	11.0	1.9	0.0	5.0	8.0	2.2	3.0	5.0	8.0	2.2	3.0	4.0	11.0	1.9	0.0	4.0	11.0	1.9	0.0	4.0	11.0	1.9	0.0	4.0	11.0	1.9	0.0	4.0	11.0	1.9	0.0	5.0
100	4.0	11.0	1.9	0.0	4.0	11.0	1.9	0.0	4.0	11.0	1.9	0.0	5.0	8.0	2.2	3.0	5.0	8.0	2.2	3.0	4.0	11.0	1.9	0.0	5.0	8.0	2.2	3.0	4.0	11.0	1.9	0.0	4.0	11.0	1.9	0.0	4.0	11.0	1.9	0.0	4.0	11.0	1.9	0.0	4.0	11.0	1.9	0.0	4.0
101	5.0	8.0	2.2	3.0	4.0	11.0	1.9	0.0	4.0	11.0	1.9	0.0	5.0	8.0	2.2	3.0	4.0	11.0	1.9	0.0	4.0	11.0	1.9	0.0	4.0	11.0	1.9	0.0	4.0	11.0	1.9	0.0	4.0	11.0	1.9	0.0	4.0	11.0	1.9	0.0	4.0	11.0	1.9	0.0	4.0	11.0	1.9	0.0	4.0
102	4.0	11.0	1.9	0.0	4.0	11.0	1.9	0.0	4.0	11.0	1.9	0.0	4.0	11.0	1.9	0.0	4.0	11.0	1.9	0.0	4.0	11.0	1.9	0.0	5.0	8.0	2.2	3.0	4.0	11.0	1.9	0.0	4.0	11.0	1.9	0.0	4.0	11.0	1.9	0.0	5.0	8.0	2.2	3.0	4.0	11.0	1.9	0.0	4.0
103	5.0	8.0	2.2	3.0	4.0	11.0	1.9	0.0	5.0	8.0	2.2	3.0	4.0	11.0	1.9	0.0	4.0	11.0	1.9	0.0	4.0	11.0	1.9	0.0	4.0	11.0	1.9	0.0	4.0	11.0	1.9	0.0	4.0	11.0	1.9	0.0	4.0	11.0	1.9	0.0	4.0	11.0	1.9	0.0	4.0	11.0	1.9	0.0	5.0
104	4.0	11.0	1.9	0.0	4.0	11.0	1.9	0.0	4.0	11.0	1.9	0.0	4.0	11.0	1.9	0.0	5.0	8.0	2.2	3.0	4.0	11.0	1.9	0.0	5.0	8.0	2.2	3.0	5.0	8.0	2.2	3.0	4.0	11.0	1.9	0.0	4.0	11.0	1.9	0.0	4.0	11.0	1.9	0.0	4.0	11.0	1.9	0.0	4.0
105	4.0	11.0	1.9	0.0	5.0	8.0	2.2	3.0	4.0	11.0	1.9	0.0	4.0	11.0	1.9	0.0	4.0	11.0	1.9	0.0	5.0	8.0	2.2	3.0	4.0	11.0	1.9	0.0	4.0	11.0	1.9	0.0	4.0	11.0	1.9	0.0	4.0	11.0	1.9	0.0	4.0	11.0	1.9	0.0	5.0	8.0	2.2	3.0	4.0
106	5.0	8.0	2.2	3.0	4.0	11.0	1.9	0.0	4.0	11.0	1.9	0.0	4.0	11.0	1.9	0.0	4.0	11.0	1.9	0.0	4.0	11.0	1.9	0.0	4.0	11.0	1.9	0.0	4.0	11.0	1.9	0.0	4.0	11.0	1.9	0.0	4.0	11.0	1.9	0.0	4.0	11.0	1.9	0.0	5.0	8.0	2.2	3.0	5.0
107	5.0	8.0	2.2	3.0	5.0	8.0	2.2	3.0	4.0	11.0	1.9	0.0	5.0	8.0	2.2	3.0	4.0	11.0	1.9	0.0	4.0	11.0	1.9	0.0	4.0	11.0	1.9	0.0	4.0	11.0	1.9	0.0	4.0	11.0	1.9	0.0	4.0	11.0	1.9	0.0	4.0	11.0	1.9	0.0	4.0	11.0	1.9	0.0	4.0
108	5.0	8.0	2.2	3.0	5.0	8.0	2.2	3.0	4.0	11.0	1.9	0.0	5.0	8.0	2.2	3.0	4.0	11.0	1.9	0.0	4.0	11.0	1.9	0.0	4.0	11.0	1.9	0.0	4.0	11.0	1.9	0.0	5.0	8.0	2.2	3.0	4.0	11.0	1.9	0.0	4.0	11.0	1.9	0.0	4.0	11.0	1.9	0.0	4.0
109	5.0	8.0	2.2	3.0	4.0	11.0	1.9	0.0	4.0	11.0	1.9	0.0	4.0	11.0	1.9	0.0	4.0	11.0	1.9	0.0	4.0	11.0	1.9	0.0	4.0	11.0	1.9	0.0	4.0	11.0	1.9	0.0	4.0	11.0	1.9	0.0	5.0	8.0	2.2	3.0	4.0	11.0	1.9	0.0	4.0	11.0	1.9	0.0	5.0
110	4.0	11.0	1.9	0.0	5.0	8.0	2.2	3.0	4.0	11.0	1.9	0.0	5.0	8.0	2.2	3.0	4.0	11.0	1.9	0.0	4.0	11.0	1.9	0.0	4.0	11.0	1.9	0.0	4.0	11.0	1.9	0.0	4.0	11.0	1.9	0.0	4.0	11.0	1.9	0.0	4.0	11.0	1.9	0.0	5.0	8.0	2.2	3.0	4.0
111	4.0	11.0	1.9	0.0	4.0	11.0	1.9	0.0	4.0	11.0	1.9	0.0	4.0	11.0	1.9	0.0	4.0	11.0	1.9	0.0	4.0	11.0	1.9	0.0	4.0	11.0	1.9	0.0	5.0	8.0	2.2	3.0	4.0	11.0	1.9	0.0	5.0	8.0	2.2	3.0	4.0	11.0	1.9	0.0	4.0	11.0	1.9	0.0	4.0
112	4.0	11.0	1.9	0.0	4.0	11.0	1.9	0.0	4.0	11.0	1.9	0.0	5.0	8.0	2.2	3.0	5.0	8.0	2.2	3.0	4.0	11.0	1.9	0.0	4.0	11.0	1.9	0.0	4.0	11.0	1.9	0.0	5.0	8.0	2.2	3.0	4.0	11.0	1.9	0.0	4.0	11.0	1.9	0.0	4.0	11.0	1.9	0.0	4.0
113	4.0	11.0	1.9	0.0	4.0	11.0	1.9	0.0	4.0	11.0	1.9	0.0	5.0	8.0	2.2	3.0	4.0	11.0	1.9	0.0	4.0	11.0	1.9	0.0	4.0	11.0	1.9	0.0	5.0	8.0	2.2	3.0	4.0	11.0	1.9	0.0	4.0	11.0	1.9	0.0	4.0	11.0	1.9	0.0	4.0	11.0	1.9	0.0	5.0
114	4.0	11.0	1.9	0.0	4.0	11.0	1.9	0.0	4.0	11.0	1.9	0.0	4.0	11.0	1.9	0.0	5.0	8.0	2.2	3.0	5.0	8.0	2.2	3.0	5.0	8.0	2.2	3.0	4.0	11.0	1.9	0.0	4.0	11.0	1.9	0.0	5.0	8.0	2.2	3.0	5.0	8.0	2.2	3.0	4.0	11.0	1.9	0.0	4.0
115	5.0	8.0	2.2	3.0	4.0	11.0	1.9	0.0	4.0	11.0	1.9	0.0	4.0	11.0	1.9	0.0	4.0	11.0	1.9	0.0	4.0	11.0	1.9	0.0	5.0	8.0	2.2	3.0	4.0	11.0	1.9	0.0	4.0	11.0	1.9	0.0	4.0	11.0	1.9	0.0	4.0	11.0	1.9	0.0	5.0	8.0	2.2	3.0	4.0
116	5.0	8.0	2.2	3.0	4.0	11.0	1.9	0.0	4.0	11.0	1.9	0.0	5.0	8.0	2.2	3.0	4.0	11.0	1.9	0.0	4.0	11.0	1.9	0.0	4.0	11.0	1.9	0.0	4.0	11.0	1.9	0.0	5.0	8.0	2.2	3.0	4.0	11.0	1.9	0.0	4.0	11.0	1.9	0.0	4.0	11.0	1.9	0.0	4.0
117	4.0	11.0	1.9	0.0	4.0	11.0	1.9	0.0	4.0	11.0	1.9	0.0	4.0	11.0	1.9	0.0	4.0	11.0	1.9	0.0	5.0	8.0	2.2	3.0	4.0	11.0	1.9	0.0	5.0	8.0	2.2	3.0	4.0	11.0	1.9	0.0	4.0	11.0	1.9	0.0	4.0	11.0	1.9	0.0	4.0	11.0	1.9	0.0	4.0
118	5.0	8.0	2.2	3.0	4.0	11.0	1.9	0.0	4.0	11.0	1.9	0.0	4.0	11.0	1.9	0.0	4.0	11.0	1.9	0.0	4.0	11.0	1.9	0.0	4.0	11.0	1.9	0.0	4.0	11.0	1.9	0.0	4.0	11.0	1.9	0.0	4.0	11.0	1.9	0.0	4.0	11.0	1.9	0.0	5.0	8.0	2.2	3.0	4.0
119	4.0	11.0	1.9	0.0	4.0	11.0	1.9	0.0	4.0	11.0	1.9	0.0	4.0	11.0	1.9	0.0	5.0	8.0	2.2	3.0	4.0	11.0	1.9	0.0	4.0	11.0	1.9	0.0	4.0	11.0	1.9	0.0	4.0	11.0	1.9	0.0	5.0	8.0	2.2	3.0	4.0	11.0	1.9	0.0	4.0	11.0	1.9	0.0	4.0
120	4.0	11.0	1.9	0.0	5.0	8.0	2.2	3.0	5.0	8.0	2.2	3.0	4.0	11.0	1.9	0.0	4.0	11.0	1.9	0.0	4.0	11.0	1.9	0.0	5.0	8.0	2.2	3.0	4.0	11.0	1.9	0.0	4.0	11.0	1.9	0.0	5.0	8.0	2.2	3.0	4.0	11.0	1.9	0.0	4.0	11.0	1.9	0.0	4.0
121	5.0	8.0	2.2	3.0	4.0	11.0	1.9	0.0	4.0	11.0	1.9	0.0	4.0	11.0	1.9	0.0	4.0	11.0	1.9	0.0	4.0	11.0	1.9	0.0	5.0	8.0	2.2	3.0	4.0	11.0	1.9	0.0	4.0	11.0	1.9	0.0	4.0	11.0	1.9	0.0	5.0	8.0	2.2	3.0	4.0	11.0	1.9	0.0	5.0
122	4.0	11.0	1.9	0.0	4.0	11.0	1.9	0.0	4.0	11.0	1.9	0.0	4.0	11.0	1.9	0.0	4.0	11.0	1.9	0.0	4.0	11.0	1.9	0.0	4.0	11.0	1.9	0.0	5.0	8.0	2.2	3.0	4.0	11.0	1.9	0.0	5.0	8.0	2.2	3.0	4.0	11.0	1.9	0.0	4.0	11.0	1.9	0.0	5.0
123	4.0	11.0	1.9	0.0	4.0	11.0	1.9	0.0	5.0	8.0	2.2	3.0	4.0	11.0	1.9	0.0	4.0	11.0	1.9	0.0	5.0	8.0	2.2	3.0	4.0	11.0	1.9	0.0	4.0	11.0	1.9	0.0	4.0	11.0	1.9	0.0	4.0	11.0	1.9	0.0	4.0	11.0	1.9	0.0	4.0	11.0	1.9	0.0	4.0
124	4.0	11.0	1.9	0.0	4.0	11.0	1.9	0.0	4.0	11.0	1.9	0.0	4.0	11.0	1.9	0.0	4.0	11.0	1.9	0.0	5.0	8.0	2.2	3.0	4.0	11.0	1.9	0.0	4.0	11.0	1.9	0.0	4.0	11.0	1.9	0.0	4.0	11.0	1.9	0.0	4.0	11.0	1.9	0.0	5.0	8.0	2.2	3.0	4.0
125	5.0	8.0	2.2	3.0	4.0	11.0	1.9	0.0	4.0	11.0	1.9	0.0	5.0	8.0	2.2	3.0	4.0	11.0	1.9	0.0	4.0	11.0	1.9	0.0	4.0	11.0	1.9	0.0	4.0	11.0	1.9	0.0	4.0	11.0	1.9	0.0	4.0	11.0	1.9	0.0	4.0	11.0	1.9	0.0	5.0	8.0	2.2	3.0	4.0
126	5.0	8.0	2.2	3.0	5.0	8.0	2.2	3.0	5.0	8.0	2.2	3.0	5.0	8.0	2.2	3.0	4.0	11.0	1.9	0.0	5.0	8.0	2.2	3.0	4.0	11.0	1.9	0.0	4.0	11.0	1.9	0.0	4.0	11.0	1.9	0.0	4.0	11.0	1.9	0.0	5.0	8.0	2.2	3.0	4.0	11.0	1.9	0.0	4.0
127	4.0	11.0	1.9	0.0	4.0	11.0	1.9	0.0	4.0	11.0	1.9	0.0	5.0	8.0	2.2	3.0	5.0	8.0	2.2	3.0	4.0	11.0	1.9	0.0	4.0	11.0	1.9	0.0	5.0	8.0	2.2	3.0	4.0	11.0	1.9	0.0	4.0	11.0	1.9	0.0	4.0	11.0	1.9	0.0	4.0	11.0	1.9	0.0	4.0
128	4.0	11.0	1.9	0.0	4.0	11.0	1.9	0.0	5.0	8.0	2.2	3.0	4.0	11.0	1.9	0.0	4.0	11.0	1.9	0.0	5.0	8.0	2.2	3.0	4.0	11.0	1.9	0.0	4.0	11.0	1.9	0.0	5.0	8.0	2.2	3.0	4.0	11.0	1.9	0.0	4.0	11.0	1.9	0.0	4.0	11.0	1.9	0.0	4.0
129	4.0	11.0	1.9	0.0	4.0	11.0	1.9	0.0	4.0	11.0	1.9	0.0	4.0	11.0	1.9	0.0	4.0	11.0	1.9	0.0	5.0	8.0	2.2	3.0	5.0	8.0	2.2	3.0	4.0	11.0	1.9	0.0	4.0	11.0	1.9	0.0	4.0	11.0	1.9	0.0	4.0	11.0	1.9	0.0	4.0	11.0	1.9	0.0	4.0
130	4.0	11.0	1.9	0.0	5.0	8.0	2.2	3.0	5.0	8.0	2.2	3.0	5.0	8.0	2.2	3.0	5.0	8.0	2.2	3.0	4.0	11.0	1.9	0.0	4.0	11.0	1.9	0.0	4.0	11.0	1.9	0.0	4.0	11.0	1.9	0.0	5.0	8.0	2.2	3.0	4.0	11.0	1.9	0.0	4.0	11.0	1.9	0.0	4.0
131	4.0	11.0	1.9	0.0	4.0	11.0	1.9	0.0	4.0	11.0	1.9	0.0	5.0	8.0	2.2	3.0	4.0	11.0	1.9	0.0	5.0	8.0	2.2	3.0	5.0	8.0	2.2	3.0	5.0	8.0	2.2	3.0	4.0	11.0	1.9	0.0	5.0	8.0	2.2	3.0	4.0	11.0	1.9	0.0	5.0	8.0	2.2	3.0	4.0
132	4.0	11.0	1.9	0.0	5.0	8.0	2.2	3.0	4.0	11.0	1.9	0.0	4.0	11.0	1.9	0.0	5.0	8.0	2.2	3.0	4.0	11.0	1.9	0.0	4.0	11.0	1.9	0.0	4.0	11.0	1.9	0.0	4.0	11.0	1.9	0.0	4.0	11.0	1.9	0.0	4.0	11.0	1.9	0.0	5.0	8.0	2.2	3.0	5.0
133	4.0	11.0	1.9	0.0	4.0	11.0	1.9	0.0	4.0	11.0	1.9	0.0	4.0	11.0	1.9	0.0	5.0	8.0	2.2	3.0	4.0	11.0	1.9	0.0	4.0	11.0	1.9	0.0	4.0	11.0	1.9	0.0	4.0	11.0	1.9	0.0	5.0	8.0	2.2	3.0	5.0	8.0	2.2	3.0	4.0	11.0	1.9	0.0	4.0
134	4.0	11.0	1.9	0.0	5.0	8.0	2.2	3.0	4.0	11.0	1.9	0.0	5.0	8.0	2.2	3.0	4.0	11.0	1.9	0.0	4.0	11.0	1.9	0.0	4.0	11.0	1.9	0.0	4.0	11.0	1.9	0.0	4.0	11.0	1.9	0.0	4.0	11.0	1.9	0.0	4.0	11.0	1.9	0.0	4.0	11.0	1.9	0.0	4.0
135	4.0	11.0	1.9	0.0	5.0	8.0	2.2	3.0	4.0	11.0	1.9	0.0	4.0	11.0	1.9	0.0	4.0	11.0	1.9	0.0	4.0	11.0	1.9	0.0	4.0	11.0	1.9	0.0	4.0	11.0	1.9	0.0	4.0	11.0	1.9	0.0	4.0	11.0	1.9	0.0	5.0	8.0	2.2	3.0	4.0	11.0	1.9	0.0	4.0
136	4.0	11.0	1.9	0.0	5.0	8.0	2.2	3.0	4.0	11.0	1.9	0.0	4.0	11.0	1.9	0.0	4.0	11.0	1.9	0.0	4.0	11.0	1.9	0.0	4.0	11.0	1.9	0.0	4.0	11.0	1.9	0.0	5.0	8.0	2.2	3.0	4.0	11.0	1.9	0.0	4.0	11.0	1.9	0.0	5.0	8.0	2.2	3.0	4.0
137	4.0	11.0	1.9	0.0	4.0	11.0	1.9	0.0	4.0	11.0	1.9	0.0	4.0	11.0	1.9	0.0	5.0	8.0	2.2	3.0	4.0	11.0	1.9	0.0	4.0	11.0	1.9	0.0	4.0	11.0	1.9	0.0	4.0	11.0	1.9	0.0	4.0	11.0	1.9	0.0	5.0	8.0	2.2	3.0	4.0	11.0	1.9	0.0	5.0
138	4.0	11.0	1.9	0.0	4.0	11.0	1.9	0.0	5.0	8.0	2.2	3.0	4.0	11.0	1.9	0.0	4.0	11.0	1.9	0.0	4.0	11.0	1.9	0.0	4.0	11.0	1.9	0.0	5.0	8.0	2.2	3.0	4.0	11.0	1.9	0.0	4.0	11.0	1.9	0.0	5.0	8.0	2.2	3.0	4.0	11.0	1.9	0.0	5.0
139	4.0	11.0	1.9	0.0	5.0	8.0	2.2	3.0	5.0	8.0	2.2	3.0	4.0	11.0	1.9	0.0	4.0	11.0	1.9	0.0	4.0	11.0	1.9	0.0	5.0	8.0	2.2	3.0	4.0	11.0	1.9	0.0	4.0	11.0	1.9	0.0	4.0	11.0	1.9	0.0	4.0	11.0	1.9	0.0	4.0	11.0	1.9	0.0	5.0
140	4.0	11.0	1.9	0.0	4.0	11.0	1.9	0.0	5.0	9.0	2.28	2.0	4.0	11.0	1.9	0.0	4.0	11.0	1.9	0.0	4.0	11.0	1.9	0.0	4.0	11.0	1.9	0.0	4.0	11.0	1.9	0.0	4.0	11.0	1.9	0.0	4.0	11.0	1.9	0.0	4.0	11.0	1.9	0.0	4.0	11.0	1.9	0.0	4.0
141	4.0	11.0	1.9	0.0	5.0	9.0	2.28	2.0	4.0	11.0	1.9	0.0	4.0	11.0	1.9	0.0	5.0	9.0	2.28	2.0	4.0	11.0	1.9	0.0	4.0	11.0	1.9	0.0	4.0	11.0	1.9	0.0	4.0	11.0	1.9	0.0	5.0	9.0	2.28	2.0	4.0	11.0	1.9	0.0	4.0	11.0	1.9	0.0	4.0
142	5.0	9.0	2.28	2.0	4.0	11.0	1.9	0.0	4.0	11.0	1.9	0.0	4.0	11.0	1.9	0.0	4.0	11.0	1.9	0.0	4.0	11.0	1.9	0.0	4.0	11.0	1.9	0.0	4.0	11.0	1.9	0.0	4.0	11.0	1.9	0.0	4.0	11.0	1.9	0.0	4.0	11.0	1.9	0.0	4.0	11.0	1.9	0.0	5.0
143	5.0	9.0	2.28	2.0	4.0	11.0	1.9	0.0	4.0	11.0	1.9	0.0	4.0	11.0	1.9	0.0	5.0	9.0	2.28	2.0	4.0	11.0	1.9	0.0	4.0	11.0	1.9	0.0	5.0	9.0	2.28	2.0	4.0	11.0	1.9	0.0	5.0	9.0	2.28	2.0	5.0	9.0	2.28	2.0	4.0	11.0	1.9	0.0	4.0
144	4.0	11.0	1.9	0.0	5.0	9.0	2.28	2.0	5.0	9.0	2.28	2.0	4.0	11.0	1.9	0.0	4.0	11.0	1.9	0.0	5.0	9.0	2.28	2.0	4.0	11.0	1.9	0.0	4.0	11.0	1.9	0.0	4.0	11.0	1.9	0.0	4.0	11.0	1.9	0.0	4.0	11.0	1.9	0.0	4.0	11.0	1.9	0.0	5.0
145	4.0	11.0	1.9	0.0	4.0	11.0	1.9	0.0	4.0	11.0	1.9	0.0	4.0	11.0	1.9	0.0	4.0	11.0	1.9	0.0	4.0	11.0	1.9	0.0	4.0	11.0	1.9	0.0	4.0	11.0	1.9	0.0	4.0	11.0	1.9	0.0	5.0	9.0	2.28	2.0	4.0	11.0	1.9	0.0	4.0	11.0	1.9	0.0	4.0
146	4.0	11.0	1.9	0.0	5.0	9.0	2.28	2.0	4.0	11.0	1.9	0.0	4.0	11.0	1.9	0.0	4.0	11.0	1.9	0.0	5.0	9.0	2.28	2.0	4.0	11.0	1.9	0.0	4.0	11.0	1.9	0.0	4.0	11.0	1.9	0.0	4.0	11.0	1.9	0.0	5.0	9.0	2.28	2.0	5.0	9.0	2.28	2.0	4.0
147	4.0	11.0	1.9	0.0	4.0	11.0	1.9	0.0	4.0	11.0	1.9	0.0	5.0	9.0	2.28	2.0	4.0	11.0	1.9	0.0	4.0	11.0	1.9	0.0	4.0	11.0	1.9	0.0	4.0	11.0	1.9	0.0	4.0	11.0	1.9	0.0	4.0	11.0	1.9	0.0	4.0	11.0	1.9	0.0	4.0	11.0	1.9	0.0	4.0
148	4.0	11.0	1.9	0.0	5.0	9.0	2.28	2.0	4.0	11.0	1.9	0.0	4.0	11.0	1.9	0.0	4.0	11.0	1.9	0.0	4.0	11.0	1.9	0.0	4.0	11.0	1.9	0.0	4.0	11.0	1.9	0.0	4.0	11.0	1.9	0.0	4.0	11.0	1.9	0.0	4.0	11.0	1.9	0.0	4.0	11.0	1.9	0.0	4.0
149	4.0	11.0	1.9	0.0	5.0	9.0	2.28	2.0	4.0	11.0	1.9	0.0	4.0	11.0	1.9	0.0	4.0	11.0	1.9	0.0	5.0	9.0	2.28	2.0	4.0	11.0	1.9	0.0	4.0	11.0	1.9	0.0	4.0	11.0	1.9	0.0	4.0	11.0	1.9	0.0	4.0	11.0	1.9	0.0	4.0	11.0	1.9	0.0	4.0
150	4.0	11.0	1.9	0.0	4.0	11.0	1.9	0.0	4.0	11.0	1.9	0.0	4.0	11.0	1.9	0.0	5.0	9.0	2.28	2.0	4.0	11.0	1.9	0.0	5.0	9.0	2.28	2.0	4.0	11.0	1.9	0.0	5.0	9.0	2.28	2.0	4.0	11.0	1.9	0.0	5.0	9.0	2.28	2.0	4.0	11.0	1.9	0.0	4.0
151	4.0	11.0	1.9	0.0	4.0	11.0	1.9	0.0	4.0	11.0	1.9	0.0	4.0	11.0	1.9	0.0	4.0	11.0	1.9	0.0	4.0	11.0	1.9	0.0	5.0	9.0	2.28	2.0	4.0	11.0	1.9	0.0	4.0	11.0	1.9	0.0	4.0	11.0	1.9	0.0	4.0	11.0	1.9	0.0	5.0	9.0	2.28	2.0	4.0
152	4.0	11.0	1.9	0.0	5.0	9.0	2.28	2.0	5.0	9.0	2.28	2.0	4.0	11.0	1.9	0.0	4.0	11.0	1.9	0.0	4.0	11.0	1.9	0.0	5.0	9.0	2.28	2.0	4.0	11.0	1.9	0.0	4.0	11.0	1.9	0.0	4.0	11.0	1.9	0.0	4.0	11.0	1.9	0.0	4.0	11.0	1.9	0.0	4.0
153	4.0	11.0	1.9	0.0	4.0	11.0	1.9	0.0	4.0	11.0	1.9	0.0	4.0	11.0	1.9	0.0	5.0	9.0	2.28	2.0	4.0	11.0	1.9	0.0	4.0	11.0	1.9	0.0	5.0	9.0	2.28	2.0	5.0	9.0	2.28	2.0	4.0	11.0	1.9	0.0	5.0	9.0	2.28	2.0	4.0	11.0	1.9	0.0	4.0
154	4.0	11.0	1.9	0.0	4.0	11.0	1.9	0.0	4.0	11.0	1.9	0.0	5.0	9.0	2.28	2.0	4.0	11.0	1.9	0.0	4.0	11.0	1.9	0.0	4.0	11.0	1.9	0.0	4.0	11.0	1.9	0.0	4.0	11.0	1.9	0.0	4.0	11.0	1.9	0.0	4.0	11.0	1.9	0.0	5.0	9.0	2.28	2.0	4.0
155	4.0	11.0	1.9	0.0	5.0	9.0	2.28	2.0	4.0	11.0	1.9	0.0	4.0	11.0	1.9	0.0	4.0	11.0	1.9	0.0	4.0	11.0	1.9	0.0	4.0	11.0	1.9	0.0	5.0	9.0	2.28	2.0	4.0	11.0	1.9	0.0	4.0	11.0	1.9	0.0	5.0	9.0	2.28	2.0	4.0	11.0	1.9	0.0	4.0
156	4.0	11.0	1.9	0.0	4.0	11.0	1.9	0.0	4.0	11.0	1.9	0.0	4.0	11.0	1.9	0.0	4.0	11.0	1.9	0.0	4.0	11.0	1.9	0.0	5.0	9.0	2.28	2.0	4.0	11.0	1.9	0.0	4.0	11.0	1.9	0.0	4.0	11.0	1.9	0.0	4.0	11.0	1.9	0.0	4.0	11.0	1.9	0.0	4.0
157	4.0	11.0	1.9	0.0	4.0	11.0	1.9	0.0	4.0	11.0	1.9	0.0	4.0	11.0	1.9	0.0	4.0	11.0	1.9	0.0	4.0	11.0	1.9	0.0	4.0	11.0	1.9	0.0	4.0	11.0	1.9	0.0	4.0	11.0	1.9	0.0	5.0	9.0	2.28	2.0	4.0	11.0	1.9	0.0	4.0	11.0	1.9	0.0	5.0
158	5.0	9.0	2.28	2.0	4.0	11.0	1.9	0.0	4.0	11.0	1.9	0.0	4.0	11.0	1.9	0.0	4.0	11.0	1.9	0.0	4.0	11.0	1.9	0.0	5.0	9.0	2.28	2.0	4.0	11.0	1.9	0.0	5.0	9.0	2.28	2.0	5.0	9.0	2.28	2.0	4.0	11.0	1.9	0.0	4.0	11.0	1.9	0.0	4.0
159	4.0	11.0	1.9	0.0	4.0	11.0	1.9	0.0	5.0	9.0	2.28	2.0	4.0	11.0	1.9	0.0	4.0	11.0	1.9	0.0	4.0	11.0	1.9	0.0	5.0	9.0	2.28	2.0	5.0	9.0	2.28	2.0	4.0	11.0	1.9	0.0	5.0	9.0	2.28	2.0	4.0	11.0	1.9	0.0	4.0	11.0	1.9	0.0	5.0
160	4.0	11.0	1.9	0.0	5.0	9.0	2.28	2.0	4.0	11.0	1.9	0.0	4.0	11.0	1.9	0.0	5.0	9.0	2.28	2.0	4.0	11.0	1.9	0.0	4.0	11.0	1.9	0.0	4.0	11.0	1.9	0.0	4.0	11.0	1.9	0.0	4.0	11.0	1.9	0.0	4.0	11.0	1.9	0.0	4.0	11.0	1.9	0.0	4.0
161	4.0	11.0	1.9	0.0	4.0	11.0	1.9	0.0	4.0	11.0	1.9	0.0	5.0	9.0	2.28	2.0	4.0	11.0	1.9	0.0	4.0	11.0	1.9	0.0	4.0	11.0	1.9	0.0	4.0	11.0	1.9	0.0	5.0	9.0	2.28	2.0	5.0	9.0	2.28	2.0	4.0	11.0	1.9	0.0	4.0	11.0	1.9	0.0	4.0
162	4.0	11.0	1.9	0.0	4.0	11.0	1.9	0.0	5.0	9.0	2.28	2.0	4.0	11.0	1.9	0.0	4.0	11.0	1.9	0.0	4.0	11.0	1.9	0.0	4.0	11.0	1.9	0.0	4.0	11.0	1.9	0.0	4.0	11.0	1.9	0.0	4.0	11.0	1.9	0.0	5.0	9.0	2.28	2.0	5.0	9.0	2.28	2.0	4.0
163	4.0	11.0	1.9	0.0	5.0	9.0	2.28	2.0	4.0	11.0	1.9	0.0	4.0	11.0	1.9	0.0	4.0	11.0	1.9	0.0	4.0	11.0	1.9	0.0	5.0	9.0	2.28	2.0	4.0	11.0	1.9	0.0	4.0	11.0	1.9	0.0	4.0	11.0	1.9	0.0	4.0	11.0	1.9	0.0	4.0	11.0	1.9	0.0	5.0
164	4.0	11.0	1.9	0.0	4.0	11.0	1.9	0.0	4.0	11.0	1.9	0.0	4.0	11.0	1.9	0.0	4.0	11.0	1.9	0.0	4.0	11.0	1.9	0.0	4.0	11.0	1.9	0.0	4.0	11.0	1.9	0.0	4.0	11.0	1.9	0.0	4.0	11.0	1.9	0.0	5.0	9.0	2.28	2.0	4.0	11.0	1.9	0.0	4.0
165	4.0	11.0	1.9	0.0	4.0	11.0	1.9	0.0	4.0	11.0	1.9	0.0	4.0	11.0	1.9	0.0	4.0	11.0	1.9	0.0	5.0	9.0	2.28	2.0	4.0	11.0	1.9	0.0	4.0	11.0	1.9	0.0	5.0	9.0	2.28	2.0	4.0	11.0	1.9	0.0	4.0	11.0	1.9	0.0	4.0	11.0	1.9	0.0	5.0
166	5.0	9.0	2.28	2.0	4.0	11.0	1.9	0.0	5.0	9.0	2.28	2.0	4.0	11.0	1.9	0.0	4.0	11.0	1.9	0.0	4.0	11.0	1.9	0.0	4.0	11.0	1.9	0.0	4.0	11.0	1.9	0.0	4.0	11.0	1.9	0.0	5.0	9.0	2.28	2.0	4.0	11.0	1.9	0.0	4.0	11.0	1.9	0.0	4.0
167	4.0	11.0	1.9	0.0	4.0	11.0	1.9	0.0	4.0	11.0	1.9	0.0	5.0	9.0	2.28	2.0	4.0	11.0	1.9	0.0	4.0	11.0	1.9	0.0	4.0	11.0	1.9	0.0	4.0	11.0	1.9	0.0	4.0	11.0	1.9	0.0	4.0	11.0	1.9	0.0	5.0	9.0	2.28	2.0	4.0	11.0	1.9	0.0	4.0
168	5.0	9.0	2.28	2.0	4.0	11.0	1.9	0.0	4.0	11.0	1.9	0.0	4.0	11.0	1.9	0.0	5.0	9.0	2.28	2.0	4.0	11.0	1.9	0.0	5.0	9.0	2.28	2.0	4.0	11.0	1.9	0.0	4.0	11.0	1.9	0.0	4.0	11.0	1.9	0.0	5.0	9.0	2.28	2.0	5.0	9.0	2.28	2.0	5.0
169	5.0	9.0	2.28	2.0	4.0	11.0	1.9	0.0	4.0	11.0	1.9	0.0	4.0	11.0	1.9	0.0	5.0	9.0	2.28	2.0	4.0	11.0	1.9	0.0	4.0	11.0	1.9	0.0	4.0	11.0	1.9	0.0	4.0	11.0	1.9	0.0	5.0	9.0	2.28	2.0	4.0	11.0	1.9	0.0	5.0	9.0	2.28	2.0	5.0
170	4.0	11.0	1.9	0.0	4.0	11.0	1.9	0.0	4.0	11.0	1.9	0.0	4.0	11.0	1.9	0.0	5.0	9.0	2.28	2.0	4.0	11.0	1.9	0.0	4.0	11.0	1.9	0.0	4.0	11.0	1.9	0.0	4.0	11.0	1.9	0.0	4.0	11.0	1.9	0.0	4.0	11.0	1.9	0.0	4.0	11.0	1.9	0.0	4.0
171	4.0	11.0	1.9	0.0	4.0	11.0	1.9	0.0	4.0	11.0	1.9	0.0	4.0	11.0	1.9	0.0	4.0	11.0	1.9	0.0	4.0	11.0	1.9	0.0	4.0	11.0	1.9	0.0	4.0	11.0	1.9	0.0	4.0	11.0	1.9	0.0	5.0	9.0	2.28	2.0	4.0	11.0	1.9	0.0	5.0	9.0	2.28	2.0	4.0
172	5.0	9.0	2.28	2.0	4.0	11.0	1.9	0.0	4.0	11.0	1.9	0.0	4.0	11.0	1.9	0.0	5.0	9.0	2.28	2.0	4.0	11.0	1.9	0.0	4.0	11.0	1.9	0.0	4.0	11.0	1.9	0.0	4.0	11.0	1.9	0.0	4.0	11.0	1.9	0.0	4.0	11.0	1.9	0.0	4.0	11.0	1.9	0.0	5.0
173	4.0	11.0	1.9	0.0	5.0	9.0	2.28	2.0	5.0	9.0	2.28	2.0	5.0	9.0	2.28	2.0	5.0	9.0	2.28	2.0	4.0	11.0	1.9	0.0	4.0	11.0	1.9	0.0	4.0	11.0	1.9	0.0	4.0	11.0	1.9	0.0	4.0	11.0	1.9	0.0	4.0	11.0	1.9	0.0	5.0	9.0	2.28	2.0	4.0
174	4.0	11.0	1.9	0.0	4.0	11.0	1.9	0.0	4.0	11.0	1.9	0.0	4.0	11.0	1.9	0.0	4.0	11.0	1.9	0.0	4.0	11.0	1.9	0.0	4.0	11.0	1.9	0.0	5.0	9.0	2.28	2.0	4.0	11.0	1.9	0.0	4.0	11.0	1.9	0.0	4.0	11.0	1.9	0.0	4.0	11.0	1.9	0.0	4.0
175	4.0	11.0	1.9	0.0	4.0	11.0	1.9	0.0	4.0	11.0	1.9	0.0	4.0	11.0	1.9	0.0	4.0	11.0	1.9	0.0	5.0	9.0	2.28	2.0	4.0	11.0	1.9	0.0	4.0	11.0	1.9	0.0	4.0	11.0	1.9	0.0	5.0	9.0	2.28	2.0	4.0	11.0	1.9	0.0	4.0	11.0	1.9	0.0	4.0
176	4.0	11.0	1.9	0.0	4.0	11.0	1.9	0.0	4.0	11.0	1.9	0.0	4.0	11.0	1.9	0.0	5.0	9.0	2.28	2.0	4.0	11.0	1.9	0.0	5.0	9.0	2.28	2.0	4.0	11.0	1.9	0.0	4.0	11.0	1.9	0.0	4.0	11.0	1.9	0.0	4.0	11.0	1.9	0.0	4.0	11.0	1.9	0.0	4.0
177	4.0	11.0	1.9	0.0	4.0	11.0	1.9	0.0	4.0	11.0	1.9	0.0	4.0	11.0	1.9	0.0	4.0	11.0	1.9	0.0	4.0	11.0	1.9	0.0	4.0	11.0	1.9	0.0	4.0	11.0	1.9	0.0	4.0	11.0	1.9	0.0	5.0	9.0	2.28	2.0	5.0	9.0	2.28	2.0	5.0	9.0	2.28	2.0	4.0
178	4.0	11.0	1.9	0.0	4.0	11.0	1.9	0.0	4.0	11.0	1.9	0.0	4.0	11.0	1.9	0.0	4.0	11.0	1.9	0.0	4.0	11.0	1.9	0.0	4.0	11.0	1.9	0.0	4.0	11.0	1.9	0.0	5.0	9.0	2.28	2.0	5.0	9.0	2.28	2.0	4.0	11.0	1.9	0.0	4.0	11.0	1.9	0.0	5.0
179	4.0	11.0	1.9	0.0	4.0	11.0	1.9	0.0	4.0	11.0	1.9	0.0	4.0	11.0	1.9	0.0	4.0	11.0	1.9	0.0	4.0	11.0	1.9	0.0	4.0	11.0	1.9	0.0	5.0	9.0	2.28	2.0	4.0	11.0	1.9	0.0	4.0	11.0	1.9	0.0	4.0	11.0	1.9	0.0	5.0	9.0	2.28	2.0	4.0
180	4.0	11.0	1.9	0.0	4.0	11.0	1.9	0.0	4.0	11.0	1.9	0.0	5.0	9.0	2.28	2.0	4.0	11.0	1.9	0.0	5.0	9.0	2.28	2.0	4.0	11.0	1.9	0.0	4.0	11.0	1.9	0.0	4.0	11.0	1.9	0.0	5.0	9.0	2.28	2.0	4.0	11.0	1.9	0.0	4.0	11.0	1.9	0.0	4.0
181	4.0	11.0	1.9	0.0	4.0	11.0	1.9	0.0	5.0	9.0	2.28	2.0	4.0	11.0	1.9	0.0	4.0	11.0	1.9	0.0	5.0	9.0	2.28	2.0	4.0	11.0	1.9	0.0	4.0	11.0	1.9	0.0	4.0	11.0	1.9	0.0	5.0	9.0	2.28	2.0	4.0	11.0	1.9	0.0	4.0	11.0	1.9	0.0	4.0
182	5.0	9.0	2.28	2.0	4.0	11.0	1.9	0.0	4.0	11.0	1.9	0.0	4.0	11.0	1.9	0.0	4.0	11.0	1.9	0.0	5.0	9.0	2.28	2.0	4.0	11.0	1.9	0.0	5.0	9.0	2.28	2.0	5.0	9.0	2.28	2.0	4.0	11.0	1.9	0.0	4.0	11.0	1.9	0.0	4.0	11.0	1.9	0.0	4.0
183	4.0	11.0	1.9	0.0	4.0	11.0	1.9	0.0	4.0	11.0	1.9	0.0	5.0	9.0	2.28	2.0	5.0	9.0	2.28	2.0	4.0	11.0	1.9	0.0	4.0	11.0	1.9	0.0	4.0	11.0	1.9	0.0	4.0	11.0	1.9	0.0	4.0	11.0	1.9	0.0	4.0	11.0	1.9	0.0	4.0	11.0	1.9	0.0	4.0
184	4.0	11.0	1.9	0.0	4.0	11.0	1.9	0.0	4.0	11.0	1.9	0.0	4.0	11.0	1.9	0.0	4.0	11.0	1.9	0.0	4.0	11.0	1.9	0.0	5.0	9.0	2.28	2.0	4.0	11.0	1.9	0.0	4.0	11.0	1.9	0.0	4.0	11.0	1.9	0.0	5.0	9.0	2.28	2.0	4.0	11.0	1.9	0.0	5.0
185	5.0	9.0	2.28	2.0	4.0	11.0	1.9	0.0	4.0	11.0	1.9	0.0	5.0	9.0	2.28	2.0	4.0	11.0	1.9	0.0	4.0	11.0	1.9	0.0	4.0	11.0	1.9	0.0	4.0	11.0	1.9	0.0	4.0	11.0	1.9	0.0	5.0	9.0	2.28	2.0	4.0	11.0	1.9	0.0	4.0	11.0	1.9	0.0	5.0
186	4.0	11.0	1.9	0.0	4.0	11.0	1.9	0.0	4.0	11.0	1.9	0.0	4.0	11.0	1.9	0.0	5.0	9.0	2.28	2.0	4.0	11.0	1.9	0.0	5.0	9.0	2.28	2.0	4.0	11.0	1.9	0.0	5.0	9.0	2.28	2.0	4.0	11.0	1.9	0.0	4.0	11.0	1.9	0.0	4.0	11.0	1.9	0.0	4.0
187	4.0	11.0	1.9	0.0	4.0	11.0	1.9	0.0	4.0	11.0	1.9	0.0	4.0	11.0	1.9	0.0	5.0	9.0	2.28	2.0	5.0	9.0	2.28	2.0	4.0	11.0	1.9	0.0	4.0	11.0	1.9	0.0	4.0	11.0	1.9	0.0	4.0	11.0	1.9	0.0	4.0	11.0	1.9	0.0	4.0	11.0	1.9	0.0	4.0
188	5.0	9.0	2.28	2.0	4.0	11.0	1.9	0.0	4.0	11.0	1.9	0.0	5.0	9.0	2.28	2.0	4.0	11.0	1.9	0.0	4.0	11.0	1.9	0.0	5.0	9.0	2.28	2.0	4.0	11.0	1.9	0.0	4.0	11.0	1.9	0.0	4.0	11.0	1.9	0.0	4.0	11.0	1.9	0.0	5.0	9.0	2.28	2.0	4.0
189	5.0	9.0	2.28	2.0	5.0	9.0	2.28	2.0	4.0	11.0	1.9	0.0	4.0	11.0	1.9	0.0	4.0	11.0	1.9	0.0	4.0	11.0	1.9	0.0	4.0	11.0	1.9	0.0	5.0	9.0	2.28	2.0	4.0	11.0	1.9	0.0	4.0	11.0	1.9	0.0	4.0	11.0	1.9	0.0	4.0	11.0	1.9	0.0	4.0
190	4.0	11.0	1.9	0.0	5.0	9.0	2.28	2.0	4.0	11.0	1.9	0.0	4.0	11.0	1.9	0.0	4.0	11.0	1.9	0.0	4.0	11.0	1.9	0.0	4.0	11.0	1.9	0.0	4.0	11.0	1.9	0.0	4.0	11.0	1.9	0.0	4.0	11.0	1.9	0.0	4.0	11.0	1.9	0.0	5.0	9.0	2.28	2.0	4.0
191	4.0	11.0	1.9	0.0	5.0	9.0	2.28	2.0	4.0	11.0	1.9	0.0	4.0	11.0	1.9	0.0	5.0	9.0	2.28	2.0	4.0	11.0	1.9	0.0	4.0	11.0	1.9	0.0	4.0	11.0	1.9	0.0	4.0	11.0	1.9	0.0	4.0	11.0	1.9	0.0	5.0	9.0	2.28	2.0	4.0	11.0	1.9	0.0	4.0
192	5.0	9.0	2.28	2.0	5.0	9.0	2.28	2.0	4.0	11.0	1.9	0.0	4.0	11.0	1.9	0.0	4.0	11.0	1.9	0.0	4.0	11.0	1.9	0.0	4.0	11.0	1.9	0.0	4.0	11.0	1.9	0.0	4.0	11.0	1.9	0.0	4.0	11.0	1.9	0.0	4.0	11.0	1.9	0.0	5.0	9.0	2.28	2.0	5.0
193	4.0	11.0	1.9	0.0	4.0	11.0	1.9	0.0	4.0	11.0	1.9	0.0	4.0	11.0	1.9	0.0	4.0	11.0	1.9	0.0	4.0	11.0	1.9	0.0	5.0	9.0	2.28	2.0	4.0	11.0	1.9	0.0	4.0	11.0	1.9	0.0	4.0	11.0	1.9	0.0	4.0	11.0	1.9	0.0	5.0	9.0	2.28	2.0	5.0
194	5.0	9.0	2.28	2.0	4.0	11.0	1.9	0.0	4.0	11.0	1.9	0.0	5.0	9.0	2.28	2.0	4.0	11.0	1.9	0.0	4.0	11.0	1.9	0.0	4.0	11.0	1.9	0.0	4.0	11.0	1.9	0.0	4.0	11.0	1.9	0.0	5.0	9.0	2.28	2.0	4.0	11.0	1.9	0.0	4.0	11.0	1.9	0.0	4.0
195	4.0	11.0	1.9	0.0	4.0	11.0	1.9	0.0	5.0	9.0	2.28	2.0	4.0	11.0	1.9	0.0	4.0	11.0	1.9	0.0	4.0	11.0	1.9	0.0	5.0	9.0	2.28	2.0	4.0	11.0	1.9	0.0	4.0	11.0	1.9	0.0	4.0	11.0	1.9	0.0	4.0	11.0	1.9	0.0	4.0	11.0	1.9	0.0	4.0
196	4.0	11.0	1.9	0.0	5.0	9.0	2.28	2.0	4.0	11.0	1.9	0.0	4.0	11.0	1.9	0.0	5.0	9.0	2.28	2.0	5.0	9.0	2.28	2.0	4.0	11.0	1.9	0.0	4.0	11.0	1.9	0.0	4.0	11.0	1.9	0.0	4.0	11.0	1.9	0.0	5.0	9.0	2.28	2.0	4.0	11.0	1.9	0.0	5.0
197	4.0	11.0	1.9	0.0	4.0	11.0	1.9	0.0	5.0	9.0	2.28	2.0	5.0	9.0	2.28	2.0	4.0	11.0	1.9	0.0	5.0	9.0	2.28	2.0	4.0	11.0	1.9	0.0	4.0	11.0	1.9	0.0	4.0	11.0	1.9	0.0	4.0	11.0	1.9	0.0	4.0	11.0	1.9	0.0	4.0	11.0	1.9	0.0	4.0
198	4.0	11.0	1.9	0.0	5.0	9.0	2.28	2.0	5.0	9.0	2.28	2.0	5.0	9.0	2.28	2.0	5.0	9.0	2.28	2.0	4.0	11.0	1.9	0.0	4.0	11.0	1.9	0.0	5.0	9.0	2.28	2.0	4.0	11.0	1.9	0.0	4.0	11.0	1.9	0.0	4.0	11.0	1.9	0.0	4.0	11.0	1.9	0.0	4.0
199	4.0	11.0	1.9	0.0	4.0	11.0	1.9	0.0	4.0	11.0	1.9	0.0	5.0	9.0	2.28	2.0	4.0	11.0	1.9	0.0	4.0	11.0	1.9	0.0	5.0	9.0	2.28	2.0	4.0	11.0	1.9	0.0	5.0	9.0	2.28	2.0	4.0	11.0	1.9	0.0	4.0	11.0	1.9	0.0	4.0	11.0	1.9	0.0	4.0
200	4.0	11.0	1.9	0.0	4.0	11.0	1.9	0.0	4.0	11.0	1.9	0.0	4.0	11.0	1.9	0.0	4.0	11.0	1.9	0.0	4.0	11.0	1.9	0.0	5.0	9.0	2.28	2.0	5.0	9.0	2.28	2.0	4.0	11.0	1.9	0.0	5.0	9.0	2.28	2.0	4.0	11.0	1.9	0.0	4.0	11.0	1.9	0.0	4.0
201	4.0	11.0	1.9	0.0	4.0	11.0	1.9	0.0	4.0	11.0	1.9	0.0	4.0	11.0	1.9	0.0	4.0	11.0	1.9	0.0	4.0	11.0	1.9	0.0	4.0	11.0	1.9	0.0	4.0	11.0	1.9	0.0	4.0	11.0	1.9	0.0	4.0	11.0	1.9	0.0	4.0	11.0	1.9	0.0	5.0	9.0	2.28	2.0	4.0
202	5.0	9.0	2.28	2.0	4.0	11.0	1.9	0.0	4.0	11.0	1.9	0.0	4.0	11.0	1.9	0.0	5.0	9.0	2.28	2.0	4.0	11.0	1.9	0.0	4.0	11.0	1.9	0.0	4.0	11.0	1.9	0.0	5.0	9.0	2.28	2.0	4.0	11.0	1.9	0.0	4.0	11.0	1.9	0.0	4.0	11.0	1.9	0.0	4.0
203	4.0	11.0	1.9	0.0	5.0	9.0	2.28	2.0	4.0	11.0	1.9	0.0	4.0	11.0	1.9	0.0	4.0	11.0	1.9	0.0	4.0	11.0	1.9	0.0	5.0	9.0	2.28	2.0	4.0	11.0	1.9	0.0	4.0	11.0	1.9	0.0	4.0	11.0	1.9	0.0	5.0	9.0	2.28	2.0	4.0	11.0	1.9	0.0	4.0
204	4.0	11.0	1.9	0.0	4.0	11.0	1.9	0.0	4.0	11.0	1.9	0.0	5.0	9.0	2.28	2.0	4.0	11.0	1.9	0.0	5.0	9.0	2.28	2.0	4.0	11.0	1.9	0.0	4.0	11.0	1.9	0.0	4.0	11.0	1.9	0.0	5.0	9.0	2.28	2.0	4.0	11.0	1.9	0.0	5.0	9.0	2.28	2.0	4.0
205	5.0	9.0	2.28	2.0	4.0	11.0	1.9	0.0	5.0	9.0	2.28	2.0	5.0	9.0	2.28	2.0	4.0	11.0	1.9	0.0	5.0	9.0	2.28	2.0	4.0	11.0	1.9	0.0	4.0	11.0	1.9	0.0	4.0	11.0	1.9	0.0	4.0	11.0	1.9	0.0	5.0	9.0	2.28	2.0	4.0	11.0	1.9	0.0	4.0
206	4.0	11.0	1.9	0.0	5.0	9.0	2.28	2.0	4.0	11.0	1.9	0.0	4.0	11.0	1.9	0.0	4.0	11.0	1.9	0.0	5.0	9.0	2.28	2.0	5.0	9.0	2.28	2.0	4.0	11.0	1.9	0.0	4.0	11.0	1.9	0.0	4.0	11.0	1.9	0.0	4.0	11.0	1.9	0.0	4.0	11.0	1.9	0.0	4.0
207	4.0	11.0	1.9	0.0	4.0	11.0	1.9	0.0	4.0	11.0	1.9	0.0	4.0	11.0	1.9	0.0	5.0	9.0	2.28	2.0	4.0	11.0	1.9	0.0	4.0	11.0	1.9	0.0	5.0	9.0	2.28	2.0	4.0	11.0	1.9	0.0	4.0	11.0	1.9	0.0	4.0	11.0	1.9	0.0	4.0	11.0	1.9	0.0	4.0
208	5.0	9.0	2.28	2.0	4.0	11.0	1.9	0.0	4.0	11.0	1.9	0.0	4.0	11.0	1.9	0.0	4.0	11.0	1.9	0.0	5.0	9.0	2.28	2.0	4.0	11.0	1.9	0.0	4.0	11.0	1.9	0.0	4.0	11.0	1.9	0.0	5.0	9.0	2.28	2.0	4.0	11.0	1.9	0.0	4.0	11.0	1.9	0.0	4.0
209	4.0	11.0	1.9	0.0	4.0	11.0	1.9	0.0	4.0	11.0	1.9	0.0	4.0	11.0	1.9	0.0	4.0	11.0	1.9	0.0	5.0	9.0	2.28	2.0	4.0	11.0	1.9	0.0	4.0	11.0	1.9	0.0	4.0	11.0	1.9	0.0	4.0	11.0	1.9	0.0	4.0	11.0	1.9	0.0	4.0	11.0	1.9	0.0	4.0
210	4.0	11.0	1.9	0.0	4.0	11.0	1.9	0.0	5.0	9.0	2.28	2.0	5.0	9.0	2.28	2.0	4.0	11.0	1.9	0.0	4.0	11.0	1.9	0.0	4.0	11.0	1.9	0.0	4.0	11.0	1.9	0.0	4.0	11.0	1.9	0.0	4.0	11.0	1.9	0.0	4.0	11.0	1.9	0.0	4.0	11.0	1.9	0.0	4.0
211	4.0	11.0	1.9	0.0	5.0	9.0	2.28	2.0	4.0	11.0	1.9	0.0	5.0	9.0	2.28	2.0	4.0	11.0	1.9	0.0	4.0	11.0	1.9	0.0	5.0	9.0	2.28	2.0	5.0	9.0	2.28	2.0	4.0	11.0	1.9	0.0	4.0	11.0	1.9	0.0	4.0	11.0	1.9	0.0	5.0	9.0	2.28	2.0	4.0
212	4.0	11.0	1.9	0.0	4.0	11.0	1.9	0.0	5.0	9.0	2.28	2.0	4.0	11.0	1.9	0.0	4.0	11.0	1.9	0.0	4.0	11.0	1.9	0.0	5.0	9.0	2.28	2.0	4.0	11.0	1.9	0.0	4.0	11.0	1.9	0.0	4.0	11.0	1.9	0.0	4.0	11.0	1.9	0.0	4.0	11.0	1.9	0.0	5.0
213	4.0	11.0	1.9	0.0	4.0	11.0	1.9	0.0	4.0	11.0	1.9	0.0	4.0	11.0	1.9	0.0	5.0	9.0	2.28	2.0	4.0	11.0	1.9	0.0	5.0	9.0	2.28	2.0	4.0	11.0	1.9	0.0	4.0	11.0	1.9	0.0	4.0	11.0	1.9	0.0	4.0	11.0	1.9	0.0	4.0	11.0	1.9	0.0	5.0
214	4.0	11.0	1.9	0.0	4.0	11.0	1.9	0.0	4.0	11.0	1.9	0.0	4.0	11.0	1.9	0.0	5.0	9.0	2.28	2.0	4.0	11.0	1.9	0.0	5.0	9.0	2.28	2.0	4.0	11.0	1.9	0.0	4.0	11.0	1.9	0.0	5.0	9.0	2.28	2.0	4.0	11.0	1.9	0.0	5.0	9.0	2.28	2.0	4.0
215	4.0	11.0	1.9	0.0	4.0	11.0	1.9	0.0	4.0	11.0	1.9	0.0	4.0	11.0	1.9	0.0	4.0	11.0	1.9	0.0	4.0	11.0	1.9	0.0	4.0	11.0	1.9	0.0	4.0	11.0	1.9	0.0	4.0	11.0	1.9	0.0	5.0	9.0	2.28	2.0	5.0	9.0	2.28	2.0	4.0	11.0	1.9	0.0	4.0
216	5.0	9.0	2.28	2.0	4.0	11.0	1.9	0.0	4.0	11.0	1.9	0.0	4.0	11.0	1.9	0.0	4.0	11.0	1.9	0.0	5.0	9.0	2.28	2.0	4.0	11.0	1.9	0.0	5.0	9.0	2.28	2.0	4.0	11.0	1.9	0.0	5.0	9.0	2.28	2.0	5.0	9.0	2.28	2.0	5.0	9.0	2.28	2.0	4.0
217	4.0	11.0	1.9	0.0	5.0	9.0	2.28	2.0	4.0	11.0	1.9	0.0	4.0	11.0	1.9	0.0	5.0	9.0	2.28	2.0	4.0	11.0	1.9	0.0	5.0	9.0	2.28	2.0	5.0	9.0	2.28	2.0	4.0	11.0	1.9	0.0	4.0	11.0	1.9	0.0	4.0	11.0	1.9	0.0	5.0	9.0	2.28	2.0	4.0
218	4.0	11.0	1.9	0.0	5.0	9.0	2.28	2.0	5.0	9.0	2.28	2.0	4.0	11.0	1.9	0.0	4.0	11.0	1.9	0.0	5.0	9.0	2.28	2.0	4.0	11.0	1.9	0.0	5.0	9.0	2.28	2.0	4.0	11.0	1.9	0.0	4.0	11.0	1.9	0.0	5.0	9.0	2.28	2.0	5.0	9.0	2.28	2.0	4.0
219	5.0	9.0	2.28	2.0	4.0	11.0	1.9	0.0	5.0	9.0	2.28	2.0	4.0	11.0	1.9	0.0	4.0	11.0	1.9	0.0	4.0	11.0	1.9	0.0	4.0	11.0	1.9	0.0	4.0	11.0	1.9	0.0	5.0	9.0	2.28	2.0	4.0	11.0	1.9	0.0	4.0	11.0	1.9	0.0	4.0	11.0	1.9	0.0	4.0
220	5.0	9.0	2.28	2.0	4.0	11.0	1.9	0.0	4.0	11.0	1.9	0.0	5.0	9.0	2.28	2.0	4.0	11.0	1.9	0.0	5.0	9.0	2.28	2.0	4.0	11.0	1.9	0.0	4.0	11.0	1.9	0.0	4.0	11.0	1.9	0.0	4.0	11.0	1.9	0.0	4.0	11.0	1.9	0.0	4.0	11.0	1.9	0.0	4.0
221	4.0	11.0	1.9	0.0	4.0	11.0	1.9	0.0	5.0	9.0	2.28	2.0	4.0	11.0	1.9	0.0	4.0	11.0	1.9	0.0	4.0	11.0	1.9	0.0	4.0	11.0	1.9	0.0	4.0	11.0	1.9	0.0	4.0	11.0	1.9	0.0	5.0	9.0	2.28	2.0	5.0	9.0	2.28	2.0	4.0	11.0	1.9	0.0	4.0
222	4.0	11.0	1.9	0.0	4.0	11.0	1.9	0.0	4.0	11.0	1.9	0.0	4.0	11.0	1.9	0.0	4.0	11.0	1.9	0.0	4.0	11.0	1.9	0.0	5.0	9.0	2.28	2.0	4.0	11.0	1.9	0.0	5.0	9.0	2.28	2.0	4.0	11.0	1.9	0.0	4.0	11.0	1.9	0.0	4.0	11.0	1.9	0.0	5.0
223	4.0	11.0	1.9	0.0	4.0	11.0	1.9	0.0	4.0	11.0	1.9	0.0	4.0	11.0	1.9	0.0	4.0	11.0	1.9	0.0	4.0	11.0	1.9	0.0	5.0	9.0	2.28	2.0	4.0	11.0	1.9	0.0	4.0	11.0	1.9	0.0	5.0	9.0	2.28	2.0	4.0	11.0	1.9	0.0	5.0	9.0	2.28	2.0	4.0
224	4.0	11.0	1.9	0.0	4.0	11.0	1.9	0.0	5.0	9.0	2.28	2.0	4.0	11.0	1.9	0.0	5.0	9.0	2.28	2.0	4.0	11.0	1.9	0.0	4.0	11.0	1.9	0.0	4.0	11.0	1.9	0.0	5.0	9.0	2.28	2.0	4.0	11.0	1.9	0.0	4.0	11.0	1.9	0.0	4.0	11.0	1.9	0.0	4.0
225	4.0	11.0	1.9	0.0	4.0	11.0	1.9	0.0	4.0	11.0	1.9	0.0	5.0	9.0	2.28	2.0	4.0	11.0	1.9	0.0	4.0	11.0	1.9	0.0	5.0	9.0	2.28	2.0	4.0	11.0	1.9	0.0	4.0	11.0	1.9	0.0	4.0	11.0	1.9	0.0	4.0	11.0	1.9	0.0	5.0	9.0	2.28	2.0	5.0
226	4.0	11.0	1.9	0.0	4.0	11.0	1.9	0.0	5.0	9.0	2.28	2.0	4.0	11.0	1.9	0.0	5.0	9.0	2.28	2.0	4.0	11.0	1.9	0.0	4.0	11.0	1.9	0.0	4.0	11.0	1.9	0.0	4.0	11.0	1.9	0.0	4.0	11.0	1.9	0.0	4.0	11.0	1.9	0.0	4.0	11.0	1.9	0.0	5.0
227	4.0	11.0	1.9	0.0	4.0	11.0	1.9	0.0	4.0	11.0	1.9	0.0	5.0	9.0	2.28	2.0	5.0	9.0	2.28	2.0	4.0	11.0	1.9	0.0	4.0	11.0	1.9	0.0	4.0	11.0	1.9	0.0	4.0	11.0	1.9	0.0	4.0	11.0	1.9	0.0	5.0	9.0	2.28	2.0	4.0	11.0	1.9	0.0	4.0
228	4.0	11.0	1.9	0.0	4.0	11.0	1.9	0.0	4.0	11.0	1.9	0.0	5.0	9.0	2.28	2.0	4.0	11.0	1.9	0.0	4.0	11.0	1.9	0.0	5.0	9.0	2.28	2.0	5.0	9.0	2.28	2.0	4.0	11.0	1.9	0.0	4.0	11.0	1.9	0.0	4.0	11.0	1.9	0.0	4.0	11.0	1.9	0.0	4.0
229	4.0	11.0	1.9	0.0	4.0	11.0	1.9	0.0	4.0	11.0	1.9	0.0	4.0	11.0	1.9	0.0	4.0	11.0	1.9	0.0	5.0	9.0	2.28	2.0	4.0	11.0	1.9	0.0	4.0	11.0	1.9	0.0	4.0	11.0	1.9	0.0	5.0	9.0	2.28	2.0	4.0	11.0	1.9	0.0	5.0	9.0	2.28	2.0	4.0
230	4.0	11.0	1.9	0.0	5.0	9.0	2.28	2.0	4.0	11.0	1.9	0.0	4.0	11.0	1.9	0.0	4.0	11.0	1.9	0.0	4.0	11.0	1.9	0.0	4.0	11.0	1.9	0.0	4.0	11.0	1.9	0.0	5.0	9.0	2.28	2.0	4.0	11.0	1.9	0.0	4.0	11.0	1.9	0.0	4.0	11.0	1.9	0.0	4.0
231	4.0	11.0	1.9	0.0	4.0	11.0	1.9	0.0	5.0	9.0	2.28	2.0	5.0	9.0	2.28	2.0	4.0	11.0	1.9	0.0	4.0	11.0	1.9	0.0	4.0	11.0	1.9	0.0	4.0	11.0	1.9	0.0	5.0	9.0	2.28	2.0	4.0	11.0	1.9	0.0	5.0	9.0	2.28	2.0	4.0	11.0	1.9	0.0	5.0
232	4.0	11.0	1.9	0.0	5.0	9.0	2.28	2.0	4.0	11.0	1.9	0.0	5.0	9.0	2.28	2.0	4.0	11.0	1.9	0.0	5.0	9.0	2.28	2.0	5.0	9.0	2.28	2.0	4.0	11.0	1.9	0.0	4.0	11.0	1.9	0.0	4.0	11.0	1.9	0.0	4.0	11.0	1.9	0.0	4.0	11.0	1.9	0.0	4.0
233	5.0	9.0	2.28	2.0	4.0	11.0	1.9	0.0	4.0	11.0	1.9	0.0	5.0	9.0	2.28	2.0	5.0	9.0	2.28	2.0	4.0	11.0	1.9	0.0	4.0	11.0	1.9	0.0	4.0	11.0	1.9	0.0	4.0	11.0	1.9	0.0	4.0	11.0	1.9	0.0	4.0	11.0	1.9	0.0	4.0	11.0	1.9	0.0	4.0
234	4.0	11.0	1.9	0.0	4.0	11.0	1.9	0.0	4.0	11.0	1.9	0.0	4.0	11.0	1.9	0.0	4.0	11.0	1.9	0.0	4.0	11.0	1.9	0.0	4.0	11.0	1.9	0.0	4.0	11.0	1.9	0.0	4.0	11.0	1.9	0.0	4.0	11.0	1.9	0.0	4.0	11.0	1.9	0.0	4.0	11.0	1.9	0.0	5.0
235	4.0	11.0	1.9	0.0	4.0	11.0	1.9	0.0	4.0	11.0	1.9	0.0	4.0	11.0	1.9	0.0	5.0	9.0	2.28	2.0	4.0	11.0	1.9	0.0	4.0	11.0	1.9	0.0	4.0	11.0	1.9	0.0	5.0	9.0	2.28	2.0	5.0	9.0	2.28	2.0	4.0	11.0	1.9	0.0	5.0	9.0	2.28	2.0	4.0
236	5.0	9.0	2.28	2.0	4.0	11.0	1.9	0.0	5.0	9.0	2.28	2.0	4.0	11.0	1.9	0.0	5.0	9.0	2.28	2.0	5.0	9.0	2.28	2.0	5.0	9.0	2.28	2.0	4.0	11.0	1.9	0.0	4.0	11.0	1.9	0.0	4.0	11.0	1.9	0.0	4.0	11.0	1.9	0.0	4.0	11.0	1.9	0.0	4.0
237	4.0	11.0	1.9	0.0	4.0	11.0	1.9	0.0	5.0	9.0	2.28	2.0	5.0	9.0	2.28	2.0	4.0	11.0	1.9	0.0	4.0	11.0	1.9	0.0	4.0	11.0	1.9	0.0	4.0	11.0	1.9	0.0	5.0	9.0	2.28	2.0	4.0	11.0	1.9	0.0	5.0	9.0	2.28	2.0	4.0	11.0	1.9	0.0	4.0
238	4.0	11.0	1.9	0.0	5.0	9.0	2.28	2.0	4.0	11.0	1.9	0.0	4.0	11.0	1.9	0.0	5.0	9.0	2.28	2.0	4.0	11.0	1.9	0.0	5.0	9.0	2.28	2.0	4.0	11.0	1.9	0.0	4.0	11.0	1.9	0.0	4.0	11.0	1.9	0.0	4.0	11.0	1.9	0.0	4.0	11.0	1.9	0.0	4.0
239	5.0	9.0	2.28	2.0	4.0	11.0	1.9	0.0	4.0	11.0	1.9	0.0	4.0	11.0	1.9	0.0	4.0	11.0	1.9	0.0	4.0	11.0	1.9	0.0	4.0	11.0	1.9	0.0	4.0	11.0	1.9	0.0	4.0	11.0	1.9	0.0	5.0	9.0	2.28	2.0	4.0	11.0	1.9	0.0	4.0	11.0	1.9	0.0	4.0
240	4.0	11.0	1.9	0.0	4.0	11.0	1.9	0.0	5.0	9.0	2.28	2.0	4.0	11.0	1.9	0.0	4.0	11.0	1.9	0.0	4.0	11.0	1.9	0.0	5.0	9.0	2.28	2.0	5.0	9.0	2.28	2.0	4.0	11.0	1.9	0.0	5.0	9.0	2.28	2.0	4.0	11.0	1.9	0.0	5.0	9.0	2.28	2.0	4.0
241	4.0	11.0	1.9	0.0	5.0	9.0	2.28	2.0	4.0	11.0	1.9	0.0	5.0	9.0	2.28	2.0	4.0	11.0	1.9	0.0	5.0	9.0	2.28	2.0	4.0	11.0	1.9	0.0	4.0	11.0	1.9	0.0	5.0	9.0	2.28	2.0	4.0	11.0	1.9	0.0	4.0	11.0	1.9	0.0	4.0	11.0	1.9	0.0	4.0
242	5.0	9.0	2.28	2.0	5.0	9.0	2.28	2.0	4.0	11.0	1.9	0.0	4.0	11.0	1.9	0.0	4.0	11.0	1.9	0.0	4.0	11.0	1.9	0.0	4.0	11.0	1.9	0.0	5.0	9.0	2.28	2.0	5.0	9.0	2.28	2.0	4.0	11.0	1.9	0.0	4.0	11.0	1.9	0.0	5.0	9.0	2.28	2.0	4.0
243	4.0	11.0	1.9	0.0	4.0	11.0	1.9	0.0	4.0	11.0	1.9	0.0	5.0	9.0	2.28	2.0	4.0	11.0	1.9	0.0	4.0	11.0	1.9	0.0	4.0	11.0	1.9	0.0	4.0	11.0	1.9	0.0	4.0	11.0	1.9	0.0	4.0	11.0	1.9	0.0	4.0	11.0	1.9	0.0	4.0	11.0	1.9	0.0	5.0
244	4.0	11.0	1.9	0.0	4.0	11.0	1.9	0.0	5.0	9.0	2.28	2.0	5.0	9.0	2.28	2.0	4.0	11.0	1.9	0.0	4.0	11.0	1.9	0.0	4.0	11.0	1.9	0.0	4.0	11.0	1.9	0.0	4.0	11.0	1.9	0.0	4.0	11.0	1.9	0.0	4.0	11.0	1.9	0.0	4.0	11.0	1.9	0.0	5.0
245	4.0	11.0	1.9	0.0	4.0	11.0	1.9	0.0	4.0	11.0	1.9	0.0	4.0	11.0	1.9	0.0	4.0	11.0	1.9	0.0	4.0	11.0	1.9	0.0	5.0	9.0	2.28	2.0	4.0	11.0	1.9	0.0	4.0	11.0	1.9	0.0	5.0	9.0	2.28	2.0	5.0	9.0	2.28	2.0	4.0	11.0	1.9	0.0	4.0
246	4.0	11.0	1.9	0.0	4.0	11.0	1.9	0.0	5.0	9.0	2.28	2.0	4.0	11.0	1.9	0.0	4.0	11.0	1.9	0.0	4.0	11.0	1.9	0.0	4.0	11.0	1.9	0.0	5.0	9.0	2.28	2.0	4.0	11.0	1.9	0.0	4.0	11.0	1.9	0.0	4.0	11.0	1.9	0.0	4.0	11.0	1.9	0.0	4.0
247	4.0	11.0	1.9	0.0	4.0	11.0	1.9	0.0	4.0	11.0	1.9	0.0	5.0	9.0	2.28	2.0	4.0	11.0	1.9	0.0	4.0	11.0	1.9	0.0	5.0	9.0	2.28	2.0	4.0	11.0	1.9	0.0	4.0	11.0	1.9	0.0	4.0	11.0	1.9	0.0	4.0	11.0	1.9	0.0	5.0	9.0	2.28	2.0	4.0
248	4.0	11.0	1.9	0.0	4.0	11.0	1.9	0.0	4.0	11.0	1.9	0.0	4.0	11.0	1.9	0.0	4.0	11.0	1.9	0.0	4.0	11.0	1.9	0.0	4.0	11.0	1.9	0.0	4.0	11.0	1.9	0.0	4.0	11.0	1.9	0.0	4.0	11.0	1.9	0.0	4.0	11.0	1.9	0.0	5.0	9.0	2.28	2.0	5.0
249	5.0	9.0	2.28	2.0	5.0	9.0	2.28	2.0	5.0	9.0	2.28	2.0	4.0	11.0	1.9	0.0	5.0	9.0	2.28	2.0	4.0	11.0	1.9	0.0	4.0	11.0	1.9	0.0	4.0	11.0	1.9	0.0	4.0	11.0	1.9	0.0	4.0	11.0	1.9	0.0	4.0	11.0	1.9	0.0	4.0	11.0	1.9	0.0	4.0
250	5.0	9.0	2.28	2.0	5.0	9.0	2.28	2.0	4.0	11.0	1.9	0.0	4.0	11.0	1.9	0.0	4.0	11.0	1.9	0.0	4.0	11.0	1.9	0.0	4.0	11.0	1.9	0.0	4.0	11.0	1.9	0.0	4.0	11.0	1.9	0.0	5.0	9.0	2.28	2.0	4.0	11.0	1.9	0.0	5.0	9.0	2.28	2.0	4.0
251	4.0	11.0	1.9	0.0	4.0	11.0	1.9	0.0	4.0	11.0	1.9	0.0	4.0	11.0	1.9	0.0	4.0	11.0	1.9	0.0	4.0	11.0	1.9	0.0	4.0	11.0	1.9	0.0	4.0	11.0	1.9	0.0	4.0	11.0	1.9	0.0	5.0	9.0	2.28	2.0	4.0	11.0	1.9	0.0	5.0	9.0	2.28	2.0	5.0
252	4.0	11.0	1.9	0.0	5.0	9.0	2.28	2.0	4.0	11.0	1.9	0.0	4.0	11.0	1.9	0.0	4.0	11.0	1.9	0.0	4.0	11.0	1.9	0.0	4.0	11.0	1.9	0.0	4.0	11.0	1.9	0.0	4.0	11.0	1.9	0.0	4.0	11.0	1.9	0.0	4.0	11.0	1.9	0.0	4.0	11.0	1.9	0.0	5.0
253	4.0	11.0	1.9	0.0	4.0	11.0	1.9	0.0	5.0	9.0	2.28	2.0	4.0	11.0	1.9	0.0	5.0	9.0	2.28	2.0	4.0	11.0	1.9	0.0	4.0	11.0	1.9	0.0	4.0	11.0	1.9	0.0	4.0	11.0	1.9	0.0	4.0	11.0	1.9	0.0	5.0	9.0	2.28	2.0	4.0	11.0	1.9	0.0	4.0
254	4.0	11.0	1.9	0.0	4.0	11.0	1.9	0.0	4.0	11.0	1.9	0.0	4.0	11.0	1.9	0.0	4.0	11.0	1.9	0.0	4.0	11.0	1.9	0.0	5.0	9.0	2.28	2.0	4.0	11.0	1.9	0.0	4.0	11.0	1.9	0.0	5.0	9.0	2.28	2.0	4.0	11.0	1.9	0.0	4.0	11.0	1.9	0.0	4.0
255	4.0	11.0	1.9	0.0	5.0	9.0	2.28	2.0	4.0	11.0	1.9	0.0	5.0	9.0	2.28	2.0	4.0	11.0	1.9	0.0	4.0	11.0	1.9	0.0	5.0	9.0	2.28	2.0	4.0	11.0	1.9	0.0	4.0	11.0	1.9	0.0	5.0	9.0	2.28	2.0	4.0	11.0	1.9	0.0	4.0	11.0	1.9	0.0	4.0
256	4.0	11.0	1.9	0.0	5.0	9.0	2.28	2.0	4.0	11.0	1.9	0.0	4.0	11.0	1.9	0.0	4.0	11.0	1.9	0.0	4.0	11.0	1.9	0.0	5.0	9.0	2.28	2.0	4.0	11.0	1.9	0.0	4.0	11.0	1.9	0.0	4.0	11.0	1.9	0.0	4.0	11.0	1.9	0.0	5.0	9.0	2.28	2.0	4.0
257	4.0	11.0	1.9	0.0	4.0	11.0	1.9	0.0	4.0	11.0	1.9	0.0	4.0	11.0	1.9	0.0	4.0	11.0	1.9	0.0	5.0	9.0	2.28	2.0	4.0	11.0	1.9	0.0	5.0	9.0	2.28	2.0	4.0	11.0	1.9	0.0	5.0	9.0	2.28	2.0	5.0	9.0	2.28	2.0	4.0	11.0	1.9	0.0	5.0
258	4.0	11.0	1.9	0.0	5.0	9.0	2.28	2.0	5.0	9.0	2.28	2.0	4.0	11.0	1.9	0.0	5.0	9.0	2.28	2.0	4.0	11.0	1.9	0.0	4.0	11.0	1.9	0.0	4.0	11.0	1.9	0.0	4.0	11.0	1.9	0.0	4.0	11.0	1.9	0.0	5.0	9.0	2.28	2.0	4.0	11.0	1.9	0.0	4.0
259	4.0	11.0	1.9	0.0	4.0	11.0	1.9	0.0	4.0	11.0	1.9	0.0	4.0	11.0	1.9	0.0	5.0	9.0	2.28	2.0	4.0	11.0	1.9	0.0	5.0	9.0	2.28	2.0	5.0	9.0	2.28	2.0	4.0	11.0	1.9	0.0	4.0	11.0	1.9	0.0	4.0	11.0	1.9	0.0	4.0	11.0	1.9	0.0	5.0
260	4.0	11.0	1.9	0.0	5.0	9.0	2.28	2.0	4.0	11.0	1.9	0.0	4.0	11.0	1.9	0.0	4.0	11.0	1.9	0.0	5.0	9.0	2.28	2.0	5.0	9.0	2.28	2.0	4.0	11.0	1.9	0.0	4.0	11.0	1.9	0.0	4.0	11.0	1.9	0.0	4.0	11.0	1.9	0.0	4.0	11.0	1.9	0.0	5.0
261	4.0	11.0	1.9	0.0	4.0	11.0	1.9	0.0	4.0	11.0	1.9	0.0	5.0	9.0	2.28	2.0	5.0	9.0	2.28	2.0	4.0	11.0	1.9	0.0	5.0	9.0	2.28	2.0	4.0	11.0	1.9	0.0	4.0	11.0	1.9	0.0	4.0	11.0	1.9	0.0	4.0	11.0	1.9	0.0	4.0	11.0	1.9	0.0	4.0
262	5.0	9.0	2.28	2.0	4.0	11.0	1.9	0.0	4.0	11.0	1.9	0.0	5.0	9.0	2.28	2.0	4.0	11.0	1.9	0.0	4.0	11.0	1.9	0.0	4.0	11.0	1.9	0.0	4.0	11.0	1.9	0.0	4.0	11.0	1.9	0.0	4.0	11.0	1.9	0.0	4.0	11.0	1.9	0.0	4.0	11.0	1.9	0.0	4.0
263	4.0	11.0	1.9	0.0	4.0	11.0	1.9	0.0	4.0	11.0	1.9	0.0	4.0	11.0	1.9	0.0	4.0	11.0	1.9	0.0	5.0	9.0	2.28	2.0	4.0	11.0	1.9	0.0	4.0	11.0	1.9	0.0	4.0	11.0	1.9	0.0	4.0	11.0	1.9	0.0	5.0	9.0	2.28	2.0	4.0	11.0	1.9	0.0	4.0
264	4.0	11.0	1.9	0.0	4.0	11.0	1.9	0.0	4.0	11.0	1.9	0.0	4.0	11.0	1.9	0.0	4.0	11.0	1.9	0.0	4.0	11.0	1.9	0.0	5.0	9.0	2.28	2.0	4.0	11.0	1.9	0.0	4.0	11.0	1.9	0.0	4.0	11.0	1.9	0.0	5.0	9.0	2.28	2.0	4.0	11.0	1.9	0.0	4.0
265	4.0	11.0	1.9	0.0	4.0	11.0	1.9	0.0	5.0	9.0	2.28	2.0	4.0	11.0	1.9	0.0	5.0	9.0	2.28	2.0	4.0	11.0	1.9	0.0	5.0	9.0	2.28	2.0	4.0	11.0	1.9	0.0	5.0	9.0	2.28	2.0	4.0	11.0	1.9	0.0	5.0	9.0	2.28	2.0	4.0	11.0	1.9	0.0	4.0
266	4.0	11.0	1.9	0.0	4.0	11.0	1.9	0.0	4.0	11.0	1.9	0.0	4.0	11.0	1.9	0.0	4.0	11.0	1.9	0.0	4.0	11.0	1.9	0.0	4.0	11.0	1.9	0.0	5.0	9.0	2.28	2.0	4.0	11.0	1.9	0.0	4.0	11.0	1.9	0.0	5.0	9.0	2.28	2.0	4.0	11.0	1.9	0.0	4.0
267	5.0	9.0	2.28	2.0	4.0	11.0	1.9	0.0	5.0	9.0	2.28	2.0	4.0	11.0	1.9	0.0	4.0	11.0	1.9	0.0	4.0	11.0	1.9	0.0	4.0	11.0	1.9	0.0	4.0	11.0	1.9	0.0	4.0	11.0	1.9	0.0	4.0	11.0	1.9	0.0	4.0	11.0	1.9	0.0	4.0	11.0	1.9	0.0	5.0
268	5.0	9.0	2.28	2.0	5.0	9.0	2.28	2.0	4.0	11.0	1.9	0.0	4.0	11.0	1.9	0.0	4.0	11.0	1.9	0.0	4.0	11.0	1.9	0.0	4.0	11.0	1.9	0.0	4.0	11.0	1.9	0.0	4.0	11.0	1.9	0.0	4.0	11.0	1.9	0.0	5.0	9.0	2.28	2.0	4.0	11.0	1.9	0.0	4.0
269	4.0	11.0	1.9	0.0	4.0	11.0	1.9	0.0	4.0	11.0	1.9	0.0	4.0	11.0	1.9	0.0	5.0	9.0	2.28	2.0	4.0	11.0	1.9	0.0	5.0	9.0	2.28	2.0	5.0	9.0	2.28	2.0	4.0	11.0	1.9	0.0	4.0	11.0	1.9	0.0	4.0	11.0	1.9	0.0	4.0	11.0	1.9	0.0	4.0
270	4.0	11.0	1.9	0.0	5.0	9.0	2.28	2.0	4.0	11.0	1.9	0.0	4.0	11.0	1.9	0.0	4.0	11.0	1.9	0.0	5.0	9.0	2.28	2.0	4.0	11.0	1.9	0.0	4.0	11.0	1.9	0.0	4.0	11.0	1.9	0.0	4.0	11.0	1.9	0.0	4.0	11.0	1.9	0.0	5.0	9.0	2.28	2.0	4.0
271	5.0	9.0	2.28	2.0	4.0	11.0	1.9	0.0	4.0	11.0	1.9	0.0	4.0	11.0	1.9	0.0	4.0	11.0	1.9	0.0	4.0	11.0	1.9	0.0	4.0	11.0	1.9	0.0	4.0	11.0	1.9	0.0	4.0	11.0	1.9	0.0	4.0	11.0	1.9	0.0	4.0	11.0	1.9	0.0	5.0	9.0	2.28	2.0	5.0
272	5.0	9.0	2.28	2.0	5.0	9.0	2.28	2.0	4.0	11.0	1.9	0.0	5.0	9.0	2.28	2.0	4.0	11.0	1.9	0.0	4.0	11.0	1.9	0.0	4.0	11.0	1.9	0.0	4.0	11.0	1.9	0.0	4.0	11.0	1.9	0.0	4.0	11.0	1.9	0.0	4.0	11.0	1.9	0.0	4.0	11.0	1.9	0.0	4.0
273	5.0	9.0	2.28	2.0	5.0	9.0	2.28	2.0	4.0	11.0	1.9	0.0	5.0	9.0	2.28	2.0	4.0	11.0	1.9	0.0	5.0	9.0	2.28	2.0	4.0	11.0	1.9	0.0	4.0	11.0	1.9	0.0	5.0	9.0	2.28	2.0	4.0	11.0	1.9	0.0	4.0	11.0	1.9	0.0	4.0	11.0	1.9	0.0	5.0
274	4.0	11.0	1.9	0.0	4.0	11.0	1.9	0.0	4.0	11.0	1.9	0.0	4.0	11.0	1.9	0.0	4.0	11.0	1.9	0.0	4.0	11.0	1.9	0.0	4.0	11.0	1.9	0.0	4.0	11.0	1.9	0.0	5.0	9.0	2.28	2.0	4.0	11.0	1.9	0.0	4.0	11.0	1.9	0.0	4.0	11.0	1.9	0.0	5.0
275	5.0	9.0	2.28	2.0	5.0	9.0	2.28	2.0	4.0	11.0	1.9	0.0	5.0	9.0	2.28	2.0	4.0	11.0	1.9	0.0	4.0	11.0	1.9	0.0	4.0	11.0	1.9	0.0	4.0	11.0	1.9	0.0	5.0	9.0	2.28	2.0	4.0	11.0	1.9	0.0	4.0	11.0	1.9	0.0	4.0	11.0	1.9	0.0	4.0
276	5.0	9.0	2.28	2.0	4.0	11.0	1.9	0.0	4.0	11.0	1.9	0.0	4.0	11.0	1.9	0.0	4.0	11.0	1.9	0.0	4.0	11.0	1.9	0.0	4.0	11.0	1.9	0.0	4.0	11.0	1.9	0.0	4.0	11.0	1.9	0.0	5.0	9.0	2.28	2.0	4.0	11.0	1.9	0.0	4.0	11.0	1.9	0.0	5.0
277	4.0	11.0	1.9	0.0	5.0	9.0	2.28	2.0	4.0	11.0	1.9	0.0	5.0	9.0	2.28	2.0	4.0	11.0	1.9	0.0	4.0	11.0	1.9	0.0	4.0	11.0	1.9	0.0	4.0	11.0	1.9	0.0	4.0	11.0	1.9	0.0	4.0	11.0	1.9	0.0	4.0	11.0	1.9	0.0	5.0	9.0	2.28	2.0	4.0
278	4.0	11.0	1.9	0.0	4.0	11.0	1.9	0.0	4.0	11.0	1.9	0.0	5.0	9.0	2.28	2.0	5.0	9.0	2.28	2.0	4.0	11.0	1.9	0.0	4.0	11.0	1.9	0.0	4.0	11.0	1.9	0.0	5.0	9.0	2.28	2.0	4.0	11.0	1.9	0.0	4.0	11.0	1.9	0.0	4.0	11.0	1.9	0.0	4.0
279	4.0	11.0	1.9	0.0	5.0	9.0	2.28	2.0	5.0	9.0	2.28	2.0	4.0	11.0	1.9	0.0	5.0	9.0	2.28	2.0	4.0	11.0	1.9	0.0	4.0	11.0	1.9	0.0	5.0	9.0	2.28	2.0	4.0	11.0	1.9	0.0	4.0	11.0	1.9	0.0	5.0	9.0	2.28	2.0	4.0	11.0	1.9	0.0	4.0
280	4.0	11.0	1.9	0.0	4.0	11.0	1.9	0.0	4.0	11.0	1.9	0.0	4.0	11.0	1.9	0.0	5.0	9.0	2.28	2.0	5.0	9.0	2.28	2.0	5.0	9.0	2.28	2.0	4.0	11.0	1.9	0.0	4.0	11.0	1.9	0.0	5.0	9.0	2.28	2.0	5.0	9.0	2.28	2.0	4.0	11.0	1.9	0.0	4.0
281	4.0	11.0	1.9	0.0	5.0	9.0	2.28	2.0	4.0	11.0	1.9	0.0	4.0	11.0	1.9	0.0	4.0	11.0	1.9	0.0	5.0	9.0	2.28	2.0	4.0	11.0	1.9	0.0	4.0	11.0	1.9	0.0	4.0	11.0	1.9	0.0	4.0	11.0	1.9	0.0	5.0	9.0	2.28	2.0	4.0	11.0	1.9	0.0	5.0
282	5.0	9.0	2.28	2.0	4.0	11.0	1.9	0.0	4.0	11.0	1.9	0.0	4.0	11.0	1.9	0.0	4.0	11.0	1.9	0.0	4.0	11.0	1.9	0.0	5.0	9.0	2.28	2.0	4.0	11.0	1.9	0.0	4.0	11.0	1.9	0.0	4.0	11.0	1.9	0.0	4.0	11.0	1.9	0.0	5.0	9.0	2.28	2.0	4.0
283	5.0	9.0	2.28	2.0	4.0	11.0	1.9	0.0	4.0	11.0	1.9	0.0	5.0	9.0	2.28	2.0	4.0	11.0	1.9	0.0	4.0	11.0	1.9	0.0	4.0	11.0	1.9	0.0	4.0	11.0	1.9	0.0	5.0	9.0	2.28	2.0	4.0	11.0	1.9	0.0	4.0	11.0	1.9	0.0	4.0	11.0	1.9	0.0	4.0
284	4.0	11.0	1.9	0.0	4.0	11.0	1.9	0.0	4.0	11.0	1.9	0.0	4.0	11.0	1.9	0.0	4.0	11.0	1.9	0.0	5.0	9.0	2.28	2.0	4.0	11.0	1.9	0.0	5.0	9.0	2.28	2.0	4.0	11.0	1.9	0.0	4.0	11.0	1.9	0.0	4.0	11.0	1.9	0.0	4.0	11.0	1.9	0.0	4.0
285	5.0	9.0	2.28	2.0	4.0	11.0	1.9	0.0	4.0	11.0	1.9	0.0	4.0	11.0	1.9	0.0	4.0	11.0	1.9	0.0	4.0	11.0	1.9	0.0	4.0	11.0	1.9	0.0	4.0	11.0	1.9	0.0	4.0	11.0	1.9	0.0	4.0	11.0	1.9	0.0	4.0	11.0	1.9	0.0	5.0	9.0	2.28	2.0	4.0
286	4.0	11.0	1.9	0.0	4.0	11.0	1.9	0.0	4.0	11.0	1.9	0.0	4.0	11.0	1.9	0.0	5.0	9.0	2.28	2.0	4.0	11.0	1.9	0.0	4.0	11.0	1.9	0.0	4.0	11.0	1.9	0.0	4.0	11.0	1.9	0.0	5.0	9.0	2.28	2.0	4.0	11.0	1.9	0.0	4.0	11.0	1.9	0.0	4.0
287	4.0	11.0	1.9	0.0	5.0	9.0	2.28	2.0	5.0	9.0	2.28	2.0	4.0	11.0	1.9	0.0	4.0	11.0	1.9	0.0	4.0	11.0	1.9	0.0	5.0	9.0	2.28	2.0	4.0	11.0	1.9	0.0	4.0	11.0	1.9	0.0	5.0	9.0	2.28	2.0	4.0	11.0	1.9	0.0	4.0	11.0	1.9	0.0	4.0
288	4.0	11.0	1.9	0.0	4.0	11.0	1.9	0.0	4.0	11.0	1.9	0.0	4.0	11.0	1.9	0.0	5.0	9.0	2.28	2.0	4.0	11.0	1.9	0.0	5.0	9.0	2.28	2.0	5.0	9.0	2.28	2.0	4.0	11.0	1.9	0.0	5.0	9.0	2.28	2.0	4.0	11.0	1.9	0.0	4.0	11.0	1.9	0.0	4.0
289	5.0	9.0	2.28	2.0	4.0	11.0	1.9	0.0	4.0	11.0	1.9	0.0	4.0	11.0	1.9	0.0	4.0	11.0	1.9	0.0	4.0	11.0	1.9	0.0	5.0	9.0	2.28	2.0	4.0	11.0	1.9	0.0	4.0	11.0	1.9	0.0	4.0	11.0	1.9	0.0	5.0	9.0	2.28	2.0	4.0	11.0	1.9	0.0	5.0
290	4.0	11.0	1.9	0.0	4.0	11.0	1.9	0.0	4.0	11.0	1.9	0.0	4.0	11.0	1.9	0.0	4.0	11.0	1.9	0.0	4.0	11.0	1.9	0.0	4.0	11.0	1.9	0.0	5.0	9.0	2.28	2.0	4.0	11.0	1.9	0.0	5.0	9.0	2.28	2.0	4.0	11.0	1.9	0.0	4.0	11.0	1.9	0.0	5.0
291	4.0	11.0	1.9	0.0	4.0	11.0	1.9	0.0	5.0	9.0	2.28	2.0	4.0	11.0	1.9	0.0	4.0	11.0	1.9	0.0	5.0	9.0	2.28	2.0	4.0	11.0	1.9	0.0	4.0	11.0	1.9	0.0	4.0	11.0	1.9	0.0	4.0	11.0	1.9	0.0	4.0	11.0	1.9	0.0	4.0	11.0	1.9	0.0	4.0
292	4.0	11.0	1.9	0.0	4.0	11.0	1.9	0.0	4.0	11.0	1.9	0.0	4.0	11.0	1.9	0.0	4.0	11.0	1.9	0.0	5.0	9.0	2.28	2.0	4.0	11.0	1.9	0.0	4.0	11.0	1.9	0.0	4.0	11.0	1.9	0.0	4.0	11.0	1.9	0.0	4.0	11.0	1.9	0.0	5.0	9.0	2.28	2.0	4.0
293	5.0	9.0	2.28	2.0	5.0	9.0	2.28	2.0	4.0	11.0	1.9	0.0	4.0	11.0	1.9	0.0	5.0	9.0	2.28	2.0	4.0	11.0	1.9	0.0	4.0	11.0	1.9	0.0	5.0	9.0	2.28	2.0	4.0	11.0	1.9	0.0	4.0	11.0	1.9	0.0	5.0	9.0	2.28	2.0	4.0	11.0	1.9	0.0	4.0
294	5.0	9.0	2.28	2.0	4.0	11.0	1.9	0.0	4.0	11.0	1.9	0.0	5.0	9.0	2.28	2.0	4.0	11.0	1.9	0.0	4.0	11.0	1.9	0.0	4.0	11.0	1.9	0.0	4.0	11.0	1.9	0.0	4.0	11.0	1.9	0.0	4.0	11.0	1.9	0.0	4.0	11.0	1.9	0.0	5.0	9.0	2.28	2.0	4.0
295	5.0	9.0	2.28	2.0	5.0	9.0	2.28	2.0	5.0	9.0	2.28	2.0	5.0	9.0	2.28	2.0	4.0	11.0	1.9	0.0	5.0	9.0	2.28	2.0	4.0	11.0	1.9	0.0	4.0	11.0	1.9	0.0	4.0	11.0	1.9	0.0	4.0	11.0	1.9	0.0	5.0	9.0	2.28	2.0	4.0	11.0	1.9	0.0	4.0
296	4.0	11.0	1.9	0.0	4.0	11.0	1.9	0.0	4.0	11.0	1.9	0.0	5.0	9.0	2.28	2.0	5.0	9.0	2.28	2.0	4.0	11.0	1.9	0.0	4.0	11.0	1.9	0.0	5.0	9.0	2.28	2.0	4.0	11.0	1.9	0.0	4.0	11.0	1.9	0.0	4.0	11.0	1.9	0.0	4.0	11.0	1.9	0.0	4.0
297	4.0	11.0	1.9	0.0	4.0	11.0	1.9	0.0	5.0	9.0	2.28	2.0	4.0	11.0	1.9	0.0	4.0	11.0	1.9	0.0	5.0	9.0	2.28	2.0	4.0	11.0	1.9	0.0	4.0	11.0	1.9	0.0	5.0	9.0	2.28	2.0	4.0	11.0	1.9	0.0	4.0	11.0	1.9	0.0	4.0	11.0	1.9	0.0	4.0
298	4.0	11.0	1.9	0.0	4.0	11.0	1.9	0.0	4.0	11.0	1.9	0.0	4.0	11.0	1.9	0.0	4.0	11.0	1.9	0.0	5.0	9.0	2.28	2.0	5.0	9.0	2.28	2.0	4.0	11.0	1.9	0.0	4.0	11.0	1.9	0.0	4.0	11.0	1.9	0.0	4.0	11.0	1.9	0.0	4.0	11.0	1.9	0.0	4.0
299	4.0	11.0	1.9	0.0	4.0	11.0	1.9	0.0	5.0	9.0	2.28	2.0	4.0	11.0	1.9	0.0	4.0	11.0	1.9	0.0	4.0	11.0	1.9	0.0	5.0	9.0	2.28	2.0	4.0	11.0	1.9	0.0	5.0	9.0	2.28	2.0	5.0	9.0	2.28	2.0	5.0	9.0	2.28	2.0	4.0	11.0	1.9	0.0	4.0
300	4.0	11.0	1.9	0.0	5.0	9.0	2.28	2.0	5.0	9.0	2.28	2.0	5.0	9.0	2.28	2.0	5.0	9.0	2.28	2.0	4.0	11.0	1.9	0.0	4.0	11.0	1.9	0.0	4.0	11.0	1.9	0.0	4.0	11.0	1.9	0.0	5.0	9.0	2.28	2.0	4.0	11.0	1.9	0.0	4.0	11.0	1.9	0.0	4.0
301	4.0	11.0	1.9	0.0	4.0	11.0	1.9	0.0	4.0	11.0	1.9	0.0	5.0	9.0	2.28	2.0	4.0	11.0	1.9	0.0	5.0	9.0	2.28	2.0	5.0	9.0	2.28	2.0	5.0	9.0	2.28	2.0	4.0	11.0	1.9	0.0	5.0	9.0	2.28	2.0	4.0	11.0	1.9	0.0	5.0	9.0	2.28	2.0	4.0
302	4.0	11.0	1.9	0.0	4.0	11.0	1.9	0.0	4.0	11.0	1.9	0.0	4.0	11.0	1.9	0.0	4.0	11.0	1.9	0.0	4.0	11.0	1.9	0.0	4.0	11.0	1.9	0.0	4.0	11.0	1.9	0.0	4.0	11.0	1.9	0.0	4.0	11.0	1.9	0.0	5.0	9.0	2.28	2.0	5.0	9.0	2.28	2.0	4.0
303	4.0	11.0	1.9	0.0	5.0	9.0	2.28	2.0	4.0	11.0	1.9	0.0	4.0	11.0	1.9	0.0	5.0	9.0	2.28	2.0	4.0	11.0	1.9	0.0	4.0	11.0	1.9	0.0	4.0	11.0	1.9	0.0	4.0	11.0	1.9	0.0	4.0	11.0	1.9	0.0	4.0	11.0	1.9	0.0	5.0	9.0	2.28	2.0	5.0
304	4.0	11.0	1.9	0.0	4.0	11.0	1.9	0.0	4.0	11.0	1.9	0.0	4.0	11.0	1.9	0.0	5.0	9.0	2.28	2.0	4.0	11.0	1.9	0.0	4.0	11.0	1.9	0.0	4.0	11.0	1.9	0.0	4.0	11.0	1.9	0.0	5.0	9.0	2.28	2.0	5.0	9.0	2.28	2.0	4.0	11.0	1.9	0.0	4.0
305	4.0	11.0	1.9	0.0	5.0	9.0	2.28	2.0	4.0	11.0	1.9	0.0	5.0	9.0	2.28	2.0	4.0	11.0	1.9	0.0	4.0	11.0	1.9	0.0	4.0	11.0	1.9	0.0	4.0	11.0	1.9	0.0	4.0	11.0	1.9	0.0	4.0	11.0	1.9	0.0	4.0	11.0	1.9	0.0	4.0	11.0	1.9	0.0	4.0
306	4.0	11.0	1.9	0.0	4.0	11.0	1.9	0.0	5.0	9.0	2.28	2.0	4.0	11.0	1.9	0.0	5.0	9.0	2.28	2.0	4.0	11.0	1.9	0.0	5.0	9.0	2.28	2.0	4.0	11.0	1.9	0.0	4.0	11.0	1.9	0.0	5.0	9.0	2.28	2.0	4.0	11.0	1.9	0.0	4.0	11.0	1.9	0.0	4.0
307	4.0	11.0	1.9	0.0	5.0	9.0	2.28	2.0	4.0	11.0	1.9	0.0	4.0	11.0	1.9	0.0	4.0	11.0	1.9	0.0	4.0	11.0	1.9	0.0	4.0	11.0	1.9	0.0	4.0	11.0	1.9	0.0	4.0	11.0	1.9	0.0	4.0	11.0	1.9	0.0	5.0	9.0	2.28	2.0	4.0	11.0	1.9	0.0	4.0
308	4.0	11.0	1.9	0.0	5.0	9.0	2.28	2.0	4.0	11.0	1.9	0.0	4.0	11.0	1.9	0.0	4.0	11.0	1.9	0.0	4.0	11.0	1.9	0.0	4.0	11.0	1.9	0.0	4.0	11.0	1.9	0.0	5.0	9.0	2.28	2.0	4.0	11.0	1.9	0.0	4.0	11.0	1.9	0.0	5.0	9.0	2.28	2.0	4.0
309	4.0	11.0	1.9	0.0	4.0	11.0	1.9	0.0	4.0	11.0	1.9	0.0	4.0	11.0	1.9	0.0	4.0	11.0	1.9	0.0	5.0	9.0	2.28	2.0	5.0	9.0	2.28	2.0	4.0	11.0	1.9	0.0	4.0	11.0	1.9	0.0	5.0	9.0	2.28	2.0	4.0	11.0	1.9	0.0	4.0	11.0	1.9	0.0	5.0
310	4.0	11.0	1.9	0.0	4.0	11.0	1.9	0.0	4.0	11.0	1.9	0.0	4.0	11.0	1.9	0.0	5.0	9.0	2.28	2.0	4.0	11.0	1.9	0.0	4.0	11.0	1.9	0.0	4.0	11.0	1.9	0.0	4.0	11.0	1.9	0.0	4.0	11.0	1.9	0.0	5.0	9.0	2.28	2.0	4.0	11.0	1.9	0.0	5.0
311	4.0	11.0	1.9	0.0	4.0	11.0	1.9	0.0	5.0	9.0	2.28	2.0	4.0	11.0	1.9	0.0	4.0	11.0	1.9	0.0	4.0	11.0	1.9	0.0	4.0	11.0	1.9	0.0	5.0	9.0	2.28	2.0	4.0	11.0	1.9	0.0	4.0	11.0	1.9	0.0	5.0	9.0	2.28	2.0	4.0	11.0	1.9	0.0	5.0
312	4.0	11.0	1.9	0.0	5.0	9.0	2.28	2.0	5.0	9.0	2.28	2.0	4.0	11.0	1.9	0.0	4.0	11.0	1.9	0.0	4.0	11.0	1.9	0.0	5.0	9.0	2.28	2.0	4.0	11.0	1.9	0.0	4.0	11.0	1.9	0.0	4.0	11.0	1.9	0.0	4.0	11.0	1.9	0.0	4.0	11.0	1.9	0.0	5.0
313	4.0	11.0	1.9	0.0	4.0	11.0	1.9	0.0	5.0	10.0	2.2	0.0	4.0	11.0	1.9	0.0	4.0	11.0	1.9	0.0	4.0	11.0	1.9	0.0	4.0	11.0	1.9	0.0	4.0	11.0	1.9	0.0	4.0	11.0	1.9	0.0	4.0	11.0	1.9	0.0	4.0	11.0	1.9	0.0	4.0	11.0	1.9	0.0	4.0
314	4.0	11.0	1.9	0.0	5.0	10.0	2.2	0.0	4.0	11.0	1.9	0.0	4.0	11.0	1.9	0.0	5.0	10.0	2.2	0.0	4.0	11.0	1.9	0.0	4.0	11.0	1.9	0.0	4.0	11.0	1.9	0.0	4.0	11.0	1.9	0.0	5.0	10.0	2.2	0.0	4.0	11.0	1.9	0.0	4.0	11.0	1.9	0.0	4.0
315	5.0	10.0	2.2	0.0	4.0	11.0	1.9	0.0	4.0	11.0	1.9	0.0	4.0	11.0	1.9	0.0	4.0	11.0	1.9	0.0	4.0	11.0	1.9	0.0	4.0	11.0	1.9	0.0	4.0	11.0	1.9	0.0	4.0	11.0	1.9	0.0	4.0	11.0	1.9	0.0	4.0	11.0	1.9	0.0	4.0	11.0	1.9	0.0	5.0
316	5.0	10.0	2.2	0.0	4.0	11.0	1.9	0.0	4.0	11.0	1.9	0.0	4.0	11.0	1.9	0.0	5.0	10.0	2.2	0.0	4.0	11.0	1.9	0.0	4.0	11.0	1.9	0.0	5.0	10.0	2.2	0.0	4.0	11.0	1.9	0.0	5.0	10.0	2.2	0.0	5.0	10.0	2.2	0.0	4.0	11.0	1.9	0.0	4.0
317	4.0	11.0	1.9	0.0	5.0	10.0	2.2	0.0	5.0	10.0	2.2	0.0	4.0	11.0	1.9	0.0	4.0	11.0	1.9	0.0	5.0	10.0	2.2	0.0	4.0	11.0	1.9	0.0	4.0	11.0	1.9	0.0	4.0	11.0	1.9	0.0	4.0	11.0	1.9	0.0	4.0	11.0	1.9	0.0	4.0	11.0	1.9	0.0	5.0
318	4.0	11.0	1.9	0.0	4.0	11.0	1.9	0.0	4.0	11.0	1.9	0.0	4.0	11.0	1.9	0.0	4.0	11.0	1.9	0.0	4.0	11.0	1.9	0.0	4.0	11.0	1.9	0.0	4.0	11.0	1.9	0.0	4.0	11.0	1.9	0.0	5.0	10.0	2.2	0.0	4.0	11.0	1.9	0.0	4.0	11.0	1.9	0.0	4.0
319	5.0	10.0	2.2	0.0	4.0	11.0	1.9	0.0	4.0	11.0	1.9	0.0	4.0	11.0	1.9	0.0	5.0	10.0	2.2	0.0	4.0	11.0	1.9	0.0	4.0	11.0	1.9	0.0	5.0	10.0	2.2	0.0	4.0	11.0	1.9	0.0	5.0	10.0	2.2	0.0	4.0	11.0	1.9	0.0	4.0	11.0	1.9	0.0	4.0
320	4.0	11.0	1.9	0.0	5.0	10.0	2.2	0.0	4.0	11.0	1.9	0.0	4.0	11.0	1.9	0.0	4.0	11.0	1.9	0.0	5.0	10.0	2.2	0.0	4.0	11.0	1.9	0.0	4.0	11.0	1.9	0.0	4.0	11.0	1.9	0.0	4.0	11.0	1.9	0.0	5.0	10.0	2.2	0.0	5.0	10.0	2.2	0.0	4.0
321	4.0	11.0	1.9	0.0	4.0	11.0	1.9	0.0	4.0	11.0	1.9	0.0	5.0	10.0	2.2	0.0	4.0	11.0	1.9	0.0	4.0	11.0	1.9	0.0	4.0	11.0	1.9	0.0	4.0	11.0	1.9	0.0	4.0	11.0	1.9	0.0	4.0	11.0	1.9	0.0	4.0	11.0	1.9	0.0	4.0	11.0	1.9	0.0	4.0
322	4.0	11.0	1.9	0.0	5.0	10.0	2.2	0.0	4.0	11.0	1.9	0.0	4.0	11.0	1.9	0.0	4.0	11.0	1.9	0.0	4.0	11.0	1.9	0.0	4.0	11.0	1.9	0.0	4.0	11.0	1.9	0.0	4.0	11.0	1.9	0.0	4.0	11.0	1.9	0.0	4.0	11.0	1.9	0.0	4.0	11.0	1.9	0.0	4.0
323	4.0	11.0	1.9	0.0	5.0	10.0	2.2	0.0	4.0	11.0	1.9	0.0	4.0	11.0	1.9	0.0	4.0	11.0	1.9	0.0	5.0	10.0	2.2	0.0	4.0	11.0	1.9	0.0	4.0	11.0	1.9	0.0	4.0	11.0	1.9	0.0	4.0	11.0	1.9	0.0	4.0	11.0	1.9	0.0	4.0	11.0	1.9	0.0	4.0
324	4.0	11.0	1.9	0.0	4.0	11.0	1.9	0.0	4.0	11.0	1.9	0.0	4.0	11.0	1.9	0.0	5.0	10.0	2.2	0.0	4.0	11.0	1.9	0.0	5.0	10.0	2.2	0.0	4.0	11.0	1.9	0.0	5.0	10.0	2.2	0.0	4.0	11.0	1.9	0.0	5.0	10.0	2.2	0.0	4.0	11.0	1.9	0.0	4.0
325	4.0	11.0	1.9	0.0	4.0	11.0	1.9	0.0	4.0	11.0	1.9	0.0	4.0	11.0	1.9	0.0	4.0	11.0	1.9	0.0	4.0	11.0	1.9	0.0	5.0	10.0	2.2	0.0	4.0	11.0	1.9	0.0	4.0	11.0	1.9	0.0	4.0	11.0	1.9	0.0	4.0	11.0	1.9	0.0	5.0	10.0	2.2	0.0	4.0
326	4.0	11.0	1.9	0.0	5.0	10.0	2.2	0.0	5.0	10.0	2.2	0.0	4.0	11.0	1.9	0.0	4.0	11.0	1.9	0.0	4.0	11.0	1.9	0.0	5.0	10.0	2.2	0.0	4.0	11.0	1.9	0.0	4.0	11.0	1.9	0.0	4.0	11.0	1.9	0.0	4.0	11.0	1.9	0.0	4.0	11.0	1.9	0.0	4.0
327	4.0	11.0	1.9	0.0	4.0	11.0	1.9	0.0	4.0	11.0	1.9	0.0	4.0	11.0	1.9	0.0	5.0	10.0	2.2	0.0	4.0	11.0	1.9	0.0	4.0	11.0	1.9	0.0	5.0	10.0	2.2	0.0	5.0	10.0	2.2	0.0	4.0	11.0	1.9	0.0	5.0	10.0	2.2	0.0	4.0	11.0	1.9	0.0	4.0
328	4.0	11.0	1.9	0.0	4.0	11.0	1.9	0.0	5.0	10.0	2.2	0.0	4.0	11.0	1.9	0.0	5.0	10.0	2.2	0.0	5.0	10.0	2.2	0.0	4.0	11.0	1.9	0.0	5.0	10.0	2.2	0.0	5.0	10.0	2.2	0.0	4.0	11.0	1.9	0.0	5.0	10.0	2.2	0.0	5.0	10.0	2.2	0.0	4.0
329	4.0	11.0	1.9	0.0	4.0	11.0	1.9	0.0	4.0	11.0	1.9	0.0	5.0	10.0	2.2	0.0	4.0	11.0	1.9	0.0	4.0	11.0	1.9	0.0	4.0	11.0	1.9	0.0	4.0	11.0	1.9	0.0	4.0	11.0	1.9	0.0	4.0	11.0	1.9	0.0	4.0	11.0	1.9	0.0	5.0	10.0	2.2	0.0	4.0
330	4.0	11.0	1.9	0.0	5.0	10.0	2.2	0.0	4.0	11.0	1.9	0.0	4.0	11.0	1.9	0.0	4.0	11.0	1.9	0.0	4.0	11.0	1.9	0.0	4.0	11.0	1.9	0.0	5.0	10.0	2.2	0.0	4.0	11.0	1.9	0.0	4.0	11.0	1.9	0.0	5.0	10.0	2.2	0.0	4.0	11.0	1.9	0.0	4.0
331	4.0	11.0	1.9	0.0	4.0	11.0	1.9	0.0	4.0	11.0	1.9	0.0	4.0	11.0	1.9	0.0	4.0	11.0	1.9	0.0	4.0	11.0	1.9	0.0	5.0	10.0	2.2	0.0	4.0	11.0	1.9	0.0	4.0	11.0	1.9	0.0	4.0	11.0	1.9	0.0	4.0	11.0	1.9	0.0	4.0	11.0	1.9	0.0	4.0
332	4.0	11.0	1.9	0.0	4.0	11.0	1.9	0.0	4.0	11.0	1.9	0.0	4.0	11.0	1.9	0.0	4.0	11.0	1.9	0.0	4.0	11.0	1.9	0.0	4.0	11.0	1.9	0.0	4.0	11.0	1.9	0.0	4.0	11.0	1.9	0.0	5.0	10.0	2.2	0.0	4.0	11.0	1.9	0.0	4.0	11.0	1.9	0.0	5.0
333	5.0	10.0	2.2	0.0	4.0	11.0	1.9	0.0	4.0	11.0	1.9	0.0	4.0	11.0	1.9	0.0	4.0	11.0	1.9	0.0	4.0	11.0	1.9	0.0	5.0	10.0	2.2	0.0	4.0	11.0	1.9	0.0	5.0	10.0	2.2	0.0	5.0	10.0	2.2	0.0	4.0	11.0	1.9	0.0	4.0	11.0	1.9	0.0	4.0
334	4.0	11.0	1.9	0.0	4.0	11.0	1.9	0.0	5.0	10.0	2.2	0.0	4.0	11.0	1.9	0.0	4.0	11.0	1.9	0.0	4.0	11.0	1.9	0.0	5.0	10.0	2.2	0.0	5.0	10.0	2.2	0.0	4.0	11.0	1.9	0.0	5.0	10.0	2.2	0.0	4.0	11.0	1.9	0.0	4.0	11.0	1.9	0.0	5.0
335	4.0	11.0	1.9	0.0	5.0	10.0	2.2	0.0	4.0	11.0	1.9	0.0	4.0	11.0	1.9	0.0	5.0	10.0	2.2	0.0	4.0	11.0	1.9	0.0	4.0	11.0	1.9	0.0	4.0	11.0	1.9	0.0	4.0	11.0	1.9	0.0	4.0	11.0	1.9	0.0	4.0	11.0	1.9	0.0	4.0	11.0	1.9	0.0	4.0
336	4.0	11.0	1.9	0.0	4.0	11.0	1.9	0.0	4.0	11.0	1.9	0.0	5.0	10.0	2.2	0.0	4.0	11.0	1.9	0.0	4.0	11.0	1.9	0.0	4.0	11.0	1.9	0.0	4.0	11.0	1.9	0.0	5.0	10.0	2.2	0.0	5.0	10.0	2.2	0.0	4.0	11.0	1.9	0.0	4.0	11.0	1.9	0.0	4.0
337	4.0	11.0	1.9	0.0	4.0	11.0	1.9	0.0	5.0	10.0	2.2	0.0	4.0	11.0	1.9	0.0	4.0	11.0	1.9	0.0	4.0	11.0	1.9	0.0	4.0	11.0	1.9	0.0	4.0	11.0	1.9	0.0	4.0	11.0	1.9	0.0	4.0	11.0	1.9	0.0	5.0	10.0	2.2	0.0	5.0	10.0	2.2	0.0	4.0
338	4.0	11.0	1.9	0.0	4.0	11.0	1.9	0.0	5.0	10.0	2.2	0.0	4.0	11.0	1.9	0.0	4.0	11.0	1.9	0.0	4.0	11.0	1.9	0.0	4.0	11.0	1.9	0.0	4.0	11.0	1.9	0.0	4.0	11.0	1.9	0.0	4.0	11.0	1.9	0.0	4.0	11.0	1.9	0.0	5.0	10.0	2.2	0.0	4.0
339	4.0	11.0	1.9	0.0	5.0	10.0	2.2	0.0	4.0	11.0	1.9	0.0	4.0	11.0	1.9	0.0	4.0	11.0	1.9	0.0	4.0	11.0	1.9	0.0	5.0	10.0	2.2	0.0	4.0	11.0	1.9	0.0	4.0	11.0	1.9	0.0	4.0	11.0	1.9	0.0	4.0	11.0	1.9	0.0	4.0	11.0	1.9	0.0	5.0
340	4.0	11.0	1.9	0.0	4.0	11.0	1.9	0.0	4.0	11.0	1.9	0.0	4.0	11.0	1.9	0.0	4.0	11.0	1.9	0.0	4.0	11.0	1.9	0.0	4.0	11.0	1.9	0.0	4.0	11.0	1.9	0.0	4.0	11.0	1.9	0.0	4.0	11.0	1.9	0.0	5.0	10.0	2.2	0.0	4.0	11.0	1.9	0.0	4.0
341	4.0	11.0	1.9	0.0	4.0	11.0	1.9	0.0	4.0	11.0	1.9	0.0	4.0	11.0	1.9	0.0	4.0	11.0	1.9	0.0	5.0	10.0	2.2	0.0	4.0	11.0	1.9	0.0	4.0	11.0	1.9	0.0	5.0	10.0	2.2	0.0	4.0	11.0	1.9	0.0	4.0	11.0	1.9	0.0	4.0	11.0	1.9	0.0	5.0
342	5.0	10.0	2.2	0.0	4.0	11.0	1.9	0.0	5.0	10.0	2.2	0.0	4.0	11.0	1.9	0.0	4.0	11.0	1.9	0.0	4.0	11.0	1.9	0.0	4.0	11.0	1.9	0.0	4.0	11.0	1.9	0.0	4.0	11.0	1.9	0.0	5.0	10.0	2.2	0.0	4.0	11.0	1.9	0.0	4.0	11.0	1.9	0.0	4.0
343	4.0	11.0	1.9	0.0	4.0	11.0	1.9	0.0	4.0	11.0	1.9	0.0	5.0	10.0	2.2	0.0	4.0	11.0	1.9	0.0	4.0	11.0	1.9	0.0	4.0	11.0	1.9	0.0	4.0	11.0	1.9	0.0	4.0	11.0	1.9	0.0	4.0	11.0	1.9	0.0	5.0	10.0	2.2	0.0	4.0	11.0	1.9	0.0	4.0
344	4.0	11.0	1.9	0.0	4.0	11.0	1.9	0.0	4.0	11.0	1.9	0.0	4.0	11.0	1.9	0.0	4.0	11.0	1.9	0.0	4.0	11.0	1.9	0.0	4.0	11.0	1.9	0.0	4.0	11.0	1.9	0.0	5.0	10.0	2.2	0.0	4.0	11.0	1.9	0.0	4.0	11.0	1.9	0.0	4.0	11.0	1.9	0.0	4.0
345	5.0	10.0	2.2	0.0	4.0	11.0	1.9	0.0	4.0	11.0	1.9	0.0	4.0	11.0	1.9	0.0	5.0	10.0	2.2	0.0	4.0	11.0	1.9	0.0	5.0	10.0	2.2	0.0	4.0	11.0	1.9	0.0	4.0	11.0	1.9	0.0	4.0	11.0	1.9	0.0	5.0	10.0	2.2	0.0	5.0	10.0	2.2	0.0	5.0
346	5.0	10.0	2.2	0.0	4.0	11.0	1.9	0.0	4.0	11.0	1.9	0.0	4.0	11.0	1.9	0.0	5.0	10.0	2.2	0.0	4.0	11.0	1.9	0.0	4.0	11.0	1.9	0.0	4.0	11.0	1.9	0.0	4.0	11.0	1.9	0.0	5.0	10.0	2.2	0.0	4.0	11.0	1.9	0.0	5.0	10.0	2.2	0.0	5.0
347	4.0	11.0	1.9	0.0	4.0	11.0	1.9	0.0	4.0	11.0	1.9	0.0	4.0	11.0	1.9	0.0	5.0	10.0	2.2	0.0	4.0	11.0	1.9	0.0	4.0	11.0	1.9	0.0	4.0	11.0	1.9	0.0	4.0	11.0	1.9	0.0	4.0	11.0	1.9	0.0	4.0	11.0	1.9	0.0	4.0	11.0	1.9	0.0	4.0
348	4.0	11.0	1.9	0.0	4.0	11.0	1.9	0.0	4.0	11.0	1.9	0.0	4.0	11.0	1.9	0.0	4.0	11.0	1.9	0.0	4.0	11.0	1.9	0.0	4.0	11.0	1.9	0.0	4.0	11.0	1.9	0.0	4.0	11.0	1.9	0.0	5.0	10.0	2.2	0.0	4.0	11.0	1.9	0.0	5.0	10.0	2.2	0.0	4.0
349	5.0	10.0	2.2	0.0	4.0	11.0	1.9	0.0	4.0	11.0	1.9	0.0	4.0	11.0	1.9	0.0	5.0	10.0	2.2	0.0	4.0	11.0	1.9	0.0	4.0	11.0	1.9	0.0	4.0	11.0	1.9	0.0	4.0	11.0	1.9	0.0	4.0	11.0	1.9	0.0	4.0	11.0	1.9	0.0	4.0	11.0	1.9	0.0	5.0
350	4.0	11.0	1.9	0.0	5.0	10.0	2.2	0.0	5.0	10.0	2.2	0.0	5.0	10.0	2.2	0.0	5.0	10.0	2.2	0.0	4.0	11.0	1.9	0.0	4.0	11.0	1.9	0.0	4.0	11.0	1.9	0.0	4.0	11.0	1.9	0.0	4.0	11.0	1.9	0.0	4.0	11.0	1.9	0.0	5.0	10.0	2.2	0.0	4.0
351	4.0	11.0	1.9	0.0	4.0	11.0	1.9	0.0	4.0	11.0	1.9	0.0	4.0	11.0	1.9	0.0	4.0	11.0	1.9	0.0	4.0	11.0	1.9	0.0	4.0	11.0	1.9	0.0	5.0	10.0	2.2	0.0	4.0	11.0	1.9	0.0	4.0	11.0	1.9	0.0	4.0	11.0	1.9	0.0	4.0	11.0	1.9	0.0	4.0
352	4.0	11.0	1.9	0.0	4.0	11.0	1.9	0.0	4.0	11.0	1.9	0.0	4.0	11.0	1.9	0.0	5.0	10.0	2.2	0.0	5.0	10.0	2.2	0.0	5.0	10.0	2.2	0.0	4.0	11.0	1.9	0.0	4.0	11.0	1.9	0.0	4.0	11.0	1.9	0.0	4.0	11.0	1.9	0.0	5.0	10.0	2.2	0.0	4.0
353	4.0	11.0	1.9	0.0	4.0	11.0	1.9	0.0	4.0	11.0	1.9	0.0	4.0	11.0	1.9	0.0	4.0	11.0	1.9	0.0	5.0	10.0	2.2	0.0	4.0	11.0	1.9	0.0	4.0	11.0	1.9	0.0	4.0	11.0	1.9	0.0	5.0	10.0	2.2	0.0	4.0	11.0	1.9	0.0	4.0	11.0	1.9	0.0	4.0
354	4.0	11.0	1.9	0.0	4.0	11.0	1.9	0.0	4.0	11.0	1.9	0.0	4.0	11.0	1.9	0.0	5.0	10.0	2.2	0.0	4.0	11.0	1.9	0.0	5.0	10.0	2.2	0.0	4.0	11.0	1.9	0.0	4.0	11.0	1.9	0.0	4.0	11.0	1.9	0.0	4.0	11.0	1.9	0.0	4.0	11.0	1.9	0.0	4.0
355	4.0	11.0	1.9	0.0	4.0	11.0	1.9	0.0	4.0	11.0	1.9	0.0	4.0	11.0	1.9	0.0	4.0	11.0	1.9	0.0	4.0	11.0	1.9	0.0	4.0	11.0	1.9	0.0	4.0	11.0	1.9	0.0	4.0	11.0	1.9	0.0	5.0	10.0	2.2	0.0	5.0	10.0	2.2	0.0	5.0	10.0	2.2	0.0	4.0
356	4.0	11.0	1.9	0.0	4.0	11.0	1.9	0.0	4.0	11.0	1.9	0.0	4.0	11.0	1.9	0.0	4.0	11.0	1.9	0.0	4.0	11.0	1.9	0.0	4.0	11.0	1.9	0.0	4.0	11.0	1.9	0.0	5.0	10.0	2.2	0.0	5.0	10.0	2.2	0.0	4.0	11.0	1.9	0.0	4.0	11.0	1.9	0.0	5.0
357	4.0	11.0	1.9	0.0	4.0	11.0	1.9	0.0	4.0	11.0	1.9	0.0	4.0	11.0	1.9	0.0	4.0	11.0	1.9	0.0	4.0	11.0	1.9	0.0	4.0	11.0	1.9	0.0	5.0	10.0	2.2	0.0	4.0	11.0	1.9	0.0	4.0	11.0	1.9	0.0	4.0	11.0	1.9	0.0	5.0	10.0	2.2	0.0	4.0
358	4.0	11.0	1.9	0.0	4.0	11.0	1.9	0.0	4.0	11.0	1.9	0.0	5.0	10.0	2.2	0.0	4.0	11.0	1.9	0.0	5.0	10.0	2.2	0.0	4.0	11.0	1.9	0.0	4.0	11.0	1.9	0.0	4.0	11.0	1.9	0.0	5.0	10.0	2.2	0.0	4.0	11.0	1.9	0.0	4.0	11.0	1.9	0.0	4.0
359	4.0	11.0	1.9	0.0	4.0	11.0	1.9	0.0	5.0	10.0	2.2	0.0	4.0	11.0	1.9	0.0	4.0	11.0	1.9	0.0	5.0	10.0	2.2	0.0	4.0	11.0	1.9	0.0	4.0	11.0	1.9	0.0	4.0	11.0	1.9	0.0	5.0	10.0	2.2	0.0	4.0	11.0	1.9	0.0	4.0	11.0	1.9	0.0	4.0
360	5.0	10.0	2.2	0.0	4.0	11.0	1.9	0.0	4.0	11.0	1.9	0.0	4.0	11.0	1.9	0.0	4.0	11.0	1.9	0.0	5.0	10.0	2.2	0.0	4.0	11.0	1.9	0.0	5.0	10.0	2.2	0.0	5.0	10.0	2.2	0.0	4.0	11.0	1.9	0.0	4.0	11.0	1.9	0.0	4.0	11.0	1.9	0.0	4.0
361	4.0	11.0	1.9	0.0	4.0	11.0	1.9	0.0	4.0	11.0	1.9	0.0	5.0	10.0	2.2	0.0	5.0	10.0	2.2	0.0	4.0	11.0	1.9	0.0	4.0	11.0	1.9	0.0	4.0	11.0	1.9	0.0	4.0	11.0	1.9	0.0	4.0	11.0	1.9	0.0	4.0	11.0	1.9	0.0	4.0	11.0	1.9	0.0	4.0
362	4.0	11.0	1.9	0.0	4.0	11.0	1.9	0.0	4.0	11.0	1.9	0.0	4.0	11.0	1.9	0.0	4.0	11.0	1.9	0.0	4.0	11.0	1.9	0.0	5.0	10.0	2.2	0.0	4.0	11.0	1.9	0.0	4.0	11.0	1.9	0.0	4.0	11.0	1.9	0.0	5.0	10.0	2.2	0.0	4.0	11.0	1.9	0.0	5.0
363	5.0	10.0	2.2	0.0	4.0	11.0	1.9	0.0	4.0	11.0	1.9	0.0	5.0	10.0	2.2	0.0	4.0	11.0	1.9	0.0	4.0	11.0	1.9	0.0	4.0	11.0	1.9	0.0	4.0	11.0	1.9	0.0	4.0	11.0	1.9	0.0	5.0	10.0	2.2	0.0	4.0	11.0	1.9	0.0	4.0	11.0	1.9	0.0	5.0
364	4.0	11.0	1.9	0.0	4.0	11.0	1.9	0.0	4.0	11.0	1.9	0.0	4.0	11.0	1.9	0.0	5.0	10.0	2.2	0.0	4.0	11.0	1.9	0.0	5.0	10.0	2.2	0.0	4.0	11.0	1.9	0.0	5.0	10.0	2.2	0.0	4.0	11.0	1.9	0.0	4.0	11.0	1.9	0.0	4.0	11.0	1.9	0.0	4.0
365	4.0	11.0	1.9	0.0	4.0	11.0	1.9	0.0	4.0	11.0	1.9	0.0	4.0	11.0	1.9	0.0	5.0	10.0	2.2	0.0	5.0	10.0	2.2	0.0	4.0	11.0	1.9	0.0	4.0	11.0	1.9	0.0	4.0	11.0	1.9	0.0	4.0	11.0	1.9	0.0	4.0	11.0	1.9	0.0	4.0	11.0	1.9	0.0	4.0
366	5.0	10.0	2.2	0.0	4.0	11.0	1.9	0.0	4.0	11.0	1.9	0.0	5.0	10.0	2.2	0.0	4.0	11.0	1.9	0.0	4.0	11.0	1.9	0.0	5.0	10.0	2.2	0.0	4.0	11.0	1.9	0.0	4.0	11.0	1.9	0.0	4.0	11.0	1.9	0.0	4.0	11.0	1.9	0.0	5.0	10.0	2.2	0.0	4.0
367	5.0	10.0	2.2	0.0	4.0	11.0	1.9	0.0	4.0	11.0	1.9	0.0	4.0	11.0	1.9	0.0	4.0	11.0	1.9	0.0	4.0	11.0	1.9	0.0	4.0	11.0	1.9	0.0	4.0	11.0	1.9	0.0	4.0	11.0	1.9	0.0	4.0	11.0	1.9	0.0	4.0	11.0	1.9	0.0	4.0	11.0	1.9	0.0	4.0
368	5.0	10.0	2.2	0.0	5.0	10.0	2.2	0.0	4.0	11.0	1.9	0.0	4.0	11.0	1.9	0.0	4.0	11.0	1.9	0.0	4.0	11.0	1.9	0.0	4.0	11.0	1.9	0.0	5.0	10.0	2.2	0.0	4.0	11.0	1.9	0.0	4.0	11.0	1.9	0.0	4.0	11.0	1.9	0.0	4.0	11.0	1.9	0.0	4.0
369	4.0	11.0	1.9	0.0	5.0	10.0	2.2	0.0	4.0	11.0	1.9	0.0	4.0	11.0	1.9	0.0	4.0	11.0	1.9	0.0	4.0	11.0	1.9	0.0	4.0	11.0	1.9	0.0	4.0	11.0	1.9	0.0	4.0	11.0	1.9	0.0	4.0	11.0	1.9	0.0	4.0	11.0	1.9	0.0	5.0	10.0	2.2	0.0	4.0
370	4.0	11.0	1.9	0.0	5.0	10.0	2.2	0.0	4.0	11.0	1.9	0.0	4.0	11.0	1.9	0.0	5.0	10.0	2.2	0.0	4.0	11.0	1.9	0.0	4.0	11.0	1.9	0.0	4.0	11.0	1.9	0.0	4.0	11.0	1.9	0.0	4.0	11.0	1.9	0.0	5.0	10.0	2.2	0.0	4.0	11.0	1.9	0.0	4.0
371	5.0	10.0	2.2	0.0	5.0	10.0	2.2	0.0	4.0	11.0	1.9	0.0	4.0	11.0	1.9	0.0	4.0	11.0	1.9	0.0	4.0	11.0	1.9	0.0	4.0	11.0	1.9	0.0	4.0	11.0	1.9	0.0	4.0	11.0	1.9	0.0	4.0	11.0	1.9	0.0	4.0	11.0	1.9	0.0	5.0	10.0	2.2	0.0	5.0
372	4.0	11.0	1.9	0.0	4.0	11.0	1.9	0.0	4.0	11.0	1.9	0.0	4.0	11.0	1.9	0.0	4.0	11.0	1.9	0.0	4.0	11.0	1.9	0.0	5.0	10.0	2.2	0.0	4.0	11.0	1.9	0.0	4.0	11.0	1.9	0.0	4.0	11.0	1.9	0.0	4.0	11.0	1.9	0.0	5.0	10.0	2.2	0.0	5.0
373	5.0	10.0	2.2	0.0	4.0	11.0	1.9	0.0	4.0	11.0	1.9	0.0	5.0	10.0	2.2	0.0	4.0	11.0	1.9	0.0	4.0	11.0	1.9	0.0	4.0	11.0	1.9	0.0	4.0	11.0	1.9	0.0	4.0	11.0	1.9	0.0	5.0	10.0	2.2	0.0	4.0	11.0	1.9	0.0	4.0	11.0	1.9	0.0	4.0
374	4.0	11.0	1.9	0.0	5.0	10.0	2.2	0.0	4.0	11.0	1.9	0.0	4.0	11.0	1.9	0.0	5.0	10.0	2.2	0.0	5.0	10.0	2.2	0.0	4.0	11.0	1.9	0.0	4.0	11.0	1.9	0.0	4.0	11.0	1.9	0.0	4.0	11.0	1.9	0.0	5.0	10.0	2.2	0.0	4.0	11.0	1.9	0.0	5.0
375	4.0	11.0	1.9	0.0	4.0	11.0	1.9	0.0	5.0	10.0	2.2	0.0	5.0	10.0	2.2	0.0	4.0	11.0	1.9	0.0	5.0	10.0	2.2	0.0	4.0	11.0	1.9	0.0	4.0	11.0	1.9	0.0	4.0	11.0	1.9	0.0	4.0	11.0	1.9	0.0	4.0	11.0	1.9	0.0	4.0	11.0	1.9	0.0	4.0
376	4.0	11.0	1.9	0.0	5.0	10.0	2.2	0.0	5.0	10.0	2.2	0.0	5.0	10.0	2.2	0.0	5.0	10.0	2.2	0.0	4.0	11.0	1.9	0.0	4.0	11.0	1.9	0.0	5.0	10.0	2.2	0.0	4.0	11.0	1.9	0.0	4.0	11.0	1.9	0.0	4.0	11.0	1.9	0.0	4.0	11.0	1.9	0.0	4.0
377	4.0	11.0	1.9	0.0	4.0	11.0	1.9	0.0	4.0	11.0	1.9	0.0	4.0	11.0	1.9	0.0	4.0	11.0	1.9	0.0	4.0	11.0	1.9	0.0	5.0	10.0	2.2	0.0	5.0	10.0	2.2	0.0	4.0	11.0	1.9	0.0	5.0	10.0	2.2	0.0	4.0	11.0	1.9	0.0	4.0	11.0	1.9	0.0	4.0
378	5.0	10.0	2.2	0.0	4.0	11.0	1.9	0.0	4.0	11.0	1.9	0.0	4.0	11.0	1.9	0.0	4.0	11.0	1.9	0.0	4.0	11.0	1.9	0.0	4.0	11.0	1.9	0.0	4.0	11.0	1.9	0.0	5.0	10.0	2.2	0.0	4.0	11.0	1.9	0.0	4.0	11.0	1.9	0.0	5.0	10.0	2.2	0.0	4.0
379	4.0	11.0	1.9	0.0	4.0	11.0	1.9	0.0	4.0	11.0	1.9	0.0	4.0	11.0	1.9	0.0	4.0	11.0	1.9	0.0	4.0	11.0	1.9	0.0	4.0	11.0	1.9	0.0	4.0	11.0	1.9	0.0	4.0	11.0	1.9	0.0	4.0	11.0	1.9	0.0	4.0	11.0	1.9	0.0	5.0	10.0	2.2	0.0	4.0
380	5.0	10.0	2.2	0.0	4.0	11.0	1.9	0.0	4.0	11.0	1.9	0.0	4.0	11.0	1.9	0.0	5.0	10.0	2.2	0.0	4.0	11.0	1.9	0.0	4.0	11.0	1.9	0.0	4.0	11.0	1.9	0.0	5.0	10.0	2.2	0.0	4.0	11.0	1.9	0.0	4.0	11.0	1.9	0.0	4.0	11.0	1.9	0.0	4.0
381	4.0	11.0	1.9	0.0	5.0	10.0	2.2	0.0	4.0	11.0	1.9	0.0	4.0	11.0	1.9	0.0	4.0	11.0	1.9	0.0	4.0	11.0	1.9	0.0	5.0	10.0	2.2	0.0	4.0	11.0	1.9	0.0	4.0	11.0	1.9	0.0	4.0	11.0	1.9	0.0	5.0	10.0	2.2	0.0	4.0	11.0	1.9	0.0	4.0
382	4.0	11.0	1.9	0.0	4.0	11.0	1.9	0.0	4.0	11.0	1.9	0.0	5.0	10.0	2.2	0.0	4.0	11.0	1.9	0.0	5.0	10.0	2.2	0.0	4.0	11.0	1.9	0.0	4.0	11.0	1.9	0.0	4.0	11.0	1.9	0.0	5.0	10.0	2.2	0.0	4.0	11.0	1.9	0.0	5.0	10.0	2.2	0.0	4.0
383	5.0	10.0	2.2	0.0	4.0	11.0	1.9	0.0	5.0	10.0	2.2	0.0	5.0	10.0	2.2	0.0	4.0	11.0	1.9	0.0	5.0	10.0	2.2	0.0	4.0	11.0	1.9	0.0	4.0	11.0	1.9	0.0	4.0	11.0	1.9	0.0	4.0	11.0	1.9	0.0	5.0	10.0	2.2	0.0	4.0	11.0	1.9	0.0	4.0
384	4.0	11.0	1.9	0.0	5.0	10.0	2.2	0.0	4.0	11.0	1.9	0.0	4.0	11.0	1.9	0.0	4.0	11.0	1.9	0.0	5.0	10.0	2.2	0.0	5.0	10.0	2.2	0.0	4.0	11.0	1.9	0.0	4.0	11.0	1.9	0.0	4.0	11.0	1.9	0.0	4.0	11.0	1.9	0.0	4.0	11.0	1.9	0.0	4.0
385	4.0	11.0	1.9	0.0	4.0	11.0	1.9	0.0	4.0	11.0	1.9	0.0	4.0	11.0	1.9	0.0	5.0	10.0	2.2	0.0	4.0	11.0	1.9	0.0	4.0	11.0	1.9	0.0	5.0	10.0	2.2	0.0	4.0	11.0	1.9	0.0	4.0	11.0	1.9	0.0	4.0	11.0	1.9	0.0	4.0	11.0	1.9	0.0	4.0
386	5.0	10.0	2.2	0.0	4.0	11.0	1.9	0.0	4.0	11.0	1.9	0.0	4.0	11.0	1.9	0.0	4.0	11.0	1.9	0.0	5.0	10.0	2.2	0.0	4.0	11.0	1.9	0.0	4.0	11.0	1.9	0.0	4.0	11.0	1.9	0.0	5.0	10.0	2.2	0.0	4.0	11.0	1.9	0.0	4.0	11.0	1.9	0.0	4.0
387	4.0	11.0	1.9	0.0	4.0	11.0	1.9	0.0	5.0	10.0	2.2	0.0	5.0	10.0	2.2	0.0	4.0	11.0	1.9	0.0	4.0	11.0	1.9	0.0	4.0	11.0	1.9	0.0	4.0	11.0	1.9	0.0	4.0	11.0	1.9	0.0	4.0	11.0	1.9	0.0	4.0	11.0	1.9	0.0	4.0	11.0	1.9	0.0	4.0
388	4.0	11.0	1.9	0.0	4.0	11.0	1.9	0.0	5.0	10.0	2.2	0.0	5.0	10.0	2.2	0.0	4.0	11.0	1.9	0.0	4.0	11.0	1.9	0.0	4.0	11.0	1.9	0.0	4.0	11.0	1.9	0.0	4.0	11.0	1.9	0.0	5.0	10.0	2.2	0.0	4.0	11.0	1.9	0.0	4.0	11.0	1.9	0.0	4.0
389	4.0	11.0	1.9	0.0	5.0	10.0	2.2	0.0	4.0	11.0	1.9	0.0	5.0	10.0	2.2	0.0	4.0	11.0	1.9	0.0	4.0	11.0	1.9	0.0	5.0	10.0	2.2	0.0	5.0	10.0	2.2	0.0	4.0	11.0	1.9	0.0	4.0	11.0	1.9	0.0	4.0	11.0	1.9	0.0	5.0	10.0	2.2	0.0	4.0
390	4.0	11.0	1.9	0.0	4.0	11.0	1.9	0.0	5.0	10.0	2.2	0.0	4.0	11.0	1.9	0.0	4.0	11.0	1.9	0.0	4.0	11.0	1.9	0.0	5.0	10.0	2.2	0.0	4.0	11.0	1.9	0.0	4.0	11.0	1.9	0.0	4.0	11.0	1.9	0.0	4.0	11.0	1.9	0.0	4.0	11.0	1.9	0.0	5.0
391	4.0	11.0	1.9	0.0	4.0	11.0	1.9	0.0	4.0	11.0	1.9	0.0	4.0	11.0	1.9	0.0	5.0	10.0	2.2	0.0	4.0	11.0	1.9	0.0	5.0	10.0	2.2	0.0	4.0	11.0	1.9	0.0	4.0	11.0	1.9	0.0	4.0	11.0	1.9	0.0	4.0	11.0	1.9	0.0	4.0	11.0	1.9	0.0	5.0
392	4.0	11.0	1.9	0.0	4.0	11.0	1.9	0.0	4.0	11.0	1.9	0.0	4.0	11.0	1.9	0.0	5.0	10.0	2.2	0.0	4.0	11.0	1.9	0.0	5.0	10.0	2.2	0.0	4.0	11.0	1.9	0.0	4.0	11.0	1.9	0.0	5.0	10.0	2.2	0.0	4.0	11.0	1.9	0.0	5.0	10.0	2.2	0.0	4.0
393	4.0	11.0	1.9	0.0	4.0	11.0	1.9	0.0	4.0	11.0	1.9	0.0	4.0	11.0	1.9	0.0	4.0	11.0	1.9	0.0	4.0	11.0	1.9	0.0	4.0	11.0	1.9	0.0	4.0	11.0	1.9	0.0	4.0	11.0	1.9	0.0	5.0	10.0	2.2	0.0	5.0	10.0	2.2	0.0	4.0	11.0	1.9	0.0	4.0
394	5.0	10.0	2.2	0.0	4.0	11.0	1.9	0.0	4.0	11.0	1.9	0.0	4.0	11.0	1.9	0.0	4.0	11.0	1.9	0.0	5.0	10.0	2.2	0.0	4.0	11.0	1.9	0.0	5.0	10.0	2.2	0.0	4.0	11.0	1.9	0.0	5.0	10.0	2.2	0.0	5.0	10.0	2.2	0.0	5.0	10.0	2.2	0.0	4.0
395	4.0	11.0	1.9	0.0	5.0	10.0	2.2	0.0	4.0	11.0	1.9	0.0	4.0	11.0	1.9	0.0	5.0	10.0	2.2	0.0	4.0	11.0	1.9	0.0	5.0	10.0	2.2	0.0	5.0	10.0	2.2	0.0	4.0	11.0	1.9	0.0	4.0	11.0	1.9	0.0	4.0	11.0	1.9	0.0	5.0	10.0	2.2	0.0	4.0
396	4.0	11.0	1.9	0.0	5.0	10.0	2.2	0.0	5.0	10.0	2.2	0.0	4.0	11.0	1.9	0.0	4.0	11.0	1.9	0.0	5.0	10.0	2.2	0.0	4.0	11.0	1.9	0.0	5.0	10.0	2.2	0.0	4.0	11.0	1.9	0.0	4.0	11.0	1.9	0.0	5.0	10.0	2.2	0.0	5.0	10.0	2.2	0.0	4.0
397	5.0	10.0	2.2	0.0	4.0	11.0	1.9	0.0	5.0	10.0	2.2	0.0	4.0	11.0	1.9	0.0	4.0	11.0	1.9	0.0	4.0	11.0	1.9	0.0	4.0	11.0	1.9	0.0	4.0	11.0	1.9	0.0	5.0	10.0	2.2	0.0	4.0	11.0	1.9	0.0	4.0	11.0	1.9	0.0	4.0	11.0	1.9	0.0	4.0
398	4.0	11.0	1.9	0.0	4.0	11.0	1.9	0.0	4.0	11.0	1.9	0.0	4.0	11.0	1.9	0.0	4.0	11.0	1.9	0.0	4.0	11.0	1.9	0.0	5.0	10.0	2.2	0.0	4.0	11.0	1.9	0.0	5.0	10.0	2.2	0.0	4.0	11.0	1.9	0.0	4.0	11.0	1.9	0.0	4.0	11.0	1.9	0.0	4.0
399	4.0	11.0	1.9	0.0	4.0	11.0	1.9	0.0	5.0	10.0	2.2	0.0	4.0	11.0	1.9	0.0	4.0	11.0	1.9	0.0	4.0	11.0	1.9	0.0	4.0	11.0	1.9	0.0	4.0	11.0	1.9	0.0	4.0	11.0	1.9	0.0	5.0	10.0	2.2	0.0	5.0	10.0	2.2	0.0	4.0	11.0	1.9	0.0	4.0
400	4.0	11.0	1.9	0.0	4.0	11.0	1.9	0.0	4.0	11.0	1.9	0.0	4.0	11.0	1.9	0.0	4.0	11.0	1.9	0.0	4.0	11.0	1.9	0.0	5.0	10.0	2.2	0.0	4.0	11.0	1.9	0.0	5.0	10.0	2.2	0.0	4.0	11.0	1.9	0.0	4.0	11.0	1.9	0.0	4.0	11.0	1.9	0.0	5.0
401	4.0	11.0	1.9	0.0	4.0	11.0	1.9	0.0	4.0	11.0	1.9	0.0	4.0	11.0	1.9	0.0	5.0	10.0	2.2	0.0	4.0	11.0	1.9	0.0	4.0	11.0	1.9	0.0	4.0	11.0	1.9	0.0	4.0	11.0	1.9	0.0	4.0	11.0	1.9	0.0	4.0	11.0	1.9	0.0	5.0	10.0	2.2	0.0	4.0
402	4.0	11.0	1.9	0.0	4.0	11.0	1.9	0.0	4.0	11.0	1.9	0.0	4.0	11.0	1.9	0.0	4.0	11.0	1.9	0.0	4.0	11.0	1.9	0.0	5.0	10.0	2.2	0.0	4.0	11.0	1.9	0.0	4.0	11.0	1.9	0.0	5.0	10.0	2.2	0.0	4.0	11.0	1.9	0.0	5.0	10.0	2.2	0.0	4.0
403	4.0	11.0	1.9	0.0	4.0	11.0	1.9	0.0	5.0	10.0	2.2	0.0	4.0	11.0	1.9	0.0	5.0	10.0	2.2	0.0	4.0	11.0	1.9	0.0	4.0	11.0	1.9	0.0	4.0	11.0	1.9	0.0	5.0	10.0	2.2	0.0	4.0	11.0	1.9	0.0	4.0	11.0	1.9	0.0	4.0	11.0	1.9	0.0	4.0
404	4.0	11.0	1.9	0.0	4.0	11.0	1.9	0.0	4.0	11.0	1.9	0.0	5.0	10.0	2.2	0.0	4.0	11.0	1.9	0.0	4.0	11.0	1.9	0.0	5.0	10.0	2.2	0.0	4.0	11.0	1.9	0.0	4.0	11.0	1.9	0.0	4.0	11.0	1.9	0.0	4.0	11.0	1.9	0.0	5.0	10.0	2.2	0.0	5.0
405	4.0	11.0	1.9	0.0	4.0	11.0	1.9	0.0	5.0	10.0	2.2	0.0	4.0	11.0	1.9	0.0	5.0	10.0	2.2	0.0	4.0	11.0	1.9	0.0	4.0	11.0	1.9	0.0	4.0	11.0	1.9	0.0	4.0	11.0	1.9	0.0	4.0	11.0	1.9	0.0	4.0	11.0	1.9	0.0	4.0	11.0	1.9	0.0	5.0
406	4.0	11.0	1.9	0.0	4.0	11.0	1.9	0.0	4.0	11.0	1.9	0.0	5.0	10.0	2.2	0.0	5.0	10.0	2.2	0.0	4.0	11.0	1.9	0.0	4.0	11.0	1.9	0.0	4.0	11.0	1.9	0.0	4.0	11.0	1.9	0.0	4.0	11.0	1.9	0.0	5.0	10.0	2.2	0.0	4.0	11.0	1.9	0.0	4.0
407	4.0	11.0	1.9	0.0	4.0	11.0	1.9	0.0	4.0	11.0	1.9	0.0	5.0	10.0	2.2	0.0	4.0	11.0	1.9	0.0	4.0	11.0	1.9	0.0	5.0	10.0	2.2	0.0	5.0	10.0	2.2	0.0	4.0	11.0	1.9	0.0	4.0	11.0	1.9	0.0	4.0	11.0	1.9	0.0	4.0	11.0	1.9	0.0	4.0
408	4.0	11.0	1.9	0.0	4.0	11.0	1.9	0.0	4.0	11.0	1.9	0.0	4.0	11.0	1.9	0.0	4.0	11.0	1.9	0.0	5.0	10.0	2.2	0.0	4.0	11.0	1.9	0.0	4.0	11.0	1.9	0.0	4.0	11.0	1.9	0.0	5.0	10.0	2.2	0.0	4.0	11.0	1.9	0.0	5.0	10.0	2.2	0.0	4.0
409	4.0	11.0	1.9	0.0	5.0	10.0	2.2	0.0	4.0	11.0	1.9	0.0	4.0	11.0	1.9	0.0	4.0	11.0	1.9	0.0	4.0	11.0	1.9	0.0	4.0	11.0	1.9	0.0	4.0	11.0	1.9	0.0	5.0	10.0	2.2	0.0	4.0	11.0	1.9	0.0	4.0	11.0	1.9	0.0	4.0	11.0	1.9	0.0	4.0
410	4.0	11.0	1.9	0.0	4.0	11.0	1.9	0.0	4.0	11.0	1.9	0.0	4.0	11.0	1.9	0.0	4.0	11.0	1.9	0.0	4.0	11.0	1.9	0.0	4.0	11.0	1.9	0.0	5.0	10.0	2.2	0.0	5.0	10.0	2.2	0.0	4.0	11.0	1.9	0.0	4.0	11.0	1.9	0.0	4.0	11.0	1.9	0.0	5.0
411	4.0	11.0	1.9	0.0	4.0	11.0	1.9	0.0	5.0	10.0	2.2	0.0	5.0	10.0	2.2	0.0	4.0	11.0	1.9	0.0	4.0	11.0	1.9	0.0	4.0	11.0	1.9	0.0	4.0	11.0	1.9	0.0	5.0	10.0	2.2	0.0	4.0	11.0	1.9	0.0	5.0	10.0	2.2	0.0	4.0	11.0	1.9	0.0	5.0
412	4.0	11.0	1.9	0.0	5.0	10.0	2.2	0.0	4.0	11.0	1.9	0.0	5.0	10.0	2.2	0.0	4.0	11.0	1.9	0.0	5.0	10.0	2.2	0.0	5.0	10.0	2.2	0.0	4.0	11.0	1.9	0.0	4.0	11.0	1.9	0.0	4.0	11.0	1.9	0.0	4.0	11.0	1.9	0.0	4.0	11.0	1.9	0.0	4.0
413	5.0	10.0	2.2	0.0	4.0	11.0	1.9	0.0	4.0	11.0	1.9	0.0	5.0	10.0	2.2	0.0	5.0	10.0	2.2	0.0	4.0	11.0	1.9	0.0	4.0	11.0	1.9	0.0	4.0	11.0	1.9	0.0	4.0	11.0	1.9	0.0	4.0	11.0	1.9	0.0	4.0	11.0	1.9	0.0	4.0	11.0	1.9	0.0	4.0
414	4.0	11.0	1.9	0.0	4.0	11.0	1.9	0.0	4.0	11.0	1.9	0.0	4.0	11.0	1.9	0.0	4.0	11.0	1.9	0.0	4.0	11.0	1.9	0.0	4.0	11.0	1.9	0.0	4.0	11.0	1.9	0.0	4.0	11.0	1.9	0.0	4.0	11.0	1.9	0.0	4.0	11.0	1.9	0.0	4.0	11.0	1.9	0.0	5.0
415	4.0	11.0	1.9	0.0	4.0	11.0	1.9	0.0	4.0	11.0	1.9	0.0	4.0	11.0	1.9	0.0	5.0	10.0	2.2	0.0	4.0	11.0	1.9	0.0	4.0	11.0	1.9	0.0	4.0	11.0	1.9	0.0	5.0	10.0	2.2	0.0	5.0	10.0	2.2	0.0	4.0	11.0	1.9	0.0	5.0	10.0	2.2	0.0	4.0
416	5.0	10.0	2.2	0.0	4.0	11.0	1.9	0.0	5.0	10.0	2.2	0.0	4.0	11.0	1.9	0.0	5.0	10.0	2.2	0.0	5.0	10.0	2.2	0.0	5.0	10.0	2.2	0.0	4.0	11.0	1.9	0.0	4.0	11.0	1.9	0.0	4.0	11.0	1.9	0.0	4.0	11.0	1.9	0.0	4.0	11.0	1.9	0.0	4.0
417	5.0	10.0	2.2	0.0	4.0	11.0	1.9	0.0	4.0	11.0	1.9	0.0	4.0	11.0	1.9	0.0	4.0	11.0	1.9	0.0	4.0	11.0	1.9	0.0	4.0	11.0	1.9	0.0	4.0	11.0	1.9	0.0	5.0	10.0	2.2	0.0	5.0	10.0	2.2	0.0	4.0	11.0	1.9	0.0	4.0	11.0	1.9	0.0	4.0
418	4.0	11.0	1.9	0.0	4.0	11.0	1.9	0.0	5.0	10.0	2.2	0.0	5.0	10.0	2.2	0.0	4.0	11.0	1.9	0.0	4.0	11.0	1.9	0.0	4.0	11.0	1.9	0.0	4.0	11.0	1.9	0.0	5.0	10.0	2.2	0.0	4.0	11.0	1.9	0.0	5.0	10.0	2.2	0.0	4.0	11.0	1.9	0.0	4.0
419	4.0	11.0	1.9	0.0	5.0	10.0	2.2	0.0	4.0	11.0	1.9	0.0	4.0	11.0	1.9	0.0	5.0	10.0	2.2	0.0	4.0	11.0	1.9	0.0	5.0	10.0	2.2	0.0	4.0	11.0	1.9	0.0	4.0	11.0	1.9	0.0	4.0	11.0	1.9	0.0	4.0	11.0	1.9	0.0	4.0	11.0	1.9	0.0	4.0
420	5.0	10.0	2.2	0.0	4.0	11.0	1.9	0.0	4.0	11.0	1.9	0.0	4.0	11.0	1.9	0.0	4.0	11.0	1.9	0.0	4.0	11.0	1.9	0.0	4.0	11.0	1.9	0.0	4.0	11.0	1.9	0.0	4.0	11.0	1.9	0.0	5.0	10.0	2.2	0.0	4.0	11.0	1.9	0.0	4.0	11.0	1.9	0.0	4.0
421	4.0	11.0	1.9	0.0	4.0	11.0	1.9	0.0	5.0	10.0	2.2	0.0	4.0	11.0	1.9	0.0	4.0	11.0	1.9	0.0	4.0	11.0	1.9	0.0	5.0	10.0	2.2	0.0	5.0	10.0	2.2	0.0	4.0	11.0	1.9	0.0	5.0	10.0	2.2	0.0	4.0	11.0	1.9	0.0	5.0	10.0	2.2	0.0	4.0
422	4.0	11.0	1.9	0.0	5.0	10.0	2.2	0.0	4.0	11.0	1.9	0.0	5.0	10.0	2.2	0.0	4.0	11.0	1.9	0.0	5.0	10.0	2.2	0.0	4.0	11.0	1.9	0.0	4.0	11.0	1.9	0.0	5.0	10.0	2.2	0.0	4.0	11.0	1.9	0.0	4.0	11.0	1.9	0.0	4.0	11.0	1.9	0.0	4.0
423	4.0	11.0	1.9	0.0	4.0	11.0	1.9	0.0	5.0	10.0	2.2	0.0	4.0	11.0	1.9	0.0	5.0	10.0	2.2	0.0	4.0	11.0	1.9	0.0	4.0	11.0	1.9	0.0	5.0	10.0	2.2	0.0	4.0	11.0	1.9	0.0	4.0	11.0	1.9	0.0	4.0	11.0	1.9	0.0	5.0	10.0	2.2	0.0	4.0
424	5.0	10.0	2.2	0.0	5.0	10.0	2.2	0.0	4.0	11.0	1.9	0.0	4.0	11.0	1.9	0.0	4.0	11.0	1.9	0.0	4.0	11.0	1.9	0.0	4.0	11.0	1.9	0.0	5.0	10.0	2.2	0.0	5.0	10.0	2.2	0.0	4.0	11.0	1.9	0.0	4.0	11.0	1.9	0.0	5.0	10.0	2.2	0.0	4.0
425	4.0	11.0	1.9	0.0	4.0	11.0	1.9	0.0	4.0	11.0	1.9	0.0	5.0	10.0	2.2	0.0	4.0	11.0	1.9	0.0	4.0	11.0	1.9	0.0	4.0	11.0	1.9	0.0	4.0	11.0	1.9	0.0	4.0	11.0	1.9	0.0	4.0	11.0	1.9	0.0	4.0	11.0	1.9	0.0	4.0	11.0	1.9	0.0	5.0
426	4.0	11.0	1.9	0.0	4.0	11.0	1.9	0.0	5.0	10.0	2.2	0.0	5.0	10.0	2.2	0.0	4.0	11.0	1.9	0.0	4.0	11.0	1.9	0.0	4.0	11.0	1.9	0.0	4.0	11.0	1.9	0.0	4.0	11.0	1.9	0.0	4.0	11.0	1.9	0.0	4.0	11.0	1.9	0.0	4.0	11.0	1.9	0.0	5.0
427	4.0	11.0	1.9	0.0	4.0	11.0	1.9	0.0	4.0	11.0	1.9	0.0	4.0	11.0	1.9	0.0	4.0	11.0	1.9	0.0	4.0	11.0	1.9	0.0	5.0	10.0	2.2	0.0	4.0	11.0	1.9	0.0	4.0	11.0	1.9	0.0	5.0	10.0	2.2	0.0	5.0	10.0	2.2	0.0	4.0	11.0	1.9	0.0	4.0
428	4.0	11.0	1.9	0.0	4.0	11.0	1.9	0.0	5.0	10.0	2.2	0.0	4.0	11.0	1.9	0.0	4.0	11.0	1.9	0.0	4.0	11.0	1.9	0.0	4.0	11.0	1.9	0.0	5.0	10.0	2.2	0.0	4.0	11.0	1.9	0.0	4.0	11.0	1.9	0.0	4.0	11.0	1.9	0.0	4.0	11.0	1.9	0.0	4.0
429	4.0	11.0	1.9	0.0	4.0	11.0	1.9	0.0	4.0	11.0	1.9	0.0	4.0	11.0	1.9	0.0	4.0	11.0	1.9	0.0	4.0	11.0	1.9	0.0	4.0	11.0	1.9	0.0	5.0	10.0	2.2	0.0	4.0	11.0	1.9	0.0	4.0	11.0	1.9	0.0	4.0	11.0	1.9	0.0	4.0	11.0	1.9	0.0	5.0
430	4.0	11.0	1.9	0.0	4.0	11.0	1.9	0.0	4.0	11.0	1.9	0.0	5.0	10.0	2.2	0.0	4.0	11.0	1.9	0.0	4.0	11.0	1.9	0.0	5.0	10.0	2.2	0.0	4.0	11.0	1.9	0.0	4.0	11.0	1.9	0.0	4.0	11.0	1.9	0.0	4.0	11.0	1.9	0.0	5.0	10.0	2.2	0.0	4.0
431	4.0	11.0	1.9	0.0	4.0	11.0	1.9	0.0	4.0	11.0	1.9	0.0	4.0	11.0	1.9	0.0	4.0	11.0	1.9	0.0	4.0	11.0	1.9	0.0	4.0	11.0	1.9	0.0	4.0	11.0	1.9	0.0	4.0	11.0	1.9	0.0	4.0	11.0	1.9	0.0	4.0	11.0	1.9	0.0	5.0	10.0	2.2	0.0	5.0
432	5.0	10.0	2.2	0.0	5.0	10.0	2.2	0.0	5.0	10.0	2.2	0.0	4.0	11.0	1.9	0.0	5.0	10.0	2.2	0.0	4.0	11.0	1.9	0.0	4.0	11.0	1.9	0.0	4.0	11.0	1.9	0.0	4.0	11.0	1.9	0.0	4.0	11.0	1.9	0.0	4.0	11.0	1.9	0.0	4.0	11.0	1.9	0.0	4.0
433	5.0	10.0	2.2	0.0	5.0	10.0	2.2	0.0	4.0	11.0	1.9	0.0	4.0	11.0	1.9	0.0	4.0	11.0	1.9	0.0	4.0	11.0	1.9	0.0	4.0	11.0	1.9	0.0	4.0	11.0	1.9	0.0	4.0	11.0	1.9	0.0	5.0	10.0	2.2	0.0	4.0	11.0	1.9	0.0	5.0	10.0	2.2	0.0	4.0
434	4.0	11.0	1.9	0.0	4.0	11.0	1.9	0.0	4.0	11.0	1.9	0.0	4.0	11.0	1.9	0.0	4.0	11.0	1.9	0.0	4.0	11.0	1.9	0.0	4.0	11.0	1.9	0.0	4.0	11.0	1.9	0.0	4.0	11.0	1.9	0.0	5.0	10.0	2.2	0.0	4.0	11.0	1.9	0.0	5.0	10.0	2.2	0.0	5.0
435	4.0	11.0	1.9	0.0	4.0	11.0	1.9	0.0	4.0	11.0	1.9	0.0	4.0	11.0	1.9	0.0	4.0	11.0	1.9	0.0	5.0	10.0	2.2	0.0	4.0	11.0	1.9	0.0	4.0	11.0	1.9	0.0	4.0	11.0	1.9	0.0	4.0	11.0	1.9	0.0	4.0	11.0	1.9	0.0	4.0	11.0	1.9	0.0	5.0
436	4.0	11.0	1.9	0.0	5.0	10.0	2.2	0.0	4.0	11.0	1.9	0.0	4.0	11.0	1.9	0.0	4.0	11.0	1.9	0.0	4.0	11.0	1.9	0.0	4.0	11.0	1.9	0.0	4.0	11.0	1.9	0.0	4.0	11.0	1.9	0.0	4.0	11.0	1.9	0.0	4.0	11.0	1.9	0.0	4.0	11.0	1.9	0.0	5.0
437	4.0	11.0	1.9	0.0	4.0	11.0	1.9	0.0	5.0	10.0	2.2	0.0	4.0	11.0	1.9	0.0	5.0	10.0	2.2	0.0	4.0	11.0	1.9	0.0	4.0	11.0	1.9	0.0	4.0	11.0	1.9	0.0	4.0	11.0	1.9	0.0	4.0	11.0	1.9	0.0	5.0	10.0	2.2	0.0	4.0	11.0	1.9	0.0	4.0
438	4.0	11.0	1.9	0.0	4.0	11.0	1.9	0.0	4.0	11.0	1.9	0.0	4.0	11.0	1.9	0.0	4.0	11.0	1.9	0.0	4.0	11.0	1.9	0.0	5.0	10.0	2.2	0.0	4.0	11.0	1.9	0.0	4.0	11.0	1.9	0.0	5.0	10.0	2.2	0.0	4.0	11.0	1.9	0.0	4.0	11.0	1.9	0.0	4.0
439	4.0	11.0	1.9	0.0	5.0	10.0	2.2	0.0	4.0	11.0	1.9	0.0	5.0	10.0	2.2	0.0	4.0	11.0	1.9	0.0	4.0	11.0	1.9	0.0	5.0	10.0	2.2	0.0	4.0	11.0	1.9	0.0	4.0	11.0	1.9	0.0	5.0	10.0	2.2	0.0	4.0	11.0	1.9	0.0	4.0	11.0	1.9	0.0	4.0
440	4.0	11.0	1.9	0.0	5.0	10.0	2.2	0.0	4.0	11.0	1.9	0.0	4.0	11.0	1.9	0.0	4.0	11.0	1.9	0.0	4.0	11.0	1.9	0.0	5.0	10.0	2.2	0.0	4.0	11.0	1.9	0.0	4.0	11.0	1.9	0.0	4.0	11.0	1.9	0.0	4.0	11.0	1.9	0.0	5.0	10.0	2.2	0.0	4.0
441	4.0	11.0	1.9	0.0	4.0	11.0	1.9	0.0	4.0	11.0	1.9	0.0	4.0	11.0	1.9	0.0	4.0	11.0	1.9	0.0	5.0	10.0	2.2	0.0	4.0	11.0	1.9	0.0	5.0	10.0	2.2	0.0	4.0	11.0	1.9	0.0	5.0	10.0	2.2	0.0	5.0	10.0	2.2	0.0	4.0	11.0	1.9	0.0	5.0
442	4.0	11.0	1.9	0.0	5.0	10.0	2.2	0.0	5.0	10.0	2.2	0.0	4.0	11.0	1.9	0.0	5.0	10.0	2.2	0.0	4.0	11.0	1.9	0.0	4.0	11.0	1.9	0.0	4.0	11.0	1.9	0.0	4.0	11.0	1.9	0.0	4.0	11.0	1.9	0.0	5.0	10.0	2.2	0.0	4.0	11.0	1.9	0.0	4.0
443	4.0	11.0	1.9	0.0	4.0	11.0	1.9	0.0	4.0	11.0	1.9	0.0	4.0	11.0	1.9	0.0	5.0	10.0	2.2	0.0	4.0	11.0	1.9	0.0	5.0	10.0	2.2	0.0	5.0	10.0	2.2	0.0	4.0	11.0	1.9	0.0	4.0	11.0	1.9	0.0	4.0	11.0	1.9	0.0	4.0	11.0	1.9	0.0	5.0
444	4.0	11.0	1.9	0.0	5.0	10.0	2.2	0.0	5.0	10.0	2.2	0.0	4.0	11.0	1.9	0.0	4.0	11.0	1.9	0.0	4.0	11.0	1.9	0.0	4.0	11.0	1.9	0.0	5.0	10.0	2.2	0.0	4.0	11.0	1.9	0.0	4.0	11.0	1.9	0.0	4.0	11.0	1.9	0.0	4.0	11.0	1.9	0.0	4.0
445	4.0	11.0	1.9	0.0	5.0	10.0	2.2	0.0	4.0	11.0	1.9	0.0	4.0	11.0	1.9	0.0	4.0	11.0	1.9	0.0	5.0	10.0	2.2	0.0	5.0	10.0	2.2	0.0	4.0	11.0	1.9	0.0	4.0	11.0	1.9	0.0	4.0	11.0	1.9	0.0	4.0	11.0	1.9	0.0	4.0	11.0	1.9	0.0	5.0
446	4.0	11.0	1.9	0.0	4.0	11.0	1.9	0.0	4.0	11.0	1.9	0.0	5.0	10.0	2.2	0.0	4.0	11.0	1.9	0.0	4.0	11.0	1.9	0.0	4.0	11.0	1.9	0.0	4.0	11.0	1.9	0.0	5.0	10.0	2.2	0.0	4.0	11.0	1.9	0.0	4.0	11.0	1.9	0.0	5.0	10.0	2.2	0.0	4.0
447	4.0	11.0	1.9	0.0	4.0	11.0	1.9	0.0	4.0	11.0	1.9	0.0	5.0	10.0	2.2	0.0	5.0	10.0	2.2	0.0	4.0	11.0	1.9	0.0	5.0	10.0	2.2	0.0	4.0	11.0	1.9	0.0	4.0	11.0	1.9	0.0	4.0	11.0	1.9	0.0	4.0	11.0	1.9	0.0	4.0	11.0	1.9	0.0	4.0
448	4.0	11.0	1.9	0.0	4.0	11.0	1.9	0.0	4.0	11.0	1.9	0.0	4.0	11.0	1.9	0.0	4.0	11.0	1.9	0.0	5.0	10.0	2.2	0.0	5.0	10.0	2.2	0.0	4.0	11.0	1.9	0.0	4.0	11.0	1.9	0.0	5.0	10.0	2.2	0.0	4.0	11.0	1.9	0.0	4.0	11.0	1.9	0.0	4.0
449	5.0	10.0	2.2	0.0	4.0	11.0	1.9	0.0	4.0	11.0	1.9	0.0	5.0	10.0	2.2	0.0	4.0	11.0	1.9	0.0	4.0	11.0	1.9	0.0	4.0	11.0	1.9	0.0	4.0	11.0	1.9	0.0	4.0	11.0	1.9	0.0	4.0	11.0	1.9	0.0	4.0	11.0	1.9	0.0	4.0	11.0	1.9	0.0	4.0
450	4.0	11.0	1.9	0.0	4.0	11.0	1.9	0.0	4.0	11.0	1.9	0.0	4.0	11.0	1.9	0.0	4.0	11.0	1.9	0.0	5.0	10.0	2.2	0.0	4.0	11.0	1.9	0.0	4.0	11.0	1.9	0.0	4.0	11.0	1.9	0.0	4.0	11.0	1.9	0.0	5.0	10.0	2.2	0.0	4.0	11.0	1.9	0.0	4.0
451	4.0	11.0	1.9	0.0	4.0	11.0	1.9	0.0	4.0	11.0	1.9	0.0	4.0	11.0	1.9	0.0	4.0	11.0	1.9	0.0	4.0	11.0	1.9	0.0	5.0	10.0	2.2	0.0	4.0	11.0	1.9	0.0	4.0	11.0	1.9	0.0	4.0	11.0	1.9	0.0	5.0	10.0	2.2	0.0	4.0	11.0	1.9	0.0	4.0
452	4.0	11.0	1.9	0.0	4.0	11.0	1.9	0.0	5.0	10.0	2.2	0.0	4.0	11.0	1.9	0.0	5.0	10.0	2.2	0.0	4.0	11.0	1.9	0.0	5.0	10.0	2.2	0.0	4.0	11.0	1.9	0.0	5.0	10.0	2.2	0.0	4.0	11.0	1.9	0.0	5.0	10.0	2.2	0.0	4.0	11.0	1.9	0.0	4.0
453	4.0	11.0	1.9	0.0	4.0	11.0	1.9	0.0	4.0	11.0	1.9	0.0	4.0	11.0	1.9	0.0	4.0	11.0	1.9	0.0	4.0	11.0	1.9	0.0	4.0	11.0	1.9	0.0	5.0	10.0	2.2	0.0	4.0	11.0	1.9	0.0	4.0	11.0	1.9	0.0	5.0	10.0	2.2	0.0	4.0	11.0	1.9	0.0	4.0
454	5.0	10.0	2.2	0.0	4.0	11.0	1.9	0.0	5.0	10.0	2.2	0.0	4.0	11.0	1.9	0.0	4.0	11.0	1.9	0.0	4.0	11.0	1.9	0.0	4.0	11.0	1.9	0.0	4.0	11.0	1.9	0.0	4.0	11.0	1.9	0.0	4.0	11.0	1.9	0.0	4.0	11.0	1.9	0.0	4.0	11.0	1.9	0.0	5.0
455	5.0	10.0	2.2	0.0	5.0	10.0	2.2	0.0	4.0	11.0	1.9	0.0	4.0	11.0	1.9	0.0	4.0	11.0	1.9	0.0	4.0	11.0	1.9	0.0	4.0	11.0	1.9	0.0	4.0	11.0	1.9	0.0	4.0	11.0	1.9	0.0	4.0	11.0	1.9	0.0	5.0	10.0	2.2	0.0	4.0	11.0	1.9	0.0	4.0
456	4.0	11.0	1.9	0.0	4.0	11.0	1.9	0.0	4.0	11.0	1.9	0.0	4.0	11.0	1.9	0.0	5.0	10.0	2.2	0.0	4.0	11.0	1.9	0.0	5.0	10.0	2.2	0.0	5.0	10.0	2.2	0.0	4.0	11.0	1.9	0.0	4.0	11.0	1.9	0.0	4.0	11.0	1.9	0.0	4.0	11.0	1.9	0.0	4.0
457	4.0	11.0	1.9	0.0	5.0	10.0	2.2	0.0	4.0	11.0	1.9	0.0	4.0	11.0	1.9	0.0	4.0	11.0	1.9	0.0	5.0	10.0	2.2	0.0	4.0	11.0	1.9	0.0	4.0	11.0	1.9	0.0	4.0	11.0	1.9	0.0	4.0	11.0	1.9	0.0	4.0	11.0	1.9	0.0	5.0	10.0	2.2	0.0	4.0
458	5.0	10.0	2.2	0.0	4.0	11.0	1.9	0.0	4.0	11.0	1.9	0.0	4.0	11.0	1.9	0.0	4.0	11.0	1.9	0.0	4.0	11.0	1.9	0.0	4.0	11.0	1.9	0.0	4.0	11.0	1.9	0.0	4.0	11.0	1.9	0.0	4.0	11.0	1.9	0.0	4.0	11.0	1.9	0.0	5.0	10.0	2.2	0.0	5.0
459	5.0	10.0	2.2	0.0	5.0	10.0	2.2	0.0	4.0	11.0	1.9	0.0	5.0	10.0	2.2	0.0	4.0	11.0	1.9	0.0	4.0	11.0	1.9	0.0	4.0	11.0	1.9	0.0	4.0	11.0	1.9	0.0	4.0	11.0	1.9	0.0	4.0	11.0	1.9	0.0	4.0	11.0	1.9	0.0	4.0	11.0	1.9	0.0	4.0
460	5.0	10.0	2.2	0.0	5.0	10.0	2.2	0.0	4.0	11.0	1.9	0.0	5.0	10.0	2.2	0.0	4.0	11.0	1.9	0.0	5.0	10.0	2.2	0.0	4.0	11.0	1.9	0.0	4.0	11.0	1.9	0.0	5.0	10.0	2.2	0.0	4.0	11.0	1.9	0.0	4.0	11.0	1.9	0.0	4.0	11.0	1.9	0.0	5.0
461	4.0	11.0	1.9	0.0	4.0	11.0	1.9	0.0	4.0	11.0	1.9	0.0	4.0	11.0	1.9	0.0	5.0	10.0	2.2	0.0	5.0	10.0	2.2	0.0	4.0	11.0	1.9	0.0	4.0	11.0	1.9	0.0	4.0	11.0	1.9	0.0	4.0	11.0	1.9	0.0	5.0	10.0	2.2	0.0	4.0	11.0	1.9	0.0	4.0
462	4.0	11.0	1.9	0.0	4.0	11.0	1.9	0.0	4.0	11.0	1.9	0.0	4.0	11.0	1.9	0.0	4.0	11.0	1.9	0.0	4.0	11.0	1.9	0.0	4.0	11.0	1.9	0.0	4.0	11.0	1.9	0.0	5.0	10.0	2.2	0.0	4.0	11.0	1.9	0.0	4.0	11.0	1.9	0.0	4.0	11.0	1.9	0.0	5.0
463	5.0	10.0	2.2	0.0	5.0	10.0	2.2	0.0	4.0	11.0	1.9	0.0	5.0	10.0	2.2	0.0	4.0	11.0	1.9	0.0	4.0	11.0	1.9	0.0	4.0	11.0	1.9	0.0	4.0	11.0	1.9	0.0	5.0	10.0	2.2	0.0	4.0	11.0	1.9	0.0	4.0	11.0	1.9	0.0	4.0	11.0	1.9	0.0	4.0
464	5.0	10.0	2.2	0.0	4.0	11.0	1.9	0.0	4.0	11.0	1.9	0.0	4.0	11.0	1.9	0.0	4.0	11.0	1.9	0.0	4.0	11.0	1.9	0.0	4.0	11.0	1.9	0.0	4.0	11.0	1.9	0.0	4.0	11.0	1.9	0.0	5.0	10.0	2.2	0.0	4.0	11.0	1.9	0.0	4.0	11.0	1.9	0.0	5.0
465	4.0	11.0	1.9	0.0	5.0	10.0	2.2	0.0	4.0	11.0	1.9	0.0	5.0	10.0	2.2	0.0	4.0	11.0	1.9	0.0	4.0	11.0	1.9	0.0	4.0	11.0	1.9	0.0	4.0	11.0	1.9	0.0	4.0	11.0	1.9	0.0	4.0	11.0	1.9	0.0	4.0	11.0	1.9	0.0	5.0	10.0	2.2	0.0	4.0
466	4.0	11.0	1.9	0.0	4.0	11.0	1.9	0.0	4.0	11.0	1.9	0.0	4.0	11.0	1.9	0.0	4.0	11.0	1.9	0.0	4.0	11.0	1.9	0.0	4.0	11.0	1.9	0.0	5.0	10.0	2.2	0.0	4.0	11.0	1.9	0.0	5.0	10.0	2.2	0.0	4.0	11.0	1.9	0.0	4.0	11.0	1.9	0.0	4.0
467	4.0	11.0	1.9	0.0	4.0	11.0	1.9	0.0	4.0	11.0	1.9	0.0	5.0	10.0	2.2	0.0	5.0	10.0	2.2	0.0	4.0	11.0	1.9	0.0	4.0	11.0	1.9	0.0	4.0	11.0	1.9	0.0	5.0	10.0	2.2	0.0	4.0	11.0	1.9	0.0	4.0	11.0	1.9	0.0	4.0	11.0	1.9	0.0	4.0
468	4.0	11.0	1.9	0.0	4.0	11.0	1.9	0.0	4.0	11.0	1.9	0.0	5.0	10.0	2.2	0.0	4.0	11.0	1.9	0.0	4.0	11.0	1.9	0.0	4.0	11.0	1.9	0.0	5.0	10.0	2.2	0.0	4.0	11.0	1.9	0.0	4.0	11.0	1.9	0.0	4.0	11.0	1.9	0.0	4.0	11.0	1.9	0.0	5.0
469	4.0	11.0	1.9	0.0	5.0	10.0	2.2	0.0	5.0	10.0	2.2	0.0	4.0	11.0	1.9	0.0	5.0	10.0	2.2	0.0	4.0	11.0	1.9	0.0	4.0	11.0	1.9	0.0	5.0	10.0	2.2	0.0	4.0	11.0	1.9	0.0	4.0	11.0	1.9	0.0	5.0	10.0	2.2	0.0	4.0	11.0	1.9	0.0	4.0
470	4.0	11.0	1.9	0.0	4.0	11.0	1.9	0.0	4.0	11.0	1.9	0.0	4.0	11.0	1.9	0.0	5.0	10.0	2.2	0.0	5.0	10.0	2.2	0.0	5.0	10.0	2.2	0.0	4.0	11.0	1.9	0.0	4.0	11.0	1.9	0.0	5.0	10.0	2.2	0.0	5.0	10.0	2.2	0.0	4.0	11.0	1.9	0.0	4.0
471	4.0	11.0	1.9	0.0	4.0	11.0	1.9	0.0	4.0	11.0	1.9	0.0	5.0	10.0	2.2	0.0	4.0	11.0	1.9	0.0	5.0	10.0	2.2	0.0	4.0	11.0	1.9	0.0	5.0	10.0	2.2	0.0	4.0	11.0	1.9	0.0	5.0	10.0	2.2	0.0	4.0	11.0	1.9	0.0	4.0	11.0	1.9	0.0	4.0
472	5.0	10.0	2.2	0.0	4.0	11.0	1.9	0.0	4.0	11.0	1.9	0.0	4.0	11.0	1.9	0.0	4.0	11.0	1.9	0.0	4.0	11.0	1.9	0.0	5.0	10.0	2.2	0.0	4.0	11.0	1.9	0.0	4.0	11.0	1.9	0.0	4.0	11.0	1.9	0.0	4.0	11.0	1.9	0.0	5.0	10.0	2.2	0.0	4.0
473	5.0	10.0	2.2	0.0	4.0	11.0	1.9	0.0	4.0	11.0	1.9	0.0	5.0	10.0	2.2	0.0	4.0	11.0	1.9	0.0	4.0	11.0	1.9	0.0	4.0	11.0	1.9	0.0	4.0	11.0	1.9	0.0	5.0	10.0	2.2	0.0	4.0	11.0	1.9	0.0	4.0	11.0	1.9	0.0	4.0	11.0	1.9	0.0	4.0
474	4.0	11.0	1.9	0.0	4.0	11.0	1.9	0.0	4.0	11.0	1.9	0.0	4.0	11.0	1.9	0.0	4.0	11.0	1.9	0.0	5.0	10.0	2.2	0.0	4.0	11.0	1.9	0.0	5.0	10.0	2.2	0.0	4.0	11.0	1.9	0.0	4.0	11.0	1.9	0.0	4.0	11.0	1.9	0.0	4.0	11.0	1.9	0.0	4.0
475	5.0	10.0	2.2	0.0	4.0	11.0	1.9	0.0	4.0	11.0	1.9	0.0	4.0	11.0	1.9	0.0	4.0	11.0	1.9	0.0	4.0	11.0	1.9	0.0	4.0	11.0	1.9	0.0	4.0	11.0	1.9	0.0	4.0	11.0	1.9	0.0	4.0	11.0	1.9	0.0	4.0	11.0	1.9	0.0	5.0	10.0	2.2	0.0	4.0
476	4.0	11.0	1.9	0.0	4.0	11.0	1.9	0.0	4.0	11.0	1.9	0.0	4.0	11.0	1.9	0.0	5.0	10.0	2.2	0.0	4.0	11.0	1.9	0.0	4.0	11.0	1.9	0.0	4.0	11.0	1.9	0.0	4.0	11.0	1.9	0.0	5.0	10.0	2.2	0.0	4.0	11.0	1.9	0.0	4.0	11.0	1.9	0.0	4.0
477	4.0	11.0	1.9	0.0	5.0	10.0	2.2	0.0	5.0	10.0	2.2	0.0	4.0	11.0	1.9	0.0	4.0	11.0	1.9	0.0	4.0	11.0	1.9	0.0	5.0	10.0	2.2	0.0	4.0	11.0	1.9	0.0	4.0	11.0	1.9	0.0	5.0	10.0	2.2	0.0	4.0	11.0	1.9	0.0	4.0	11.0	1.9	0.0	4.0
478	4.0	11.0	1.9	0.0	4.0	11.0	1.9	0.0	4.0	11.0	1.9	0.0	4.0	11.0	1.9	0.0	5.0	10.0	2.2	0.0	4.0	11.0	1.9	0.0	5.0	10.0	2.2	0.0	5.0	10.0	2.2	0.0	4.0	11.0	1.9	0.0	5.0	10.0	2.2	0.0	4.0	11.0	1.9	0.0	4.0	11.0	1.9	0.0	4.0
479	4.0	11.0	1.9	0.0	4.0	11.0	1.9	0.0	4.0	11.0	1.9	0.0	4.0	11.0	1.9	0.0	4.0	11.0	1.9	0.0	5.0	10.0	2.2	0.0	5.0	10.0	2.2	0.0	4.0	11.0	1.9	0.0	5.0	10.0	2.2	0.0	4.0	11.0	1.9	0.0	4.0	11.0	1.9	0.0	5.0	10.0	2.2	0.0	4.0
480	4.0	11.0	1.9	0.0	4.0	11.0	1.9	0.0	4.0	11.0	1.9	0.0	4.0	11.0	1.9	0.0	4.0	11.0	1.9	0.0	4.0	11.0	1.9	0.0	4.0	11.0	1.9	0.0	5.0	10.0	2.2	0.0	4.0	11.0	1.9	0.0	5.0	10.0	2.2	0.0	4.0	11.0	1.9	0.0	4.0	11.0	1.9	0.0	5.0
481	4.0	11.0	1.9	0.0	4.0	11.0	1.9	0.0	5.0	10.0	2.2	0.0	4.0	11.0	1.9	0.0	4.0	11.0	1.9	0.0	5.0	10.0	2.2	0.0	4.0	11.0	1.9	0.0	4.0	11.0	1.9	0.0	4.0	11.0	1.9	0.0	4.0	11.0	1.9	0.0	4.0	11.0	1.9	0.0	4.0	11.0	1.9	0.0	4.0
482	4.0	11.0	1.9	0.0	4.0	11.0	1.9	0.0	4.0	11.0	1.9	0.0	4.0	11.0	1.9	0.0	4.0	11.0	1.9	0.0	5.0	10.0	2.2	0.0	4.0	11.0	1.9	0.0	4.0	11.0	1.9	0.0	4.0	11.0	1.9	0.0	4.0	11.0	1.9	0.0	4.0	11.0	1.9	0.0	5.0	10.0	2.2	0.0	4.0
483	5.0	10.0	2.2	0.0	5.0	10.0	2.2	0.0	4.0	11.0	1.9	0.0	4.0	11.0	1.9	0.0	5.0	10.0	2.2	0.0	4.0	11.0	1.9	0.0	4.0	11.0	1.9	0.0	5.0	10.0	2.2	0.0	4.0	11.0	1.9	0.0	4.0	11.0	1.9	0.0	5.0	10.0	2.2	0.0	4.0	11.0	1.9	0.0	4.0
484	5.0	10.0	2.2	0.0	4.0	11.0	1.9	0.0	4.0	11.0	1.9	0.0	5.0	10.0	2.2	0.0	4.0	11.0	1.9	0.0	4.0	11.0	1.9	0.0	4.0	11.0	1.9	0.0	4.0	11.0	1.9	0.0	4.0	11.0	1.9	0.0	4.0	11.0	1.9	0.0	4.0	11.0	1.9	0.0	5.0	10.0	2.2	0.0	4.0
485	5.0	10.0	2.2	0.0	5.0	10.0	2.2	0.0	5.0	10.0	2.2	0.0	5.0	10.0	2.2	0.0	4.0	11.0	1.9	0.0	5.0	10.0	2.2	0.0	4.0	11.0	1.9	0.0	4.0	11.0	1.9	0.0	4.0	11.0	1.9	0.0	4.0	11.0	1.9	0.0	5.0	10.0	2.2	0.0	4.0	11.0	1.9	0.0	4.0
486	4.0	11.0	1.9	0.0	4.0	11.0	1.9	0.0	4.0	11.0	1.9	0.0	5.0	10.0	2.2	0.0	5.0	10.0	2.2	0.0	4.0	11.0	1.9	0.0	4.0	11.0	1.9	0.0	5.0	10.0	2.2	0.0	4.0	11.0	1.9	0.0	4.0	11.0	1.9	0.0	4.0	11.0	1.9	0.0	4.0	11.0	1.9	0.0	4.0
487	4.0	11.0	1.9	0.0	4.0	11.0	1.9	0.0	5.0	10.0	2.2	0.0	4.0	11.0	1.9	0.0	4.0	11.0	1.9	0.0	5.0	10.0	2.2	0.0	4.0	11.0	1.9	0.0	4.0	11.0	1.9	0.0	5.0	10.0	2.2	0.0	4.0	11.0	1.9	0.0	4.0	11.0	1.9	0.0	4.0	11.0	1.9	0.0	4.0
488	4.0	11.0	1.9	0.0	4.0	11.0	1.9	0.0	4.0	11.0	1.9	0.0	4.0	11.0	1.9	0.0	4.0	11.0	1.9	0.0	5.0	10.0	2.2	0.0	5.0	10.0	2.2	0.0	4.0	11.0	1.9	0.0	4.0	11.0	1.9	0.0	4.0	11.0	1.9	0.0	4.0	11.0	1.9	0.0	4.0	11.0	1.9	0.0	4.0
489	4.0	11.0	1.9	0.0	4.0	11.0	1.9	0.0	5.0	10.0	2.2	0.0	4.0	11.0	1.9	0.0	4.0	11.0	1.9	0.0	4.0	11.0	1.9	0.0	5.0	10.0	2.2	0.0	4.0	11.0	1.9	0.0	5.0	10.0	2.2	0.0	5.0	10.0	2.2	0.0	5.0	10.0	2.2	0.0	4.0	11.0	1.9	0.0	4.0
490	4.0	11.0	1.9	0.0	5.0	10.0	2.2	0.0	5.0	10.0	2.2	0.0	5.0	10.0	2.2	0.0	5.0	10.0	2.2	0.0	4.0	11.0	1.9	0.0	4.0	11.0	1.9	0.0	4.0	11.0	1.9	0.0	4.0	11.0	1.9	0.0	5.0	10.0	2.2	0.0	4.0	11.0	1.9	0.0	4.0	11.0	1.9	0.0	4.0
491	4.0	11.0	1.9	0.0	4.0	11.0	1.9	0.0	4.0	11.0	1.9	0.0	5.0	10.0	2.2	0.0	4.0	11.0	1.9	0.0	5.0	10.0	2.2	0.0	5.0	10.0	2.2	0.0	5.0	10.0	2.2	0.0	4.0	11.0	1.9	0.0	5.0	10.0	2.2	0.0	4.0	11.0	1.9	0.0	5.0	10.0	2.2	0.0	4.0
492	4.0	11.0	1.9	0.0	4.0	11.0	1.9	0.0	4.0	11.0	1.9	0.0	4.0	11.0	1.9	0.0	4.0	11.0	1.9	0.0	4.0	11.0	1.9	0.0	4.0	11.0	1.9	0.0	4.0	11.0	1.9	0.0	4.0	11.0	1.9	0.0	4.0	11.0	1.9	0.0	5.0	10.0	2.2	0.0	5.0	10.0	2.2	0.0	4.0
493	4.0	11.0	1.9	0.0	5.0	10.0	2.2	0.0	4.0	11.0	1.9	0.0	4.0	11.0	1.9	0.0	5.0	10.0	2.2	0.0	4.0	11.0	1.9	0.0	4.0	11.0	1.9	0.0	4.0	11.0	1.9	0.0	4.0	11.0	1.9	0.0	4.0	11.0	1.9	0.0	4.0	11.0	1.9	0.0	5.0	10.0	2.2	0.0	5.0
494	4.0	11.0	1.9	0.0	4.0	11.0	1.9	0.0	4.0	11.0	1.9	0.0	4.0	11.0	1.9	0.0	5.0	10.0	2.2	0.0	4.0	11.0	1.9	0.0	4.0	11.0	1.9	0.0	4.0	11.0	1.9	0.0	4.0	11.0	1.9	0.0	5.0	10.0	2.2	0.0	5.0	10.0	2.2	0.0	4.0	11.0	1.9	0.0	4.0
495	4.0	11.0	1.9	0.0	5.0	10.0	2.2	0.0	4.0	11.0	1.9	0.0	5.0	10.0	2.2	0.0	4.0	11.0	1.9	0.0	4.0	11.0	1.9	0.0	4.0	11.0	1.9	0.0	4.0	11.0	1.9	0.0	4.0	11.0	1.9	0.0	4.0	11.0	1.9	0.0	4.0	11.0	1.9	0.0	4.0	11.0	1.9	0.0	4.0
496	4.0	11.0	1.9	0.0	4.0	11.0	1.9	0.0	5.0	10.0	2.2	0.0	4.0	11.0	1.9	0.0	5.0	10.0	2.2	0.0	4.0	11.0	1.9	0.0	5.0	10.0	2.2	0.0	4.0	11.0	1.9	0.0	4.0	11.0	1.9	0.0	5.0	10.0	2.2	0.0	4.0	11.0	1.9	0.0	4.0	11.0	1.9	0.0	4.0
497	4.0	11.0	1.9	0.0	5.0	10.0	2.2	0.0	4.0	11.0	1.9	0.0	4.0	11.0	1.9	0.0	4.0	11.0	1.9	0.0	4.0	11.0	1.9	0.0	4.0	11.0	1.9	0.0	4.0	11.0	1.9	0.0	4.0	11.0	1.9	0.0	4.0	11.0	1.9	0.0	5.0	10.0	2.2	0.0	4.0	11.0	1.9	0.0	4.0
498	4.0	11.0	1.9	0.0	5.0	10.0	2.2	0.0	4.0	11.0	1.9	0.0	4.0	11.0	1.9	0.0	4.0	11.0	1.9	0.0	4.0	11.0	1.9	0.0	4.0	11.0	1.9	0.0	4.0	11.0	1.9	0.0	5.0	10.0	2.2	0.0	4.0	11.0	1.9	0.0	4.0	11.0	1.9	0.0	5.0	10.0	2.2	0.0	4.0
499	4.0	11.0	1.9	0.0	4.0	11.0	1.9	0.0	4.0	11.0	1.9	0.0	4.0	11.0	1.9	0.0	4.0	11.0	1.9	0.0	5.0	10.0	2.2	0.0	5.0	10.0	2.2	0.0	4.0	11.0	1.9	0.0	4.0	11.0	1.9	0.0	5.0	10.0	2.2	0.0	4.0	11.0	1.9	0.0	4.0	11.0	1.9	0.0	5.0
500	4.0	11.0	1.9	0.0	4.0	11.0	1.9	0.0	5.0	10.0	2.2	0.0	4.0	11.0	1.9	0.0	4.0	11.0	1.9	0.0	4.0	11.0	1.9	0.0	4.0	11.0	1.9	0.0	5.0	10.0	2.2	0.0	5.0	10.0	2.2	0.0	5.0	10.0	2.2	0.0	4.0	11.0	1.9	0.0	4.0	11.0	1.9	0.0	4.0
501	4.0	11.0	1.9	0.0	5.0	10.0	2.2	0.0	5.0	10.0	2.2	0.0	4.0	11.0	1.9	0.0	4.0	11.0	1.9	0.0	4.0	11.0	1.9	0.0	5.0	10.0	2.2	0.0	4.0	11.0	1.9	0.0	4.0	11.0	1.9	0.0	4.0	11.0	1.9	0.0	4.0	11.0	1.9	0.0	4.0	11.0	1.9	0.0	5.0
502	4.0	11.0	1.9	0.0	4.0	11.0	1.9	0.0	5.0	11.0	1.93	0.0	4.0	11.0	1.9	0.0	4.0	11.0	1.9	0.0	4.0	11.0	1.9	0.0	4.0	11.0	1.9	0.0	4.0	11.0	1.9	0.0	4.0	11.0	1.9	0.0	4.0	11.0	1.9	0.0	4.0	11.0	1.9	0.0	4.0	11.0	1.9	0.0	4.0
503	4.0	11.0	1.9	0.0	5.0	11.0	1.93	0.0	4.0	11.0	1.9	0.0	4.0	11.0	1.9	0.0	5.0	11.0	1.93	0.0	4.0	11.0	1.9	0.0	4.0	11.0	1.9	0.0	4.0	11.0	1.9	0.0	4.0	11.0	1.9	0.0	5.0	11.0	1.93	0.0	4.0	11.0	1.9	0.0	4.0	11.0	1.9	0.0	4.0
504	5.0	11.0	1.93	0.0	4.0	11.0	1.9	0.0	4.0	11.0	1.9	0.0	4.0	11.0	1.9	0.0	4.0	11.0	1.9	0.0	4.0	11.0	1.9	0.0	4.0	11.0	1.9	0.0	4.0	11.0	1.9	0.0	4.0	11.0	1.9	0.0	4.0	11.0	1.9	0.0	4.0	11.0	1.9	0.0	4.0	11.0	1.9	0.0	5.0
505	5.0	11.0	1.93	0.0	4.0	11.0	1.9	0.0	4.0	11.0	1.9	0.0	4.0	11.0	1.9	0.0	5.0	11.0	1.93	0.0	4.0	11.0	1.9	0.0	4.0	11.0	1.9	0.0	5.0	11.0	1.93	0.0	4.0	11.0	1.9	0.0	5.0	11.0	1.93	0.0	5.0	11.0	1.93	0.0	4.0	11.0	1.9	0.0	4.0
506	4.0	11.0	1.9	0.0	5.0	11.0	1.93	0.0	5.0	11.0	1.93	0.0	4.0	11.0	1.9	0.0	4.0	11.0	1.9	0.0	5.0	11.0	1.93	0.0	4.0	11.0	1.9	0.0	4.0	11.0	1.9	0.0	4.0	11.0	1.9	0.0	4.0	11.0	1.9	0.0	4.0	11.0	1.9	0.0	4.0	11.0	1.9	0.0	5.0
507	5.0	11.0	1.93	0.0	4.0	11.0	1.9	0.0	4.0	11.0	1.9	0.0	4.0	11.0	1.9	0.0	5.0	11.0	1.93	0.0	4.0	11.0	1.9	0.0	4.0	11.0	1.9	0.0	5.0	11.0	1.93	0.0	4.0	11.0	1.9	0.0	5.0	11.0	1.93	0.0	4.0	11.0	1.9	0.0	4.0	11.0	1.9	0.0	4.0
508	4.0	11.0	1.9	0.0	5.0	11.0	1.93	0.0	4.0	11.0	1.9	0.0	4.0	11.0	1.9	0.0	4.0	11.0	1.9	0.0	5.0	11.0	1.93	0.0	4.0	11.0	1.9	0.0	4.0	11.0	1.9	0.0	4.0	11.0	1.9	0.0	4.0	11.0	1.9	0.0	5.0	11.0	1.93	0.0	5.0	11.0	1.93	0.0	4.0
509	4.0	11.0	1.9	0.0	5.0	11.0	1.93	0.0	4.0	11.0	1.9	0.0	4.0	11.0	1.9	0.0	4.0	11.0	1.9	0.0	4.0	11.0	1.9	0.0	4.0	11.0	1.9	0.0	4.0	11.0	1.9	0.0	4.0	11.0	1.9	0.0	4.0	11.0	1.9	0.0	4.0	11.0	1.9	0.0	4.0	11.0	1.9	0.0	4.0
510	4.0	11.0	1.9	0.0	4.0	11.0	1.9	0.0	4.0	11.0	1.9	0.0	4.0	11.0	1.9	0.0	5.0	11.0	1.93	0.0	4.0	11.0	1.9	0.0	5.0	11.0	1.93	0.0	4.0	11.0	1.9	0.0	5.0	11.0	1.93	0.0	4.0	11.0	1.9	0.0	5.0	11.0	1.93	0.0	4.0	11.0	1.9	0.0	4.0
511	4.0	11.0	1.9	0.0	4.0	11.0	1.9	0.0	4.0	11.0	1.9	0.0	4.0	11.0	1.9	0.0	4.0	11.0	1.9	0.0	4.0	11.0	1.9	0.0	5.0	11.0	1.93	0.0	4.0	11.0	1.9	0.0	4.0	11.0	1.9	0.0	4.0	11.0	1.9	0.0	4.0	11.0	1.9	0.0	5.0	11.0	1.93	0.0	4.0
512	4.0	11.0	1.9	0.0	5.0	11.0	1.93	0.0	5.0	11.0	1.93	0.0	4.0	11.0	1.9	0.0	4.0	11.0	1.9	0.0	4.0	11.0	1.9	0.0	5.0	11.0	1.93	0.0	4.0	11.0	1.9	0.0	4.0	11.0	1.9	0.0	4.0	11.0	1.9	0.0	4.0	11.0	1.9	0.0	4.0	11.0	1.9	0.0	4.0
513	4.0	11.0	1.9	0.0	4.0	11.0	1.9	0.0	4.0	11.0	1.9	0.0	4.0	11.0	1.9	0.0	4.0	11.0	1.9	0.0	4.0	11.0	1.9	0.0	4.0	11.0	1.9	0.0	4.0	11.0	1.9	0.0	4.0	11.0	1.9	0.0	4.0	11.0	1.9	0.0	5.0	11.0	1.93	0.0	4.0	11.0	1.9	0.0	5.0
514	4.0	11.0	1.9	0.0	4.0	11.0	1.9	0.0	4.0	11.0	1.9	0.0	4.0	11.0	1.9	0.0	5.0	11.0	1.93	0.0	4.0	11.0	1.9	0.0	4.0	11.0	1.9	0.0	5.0	11.0	1.93	0.0	5.0	11.0	1.93	0.0	4.0	11.0	1.9	0.0	5.0	11.0	1.93	0.0	4.0	11.0	1.9	0.0	4.0
515	4.0	11.0	1.9	0.0	4.0	11.0	1.9	0.0	5.0	11.0	1.93	0.0	4.0	11.0	1.9	0.0	5.0	11.0	1.93	0.0	5.0	11.0	1.93	0.0	4.0	11.0	1.9	0.0	5.0	11.0	1.93	0.0	5.0	11.0	1.93	0.0	4.0	11.0	1.9	0.0	5.0	11.0	1.93	0.0	5.0	11.0	1.93	0.0	4.0
516	4.0	11.0	1.9	0.0	4.0	11.0	1.9	0.0	4.0	11.0	1.9	0.0	5.0	11.0	1.93	0.0	4.0	11.0	1.9	0.0	4.0	11.0	1.9	0.0	4.0	11.0	1.9	0.0	4.0	11.0	1.9	0.0	4.0	11.0	1.9	0.0	4.0	11.0	1.9	0.0	4.0	11.0	1.9	0.0	5.0	11.0	1.93	0.0	4.0
517	4.0	11.0	1.9	0.0	5.0	11.0	1.93	0.0	4.0	11.0	1.9	0.0	4.0	11.0	1.9	0.0	4.0	11.0	1.9	0.0	4.0	11.0	1.9	0.0	4.0	11.0	1.9	0.0	5.0	11.0	1.93	0.0	4.0	11.0	1.9	0.0	4.0	11.0	1.9	0.0	5.0	11.0	1.93	0.0	4.0	11.0	1.9	0.0	4.0
518	4.0	11.0	1.9	0.0	4.0	11.0	1.9	0.0	4.0	11.0	1.9	0.0	4.0	11.0	1.9	0.0	4.0	11.0	1.9	0.0	4.0	11.0	1.9	0.0	5.0	11.0	1.93	0.0	4.0	11.0	1.9	0.0	4.0	11.0	1.9	0.0	4.0	11.0	1.9	0.0	4.0	11.0	1.9	0.0	4.0	11.0	1.9	0.0	4.0
519	4.0	11.0	1.9	0.0	4.0	11.0	1.9	0.0	4.0	11.0	1.9	0.0	4.0	11.0	1.9	0.0	4.0	11.0	1.9	0.0	4.0	11.0	1.9	0.0	4.0	11.0	1.9	0.0	4.0	11.0	1.9	0.0	4.0	11.0	1.9	0.0	5.0	11.0	1.93	0.0	4.0	11.0	1.9	0.0	4.0	11.0	1.9	0.0	5.0
520	5.0	11.0	1.93	0.0	4.0	11.0	1.9	0.0	4.0	11.0	1.9	0.0	4.0	11.0	1.9	0.0	4.0	11.0	1.9	0.0	4.0	11.0	1.9	0.0	5.0	11.0	1.93	0.0	4.0	11.0	1.9	0.0	5.0	11.0	1.93	0.0	5.0	11.0	1.93	0.0	4.0	11.0	1.9	0.0	4.0	11.0	1.9	0.0	4.0
521	4.0	11.0	1.9	0.0	4.0	11.0	1.9	0.0	5.0	11.0	1.93	0.0	4.0	11.0	1.9	0.0	4.0	11.0	1.9	0.0	4.0	11.0	1.9	0.0	5.0	11.0	1.93	0.0	5.0	11.0	1.93	0.0	4.0	11.0	1.9	0.0	5.0	11.0	1.93	0.0	4.0	11.0	1.9	0.0	4.0	11.0	1.9	0.0	5.0
522	4.0	11.0	1.9	0.0	5.0	11.0	1.93	0.0	4.0	11.0	1.9	0.0	4.0	11.0	1.9	0.0	5.0	11.0	1.93	0.0	4.0	11.0	1.9	0.0	4.0	11.0	1.9	0.0	4.0	11.0	1.9	0.0	4.0	11.0	1.9	0.0	4.0	11.0	1.9	0.0	4.0	11.0	1.9	0.0	4.0	11.0	1.9	0.0	4.0
523	4.0	11.0	1.9	0.0	4.0	11.0	1.9	0.0	4.0	11.0	1.9	0.0	5.0	11.0	1.93	0.0	4.0	11.0	1.9	0.0	4.0	11.0	1.9	0.0	4.0	11.0	1.9	0.0	4.0	11.0	1.9	0.0	5.0	11.0	1.93	0.0	5.0	11.0	1.93	0.0	4.0	11.0	1.9	0.0	4.0	11.0	1.9	0.0	4.0
524	4.0	11.0	1.9	0.0	4.0	11.0	1.9	0.0	5.0	11.0	1.93	0.0	4.0	11.0	1.9	0.0	4.0	11.0	1.9	0.0	4.0	11.0	1.9	0.0	4.0	11.0	1.9	0.0	4.0	11.0	1.9	0.0	4.0	11.0	1.9	0.0	4.0	11.0	1.9	0.0	5.0	11.0	1.93	0.0	5.0	11.0	1.93	0.0	4.0
525	4.0	11.0	1.9	0.0	4.0	11.0	1.9	0.0	5.0	11.0	1.93	0.0	4.0	11.0	1.9	0.0	4.0	11.0	1.9	0.0	4.0	11.0	1.9	0.0	4.0	11.0	1.9	0.0	4.0	11.0	1.9	0.0	4.0	11.0	1.9	0.0	4.0	11.0	1.9	0.0	4.0	11.0	1.9	0.0	5.0	11.0	1.93	0.0	4.0
526	4.0	11.0	1.9	0.0	5.0	11.0	1.93	0.0	4.0	11.0	1.9	0.0	4.0	11.0	1.9	0.0	4.0	11.0	1.9	0.0	4.0	11.0	1.9	0.0	5.0	11.0	1.93	0.0	4.0	11.0	1.9	0.0	4.0	11.0	1.9	0.0	4.0	11.0	1.9	0.0	4.0	11.0	1.9	0.0	4.0	11.0	1.9	0.0	5.0
527	4.0	11.0	1.9	0.0	4.0	11.0	1.9	0.0	4.0	11.0	1.9	0.0	4.0	11.0	1.9	0.0	4.0	11.0	1.9	0.0	4.0	11.0	1.9	0.0	4.0	11.0	1.9	0.0	4.0	11.0	1.9	0.0	4.0	11.0	1.9	0.0	4.0	11.0	1.9	0.0	5.0	11.0	1.93	0.0	4.0	11.0	1.9	0.0	4.0
528	4.0	11.0	1.9	0.0	4.0	11.0	1.9	0.0	4.0	11.0	1.9	0.0	4.0	11.0	1.9	0.0	4.0	11.0	1.9	0.0	5.0	11.0	1.93	0.0	4.0	11.0	1.9	0.0	4.0	11.0	1.9	0.0	5.0	11.0	1.93	0.0	4.0	11.0	1.9	0.0	4.0	11.0	1.9	0.0	4.0	11.0	1.9	0.0	5.0
529	5.0	11.0	1.93	0.0	4.0	11.0	1.9	0.0	5.0	11.0	1.93	0.0	4.0	11.0	1.9	0.0	4.0	11.0	1.9	0.0	4.0	11.0	1.9	0.0	4.0	11.0	1.9	0.0	4.0	11.0	1.9	0.0	4.0	11.0	1.9	0.0	5.0	11.0	1.93	0.0	4.0	11.0	1.9	0.0	4.0	11.0	1.9	0.0	4.0
530	4.0	11.0	1.9	0.0	4.0	11.0	1.9	0.0	4.0	11.0	1.9	0.0	5.0	11.0	1.93	0.0	4.0	11.0	1.9	0.0	4.0	11.0	1.9	0.0	4.0	11.0	1.9	0.0	4.0	11.0	1.9	0.0	4.0	11.0	1.9	0.0	4.0	11.0	1.9	0.0	5.0	11.0	1.93	0.0	4.0	11.0	1.9	0.0	4.0
531	4.0	11.0	1.9	0.0	4.0	11.0	1.9	0.0	4.0	11.0	1.9	0.0	4.0	11.0	1.9	0.0	4.0	11.0	1.9	0.0	4.0	11.0	1.9	0.0	4.0	11.0	1.9	0.0	4.0	11.0	1.9	0.0	5.0	11.0	1.93	0.0	4.0	11.0	1.9	0.0	4.0	11.0	1.9	0.0	4.0	11.0	1.9	0.0	4.0
532	5.0	11.0	1.93	0.0	4.0	11.0	1.9	0.0	4.0	11.0	1.9	0.0	4.0	11.0	1.9	0.0	5.0	11.0	1.93	0.0	4.0	11.0	1.9	0.0	5.0	11.0	1.93	0.0	4.0	11.0	1.9	0.0	4.0	11.0	1.9	0.0	4.0	11.0	1.9	0.0	5.0	11.0	1.93	0.0	5.0	11.0	1.93	0.0	5.0
533	5.0	11.0	1.93	0.0	4.0	11.0	1.9	0.0	4.0	11.0	1.9	0.0	4.0	11.0	1.9	0.0	5.0	11.0	1.93	0.0	4.0	11.0	1.9	0.0	4.0	11.0	1.9	0.0	4.0	11.0	1.9	0.0	4.0	11.0	1.9	0.0	5.0	11.0	1.93	0.0	4.0	11.0	1.9	0.0	5.0	11.0	1.93	0.0	5.0
534	4.0	11.0	1.9	0.0	4.0	11.0	1.9	0.0	4.0	11.0	1.9	0.0	4.0	11.0	1.9	0.0	5.0	11.0	1.93	0.0	4.0	11.0	1.9	0.0	4.0	11.0	1.9	0.0	4.0	11.0	1.9	0.0	4.0	11.0	1.9	0.0	4.0	11.0	1.9	0.0	4.0	11.0	1.9	0.0	4.0	11.0	1.9	0.0	4.0
535	4.0	11.0	1.9	0.0	4.0	11.0	1.9	0.0	4.0	11.0	1.9	0.0	4.0	11.0	1.9	0.0	4.0	11.0	1.9	0.0	4.0	11.0	1.9	0.0	4.0	11.0	1.9	0.0	4.0	11.0	1.9	0.0	4.0	11.0	1.9	0.0	5.0	11.0	1.93	0.0	4.0	11.0	1.9	0.0	5.0	11.0	1.93	0.0	4.0
536	5.0	11.0	1.93	0.0	4.0	11.0	1.9	0.0	4.0	11.0	1.9	0.0	4.0	11.0	1.9	0.0	5.0	11.0	1.93	0.0	4.0	11.0	1.9	0.0	4.0	11.0	1.9	0.0	4.0	11.0	1.9	0.0	4.0	11.0	1.9	0.0	4.0	11.0	1.9	0.0	4.0	11.0	1.9	0.0	4.0	11.0	1.9	0.0	5.0
537	4.0	11.0	1.9	0.0	5.0	11.0	1.93	0.0	5.0	11.0	1.93	0.0	5.0	11.0	1.93	0.0	5.0	11.0	1.93	0.0	4.0	11.0	1.9	0.0	4.0	11.0	1.9	0.0	4.0	11.0	1.9	0.0	4.0	11.0	1.9	0.0	4.0	11.0	1.9	0.0	4.0	11.0	1.9	0.0	5.0	11.0	1.93	0.0	4.0
538	4.0	11.0	1.9	0.0	4.0	11.0	1.9	0.0	4.0	11.0	1.9	0.0	4.0	11.0	1.9	0.0	4.0	11.0	1.9	0.0	4.0	11.0	1.9	0.0	4.0	11.0	1.9	0.0	5.0	11.0	1.93	0.0	4.0	11.0	1.9	0.0	4.0	11.0	1.9	0.0	4.0	11.0	1.9	0.0	4.0	11.0	1.9	0.0	4.0
539	4.0	11.0	1.9	0.0	4.0	11.0	1.9	0.0	4.0	11.0	1.9	0.0	4.0	11.0	1.9	0.0	5.0	11.0	1.93	0.0	5.0	11.0	1.93	0.0	5.0	11.0	1.93	0.0	4.0	11.0	1.9	0.0	4.0	11.0	1.9	0.0	4.0	11.0	1.9	0.0	4.0	11.0	1.9	0.0	5.0	11.0	1.93	0.0	4.0
540	4.0	11.0	1.9	0.0	4.0	11.0	1.9	0.0	4.0	11.0	1.9	0.0	4.0	11.0	1.9	0.0	4.0	11.0	1.9	0.0	5.0	11.0	1.93	0.0	4.0	11.0	1.9	0.0	4.0	11.0	1.9	0.0	4.0	11.0	1.9	0.0	5.0	11.0	1.93	0.0	4.0	11.0	1.9	0.0	4.0	11.0	1.9	0.0	4.0
541	4.0	11.0	1.9	0.0	4.0	11.0	1.9	0.0	4.0	11.0	1.9	0.0	4.0	11.0	1.9	0.0	5.0	11.0	1.93	0.0	4.0	11.0	1.9	0.0	5.0	11.0	1.93	0.0	4.0	11.0	1.9	0.0	4.0	11.0	1.9	0.0	4.0	11.0	1.9	0.0	4.0	11.0	1.9	0.0	4.0	11.0	1.9	0.0	4.0
542	4.0	11.0	1.9	0.0	4.0	11.0	1.9	0.0	4.0	11.0	1.9	0.0	4.0	11.0	1.9	0.0	4.0	11.0	1.9	0.0	4.0	11.0	1.9	0.0	4.0	11.0	1.9	0.0	4.0	11.0	1.9	0.0	4.0	11.0	1.9	0.0	5.0	11.0	1.93	0.0	5.0	11.0	1.93	0.0	5.0	11.0	1.93	0.0	4.0
543	4.0	11.0	1.9	0.0	4.0	11.0	1.9	0.0	4.0	11.0	1.9	0.0	4.0	11.0	1.9	0.0	4.0	11.0	1.9	0.0	4.0	11.0	1.9	0.0	4.0	11.0	1.9	0.0	4.0	11.0	1.9	0.0	5.0	11.0	1.93	0.0	5.0	11.0	1.93	0.0	4.0	11.0	1.9	0.0	4.0	11.0	1.9	0.0	5.0
544	4.0	11.0	1.9	0.0	4.0	11.0	1.9	0.0	4.0	11.0	1.9	0.0	4.0	11.0	1.9	0.0	4.0	11.0	1.9	0.0	4.0	11.0	1.9	0.0	4.0	11.0	1.9	0.0	5.0	11.0	1.93	0.0	4.0	11.0	1.9	0.0	4.0	11.0	1.9	0.0	4.0	11.0	1.9	0.0	5.0	11.0	1.93	0.0	4.0
545	4.0	11.0	1.9	0.0	4.0	11.0	1.9	0.0	4.0	11.0	1.9	0.0	5.0	11.0	1.93	0.0	4.0	11.0	1.9	0.0	5.0	11.0	1.93	0.0	4.0	11.0	1.9	0.0	4.0	11.0	1.9	0.0	4.0	11.0	1.9	0.0	5.0	11.0	1.93	0.0	4.0	11.0	1.9	0.0	4.0	11.0	1.9	0.0	4.0
546	4.0	11.0	1.9	0.0	4.0	11.0	1.9	0.0	5.0	11.0	1.93	0.0	4.0	11.0	1.9	0.0	4.0	11.0	1.9	0.0	5.0	11.0	1.93	0.0	4.0	11.0	1.9	0.0	4.0	11.0	1.9	0.0	4.0	11.0	1.9	0.0	5.0	11.0	1.93	0.0	4.0	11.0	1.9	0.0	4.0	11.0	1.9	0.0	4.0
547	5.0	11.0	1.93	0.0	4.0	11.0	1.9	0.0	4.0	11.0	1.9	0.0	4.0	11.0	1.9	0.0	4.0	11.0	1.9	0.0	5.0	11.0	1.93	0.0	4.0	11.0	1.9	0.0	5.0	11.0	1.93	0.0	5.0	11.0	1.93	0.0	4.0	11.0	1.9	0.0	4.0	11.0	1.9	0.0	4.0	11.0	1.9	0.0	4.0
548	4.0	11.0	1.9	0.0	4.0	11.0	1.9	0.0	4.0	11.0	1.9	0.0	5.0	11.0	1.93	0.0	5.0	11.0	1.93	0.0	4.0	11.0	1.9	0.0	4.0	11.0	1.9	0.0	4.0	11.0	1.9	0.0	4.0	11.0	1.9	0.0	4.0	11.0	1.9	0.0	4.0	11.0	1.9	0.0	4.0	11.0	1.9	0.0	4.0
549	4.0	11.0	1.9	0.0	4.0	11.0	1.9	0.0	4.0	11.0	1.9	0.0	4.0	11.0	1.9	0.0	4.0	11.0	1.9	0.0	4.0	11.0	1.9	0.0	5.0	11.0	1.93	0.0	4.0	11.0	1.9	0.0	4.0	11.0	1.9	0.0	4.0	11.0	1.9	0.0	5.0	11.0	1.93	0.0	4.0	11.0	1.9	0.0	5.0
550	5.0	11.0	1.93	0.0	4.0	11.0	1.9	0.0	4.0	11.0	1.9	0.0	5.0	11.0	1.93	0.0	4.0	11.0	1.9	0.0	4.0	11.0	1.9	0.0	4.0	11.0	1.9	0.0	4.0	11.0	1.9	0.0	4.0	11.0	1.9	0.0	5.0	11.0	1.93	0.0	4.0	11.0	1.9	0.0	4.0	11.0	1.9	0.0	5.0
551	4.0	11.0	1.9	0.0	4.0	11.0	1.9	0.0	4.0	11.0	1.9	0.0	4.0	11.0	1.9	0.0	5.0	11.0	1.93	0.0	4.0	11.0	1.9	0.0	5.0	11.0	1.93	0.0	4.0	11.0	1.9	0.0	5.0	11.0	1.93	0.0	4.0	11.0	1.9	0.0	4.0	11.0	1.9	0.0	4.0	11.0	1.9	0.0	4.0
552	4.0	11.0	1.9	0.0	4.0	11.0	1.9	0.0	4.0	11.0	1.9	0.0	4.0	11.0	1.9	0.0	5.0	11.0	1.93	0.0	5.0	11.0	1.93	0.0	4.0	11.0	1.9	0.0	4.0	11.0	1.9	0.0	4.0	11.0	1.9	0.0	4.0	11.0	1.9	0.0	4.0	11.0	1.9	0.0	4.0	11.0	1.9	0.0	4.0
553	5.0	11.0	1.93	0.0	4.0	11.0	1.9	0.0	4.0	11.0	1.9	0.0	5.0	11.0	1.93	0.0	4.0	11.0	1.9	0.0	4.0	11.0	1.9	0.0	5.0	11.0	1.93	0.0	4.0	11.0	1.9	0.0	4.0	11.0	1.9	0.0	4.0	11.0	1.9	0.0	4.0	11.0	1.9	0.0	5.0	11.0	1.93	0.0	4.0
554	5.0	11.0	1.93	0.0	4.0	11.0	1.9	0.0	4.0	11.0	1.9	0.0	4.0	11.0	1.9	0.0	4.0	11.0	1.9	0.0	4.0	11.0	1.9	0.0	4.0	11.0	1.9	0.0	4.0	11.0	1.9	0.0	4.0	11.0	1.9	0.0	4.0	11.0	1.9	0.0	4.0	11.0	1.9	0.0	4.0	11.0	1.9	0.0	4.0
555	5.0	11.0	1.93	0.0	5.0	11.0	1.93	0.0	4.0	11.0	1.9	0.0	4.0	11.0	1.9	0.0	4.0	11.0	1.9	0.0	4.0	11.0	1.9	0.0	4.0	11.0	1.9	0.0	5.0	11.0	1.93	0.0	4.0	11.0	1.9	0.0	4.0	11.0	1.9	0.0	4.0	11.0	1.9	0.0	4.0	11.0	1.9	0.0	4.0
556	4.0	11.0	1.9	0.0	5.0	11.0	1.93	0.0	4.0	11.0	1.9	0.0	4.0	11.0	1.9	0.0	4.0	11.0	1.9	0.0	4.0	11.0	1.9	0.0	4.0	11.0	1.9	0.0	4.0	11.0	1.9	0.0	4.0	11.0	1.9	0.0	4.0	11.0	1.9	0.0	4.0	11.0	1.9	0.0	5.0	11.0	1.93	0.0	4.0
557	4.0	11.0	1.9	0.0	5.0	11.0	1.93	0.0	4.0	11.0	1.9	0.0	4.0	11.0	1.9	0.0	5.0	11.0	1.93	0.0	4.0	11.0	1.9	0.0	4.0	11.0	1.9	0.0	4.0	11.0	1.9	0.0	4.0	11.0	1.9	0.0	4.0	11.0	1.9	0.0	5.0	11.0	1.93	0.0	4.0	11.0	1.9	0.0	4.0
558	5.0	11.0	1.93	0.0	5.0	11.0	1.93	0.0	4.0	11.0	1.9	0.0	4.0	11.0	1.9	0.0	4.0	11.0	1.9	0.0	4.0	11.0	1.9	0.0	4.0	11.0	1.9	0.0	4.0	11.0	1.9	0.0	4.0	11.0	1.9	0.0	4.0	11.0	1.9	0.0	4.0	11.0	1.9	0.0	5.0	11.0	1.93	0.0	5.0
559	4.0	11.0	1.9	0.0	4.0	11.0	1.9	0.0	4.0	11.0	1.9	0.0	4.0	11.0	1.9	0.0	4.0	11.0	1.9	0.0	4.0	11.0	1.9	0.0	5.0	11.0	1.93	0.0	4.0	11.0	1.9	0.0	4.0	11.0	1.9	0.0	4.0	11.0	1.9	0.0	4.0	11.0	1.9	0.0	5.0	11.0	1.93	0.0	5.0
560	5.0	11.0	1.93	0.0	4.0	11.0	1.9	0.0	4.0	11.0	1.9	0.0	5.0	11.0	1.93	0.0	4.0	11.0	1.9	0.0	4.0	11.0	1.9	0.0	4.0	11.0	1.9	0.0	4.0	11.0	1.9	0.0	4.0	11.0	1.9	0.0	5.0	11.0	1.93	0.0	4.0	11.0	1.9	0.0	4.0	11.0	1.9	0.0	4.0
561	4.0	11.0	1.9	0.0	4.0	11.0	1.9	0.0	5.0	11.0	1.93	0.0	4.0	11.0	1.9	0.0	4.0	11.0	1.9	0.0	4.0	11.0	1.9	0.0	5.0	11.0	1.93	0.0	4.0	11.0	1.9	0.0	4.0	11.0	1.9	0.0	4.0	11.0	1.9	0.0	4.0	11.0	1.9	0.0	4.0	11.0	1.9	0.0	4.0
562	4.0	11.0	1.9	0.0	5.0	11.0	1.93	0.0	4.0	11.0	1.9	0.0	4.0	11.0	1.9	0.0	5.0	11.0	1.93	0.0	5.0	11.0	1.93	0.0	4.0	11.0	1.9	0.0	4.0	11.0	1.9	0.0	4.0	11.0	1.9	0.0	4.0	11.0	1.9	0.0	5.0	11.0	1.93	0.0	4.0	11.0	1.9	0.0	5.0
563	4.0	11.0	1.9	0.0	4.0	11.0	1.9	0.0	5.0	11.0	1.93	0.0	5.0	11.0	1.93	0.0	4.0	11.0	1.9	0.0	5.0	11.0	1.93	0.0	4.0	11.0	1.9	0.0	4.0	11.0	1.9	0.0	4.0	11.0	1.9	0.0	4.0	11.0	1.9	0.0	4.0	11.0	1.9	0.0	4.0	11.0	1.9	0.0	4.0
564	4.0	11.0	1.9	0.0	5.0	11.0	1.93	0.0	5.0	11.0	1.93	0.0	5.0	11.0	1.93	0.0	5.0	11.0	1.93	0.0	4.0	11.0	1.9	0.0	4.0	11.0	1.9	0.0	5.0	11.0	1.93	0.0	4.0	11.0	1.9	0.0	4.0	11.0	1.9	0.0	4.0	11.0	1.9	0.0	4.0	11.0	1.9	0.0	4.0
565	4.0	11.0	1.9	0.0	4.0	11.0	1.9	0.0	4.0	11.0	1.9	0.0	5.0	11.0	1.93	0.0	4.0	11.0	1.9	0.0	4.0	11.0	1.9	0.0	5.0	11.0	1.93	0.0	4.0	11.0	1.9	0.0	5.0	11.0	1.93	0.0	4.0	11.0	1.9	0.0	4.0	11.0	1.9	0.0	4.0	11.0	1.9	0.0	4.0
566	4.0	11.0	1.9	0.0	4.0	11.0	1.9	0.0	4.0	11.0	1.9	0.0	4.0	11.0	1.9	0.0	4.0	11.0	1.9	0.0	4.0	11.0	1.9	0.0	5.0	11.0	1.93	0.0	5.0	11.0	1.93	0.0	4.0	11.0	1.9	0.0	5.0	11.0	1.93	0.0	4.0	11.0	1.9	0.0	4.0	11.0	1.9	0.0	4.0
567	5.0	11.0	1.93	0.0	4.0	11.0	1.9	0.0	4.0	11.0	1.9	0.0	4.0	11.0	1.9	0.0	4.0	11.0	1.9	0.0	4.0	11.0	1.9	0.0	4.0	11.0	1.9	0.0	4.0	11.0	1.9	0.0	5.0	11.0	1.93	0.0	4.0	11.0	1.9	0.0	4.0	11.0	1.9	0.0	5.0	11.0	1.93	0.0	4.0
568	4.0	11.0	1.9	0.0	4.0	11.0	1.9	0.0	4.0	11.0	1.9	0.0	4.0	11.0	1.9	0.0	4.0	11.0	1.9	0.0	4.0	11.0	1.9	0.0	4.0	11.0	1.9	0.0	4.0	11.0	1.9	0.0	4.0	11.0	1.9	0.0	4.0	11.0	1.9	0.0	4.0	11.0	1.9	0.0	5.0	11.0	1.93	0.0	4.0
569	5.0	11.0	1.93	0.0	4.0	11.0	1.9	0.0	4.0	11.0	1.9	0.0	4.0	11.0	1.9	0.0	5.0	11.0	1.93	0.0	4.0	11.0	1.9	0.0	4.0	11.0	1.9	0.0	4.0	11.0	1.9	0.0	5.0	11.0	1.93	0.0	4.0	11.0	1.9	0.0	4.0	11.0	1.9	0.0	4.0	11.0	1.9	0.0	4.0
570	4.0	11.0	1.9	0.0	5.0	11.0	1.93	0.0	4.0	11.0	1.9	0.0	4.0	11.0	1.9	0.0	4.0	11.0	1.9	0.0	4.0	11.0	1.9	0.0	5.0	11.0	1.93	0.0	4.0	11.0	1.9	0.0	4.0	11.0	1.9	0.0	4.0	11.0	1.9	0.0	5.0	11.0	1.93	0.0	4.0	11.0	1.9	0.0	4.0
571	4.0	11.0	1.9	0.0	4.0	11.0	1.9	0.0	4.0	11.0	1.9	0.0	5.0	11.0	1.93	0.0	4.0	11.0	1.9	0.0	5.0	11.0	1.93	0.0	4.0	11.0	1.9	0.0	4.0	11.0	1.9	0.0	4.0	11.0	1.9	0.0	5.0	11.0	1.93	0.0	4.0	11.0	1.9	0.0	5.0	11.0	1.93	0.0	4.0
572	5.0	11.0	1.93	0.0	4.0	11.0	1.9	0.0	5.0	11.0	1.93	0.0	5.0	11.0	1.93	0.0	4.0	11.0	1.9	0.0	5.0	11.0	1.93	0.0	4.0	11.0	1.9	0.0	4.0	11.0	1.9	0.0	4.0	11.0	1.9	0.0	4.0	11.0	1.9	0.0	5.0	11.0	1.93	0.0	4.0	11.0	1.9	0.0	4.0
573	4.0	11.0	1.9	0.0	5.0	11.0	1.93	0.0	4.0	11.0	1.9	0.0	4.0	11.0	1.9	0.0	4.0	11.0	1.9	0.0	5.0	11.0	1.93	0.0	5.0	11.0	1.93	0.0	4.0	11.0	1.9	0.0	4.0	11.0	1.9	0.0	4.0	11.0	1.9	0.0	4.0	11.0	1.9	0.0	4.0	11.0	1.9	0.0	4.0
574	4.0	11.0	1.9	0.0	4.0	11.0	1.9	0.0	4.0	11.0	1.9	0.0	4.0	11.0	1.9	0.0	5.0	11.0	1.93	0.0	4.0	11.0	1.9	0.0	4.0	11.0	1.9	0.0	5.0	11.0	1.93	0.0	4.0	11.0	1.9	0.0	4.0	11.0	1.9	0.0	4.0	11.0	1.9	0.0	4.0	11.0	1.9	0.0	4.0
575	5.0	11.0	1.93	0.0	4.0	11.0	1.9	0.0	4.0	11.0	1.9	0.0	4.0	11.0	1.9	0.0	4.0	11.0	1.9	0.0	5.0	11.0	1.93	0.0	4.0	11.0	1.9	0.0	4.0	11.0	1.9	0.0	4.0	11.0	1.9	0.0	5.0	11.0	1.93	0.0	4.0	11.0	1.9	0.0	4.0	11.0	1.9	0.0	4.0
576	4.0	11.0	1.9	0.0	4.0	11.0	1.9	0.0	4.0	11.0	1.9	0.0	4.0	11.0	1.9	0.0	4.0	11.0	1.9	0.0	5.0	11.0	1.93	0.0	4.0	11.0	1.9	0.0	4.0	11.0	1.9	0.0	4.0	11.0	1.9	0.0	4.0	11.0	1.9	0.0	4.0	11.0	1.9	0.0	4.0	11.0	1.9	0.0	4.0
577	4.0	11.0	1.9	0.0	4.0	11.0	1.9	0.0	5.0	11.0	1.93	0.0	5.0	11.0	1.93	0.0	4.0	11.0	1.9	0.0	4.0	11.0	1.9	0.0	4.0	11.0	1.9	0.0	4.0	11.0	1.9	0.0	4.0	11.0	1.9	0.0	4.0	11.0	1.9	0.0	4.0	11.0	1.9	0.0	4.0	11.0	1.9	0.0	4.0
578	4.0	11.0	1.9	0.0	4.0	11.0	1.9	0.0	5.0	11.0	1.93	0.0	5.0	11.0	1.93	0.0	4.0	11.0	1.9	0.0	4.0	11.0	1.9	0.0	4.0	11.0	1.9	0.0	4.0	11.0	1.9	0.0	4.0	11.0	1.9	0.0	5.0	11.0	1.93	0.0	4.0	11.0	1.9	0.0	4.0	11.0	1.9	0.0	4.0
579	4.0	11.0	1.9	0.0	5.0	11.0	1.93	0.0	4.0	11.0	1.9	0.0	5.0	11.0	1.93	0.0	4.0	11.0	1.9	0.0	4.0	11.0	1.9	0.0	5.0	11.0	1.93	0.0	5.0	11.0	1.93	0.0	4.0	11.0	1.9	0.0	4.0	11.0	1.9	0.0	4.0	11.0	1.9	0.0	5.0	11.0	1.93	0.0	4.0
580	4.0	11.0	1.9	0.0	4.0	11.0	1.9	0.0	5.0	11.0	1.93	0.0	4.0	11.0	1.9	0.0	4.0	11.0	1.9	0.0	4.0	11.0	1.9	0.0	5.0	11.0	1.93	0.0	4.0	11.0	1.9	0.0	4.0	11.0	1.9	0.0	4.0	11.0	1.9	0.0	4.0	11.0	1.9	0.0	4.0	11.0	1.9	0.0	5.0
581	4.0	11.0	1.9	0.0	4.0	11.0	1.9	0.0	4.0	11.0	1.9	0.0	4.0	11.0	1.9	0.0	5.0	11.0	1.93	0.0	4.0	11.0	1.9	0.0	5.0	11.0	1.93	0.0	4.0	11.0	1.9	0.0	4.0	11.0	1.9	0.0	4.0	11.0	1.9	0.0	4.0	11.0	1.9	0.0	4.0	11.0	1.9	0.0	5.0
582	4.0	11.0	1.9	0.0	4.0	11.0	1.9	0.0	4.0	11.0	1.9	0.0	4.0	11.0	1.9	0.0	5.0	11.0	1.93	0.0	4.0	11.0	1.9	0.0	5.0	11.0	1.93	0.0	4.0	11.0	1.9	0.0	4.0	11.0	1.9	0.0	5.0	11.0	1.93	0.0	4.0	11.0	1.9	0.0	5.0	11.0	1.93	0.0	4.0
583	4.0	11.0	1.9	0.0	4.0	11.0	1.9	0.0	4.0	11.0	1.9	0.0	4.0	11.0	1.9	0.0	4.0	11.0	1.9	0.0	4.0	11.0	1.9	0.0	4.0	11.0	1.9	0.0	4.0	11.0	1.9	0.0	4.0	11.0	1.9	0.0	5.0	11.0	1.93	0.0	5.0	11.0	1.93	0.0	4.0	11.0	1.9	0.0	4.0
584	5.0	11.0	1.93	0.0	4.0	11.0	1.9	0.0	4.0	11.0	1.9	0.0	4.0	11.0	1.9	0.0	4.0	11.0	1.9	0.0	5.0	11.0	1.93	0.0	4.0	11.0	1.9	0.0	5.0	11.0	1.93	0.0	4.0	11.0	1.9	0.0	5.0	11.0	1.93	0.0	5.0	11.0	1.93	0.0	5.0	11.0	1.93	0.0	4.0
585	4.0	11.0	1.9	0.0	5.0	11.0	1.93	0.0	4.0	11.0	1.9	0.0	4.0	11.0	1.9	0.0	5.0	11.0	1.93	0.0	4.0	11.0	1.9	0.0	5.0	11.0	1.93	0.0	5.0	11.0	1.93	0.0	4.0	11.0	1.9	0.0	4.0	11.0	1.9	0.0	4.0	11.0	1.9	0.0	5.0	11.0	1.93	0.0	4.0
586	4.0	11.0	1.9	0.0	5.0	11.0	1.93	0.0	5.0	11.0	1.93	0.0	4.0	11.0	1.9	0.0	4.0	11.0	1.9	0.0	5.0	11.0	1.93	0.0	4.0	11.0	1.9	0.0	5.0	11.0	1.93	0.0	4.0	11.0	1.9	0.0	4.0	11.0	1.9	0.0	5.0	11.0	1.93	0.0	5.0	11.0	1.93	0.0	4.0
587	5.0	11.0	1.93	0.0	4.0	11.0	1.9	0.0	5.0	11.0	1.93	0.0	4.0	11.0	1.9	0.0	4.0	11.0	1.9	0.0	4.0	11.0	1.9	0.0	4.0	11.0	1.9	0.0	4.0	11.0	1.9	0.0	5.0	11.0	1.93	0.0	4.0	11.0	1.9	0.0	4.0	11.0	1.9	0.0	4.0	11.0	1.9	0.0	4.0
588	4.0	11.0	1.9	0.0	4.0	11.0	1.9	0.0	4.0	11.0	1.9	0.0	4.0	11.0	1.9	0.0	4.0	11.0	1.9	0.0	4.0	11.0	1.9	0.0	5.0	11.0	1.93	0.0	4.0	11.0	1.9	0.0	5.0	11.0	1.93	0.0	4.0	11.0	1.9	0.0	4.0	11.0	1.9	0.0	4.0	11.0	1.9	0.0	4.0
589	5.0	11.0	1.93	0.0	4.0	11.0	1.9	0.0	4.0	11.0	1.9	0.0	5.0	11.0	1.93	0.0	4.0	11.0	1.9	0.0	5.0	11.0	1.93	0.0	4.0	11.0	1.9	0.0	4.0	11.0	1.9	0.0	4.0	11.0	1.9	0.0	4.0	11.0	1.9	0.0	4.0	11.0	1.9	0.0	4.0	11.0	1.9	0.0	4.0
590	4.0	11.0	1.9	0.0	4.0	11.0	1.9	0.0	5.0	11.0	1.93	0.0	4.0	11.0	1.9	0.0	4.0	11.0	1.9	0.0	4.0	11.0	1.9	0.0	4.0	11.0	1.9	0.0	4.0	11.0	1.9	0.0	4.0	11.0	1.9	0.0	5.0	11.0	1.93	0.0	5.0	11.0	1.93	0.0	4.0	11.0	1.9	0.0	4.0
591	4.0	11.0	1.9	0.0	4.0	11.0	1.9	0.0	4.0	11.0	1.9	0.0	4.0	11.0	1.9	0.0	4.0	11.0	1.9	0.0	4.0	11.0	1.9	0.0	5.0	11.0	1.93	0.0	4.0	11.0	1.9	0.0	5.0	11.0	1.93	0.0	4.0	11.0	1.9	0.0	4.0	11.0	1.9	0.0	4.0	11.0	1.9	0.0	5.0
592	4.0	11.0	1.9	0.0	4.0	11.0	1.9	0.0	4.0	11.0	1.9	0.0	4.0	11.0	1.9	0.0	5.0	11.0	1.93	0.0	4.0	11.0	1.9	0.0	4.0	11.0	1.9	0.0	4.0	11.0	1.9	0.0	4.0	11.0	1.9	0.0	4.0	11.0	1.9	0.0	4.0	11.0	1.9	0.0	5.0	11.0	1.93	0.0	4.0
593	4.0	11.0	1.9	0.0	4.0	11.0	1.9	0.0	4.0	11.0	1.9	0.0	4.0	11.0	1.9	0.0	4.0	11.0	1.9	0.0	4.0	11.0	1.9	0.0	5.0	11.0	1.93	0.0	4.0	11.0	1.9	0.0	4.0	11.0	1.9	0.0	5.0	11.0	1.93	0.0	4.0	11.0	1.9	0.0	5.0	11.0	1.93	0.0	4.0
594	4.0	11.0	1.9	0.0	4.0	11.0	1.9	0.0	5.0	11.0	1.93	0.0	4.0	11.0	1.9	0.0	5.0	11.0	1.93	0.0	4.0	11.0	1.9	0.0	4.0	11.0	1.9	0.0	4.0	11.0	1.9	0.0	5.0	11.0	1.93	0.0	4.0	11.0	1.9	0.0	4.0	11.0	1.9	0.0	4.0	11.0	1.9	0.0	4.0
595	4.0	11.0	1.9	0.0	4.0	11.0	1.9	0.0	4.0	11.0	1.9	0.0	5.0	11.0	1.93	0.0	4.0	11.0	1.9	0.0	4.0	11.0	1.9	0.0	5.0	11.0	1.93	0.0	4.0	11.0	1.9	0.0	4.0	11.0	1.9	0.0	4.0	11.0	1.9	0.0	4.0	11.0	1.9	0.0	5.0	11.0	1.93	0.0	5.0
596	4.0	11.0	1.9	0.0	4.0	11.0	1.9	0.0	5.0	11.0	1.93	0.0	4.0	11.0	1.9	0.0	5.0	11.0	1.93	0.0	4.0	11.0	1.9	0.0	4.0	11.0	1.9	0.0	4.0	11.0	1.9	0.0	4.0	11.0	1.9	0.0	4.0	11.0	1.9	0.0	4.0	11.0	1.9	0.0	4.0	11.0	1.9	0.0	5.0
597	4.0	11.0	1.9	0.0	4.0	11.0	1.9	0.0	4.0	11.0	1.9	0.0	5.0	11.0	1.93	0.0	5.0	11.0	1.93	0.0	4.0	11.0	1.9	0.0	4.0	11.0	1.9	0.0	4.0	11.0	1.9	0.0	4.0	11.0	1.9	0.0	4.0	11.0	1.9	0.0	5.0	11.0	1.93	0.0	4.0	11.0	1.9	0.0	4.0
598	4.0	11.0	1.9	0.0	4.0	11.0	1.9	0.0	4.0	11.0	1.9	0.0	5.0	11.0	1.93	0.0	4.0	11.0	1.9	0.0	4.0	11.0	1.9	0.0	5.0	11.0	1.93	0.0	5.0	11.0	1.93	0.0	4.0	11.0	1.9	0.0	4.0	11.0	1.9	0.0	4.0	11.0	1.9	0.0	4.0	11.0	1.9	0.0	4.0
599	4.0	11.0	1.9	0.0	4.0	11.0	1.9	0.0	4.0	11.0	1.9	0.0	4.0	11.0	1.9	0.0	4.0	11.0	1.9	0.0	5.0	11.0	1.93	0.0	4.0	11.0	1.9	0.0	4.0	11.0	1.9	0.0	4.0	11.0	1.9	0.0	5.0	11.0	1.93	0.0	4.0	11.0	1.9	0.0	5.0	11.0	1.93	0.0	4.0
600	4.0	11.0	1.9	0.0	5.0	11.0	1.93	0.0	4.0	11.0	1.9	0.0	4.0	11.0	1.9	0.0	4.0	11.0	1.9	0.0	4.0	11.0	1.9	0.0	4.0	11.0	1.9	0.0	4.0	11.0	1.9	0.0	5.0	11.0	1.93	0.0	4.0	11.0	1.9	0.0	4.0	11.0	1.9	0.0	4.0	11.0	1.9	0.0	4.0
601	4.0	11.0	1.9	0.0	4.0	11.0	1.9	0.0	4.0	11.0	1.9	0.0	4.0	11.0	1.9	0.0	4.0	11.0	1.9	0.0	4.0	11.0	1.9	0.0	4.0	11.0	1.9	0.0	5.0	11.0	1.93	0.0	5.0	11.0	1.93	0.0	4.0	11.0	1.9	0.0	4.0	11.0	1.9	0.0	4.0	11.0	1.9	0.0	5.0
602	4.0	11.0	1.9	0.0	4.0	11.0	1.9	0.0	5.0	11.0	1.93	0.0	5.0	11.0	1.93	0.0	4.0	11.0	1.9	0.0	4.0	11.0	1.9	0.0	4.0	11.0	1.9	0.0	4.0	11.0	1.9	0.0	5.0	11.0	1.93	0.0	4.0	11.0	1.9	0.0	5.0	11.0	1.93	0.0	4.0	11.0	1.9	0.0	5.0
603	4.0	11.0	1.9	0.0	5.0	11.0	1.93	0.0	4.0	11.0	1.9	0.0	5.0	11.0	1.93	0.0	4.0	11.0	1.9	0.0	5.0	11.0	1.93	0.0	5.0	11.0	1.93	0.0	4.0	11.0	1.9	0.0	4.0	11.0	1.9	0.0	4.0	11.0	1.9	0.0	4.0	11.0	1.9	0.0	4.0	11.0	1.9	0.0	4.0
604	5.0	11.0	1.93	0.0	4.0	11.0	1.9	0.0	4.0	11.0	1.9	0.0	5.0	11.0	1.93	0.0	5.0	11.0	1.93	0.0	4.0	11.0	1.9	0.0	4.0	11.0	1.9	0.0	4.0	11.0	1.9	0.0	4.0	11.0	1.9	0.0	4.0	11.0	1.9	0.0	4.0	11.0	1.9	0.0	4.0	11.0	1.9	0.0	4.0
605	4.0	11.0	1.9	0.0	4.0	11.0	1.9	0.0	4.0	11.0	1.9	0.0	4.0	11.0	1.9	0.0	4.0	11.0	1.9	0.0	4.0	11.0	1.9	0.0	4.0	11.0	1.9	0.0	4.0	11.0	1.9	0.0	4.0	11.0	1.9	0.0	4.0	11.0	1.9	0.0	4.0	11.0	1.9	0.0	4.0	11.0	1.9	0.0	5.0
606	4.0	11.0	1.9	0.0	4.0	11.0	1.9	0.0	4.0	11.0	1.9	0.0	4.0	11.0	1.9	0.0	5.0	11.0	1.93	0.0	4.0	11.0	1.9	0.0	4.0	11.0	1.9	0.0	4.0	11.0	1.9	0.0	5.0	11.0	1.93	0.0	5.0	11.0	1.93	0.0	4.0	11.0	1.9	0.0	5.0	11.0	1.93	0.0	4.0
607	5.0	11.0	1.93	0.0	4.0	11.0	1.9	0.0	5.0	11.0	1.93	0.0	4.0	11.0	1.9	0.0	5.0	11.0	1.93	0.0	5.0	11.0	1.93	0.0	5.0	11.0	1.93	0.0	4.0	11.0	1.9	0.0	4.0	11.0	1.9	0.0	4.0	11.0	1.9	0.0	4.0	11.0	1.9	0.0	4.0	11.0	1.9	0.0	4.0
608	5.0	11.0	1.93	0.0	4.0	11.0	1.9	0.0	4.0	11.0	1.9	0.0	4.0	11.0	1.9	0.0	4.0	11.0	1.9	0.0	4.0	11.0	1.9	0.0	4.0	11.0	1.9	0.0	4.0	11.0	1.9	0.0	5.0	11.0	1.93	0.0	5.0	11.0	1.93	0.0	4.0	11.0	1.9	0.0	4.0	11.0	1.9	0.0	4.0
609	4.0	11.0	1.9	0.0	4.0	11.0	1.9	0.0	5.0	11.0	1.93	0.0	5.0	11.0	1.93	0.0	4.0	11.0	1.9	0.0	4.0	11.0	1.9	0.0	4.0	11.0	1.9	0.0	4.0	11.0	1.9	0.0	5.0	11.0	1.93	0.0	4.0	11.0	1.9	0.0	5.0	11.0	1.93	0.0	4.0	11.0	1.9	0.0	4.0
610	4.0	11.0	1.9	0.0	5.0	11.0	1.93	0.0	4.0	11.0	1.9	0.0	4.0	11.0	1.9	0.0	5.0	11.0	1.93	0.0	4.0	11.0	1.9	0.0	5.0	11.0	1.93	0.0	4.0	11.0	1.9	0.0	4.0	11.0	1.9	0.0	4.0	11.0	1.9	0.0	4.0	11.0	1.9	0.0	4.0	11.0	1.9	0.0	4.0
611	5.0	11.0	1.93	0.0	4.0	11.0	1.9	0.0	4.0	11.0	1.9	0.0	4.0	11.0	1.9	0.0	4.0	11.0	1.9	0.0	4.0	11.0	1.9	0.0	4.0	11.0	1.9	0.0	4.0	11.0	1.9	0.0	4.0	11.0	1.9	0.0	5.0	11.0	1.93	0.0	4.0	11.0	1.9	0.0	4.0	11.0	1.9	0.0	4.0
612	4.0	11.0	1.9	0.0	4.0	11.0	1.9	0.0	5.0	11.0	1.93	0.0	4.0	11.0	1.9	0.0	4.0	11.0	1.9	0.0	4.0	11.0	1.9	0.0	5.0	11.0	1.93	0.0	5.0	11.0	1.93	0.0	4.0	11.0	1.9	0.0	5.0	11.0	1.93	0.0	4.0	11.0	1.9	0.0	5.0	11.0	1.93	0.0	4.0
613	4.0	11.0	1.9	0.0	5.0	11.0	1.93	0.0	4.0	11.0	1.9	0.0	5.0	11.0	1.93	0.0	4.0	11.0	1.9	0.0	5.0	11.0	1.93	0.0	4.0	11.0	1.9	0.0	4.0	11.0	1.9	0.0	5.0	11.0	1.93	0.0	4.0	11.0	1.9	0.0	4.0	11.0	1.9	0.0	4.0	11.0	1.9	0.0	4.0
614	4.0	11.0	1.9	0.0	4.0	11.0	1.9	0.0	5.0	11.0	1.93	0.0	4.0	11.0	1.9	0.0	5.0	11.0	1.93	0.0	4.0	11.0	1.9	0.0	4.0	11.0	1.9	0.0	5.0	11.0	1.93	0.0	4.0	11.0	1.9	0.0	4.0	11.0	1.9	0.0	4.0	11.0	1.9	0.0	5.0	11.0	1.93	0.0	4.0
615	5.0	11.0	1.93	0.0	5.0	11.0	1.93	0.0	4.0	11.0	1.9	0.0	4.0	11.0	1.9	0.0	4.0	11.0	1.9	0.0	4.0	11.0	1.9	0.0	4.0	11.0	1.9	0.0	5.0	11.0	1.93	0.0	5.0	11.0	1.93	0.0	4.0	11.0	1.9	0.0	4.0	11.0	1.9	0.0	5.0	11.0	1.93	0.0	4.0
616	4.0	11.0	1.9	0.0	4.0	11.0	1.9	0.0	4.0	11.0	1.9	0.0	5.0	11.0	1.93	0.0	4.0	11.0	1.9	0.0	4.0	11.0	1.9	0.0	4.0	11.0	1.9	0.0	4.0	11.0	1.9	0.0	4.0	11.0	1.9	0.0	4.0	11.0	1.9	0.0	4.0	11.0	1.9	0.0	4.0	11.0	1.9	0.0	5.0
617	4.0	11.0	1.9	0.0	4.0	11.0	1.9	0.0	5.0	11.0	1.93	0.0	5.0	11.0	1.93	0.0	4.0	11.0	1.9	0.0	4.0	11.0	1.9	0.0	4.0	11.0	1.9	0.0	4.0	11.0	1.9	0.0	4.0	11.0	1.9	0.0	4.0	11.0	1.9	0.0	4.0	11.0	1.9	0.0	4.0	11.0	1.9	0.0	5.0
618	4.0	11.0	1.9	0.0	4.0	11.0	1.9	0.0	4.0	11.0	1.9	0.0	4.0	11.0	1.9	0.0	4.0	11.0	1.9	0.0	4.0	11.0	1.9	0.0	5.0	11.0	1.93	0.0	4.0	11.0	1.9	0.0	4.0	11.0	1.9	0.0	5.0	11.0	1.93	0.0	5.0	11.0	1.93	0.0	4.0	11.0	1.9	0.0	4.0
619	4.0	11.0	1.9	0.0	4.0	11.0	1.9	0.0	5.0	11.0	1.93	0.0	4.0	11.0	1.9	0.0	4.0	11.0	1.9	0.0	4.0	11.0	1.9	0.0	4.0	11.0	1.9	0.0	5.0	11.0	1.93	0.0	4.0	11.0	1.9	0.0	4.0	11.0	1.9	0.0	4.0	11.0	1.9	0.0	4.0	11.0	1.9	0.0	4.0
620	4.0	11.0	1.9	0.0	4.0	11.0	1.9	0.0	4.0	11.0	1.9	0.0	4.0	11.0	1.9	0.0	4.0	11.0	1.9	0.0	4.0	11.0	1.9	0.0	4.0	11.0	1.9	0.0	5.0	11.0	1.93	0.0	4.0	11.0	1.9	0.0	4.0	11.0	1.9	0.0	4.0	11.0	1.9	0.0	4.0	11.0	1.9	0.0	5.0
621	4.0	11.0	1.9	0.0	4.0	11.0	1.9	0.0	4.0	11.0	1.9	0.0	5.0	11.0	1.93	0.0	4.0	11.0	1.9	0.0	4.0	11.0	1.9	0.0	5.0	11.0	1.93	0.0	4.0	11.0	1.9	0.0	4.0	11.0	1.9	0.0	4.0	11.0	1.9	0.0	4.0	11.0	1.9	0.0	5.0	11.0	1.93	0.0	4.0
622	4.0	11.0	1.9	0.0	4.0	11.0	1.9	0.0	4.0	11.0	1.9	0.0	4.0	11.0	1.9	0.0	4.0	11.0	1.9	0.0	4.0	11.0	1.9	0.0	4.0	11.0	1.9	0.0	4.0	11.0	1.9	0.0	4.0	11.0	1.9	0.0	4.0	11.0	1.9	0.0	4.0	11.0	1.9	0.0	5.0	11.0	1.93	0.0	5.0
623	5.0	11.0	1.93	0.0	5.0	11.0	1.93	0.0	5.0	11.0	1.93	0.0	4.0	11.0	1.9	0.0	5.0	11.0	1.93	0.0	4.0	11.0	1.9	0.0	4.0	11.0	1.9	0.0	4.0	11.0	1.9	0.0	4.0	11.0	1.9	0.0	4.0	11.0	1.9	0.0	4.0	11.0	1.9	0.0	4.0	11.0	1.9	0.0	4.0
624	5.0	11.0	1.93	0.0	5.0	11.0	1.93	0.0	4.0	11.0	1.9	0.0	4.0	11.0	1.9	0.0	4.0	11.0	1.9	0.0	4.0	11.0	1.9	0.0	4.0	11.0	1.9	0.0	4.0	11.0	1.9	0.0	4.0	11.0	1.9	0.0	5.0	11.0	1.93	0.0	4.0	11.0	1.9	0.0	5.0	11.0	1.93	0.0	4.0
625	4.0	11.0	1.9	0.0	4.0	11.0	1.9	0.0	4.0	11.0	1.9	0.0	4.0	11.0	1.9	0.0	4.0	11.0	1.9	0.0	4.0	11.0	1.9	0.0	4.0	11.0	1.9	0.0	4.0	11.0	1.9	0.0	4.0	11.0	1.9	0.0	5.0	11.0	1.93	0.0	4.0	11.0	1.9	0.0	5.0	11.0	1.93	0.0	5.0
626	4.0	11.0	1.9	0.0	4.0	11.0	1.9	0.0	4.0	11.0	1.9	0.0	4.0	11.0	1.9	0.0	4.0	11.0	1.9	0.0	5.0	11.0	1.93	0.0	4.0	11.0	1.9	0.0	4.0	11.0	1.9	0.0	4.0	11.0	1.9	0.0	4.0	11.0	1.9	0.0	4.0	11.0	1.9	0.0	4.0	11.0	1.9	0.0	5.0
627	4.0	11.0	1.9	0.0	5.0	11.0	1.93	0.0	4.0	11.0	1.9	0.0	4.0	11.0	1.9	0.0	4.0	11.0	1.9	0.0	4.0	11.0	1.9	0.0	4.0	11.0	1.9	0.0	4.0	11.0	1.9	0.0	4.0	11.0	1.9	0.0	4.0	11.0	1.9	0.0	4.0	11.0	1.9	0.0	4.0	11.0	1.9	0.0	5.0
628	4.0	11.0	1.9	0.0	4.0	11.0	1.9	0.0	5.0	11.0	1.93	0.0	4.0	11.0	1.9	0.0	5.0	11.0	1.93	0.0	4.0	11.0	1.9	0.0	4.0	11.0	1.9	0.0	4.0	11.0	1.9	0.0	4.0	11.0	1.9	0.0	4.0	11.0	1.9	0.0	5.0	11.0	1.93	0.0	4.0	11.0	1.9	0.0	4.0
629	4.0	11.0	1.9	0.0	4.0	11.0	1.9	0.0	4.0	11.0	1.9	0.0	4.0	11.0	1.9	0.0	4.0	11.0	1.9	0.0	4.0	11.0	1.9	0.0	5.0	11.0	1.93	0.0	4.0	11.0	1.9	0.0	4.0	11.0	1.9	0.0	5.0	11.0	1.93	0.0	4.0	11.0	1.9	0.0	4.0	11.0	1.9	0.0	4.0
630	4.0	11.0	1.9	0.0	5.0	11.0	1.93	0.0	4.0	11.0	1.9	0.0	5.0	11.0	1.93	0.0	4.0	11.0	1.9	0.0	4.0	11.0	1.9	0.0	5.0	11.0	1.93	0.0	4.0	11.0	1.9	0.0	4.0	11.0	1.9	0.0	5.0	11.0	1.93	0.0	4.0	11.0	1.9	0.0	4.0	11.0	1.9	0.0	4.0
631	4.0	11.0	1.9	0.0	5.0	11.0	1.93	0.0	4.0	11.0	1.9	0.0	4.0	11.0	1.9	0.0	4.0	11.0	1.9	0.0	4.0	11.0	1.9	0.0	5.0	11.0	1.93	0.0	4.0	11.0	1.9	0.0	4.0	11.0	1.9	0.0	4.0	11.0	1.9	0.0	4.0	11.0	1.9	0.0	5.0	11.0	1.93	0.0	4.0
632	4.0	11.0	1.9	0.0	4.0	11.0	1.9	0.0	4.0	11.0	1.9	0.0	4.0	11.0	1.9	0.0	4.0	11.0	1.9	0.0	5.0	11.0	1.93	0.0	4.0	11.0	1.9	0.0	5.0	11.0	1.93	0.0	4.0	11.0	1.9	0.0	5.0	11.0	1.93	0.0	5.0	11.0	1.93	0.0	4.0	11.0	1.9	0.0	5.0
633	4.0	11.0	1.9	0.0	4.0	11.0	1.9	0.0	4.0	11.0	1.9	0.0	4.0	11.0	1.9	0.0	5.0	11.0	1.93	0.0	4.0	11.0	1.9	0.0	4.0	11.0	1.9	0.0	4.0	11.0	1.9	0.0	5.0	11.0	1.93	0.0	4.0	11.0	1.9	0.0	5.0	11.0	1.93	0.0	4.0	11.0	1.9	0.0	5.0
634	4.0	11.0	1.9	0.0	5.0	11.0	1.93	0.0	5.0	11.0	1.93	0.0	4.0	11.0	1.9	0.0	5.0	11.0	1.93	0.0	4.0	11.0	1.9	0.0	4.0	11.0	1.9	0.0	4.0	11.0	1.9	0.0	4.0	11.0	1.9	0.0	4.0	11.0	1.9	0.0	5.0	11.0	1.93	0.0	4.0	11.0	1.9	0.0	4.0
635	4.0	11.0	1.9	0.0	4.0	11.0	1.9	0.0	4.0	11.0	1.9	0.0	4.0	11.0	1.9	0.0	5.0	11.0	1.93	0.0	4.0	11.0	1.9	0.0	5.0	11.0	1.93	0.0	5.0	11.0	1.93	0.0	4.0	11.0	1.9	0.0	4.0	11.0	1.9	0.0	4.0	11.0	1.9	0.0	4.0	11.0	1.9	0.0	5.0
636	4.0	11.0	1.9	0.0	5.0	11.0	1.93	0.0	5.0	11.0	1.93	0.0	4.0	11.0	1.9	0.0	4.0	11.0	1.9	0.0	4.0	11.0	1.9	0.0	4.0	11.0	1.9	0.0	5.0	11.0	1.93	0.0	4.0	11.0	1.9	0.0	4.0	11.0	1.9	0.0	4.0	11.0	1.9	0.0	4.0	11.0	1.9	0.0	4.0
637	4.0	11.0	1.9	0.0	5.0	11.0	1.93	0.0	4.0	11.0	1.9	0.0	4.0	11.0	1.9	0.0	4.0	11.0	1.9	0.0	5.0	11.0	1.93	0.0	5.0	11.0	1.93	0.0	4.0	11.0	1.9	0.0	4.0	11.0	1.9	0.0	4.0	11.0	1.9	0.0	4.0	11.0	1.9	0.0	4.0	11.0	1.9	0.0	5.0
638	4.0	11.0	1.9	0.0	4.0	11.0	1.9	0.0	4.0	11.0	1.9	0.0	5.0	11.0	1.93	0.0	4.0	11.0	1.9	0.0	4.0	11.0	1.9	0.0	4.0	11.0	1.9	0.0	4.0	11.0	1.9	0.0	5.0	11.0	1.93	0.0	4.0	11.0	1.9	0.0	4.0	11.0	1.9	0.0	5.0	11.0	1.93	0.0	4.0
639	4.0	11.0	1.9	0.0	4.0	11.0	1.9	0.0	4.0	11.0	1.9	0.0	5.0	11.0	1.93	0.0	5.0	11.0	1.93	0.0	4.0	11.0	1.9	0.0	5.0	11.0	1.93	0.0	4.0	11.0	1.9	0.0	4.0	11.0	1.9	0.0	4.0	11.0	1.9	0.0	4.0	11.0	1.9	0.0	4.0	11.0	1.9	0.0	4.0
640	4.0	11.0	1.9	0.0	4.0	11.0	1.9	0.0	4.0	11.0	1.9	0.0	4.0	11.0	1.9	0.0	4.0	11.0	1.9	0.0	5.0	11.0	1.93	0.0	5.0	11.0	1.93	0.0	4.0	11.0	1.9	0.0	4.0	11.0	1.9	0.0	5.0	11.0	1.93	0.0	4.0	11.0	1.9	0.0	4.0	11.0	1.9	0.0	4.0
641	5.0	11.0	1.93	0.0	4.0	11.0	1.9	0.0	4.0	11.0	1.9	0.0	5.0	11.0	1.93	0.0	4.0	11.0	1.9	0.0	4.0	11.0	1.9	0.0	4.0	11.0	1.9	0.0	4.0	11.0	1.9	0.0	4.0	11.0	1.9	0.0	4.0	11.0	1.9	0.0	4.0	11.0	1.9	0.0	4.0	11.0	1.9	0.0	4.0
642	4.0	11.0	1.9	0.0	4.0	11.0	1.9	0.0	4.0	11.0	1.9	0.0	4.0	11.0	1.9	0.0	4.0	11.0	1.9	0.0	5.0	11.0	1.93	0.0	4.0	11.0	1.9	0.0	4.0	11.0	1.9	0.0	4.0	11.0	1.9	0.0	4.0	11.0	1.9	0.0	5.0	11.0	1.93	0.0	4.0	11.0	1.9	0.0	4.0
643	4.0	11.0	1.9	0.0	4.0	11.0	1.9	0.0	4.0	11.0	1.9	0.0	4.0	11.0	1.9	0.0	4.0	11.0	1.9	0.0	4.0	11.0	1.9	0.0	5.0	11.0	1.93	0.0	4.0	11.0	1.9	0.0	4.0	11.0	1.9	0.0	4.0	11.0	1.9	0.0	5.0	11.0	1.93	0.0	4.0	11.0	1.9	0.0	4.0
644	4.0	11.0	1.9	0.0	4.0	11.0	1.9	0.0	5.0	11.0	1.93	0.0	4.0	11.0	1.9	0.0	5.0	11.0	1.93	0.0	4.0	11.0	1.9	0.0	5.0	11.0	1.93	0.0	4.0	11.0	1.9	0.0	5.0	11.0	1.93	0.0	4.0	11.0	1.9	0.0	5.0	11.0	1.93	0.0	4.0	11.0	1.9	0.0	4.0
645	4.0	11.0	1.9	0.0	4.0	11.0	1.9	0.0	4.0	11.0	1.9	0.0	4.0	11.0	1.9	0.0	4.0	11.0	1.9	0.0	4.0	11.0	1.9	0.0	4.0	11.0	1.9	0.0	5.0	11.0	1.93	0.0	4.0	11.0	1.9	0.0	4.0	11.0	1.9	0.0	5.0	11.0	1.93	0.0	4.0	11.0	1.9	0.0	4.0
646	5.0	11.0	1.93	0.0	4.0	11.0	1.9	0.0	5.0	11.0	1.93	0.0	4.0	11.0	1.9	0.0	4.0	11.0	1.9	0.0	4.0	11.0	1.9	0.0	4.0	11.0	1.9	0.0	4.0	11.0	1.9	0.0	4.0	11.0	1.9	0.0	4.0	11.0	1.9	0.0	4.0	11.0	1.9	0.0	4.0	11.0	1.9	0.0	5.0
647	5.0	11.0	1.93	0.0	5.0	11.0	1.93	0.0	4.0	11.0	1.9	0.0	4.0	11.0	1.9	0.0	4.0	11.0	1.9	0.0	4.0	11.0	1.9	0.0	4.0	11.0	1.9	0.0	4.0	11.0	1.9	0.0	4.0	11.0	1.9	0.0	4.0	11.0	1.9	0.0	5.0	11.0	1.93	0.0	4.0	11.0	1.9	0.0	4.0
648	4.0	11.0	1.9	0.0	4.0	11.0	1.9	0.0	4.0	11.0	1.9	0.0	4.0	11.0	1.9	0.0	5.0	11.0	1.93	0.0	4.0	11.0	1.9	0.0	5.0	11.0	1.93	0.0	5.0	11.0	1.93	0.0	4.0	11.0	1.9	0.0	4.0	11.0	1.9	0.0	4.0	11.0	1.9	0.0	4.0	11.0	1.9	0.0	4.0
649	4.0	11.0	1.9	0.0	5.0	11.0	1.93	0.0	4.0	11.0	1.9	0.0	4.0	11.0	1.9	0.0	4.0	11.0	1.9	0.0	5.0	11.0	1.93	0.0	4.0	11.0	1.9	0.0	4.0	11.0	1.9	0.0	4.0	11.0	1.9	0.0	4.0	11.0	1.9	0.0	4.0	11.0	1.9	0.0	5.0	11.0	1.93	0.0	4.0
650	5.0	11.0	1.93	0.0	4.0	11.0	1.9	0.0	4.0	11.0	1.9	0.0	4.0	11.0	1.9	0.0	4.0	11.0	1.9	0.0	4.0	11.0	1.9	0.0	4.0	11.0	1.9	0.0	4.0	11.0	1.9	0.0	4.0	11.0	1.9	0.0	4.0	11.0	1.9	0.0	4.0	11.0	1.9	0.0	5.0	11.0	1.93	0.0	5.0
651	5.0	11.0	1.93	0.0	5.0	11.0	1.93	0.0	4.0	11.0	1.9	0.0	5.0	11.0	1.93	0.0	4.0	11.0	1.9	0.0	4.0	11.0	1.9	0.0	4.0	11.0	1.9	0.0	4.0	11.0	1.9	0.0	4.0	11.0	1.9	0.0	4.0	11.0	1.9	0.0	4.0	11.0	1.9	0.0	4.0	11.0	1.9	0.0	4.0
652	5.0	11.0	1.93	0.0	5.0	11.0	1.93	0.0	4.0	11.0	1.9	0.0	5.0	11.0	1.93	0.0	4.0	11.0	1.9	0.0	5.0	11.0	1.93	0.0	4.0	11.0	1.9	0.0	4.0	11.0	1.9	0.0	5.0	11.0	1.93	0.0	4.0	11.0	1.9	0.0	4.0	11.0	1.9	0.0	4.0	11.0	1.9	0.0	5.0
653	4.0	11.0	1.9	0.0	4.0	11.0	1.9	0.0	4.0	11.0	1.9	0.0	4.0	11.0	1.9	0.0	5.0	11.0	1.93	0.0	5.0	11.0	1.93	0.0	4.0	11.0	1.9	0.0	4.0	11.0	1.9	0.0	4.0	11.0	1.9	0.0	4.0	11.0	1.9	0.0	5.0	11.0	1.93	0.0	4.0	11.0	1.9	0.0	4.0
654	4.0	11.0	1.9	0.0	4.0	11.0	1.9	0.0	4.0	11.0	1.9	0.0	4.0	11.0	1.9	0.0	4.0	11.0	1.9	0.0	4.0	11.0	1.9	0.0	4.0	11.0	1.9	0.0	4.0	11.0	1.9	0.0	5.0	11.0	1.93	0.0	4.0	11.0	1.9	0.0	4.0	11.0	1.9	0.0	4.0	11.0	1.9	0.0	5.0
655	5.0	11.0	1.93	0.0	5.0	11.0	1.93	0.0	4.0	11.0	1.9	0.0	5.0	11.0	1.93	0.0	4.0	11.0	1.9	0.0	4.0	11.0	1.9	0.0	4.0	11.0	1.9	0.0	4.0	11.0	1.9	0.0	5.0	11.0	1.93	0.0	4.0	11.0	1.9	0.0	4.0	11.0	1.9	0.0	4.0	11.0	1.9	0.0	4.0
656	5.0	11.0	1.93	0.0	4.0	11.0	1.9	0.0	4.0	11.0	1.9	0.0	4.0	11.0	1.9	0.0	4.0	11.0	1.9	0.0	4.0	11.0	1.9	0.0	4.0	11.0	1.9	0.0	4.0	11.0	1.9	0.0	4.0	11.0	1.9	0.0	5.0	11.0	1.93	0.0	4.0	11.0	1.9	0.0	4.0	11.0	1.9	0.0	5.0
657	4.0	11.0	1.9	0.0	5.0	11.0	1.93	0.0	4.0	11.0	1.9	0.0	5.0	11.0	1.93	0.0	4.0	11.0	1.9	0.0	4.0	11.0	1.9	0.0	4.0	11.0	1.9	0.0	4.0	11.0	1.9	0.0	4.0	11.0	1.9	0.0	4.0	11.0	1.9	0.0	4.0	11.0	1.9	0.0	5.0	11.0	1.93	0.0	4.0
658	4.0	11.0	1.9	0.0	4.0	11.0	1.9	0.0	4.0	11.0	1.9	0.0	4.0	11.0	1.9	0.0	4.0	11.0	1.9	0.0	4.0	11.0	1.9	0.0	4.0	11.0	1.9	0.0	5.0	11.0	1.93	0.0	4.0	11.0	1.9	0.0	5.0	11.0	1.93	0.0	4.0	11.0	1.9	0.0	4.0	11.0	1.9	0.0	4.0
659	4.0	11.0	1.9	0.0	4.0	11.0	1.9	0.0	4.0	11.0	1.9	0.0	5.0	11.0	1.93	0.0	5.0	11.0	1.93	0.0	4.0	11.0	1.9	0.0	4.0	11.0	1.9	0.0	4.0	11.0	1.9	0.0	5.0	11.0	1.93	0.0	4.0	11.0	1.9	0.0	4.0	11.0	1.9	0.0	4.0	11.0	1.9	0.0	4.0
660	4.0	11.0	1.9	0.0	4.0	11.0	1.9	0.0	4.0	11.0	1.9	0.0	5.0	11.0	1.93	0.0	4.0	11.0	1.9	0.0	4.0	11.0	1.9	0.0	4.0	11.0	1.9	0.0	5.0	11.0	1.93	0.0	4.0	11.0	1.9	0.0	4.0	11.0	1.9	0.0	4.0	11.0	1.9	0.0	4.0	11.0	1.9	0.0	5.0
661	4.0	11.0	1.9	0.0	5.0	11.0	1.93	0.0	5.0	11.0	1.93	0.0	4.0	11.0	1.9	0.0	5.0	11.0	1.93	0.0	4.0	11.0	1.9	0.0	4.0	11.0	1.9	0.0	5.0	11.0	1.93	0.0	4.0	11.0	1.9	0.0	4.0	11.0	1.9	0.0	5.0	11.0	1.93	0.0	4.0	11.0	1.9	0.0	4.0
662	4.0	11.0	1.9	0.0	4.0	11.0	1.9	0.0	4.0	11.0	1.9	0.0	4.0	11.0	1.9	0.0	5.0	11.0	1.93	0.0	5.0	11.0	1.93	0.0	5.0	11.0	1.93	0.0	4.0	11.0	1.9	0.0	4.0	11.0	1.9	0.0	5.0	11.0	1.93	0.0	5.0	11.0	1.93	0.0	4.0	11.0	1.9	0.0	4.0
663	4.0	11.0	1.9	0.0	4.0	11.0	1.9	0.0	4.0	11.0	1.9	0.0	5.0	11.0	1.93	0.0	4.0	11.0	1.9	0.0	5.0	11.0	1.93	0.0	4.0	11.0	1.9	0.0	5.0	11.0	1.93	0.0	4.0	11.0	1.9	0.0	5.0	11.0	1.93	0.0	4.0	11.0	1.9	0.0	4.0	11.0	1.9	0.0	4.0
664	4.0	11.0	1.9	0.0	5.0	11.0	1.93	0.0	4.0	11.0	1.9	0.0	4.0	11.0	1.9	0.0	4.0	11.0	1.9	0.0	5.0	11.0	1.93	0.0	4.0	11.0	1.9	0.0	4.0	11.0	1.9	0.0	4.0	11.0	1.9	0.0	4.0	11.0	1.9	0.0	5.0	11.0	1.93	0.0	4.0	11.0	1.9	0.0	5.0
665	5.0	11.0	1.93	0.0	4.0	11.0	1.9	0.0	4.0	11.0	1.9	0.0	4.0	11.0	1.9	0.0	4.0	11.0	1.9	0.0	4.0	11.0	1.9	0.0	5.0	11.0	1.93	0.0	4.0	11.0	1.9	0.0	4.0	11.0	1.9	0.0	4.0	11.0	1.9	0.0	4.0	11.0	1.9	0.0	5.0	11.0	1.93	0.0	4.0
666	5.0	11.0	1.93	0.0	4.0	11.0	1.9	0.0	4.0	11.0	1.9	0.0	5.0	11.0	1.93	0.0	4.0	11.0	1.9	0.0	4.0	11.0	1.9	0.0	4.0	11.0	1.9	0.0	4.0	11.0	1.9	0.0	5.0	11.0	1.93	0.0	4.0	11.0	1.9	0.0	4.0	11.0	1.9	0.0	4.0	11.0	1.9	0.0	4.0
667	4.0	11.0	1.9	0.0	4.0	11.0	1.9	0.0	4.0	11.0	1.9	0.0	4.0	11.0	1.9	0.0	4.0	11.0	1.9	0.0	5.0	11.0	1.93	0.0	4.0	11.0	1.9	0.0	5.0	11.0	1.93	0.0	4.0	11.0	1.9	0.0	4.0	11.0	1.9	0.0	4.0	11.0	1.9	0.0	4.0	11.0	1.9	0.0	4.0
668	5.0	11.0	1.93	0.0	4.0	11.0	1.9	0.0	4.0	11.0	1.9	0.0	4.0	11.0	1.9	0.0	4.0	11.0	1.9	0.0	4.0	11.0	1.9	0.0	4.0	11.0	1.9	0.0	4.0	11.0	1.9	0.0	4.0	11.0	1.9	0.0	4.0	11.0	1.9	0.0	4.0	11.0	1.9	0.0	5.0	11.0	1.93	0.0	4.0
669	4.0	11.0	1.9	0.0	4.0	11.0	1.9	0.0	4.0	11.0	1.9	0.0	4.0	11.0	1.9	0.0	5.0	11.0	1.93	0.0	4.0	11.0	1.9	0.0	4.0	11.0	1.9	0.0	4.0	11.0	1.9	0.0	4.0	11.0	1.9	0.0	5.0	11.0	1.93	0.0	4.0	11.0	1.9	0.0	4.0	11.0	1.9	0.0	4.0
670	4.0	11.0	1.9	0.0	5.0	11.0	1.93	0.0	5.0	11.0	1.93	0.0	4.0	11.0	1.9	0.0	4.0	11.0	1.9	0.0	4.0	11.0	1.9	0.0	5.0	11.0	1.93	0.0	4.0	11.0	1.9	0.0	4.0	11.0	1.9	0.0	5.0	11.0	1.93	0.0	4.0	11.0	1.9	0.0	4.0	11.0	1.9	0.0	4.0
671	4.0	11.0	1.9	0.0	4.0	11.0	1.9	0.0	4.0	11.0	1.9	0.0	4.0	11.0	1.9	0.0	5.0	11.0	1.93	0.0	4.0	11.0	1.9	0.0	5.0	11.0	1.93	0.0	5.0	11.0	1.93	0.0	4.0	11.0	1.9	0.0	5.0	11.0	1.93	0.0	4.0	11.0	1.9	0.0	4.0	11.0	1.9	0.0	4.0
672	4.0	11.0	1.9	0.0	4.0	11.0	1.9	0.0	4.0	11.0	1.9	0.0	4.0	11.0	1.9	0.0	4.0	11.0	1.9	0.0	5.0	11.0	1.93	0.0	5.0	11.0	1.93	0.0	4.0	11.0	1.9	0.0	5.0	11.0	1.93	0.0	4.0	11.0	1.9	0.0	4.0	11.0	1.9	0.0	5.0	11.0	1.93	0.0	4.0
673	5.0	11.0	1.93	0.0	4.0	11.0	1.9	0.0	4.0	11.0	1.9	0.0	4.0	11.0	1.9	0.0	4.0	11.0	1.9	0.0	4.0	11.0	1.9	0.0	5.0	11.0	1.93	0.0	4.0	11.0	1.9	0.0	4.0	11.0	1.9	0.0	4.0	11.0	1.9	0.0	5.0	11.0	1.93	0.0	4.0	11.0	1.9	0.0	5.0
674	4.0	11.0	1.9	0.0	4.0	11.0	1.9	0.0	4.0	11.0	1.9	0.0	4.0	11.0	1.9	0.0	4.0	11.0	1.9	0.0	4.0	11.0	1.9	0.0	4.0	11.0	1.9	0.0	5.0	11.0	1.93	0.0	4.0	11.0	1.9	0.0	5.0	11.0	1.93	0.0	4.0	11.0	1.9	0.0	4.0	11.0	1.9	0.0	5.0
675	4.0	11.0	1.9	0.0	4.0	11.0	1.9	0.0	5.0	11.0	1.93	0.0	4.0	11.0	1.9	0.0	4.0	11.0	1.9	0.0	5.0	11.0	1.93	0.0	4.0	11.0	1.9	0.0	4.0	11.0	1.9	0.0	4.0	11.0	1.9	0.0	4.0	11.0	1.9	0.0	4.0	11.0	1.9	0.0	4.0	11.0	1.9	0.0	4.0
676	4.0	11.0	1.9	0.0	4.0	11.0	1.9	0.0	4.0	11.0	1.9	0.0	4.0	11.0	1.9	0.0	4.0	11.0	1.9	0.0	5.0	11.0	1.93	0.0	4.0	11.0	1.9	0.0	4.0	11.0	1.9	0.0	4.0	11.0	1.9	0.0	4.0	11.0	1.9	0.0	4.0	11.0	1.9	0.0	5.0	11.0	1.93	0.0	4.0
677	5.0	11.0	1.93	0.0	5.0	11.0	1.93	0.0	4.0	11.0	1.9	0.0	4.0	11.0	1.9	0.0	5.0	11.0	1.93	0.0	4.0	11.0	1.9	0.0	4.0	11.0	1.9	0.0	5.0	11.0	1.93	0.0	4.0	11.0	1.9	0.0	4.0	11.0	1.9	0.0	5.0	11.0	1.93	0.0	4.0	11.0	1.9	0.0	4.0
678	5.0	11.0	1.93	0.0	4.0	11.0	1.9	0.0	4.0	11.0	1.9	0.0	5.0	11.0	1.93	0.0	4.0	11.0	1.9	0.0	4.0	11.0	1.9	0.0	4.0	11.0	1.9	0.0	4.0	11.0	1.9	0.0	4.0	11.0	1.9	0.0	4.0	11.0	1.9	0.0	4.0	11.0	1.9	0.0	5.0	11.0	1.93	0.0	4.0
679	5.0	11.0	1.93	0.0	5.0	11.0	1.93	0.0	5.0	11.0	1.93	0.0	5.0	11.0	1.93	0.0	4.0	11.0	1.9	0.0	5.0	11.0	1.93	0.0	4.0	11.0	1.9	0.0	4.0	11.0	1.9	0.0	4.0	11.0	1.9	0.0	4.0	11.0	1.9	0.0	5.0	11.0	1.93	0.0	4.0	11.0	1.9	0.0	4.0
680	4.0	11.0	1.9	0.0	4.0	11.0	1.9	0.0	4.0	11.0	1.9	0.0	5.0	11.0	1.93	0.0	5.0	11.0	1.93	0.0	4.0	11.0	1.9	0.0	4.0	11.0	1.9	0.0	5.0	11.0	1.93	0.0	4.0	11.0	1.9	0.0	4.0	11.0	1.9	0.0	4.0	11.0	1.9	0.0	4.0	11.0	1.9	0.0	4.0
681	4.0	11.0	1.9	0.0	4.0	11.0	1.9	0.0	5.0	11.0	1.93	0.0	4.0	11.0	1.9	0.0	4.0	11.0	1.9	0.0	5.0	11.0	1.93	0.0	4.0	11.0	1.9	0.0	4.0	11.0	1.9	0.0	5.0	11.0	1.93	0.0	4.0	11.0	1.9	0.0	4.0	11.0	1.9	0.0	4.0	11.0	1.9	0.0	4.0
682	4.0	11.0	1.9	0.0	4.0	11.0	1.9	0.0	4.0	11.0	1.9	0.0	4.0	11.0	1.9	0.0	4.0	11.0	1.9	0.0	5.0	11.0	1.93	0.0	5.0	11.0	1.93	0.0	4.0	11.0	1.9	0.0	4.0	11.0	1.9	0.0	4.0	11.0	1.9	0.0	4.0	11.0	1.9	0.0	4.0	11.0	1.9	0.0	4.0
683	4.0	11.0	1.9	0.0	4.0	11.0	1.9	0.0	5.0	11.0	1.93	0.0	4.0	11.0	1.9	0.0	4.0	11.0	1.9	0.0	4.0	11.0	1.9	0.0	5.0	11.0	1.93	0.0	4.0	11.0	1.9	0.0	5.0	11.0	1.93	0.0	5.0	11.0	1.93	0.0	5.0	11.0	1.93	0.0	4.0	11.0	1.9	0.0	4.0
684	4.0	11.0	1.9	0.0	5.0	11.0	1.93	0.0	5.0	11.0	1.93	0.0	5.0	11.0	1.93	0.0	5.0	11.0	1.93	0.0	4.0	11.0	1.9	0.0	4.0	11.0	1.9	0.0	4.0	11.0	1.9	0.0	4.0	11.0	1.9	0.0	5.0	11.0	1.93	0.0	4.0	11.0	1.9	0.0	4.0	11.0	1.9	0.0	4.0
685	4.0	11.0	1.9	0.0	4.0	11.0	1.9	0.0	4.0	11.0	1.9	0.0	5.0	11.0	1.93	0.0	4.0	11.0	1.9	0.0	5.0	11.0	1.93	0.0	5.0	11.0	1.93	0.0	5.0	11.0	1.93	0.0	4.0	11.0	1.9	0.0	5.0	11.0	1.93	0.0	4.0	11.0	1.9	0.0	5.0	11.0	1.93	0.0	4.0
686	4.0	11.0	1.9	0.0	5.0	11.0	1.93	0.0	4.0	11.0	1.9	0.0	4.0	11.0	1.9	0.0	5.0	11.0	1.93	0.0	4.0	11.0	1.9	0.0	4.0	11.0	1.9	0.0	4.0	11.0	1.9	0.0	4.0	11.0	1.9	0.0	4.0	11.0	1.9	0.0	4.0	11.0	1.9	0.0	5.0	11.0	1.93	0.0	5.0
687	4.0	11.0	1.9	0.0	4.0	11.0	1.9	0.0	4.0	11.0	1.9	0.0	4.0	11.0	1.9	0.0	5.0	11.0	1.93	0.0	4.0	11.0	1.9	0.0	4.0	11.0	1.9	0.0	4.0	11.0	1.9	0.0	4.0	11.0	1.9	0.0	5.0	11.0	1.93	0.0	5.0	11.0	1.93	0.0	4.0	11.0	1.9	0.0	4.0
688	4.0	11.0	1.9	0.0	4.0	11.0	1.9	0.0	5.0	11.0	1.93	0.0	4.0	11.0	1.9	0.0	5.0	11.0	1.93	0.0	4.0	11.0	1.9	0.0	5.0	11.0	1.93	0.0	4.0	11.0	1.9	0.0	4.0	11.0	1.9	0.0	5.0	11.0	1.93	0.0	4.0	11.0	1.9	0.0	4.0	11.0	1.9	0.0	4.0
689	4.0	11.0	1.9	0.0	5.0	11.0	1.93	0.0	4.0	11.0	1.9	0.0	4.0	11.0	1.9	0.0	4.0	11.0	1.9	0.0	4.0	11.0	1.9	0.0	4.0	11.0	1.9	0.0	4.0	11.0	1.9	0.0	4.0	11.0	1.9	0.0	4.0	11.0	1.9	0.0	5.0	11.0	1.93	0.0	4.0	11.0	1.9	0.0	4.0
690	4.0	11.0	1.9	0.0	5.0	11.0	1.93	0.0	4.0	11.0	1.9	0.0	4.0	11.0	1.9	0.0	4.0	11.0	1.9	0.0	4.0	11.0	1.9	0.0	4.0	11.0	1.9	0.0	4.0	11.0	1.9	0.0	5.0	11.0	1.93	0.0	4.0	11.0	1.9	0.0	4.0	11.0	1.9	0.0	5.0	11.0	1.93	0.0	4.0
691	4.0	11.0	1.9	0.0	4.0	11.0	1.9	0.0	4.0	11.0	1.9	0.0	4.0	11.0	1.9	0.0	4.0	11.0	1.9	0.0	5.0	11.0	1.93	0.0	5.0	11.0	1.93	0.0	4.0	11.0	1.9	0.0	4.0	11.0	1.9	0.0	5.0	11.0	1.93	0.0	4.0	11.0	1.9	0.0	4.0	11.0	1.9	0.0	5.0
692	4.0	11.0	1.9	0.0	4.0	11.0	1.9	0.0	4.0	11.0	1.9	0.0	4.0	11.0	1.9	0.0	5.0	11.0	1.93	0.0	4.0	11.0	1.9	0.0	4.0	11.0	1.9	0.0	4.0	11.0	1.9	0.0	4.0	11.0	1.9	0.0	4.0	11.0	1.9	0.0	5.0	11.0	1.93	0.0	4.0	11.0	1.9	0.0	5.0
693	4.0	11.0	1.9	0.0	4.0	11.0	1.9	0.0	5.0	11.0	1.93	0.0	4.0	11.0	1.9	0.0	4.0	11.0	1.9	0.0	4.0	11.0	1.9	0.0	4.0	11.0	1.9	0.0	5.0	11.0	1.93	0.0	5.0	11.0	1.93	0.0	5.0	11.0	1.93	0.0	4.0	11.0	1.9	0.0	4.0	11.0	1.9	0.0	4.0
694	4.0	11.0	1.9	0.0	4.0	11.0	1.9	0.0	5.0	11.0	1.93	0.0	4.0	11.0	1.9	0.0	4.0	11.0	1.9	0.0	4.0	11.0	1.9	0.0	4.0	11.0	1.9	0.0	5.0	11.0	1.93	0.0	4.0	11.0	1.9	0.0	4.0	11.0	1.9	0.0	5.0	11.0	1.93	0.0	4.0	11.0	1.9	0.0	5.0
695	4.0	11.0	1.9	0.0	5.0	11.0	1.93	0.0	5.0	11.0	1.93	0.0	4.0	11.0	1.9	0.0	4.0	11.0	1.9	0.0	4.0	11.0	1.9	0.0	5.0	11.0	1.93	0.0	4.0	11.0	1.9	0.0	4.0	11.0	1.9	0.0	4.0	11.0	1.9	0.0	4.0	11.0	1.9	0.0	4.0	11.0	1.9	0.0	5.0
696	4.0	11.0	1.9	0.0	6.0	8.0	2.2	4.0	4.0	11.0	1.9	0.0	4.0	11.0	1.9	0.0	6.0	8.0	2.2	4.0	4.0	11.0	1.9	0.0	4.0	11.0	1.9	0.0	4.0	11.0	1.9	0.0	4.0	11.0	1.9	0.0	6.0	8.0	2.2	4.0	4.0	11.0	1.9	0.0	4.0	11.0	1.9	0.0	4.0
697	6.0	8.0	2.2	4.0	4.0	11.0	1.9	0.0	4.0	11.0	1.9	0.0	4.0	11.0	1.9	0.0	6.0	8.0	2.2	4.0	4.0	11.0	1.9	0.0	4.0	11.0	1.9	0.0	6.0	8.0	2.2	4.0	4.0	11.0	1.9	0.0	6.0	8.0	2.2	4.0	6.0	8.0	2.2	4.0	4.0	11.0	1.9	0.0	4.0
698	4.0	11.0	1.9	0.0	6.0	8.0	2.2	4.0	6.0	8.0	2.2	4.0	4.0	11.0	1.9	0.0	4.0	11.0	1.9	0.0	6.0	8.0	2.2	4.0	4.0	11.0	1.9	0.0	4.0	11.0	1.9	0.0	4.0	11.0	1.9	0.0	4.0	11.0	1.9	0.0	4.0	11.0	1.9	0.0	4.0	11.0	1.9	0.0	6.0
699	6.0	8.0	2.2	4.0	4.0	11.0	1.9	0.0	4.0	11.0	1.9	0.0	4.0	11.0	1.9	0.0	6.0	8.0	2.2	4.0	4.0	11.0	1.9	0.0	4.0	11.0	1.9	0.0	6.0	8.0	2.2	4.0	4.0	11.0	1.9	0.0	6.0	8.0	2.2	4.0	4.0	11.0	1.9	0.0	4.0	11.0	1.9	0.0	4.0
700	4.0	11.0	1.9	0.0	6.0	8.0	2.2	4.0	4.0	11.0	1.9	0.0	4.0	11.0	1.9	0.0	4.0	11.0	1.9	0.0	6.0	8.0	2.2	4.0	4.0	11.0	1.9	0.0	4.0	11.0	1.9	0.0	4.0	11.0	1.9	0.0	4.0	11.0	1.9	0.0	6.0	8.0	2.2	4.0	6.0	8.0	2.2	4.0	4.0
701	4.0	11.0	1.9	0.0	4.0	11.0	1.9	0.0	4.0	11.0	1.9	0.0	6.0	8.0	2.2	4.0	4.0	11.0	1.9	0.0	4.0	11.0	1.9	0.0	4.0	11.0	1.9	0.0	4.0	11.0	1.9	0.0	4.0	11.0	1.9	0.0	4.0	11.0	1.9	0.0	4.0	11.0	1.9	0.0	4.0	11.0	1.9	0.0	4.0
702	4.0	11.0	1.9	0.0	6.0	8.0	2.2	4.0	6.0	8.0	2.2	4.0	4.0	11.0	1.9	0.0	4.0	11.0	1.9	0.0	4.0	11.0	1.9	0.0	6.0	8.0	2.2	4.0	4.0	11.0	1.9	0.0	4.0	11.0	1.9	0.0	4.0	11.0	1.9	0.0	4.0	11.0	1.9	0.0	4.0	11.0	1.9	0.0	4.0
703	4.0	11.0	1.9	0.0	4.0	11.0	1.9	0.0	4.0	11.0	1.9	0.0	4.0	11.0	1.9	0.0	4.0	11.0	1.9	0.0	4.0	11.0	1.9	0.0	4.0	11.0	1.9	0.0	4.0	11.0	1.9	0.0	4.0	11.0	1.9	0.0	4.0	11.0	1.9	0.0	6.0	8.0	2.2	4.0	4.0	11.0	1.9	0.0	6.0
704	4.0	11.0	1.9	0.0	4.0	11.0	1.9	0.0	4.0	11.0	1.9	0.0	4.0	11.0	1.9	0.0	6.0	8.0	2.2	4.0	4.0	11.0	1.9	0.0	4.0	11.0	1.9	0.0	6.0	8.0	2.2	4.0	6.0	8.0	2.2	4.0	4.0	11.0	1.9	0.0	6.0	8.0	2.2	4.0	4.0	11.0	1.9	0.0	4.0
705	4.0	11.0	1.9	0.0	6.0	8.0	2.2	4.0	4.0	11.0	1.9	0.0	4.0	11.0	1.9	0.0	4.0	11.0	1.9	0.0	4.0	11.0	1.9	0.0	4.0	11.0	1.9	0.0	6.0	8.0	2.2	4.0	4.0	11.0	1.9	0.0	4.0	11.0	1.9	0.0	6.0	8.0	2.2	4.0	4.0	11.0	1.9	0.0	4.0
706	4.0	11.0	1.9	0.0	4.0	11.0	1.9	0.0	4.0	11.0	1.9	0.0	4.0	11.0	1.9	0.0	4.0	11.0	1.9	0.0	4.0	11.0	1.9	0.0	6.0	8.0	2.2	4.0	4.0	11.0	1.9	0.0	4.0	11.0	1.9	0.0	4.0	11.0	1.9	0.0	4.0	11.0	1.9	0.0	4.0	11.0	1.9	0.0	4.0
707	4.0	11.0	1.9	0.0	4.0	11.0	1.9	0.0	4.0	11.0	1.9	0.0	4.0	11.0	1.9	0.0	4.0	11.0	1.9	0.0	4.0	11.0	1.9	0.0	4.0	11.0	1.9	0.0	4.0	11.0	1.9	0.0	4.0	11.0	1.9	0.0	6.0	8.0	2.2	4.0	4.0	11.0	1.9	0.0	4.0	11.0	1.9	0.0	6.0
708	4.0	11.0	1.9	0.0	4.0	11.0	1.9	0.0	6.0	8.0	2.2	4.0	4.0	11.0	1.9	0.0	4.0	11.0	1.9	0.0	4.0	11.0	1.9	0.0	6.0	8.0	2.2	4.0	6.0	8.0	2.2	4.0	4.0	11.0	1.9	0.0	6.0	8.0	2.2	4.0	4.0	11.0	1.9	0.0	4.0	11.0	1.9	0.0	6.0
709	4.0	11.0	1.9	0.0	6.0	8.0	2.2	4.0	4.0	11.0	1.9	0.0	4.0	11.0	1.9	0.0	6.0	8.0	2.2	4.0	4.0	11.0	1.9	0.0	4.0	11.0	1.9	0.0	4.0	11.0	1.9	0.0	4.0	11.0	1.9	0.0	4.0	11.0	1.9	0.0	4.0	11.0	1.9	0.0	4.0	11.0	1.9	0.0	4.0
710	4.0	11.0	1.9	0.0	4.0	11.0	1.9	0.0	6.0	8.0	2.2	4.0	4.0	11.0	1.9	0.0	4.0	11.0	1.9	0.0	4.0	11.0	1.9	0.0	4.0	11.0	1.9	0.0	4.0	11.0	1.9	0.0	4.0	11.0	1.9	0.0	4.0	11.0	1.9	0.0	6.0	8.0	2.2	4.0	6.0	8.0	2.2	4.0	4.0
711	4.0	11.0	1.9	0.0	6.0	8.0	2.2	4.0	4.0	11.0	1.9	0.0	4.0	11.0	1.9	0.0	4.0	11.0	1.9	0.0	4.0	11.0	1.9	0.0	6.0	8.0	2.2	4.0	4.0	11.0	1.9	0.0	4.0	11.0	1.9	0.0	4.0	11.0	1.9	0.0	4.0	11.0	1.9	0.0	4.0	11.0	1.9	0.0	6.0
712	4.0	11.0	1.9	0.0	4.0	11.0	1.9	0.0	4.0	11.0	1.9	0.0	4.0	11.0	1.9	0.0	4.0	11.0	1.9	0.0	6.0	8.0	2.2	4.0	4.0	11.0	1.9	0.0	4.0	11.0	1.9	0.0	6.0	8.0	2.2	4.0	4.0	11.0	1.9	0.0	4.0	11.0	1.9	0.0	4.0	11.0	1.9	0.0	6.0
713	6.0	8.0	2.2	4.0	4.0	11.0	1.9	0.0	6.0	8.0	2.2	4.0	4.0	11.0	1.9	0.0	4.0	11.0	1.9	0.0	4.0	11.0	1.9	0.0	4.0	11.0	1.9	0.0	4.0	11.0	1.9	0.0	4.0	11.0	1.9	0.0	6.0	8.0	2.2	4.0	4.0	11.0	1.9	0.0	4.0	11.0	1.9	0.0	4.0
714	4.0	11.0	1.9	0.0	4.0	11.0	1.9	0.0	4.0	11.0	1.9	0.0	4.0	11.0	1.9	0.0	4.0	11.0	1.9	0.0	4.0	11.0	1.9	0.0	4.0	11.0	1.9	0.0	4.0	11.0	1.9	0.0	6.0	8.0	2.2	4.0	4.0	11.0	1.9	0.0	4.0	11.0	1.9	0.0	4.0	11.0	1.9	0.0	4.0
715	6.0	8.0	2.2	4.0	4.0	11.0	1.9	0.0	4.0	11.0	1.9	0.0	4.0	11.0	1.9	0.0	6.0	8.0	2.2	4.0	4.0	11.0	1.9	0.0	6.0	8.0	2.2	4.0	4.0	11.0	1.9	0.0	4.0	11.0	1.9	0.0	4.0	11.0	1.9	0.0	6.0	8.0	2.2	4.0	6.0	8.0	2.2	4.0	6.0
716	6.0	8.0	2.2	4.0	4.0	11.0	1.9	0.0	4.0	11.0	1.9	0.0	4.0	11.0	1.9	0.0	6.0	8.0	2.2	4.0	4.0	11.0	1.9	0.0	4.0	11.0	1.9	0.0	4.0	11.0	1.9	0.0	4.0	11.0	1.9	0.0	6.0	8.0	2.2	4.0	4.0	11.0	1.9	0.0	6.0	8.0	2.2	4.0	6.0
717	4.0	11.0	1.9	0.0	4.0	11.0	1.9	0.0	4.0	11.0	1.9	0.0	4.0	11.0	1.9	0.0	6.0	8.0	2.2	4.0	4.0	11.0	1.9	0.0	4.0	11.0	1.9	0.0	4.0	11.0	1.9	0.0	4.0	11.0	1.9	0.0	4.0	11.0	1.9	0.0	4.0	11.0	1.9	0.0	4.0	11.0	1.9	0.0	4.0
718	4.0	11.0	1.9	0.0	6.0	8.0	2.2	4.0	6.0	8.0	2.2	4.0	6.0	8.0	2.2	4.0	6.0	8.0	2.2	4.0	4.0	11.0	1.9	0.0	4.0	11.0	1.9	0.0	4.0	11.0	1.9	0.0	4.0	11.0	1.9	0.0	4.0	11.0	1.9	0.0	4.0	11.0	1.9	0.0	6.0	8.0	2.2	4.0	4.0
719	4.0	11.0	1.9	0.0	4.0	11.0	1.9	0.0	4.0	11.0	1.9	0.0	4.0	11.0	1.9	0.0	4.0	11.0	1.9	0.0	4.0	11.0	1.9	0.0	4.0	11.0	1.9	0.0	6.0	8.0	2.2	4.0	4.0	11.0	1.9	0.0	4.0	11.0	1.9	0.0	4.0	11.0	1.9	0.0	4.0	11.0	1.9	0.0	4.0
720	4.0	11.0	1.9	0.0	4.0	11.0	1.9	0.0	4.0	11.0	1.9	0.0	4.0	11.0	1.9	0.0	6.0	8.0	2.2	4.0	4.0	11.0	1.9	0.0	6.0	8.0	2.2	4.0	4.0	11.0	1.9	0.0	4.0	11.0	1.9	0.0	4.0	11.0	1.9	0.0	4.0	11.0	1.9	0.0	4.0	11.0	1.9	0.0	4.0
721	4.0	11.0	1.9	0.0	4.0	11.0	1.9	0.0	4.0	11.0	1.9	0.0	4.0	11.0	1.9	0.0	4.0	11.0	1.9	0.0	4.0	11.0	1.9	0.0	4.0	11.0	1.9	0.0	4.0	11.0	1.9	0.0	4.0	11.0	1.9	0.0	6.0	8.0	2.2	4.0	6.0	8.0	2.2	4.0	6.0	8.0	2.2	4.0	4.0
722	4.0	11.0	1.9	0.0	4.0	11.0	1.9	0.0	4.0	11.0	1.9	0.0	4.0	11.0	1.9	0.0	4.0	11.0	1.9	0.0	4.0	11.0	1.9	0.0	4.0	11.0	1.9	0.0	6.0	8.0	2.2	4.0	4.0	11.0	1.9	0.0	4.0	11.0	1.9	0.0	4.0	11.0	1.9	0.0	6.0	8.0	2.2	4.0	4.0
723	6.0	8.0	2.2	4.0	4.0	11.0	1.9	0.0	4.0	11.0	1.9	0.0	4.0	11.0	1.9	0.0	4.0	11.0	1.9	0.0	6.0	8.0	2.2	4.0	4.0	11.0	1.9	0.0	6.0	8.0	2.2	4.0	6.0	8.0	2.2	4.0	4.0	11.0	1.9	0.0	4.0	11.0	1.9	0.0	4.0	11.0	1.9	0.0	4.0
724	4.0	11.0	1.9	0.0	4.0	11.0	1.9	0.0	4.0	11.0	1.9	0.0	6.0	8.0	2.2	4.0	6.0	8.0	2.2	4.0	4.0	11.0	1.9	0.0	4.0	11.0	1.9	0.0	4.0	11.0	1.9	0.0	4.0	11.0	1.9	0.0	4.0	11.0	1.9	0.0	4.0	11.0	1.9	0.0	4.0	11.0	1.9	0.0	4.0
725	4.0	11.0	1.9	0.0	4.0	11.0	1.9	0.0	4.0	11.0	1.9	0.0	4.0	11.0	1.9	0.0	4.0	11.0	1.9	0.0	4.0	11.0	1.9	0.0	6.0	8.0	2.2	4.0	4.0	11.0	1.9	0.0	4.0	11.0	1.9	0.0	4.0	11.0	1.9	0.0	6.0	8.0	2.2	4.0	4.0	11.0	1.9	0.0	6.0
726	6.0	8.0	2.2	4.0	4.0	11.0	1.9	0.0	4.0	11.0	1.9	0.0	6.0	8.0	2.2	4.0	4.0	11.0	1.9	0.0	4.0	11.0	1.9	0.0	4.0	11.0	1.9	0.0	4.0	11.0	1.9	0.0	4.0	11.0	1.9	0.0	6.0	8.0	2.2	4.0	4.0	11.0	1.9	0.0	4.0	11.0	1.9	0.0	6.0
727	4.0	11.0	1.9	0.0	4.0	11.0	1.9	0.0	4.0	11.0	1.9	0.0	4.0	11.0	1.9	0.0	6.0	8.0	2.2	4.0	4.0	11.0	1.9	0.0	6.0	8.0	2.2	4.0	4.0	11.0	1.9	0.0	6.0	8.0	2.2	4.0	4.0	11.0	1.9	0.0	4.0	11.0	1.9	0.0	4.0	11.0	1.9	0.0	4.0
728	6.0	8.0	2.2	4.0	4.0	11.0	1.9	0.0	4.0	11.0	1.9	0.0	6.0	8.0	2.2	4.0	4.0	11.0	1.9	0.0	4.0	11.0	1.9	0.0	6.0	8.0	2.2	4.0	4.0	11.0	1.9	0.0	4.0	11.0	1.9	0.0	4.0	11.0	1.9	0.0	4.0	11.0	1.9	0.0	6.0	8.0	2.2	4.0	4.0
729	6.0	8.0	2.2	4.0	4.0	11.0	1.9	0.0	4.0	11.0	1.9	0.0	4.0	11.0	1.9	0.0	4.0	11.0	1.9	0.0	4.0	11.0	1.9	0.0	4.0	11.0	1.9	0.0	4.0	11.0	1.9	0.0	4.0	11.0	1.9	0.0	4.0	11.0	1.9	0.0	4.0	11.0	1.9	0.0	4.0	11.0	1.9	0.0	4.0
730	6.0	8.0	2.2	4.0	6.0	8.0	2.2	4.0	4.0	11.0	1.9	0.0	4.0	11.0	1.9	0.0	4.0	11.0	1.9	0.0	4.0	11.0	1.9	0.0	4.0	11.0	1.9	0.0	6.0	8.0	2.2	4.0	4.0	11.0	1.9	0.0	4.0	11.0	1.9	0.0	4.0	11.0	1.9	0.0	4.0	11.0	1.9	0.0	4.0
731	4.0	11.0	1.9	0.0	6.0	8.0	2.2	4.0	4.0	11.0	1.9	0.0	4.0	11.0	1.9	0.0	4.0	11.0	1.9	0.0	4.0	11.0	1.9	0.0	4.0	11.0	1.9	0.0	4.0	11.0	1.9	0.0	4.0	11.0	1.9	0.0	4.0	11.0	1.9	0.0	4.0	11.0	1.9	0.0	6.0	8.0	2.2	4.0	4.0
732	4.0	11.0	1.9	0.0	6.0	8.0	2.2	4.0	4.0	11.0	1.9	0.0	4.0	11.0	1.9	0.0	6.0	8.0	2.2	4.0	4.0	11.0	1.9	0.0	4.0	11.0	1.9	0.0	4.0	11.0	1.9	0.0	4.0	11.0	1.9	0.0	4.0	11.0	1.9	0.0	6.0	8.0	2.2	4.0	4.0	11.0	1.9	0.0	4.0
733	6.0	8.0	2.2	4.0	6.0	8.0	2.2	4.0	4.0	11.0	1.9	0.0	4.0	11.0	1.9	0.0	4.0	11.0	1.9	0.0	4.0	11.0	1.9	0.0	4.0	11.0	1.9	0.0	4.0	11.0	1.9	0.0	4.0	11.0	1.9	0.0	4.0	11.0	1.9	0.0	4.0	11.0	1.9	0.0	6.0	8.0	2.2	4.0	6.0
734	6.0	8.0	2.2	4.0	4.0	11.0	1.9	0.0	4.0	11.0	1.9	0.0	6.0	8.0	2.2	4.0	4.0	11.0	1.9	0.0	4.0	11.0	1.9	0.0	4.0	11.0	1.9	0.0	4.0	11.0	1.9	0.0	4.0	11.0	1.9	0.0	6.0	8.0	2.2	4.0	4.0	11.0	1.9	0.0	4.0	11.0	1.9	0.0	4.0
735	4.0	11.0	1.9	0.0	4.0	11.0	1.9	0.0	6.0	8.0	2.2	4.0	4.0	11.0	1.9	0.0	4.0	11.0	1.9	0.0	4.0	11.0	1.9	0.0	6.0	8.0	2.2	4.0	4.0	11.0	1.9	0.0	4.0	11.0	1.9	0.0	4.0	11.0	1.9	0.0	4.0	11.0	1.9	0.0	4.0	11.0	1.9	0.0	4.0
736	4.0	11.0	1.9	0.0	6.0	8.0	2.2	4.0	4.0	11.0	1.9	0.0	4.0	11.0	1.9	0.0	6.0	8.0	2.2	4.0	6.0	8.0	2.2	4.0	4.0	11.0	1.9	0.0	4.0	11.0	1.9	0.0	4.0	11.0	1.9	0.0	4.0	11.0	1.9	0.0	6.0	8.0	2.2	4.0	4.0	11.0	1.9	0.0	6.0
737	4.0	11.0	1.9	0.0	4.0	11.0	1.9	0.0	6.0	8.0	2.2	4.0	6.0	8.0	2.2	4.0	4.0	11.0	1.9	0.0	6.0	8.0	2.2	4.0	4.0	11.0	1.9	0.0	4.0	11.0	1.9	0.0	4.0	11.0	1.9	0.0	4.0	11.0	1.9	0.0	4.0	11.0	1.9	0.0	4.0	11.0	1.9	0.0	4.0
738	4.0	11.0	1.9	0.0	6.0	8.0	2.2	4.0	6.0	8.0	2.2	4.0	6.0	8.0	2.2	4.0	6.0	8.0	2.2	4.0	4.0	11.0	1.9	0.0	4.0	11.0	1.9	0.0	6.0	8.0	2.2	4.0	4.0	11.0	1.9	0.0	4.0	11.0	1.9	0.0	4.0	11.0	1.9	0.0	4.0	11.0	1.9	0.0	4.0
739	4.0	11.0	1.9	0.0	4.0	11.0	1.9	0.0	4.0	11.0	1.9	0.0	6.0	8.0	2.2	4.0	4.0	11.0	1.9	0.0	4.0	11.0	1.9	0.0	6.0	8.0	2.2	4.0	4.0	11.0	1.9	0.0	6.0	8.0	2.2	4.0	4.0	11.0	1.9	0.0	4.0	11.0	1.9	0.0	4.0	11.0	1.9	0.0	4.0
740	4.0	11.0	1.9	0.0	4.0	11.0	1.9	0.0	4.0	11.0	1.9	0.0	4.0	11.0	1.9	0.0	4.0	11.0	1.9	0.0	4.0	11.0	1.9	0.0	6.0	8.0	2.2	4.0	6.0	8.0	2.2	4.0	4.0	11.0	1.9	0.0	6.0	8.0	2.2	4.0	4.0	11.0	1.9	0.0	4.0	11.0	1.9	0.0	4.0
741	6.0	8.0	2.2	4.0	4.0	11.0	1.9	0.0	4.0	11.0	1.9	0.0	4.0	11.0	1.9	0.0	4.0	11.0	1.9	0.0	4.0	11.0	1.9	0.0	4.0	11.0	1.9	0.0	4.0	11.0	1.9	0.0	6.0	8.0	2.2	4.0	4.0	11.0	1.9	0.0	4.0	11.0	1.9	0.0	6.0	8.0	2.2	4.0	4.0
742	6.0	8.0	2.2	4.0	4.0	11.0	1.9	0.0	4.0	11.0	1.9	0.0	4.0	11.0	1.9	0.0	6.0	8.0	2.2	4.0	4.0	11.0	1.9	0.0	4.0	11.0	1.9	0.0	4.0	11.0	1.9	0.0	6.0	8.0	2.2	4.0	4.0	11.0	1.9	0.0	4.0	11.0	1.9	0.0	4.0	11.0	1.9	0.0	4.0
743	4.0	11.0	1.9	0.0	6.0	8.0	2.2	4.0	4.0	11.0	1.9	0.0	4.0	11.0	1.9	0.0	4.0	11.0	1.9	0.0	4.0	11.0	1.9	0.0	6.0	8.0	2.2	4.0	4.0	11.0	1.9	0.0	4.0	11.0	1.9	0.0	4.0	11.0	1.9	0.0	6.0	8.0	2.2	4.0	4.0	11.0	1.9	0.0	4.0
744	4.0	11.0	1.9	0.0	4.0	11.0	1.9	0.0	4.0	11.0	1.9	0.0	6.0	8.0	2.2	4.0	4.0	11.0	1.9	0.0	6.0	8.0	2.2	4.0	4.0	11.0	1.9	0.0	4.0	11.0	1.9	0.0	4.0	11.0	1.9	0.0	6.0	8.0	2.2	4.0	4.0	11.0	1.9	0.0	6.0	8.0	2.2	4.0	4.0
745	6.0	8.0	2.2	4.0	4.0	11.0	1.9	0.0	6.0	8.0	2.2	4.0	6.0	8.0	2.2	4.0	4.0	11.0	1.9	0.0	6.0	8.0	2.2	4.0	4.0	11.0	1.9	0.0	4.0	11.0	1.9	0.0	4.0	11.0	1.9	0.0	4.0	11.0	1.9	0.0	6.0	8.0	2.2	4.0	4.0	11.0	1.9	0.0	4.0
746	4.0	11.0	1.9	0.0	6.0	8.0	2.2	4.0	4.0	11.0	1.9	0.0	4.0	11.0	1.9	0.0	4.0	11.0	1.9	0.0	6.0	8.0	2.2	4.0	6.0	8.0	2.2	4.0	4.0	11.0	1.9	0.0	4.0	11.0	1.9	0.0	4.0	11.0	1.9	0.0	4.0	11.0	1.9	0.0	4.0	11.0	1.9	0.0	4.0
747	4.0	11.0	1.9	0.0	4.0	11.0	1.9	0.0	4.0	11.0	1.9	0.0	4.0	11.0	1.9	0.0	6.0	8.0	2.2	4.0	4.0	11.0	1.9	0.0	4.0	11.0	1.9	0.0	6.0	8.0	2.2	4.0	4.0	11.0	1.9	0.0	4.0	11.0	1.9	0.0	4.0	11.0	1.9	0.0	4.0	11.0	1.9	0.0	4.0
748	6.0	8.0	2.2	4.0	4.0	11.0	1.9	0.0	4.0	11.0	1.9	0.0	4.0	11.0	1.9	0.0	4.0	11.0	1.9	0.0	6.0	8.0	2.2	4.0	4.0	11.0	1.9	0.0	4.0	11.0	1.9	0.0	4.0	11.0	1.9	0.0	6.0	8.0	2.2	4.0	4.0	11.0	1.9	0.0	4.0	11.0	1.9	0.0	4.0
749	4.0	11.0	1.9	0.0	4.0	11.0	1.9	0.0	4.0	11.0	1.9	0.0	4.0	11.0	1.9	0.0	4.0	11.0	1.9	0.0	6.0	8.0	2.2	4.0	4.0	11.0	1.9	0.0	4.0	11.0	1.9	0.0	4.0	11.0	1.9	0.0	4.0	11.0	1.9	0.0	4.0	11.0	1.9	0.0	4.0	11.0	1.9	0.0	4.0
750	4.0	11.0	1.9	0.0	4.0	11.0	1.9	0.0	6.0	8.0	2.2	4.0	6.0	8.0	2.2	4.0	4.0	11.0	1.9	0.0	4.0	11.0	1.9	0.0	4.0	11.0	1.9	0.0	4.0	11.0	1.9	0.0	4.0	11.0	1.9	0.0	4.0	11.0	1.9	0.0	4.0	11.0	1.9	0.0	4.0	11.0	1.9	0.0	4.0
751	4.0	11.0	1.9	0.0	6.0	8.0	2.2	4.0	4.0	11.0	1.9	0.0	6.0	8.0	2.2	4.0	4.0	11.0	1.9	0.0	4.0	11.0	1.9	0.0	6.0	8.0	2.2	4.0	6.0	8.0	2.2	4.0	4.0	11.0	1.9	0.0	4.0	11.0	1.9	0.0	4.0	11.0	1.9	0.0	6.0	8.0	2.2	4.0	4.0
752	4.0	11.0	1.9	0.0	4.0	11.0	1.9	0.0	6.0	8.0	2.2	4.0	4.0	11.0	1.9	0.0	4.0	11.0	1.9	0.0	4.0	11.0	1.9	0.0	6.0	8.0	2.2	4.0	4.0	11.0	1.9	0.0	4.0	11.0	1.9	0.0	4.0	11.0	1.9	0.0	4.0	11.0	1.9	0.0	4.0	11.0	1.9	0.0	6.0
753	4.0	11.0	1.9	0.0	4.0	11.0	1.9	0.0	4.0	11.0	1.9	0.0	4.0	11.0	1.9	0.0	6.0	8.0	2.2	4.0	4.0	11.0	1.9	0.0	6.0	8.0	2.2	4.0	4.0	11.0	1.9	0.0	4.0	11.0	1.9	0.0	4.0	11.0	1.9	0.0	4.0	11.0	1.9	0.0	4.0	11.0	1.9	0.0	6.0
754	4.0	11.0	1.9	0.0	4.0	11.0	1.9	0.0	4.0	11.0	1.9	0.0	4.0	11.0	1.9	0.0	6.0	8.0	2.2	4.0	4.0	11.0	1.9	0.0	6.0	8.0	2.2	4.0	4.0	11.0	1.9	0.0	4.0	11.0	1.9	0.0	6.0	8.0	2.2	4.0	4.0	11.0	1.9	0.0	6.0	8.0	2.2	4.0	4.0
755	4.0	11.0	1.9	0.0	4.0	11.0	1.9	0.0	4.0	11.0	1.9	0.0	4.0	11.0	1.9	0.0	4.0	11.0	1.9	0.0	4.0	11.0	1.9	0.0	4.0	11.0	1.9	0.0	4.0	11.0	1.9	0.0	4.0	11.0	1.9	0.0	6.0	8.0	2.2	4.0	6.0	8.0	2.2	4.0	4.0	11.0	1.9	0.0	4.0
756	6.0	8.0	2.2	4.0	4.0	11.0	1.9	0.0	4.0	11.0	1.9	0.0	4.0	11.0	1.9	0.0	4.0	11.0	1.9	0.0	6.0	8.0	2.2	4.0	4.0	11.0	1.9	0.0	6.0	8.0	2.2	4.0	4.0	11.0	1.9	0.0	6.0	8.0	2.2	4.0	6.0	8.0	2.2	4.0	6.0	8.0	2.2	4.0	4.0
757	4.0	11.0	1.9	0.0	6.0	8.0	2.2	4.0	4.0	11.0	1.9	0.0	4.0	11.0	1.9	0.0	6.0	8.0	2.2	4.0	4.0	11.0	1.9	0.0	6.0	8.0	2.2	4.0	6.0	8.0	2.2	4.0	4.0	11.0	1.9	0.0	4.0	11.0	1.9	0.0	4.0	11.0	1.9	0.0	6.0	8.0	2.2	4.0	4.0
758	4.0	11.0	1.9	0.0	6.0	8.0	2.2	4.0	6.0	8.0	2.2	4.0	4.0	11.0	1.9	0.0	4.0	11.0	1.9	0.0	6.0	8.0	2.2	4.0	4.0	11.0	1.9	0.0	6.0	8.0	2.2	4.0	4.0	11.0	1.9	0.0	4.0	11.0	1.9	0.0	6.0	8.0	2.2	4.0	6.0	8.0	2.2	4.0	4.0
759	6.0	8.0	2.2	4.0	4.0	11.0	1.9	0.0	6.0	8.0	2.2	4.0	4.0	11.0	1.9	0.0	4.0	11.0	1.9	0.0	4.0	11.0	1.9	0.0	4.0	11.0	1.9	0.0	4.0	11.0	1.9	0.0	6.0	8.0	2.2	4.0	4.0	11.0	1.9	0.0	4.0	11.0	1.9	0.0	4.0	11.0	1.9	0.0	4.0
760	4.0	11.0	1.9	0.0	4.0	11.0	1.9	0.0	4.0	11.0	1.9	0.0	4.0	11.0	1.9	0.0	4.0	11.0	1.9	0.0	4.0	11.0	1.9	0.0	6.0	8.0	2.2	4.0	4.0	11.0	1.9	0.0	6.0	8.0	2.2	4.0	4.0	11.0	1.9	0.0	4.0	11.0	1.9	0.0	4.0	11.0	1.9	0.0	4.0
761	6.0	8.0	2.2	4.0	4.0	11.0	1.9	0.0	4.0	11.0	1.9	0.0	6.0	8.0	2.2	4.0	4.0	11.0	1.9	0.0	6.0	8.0	2.2	4.0	4.0	11.0	1.9	0.0	4.0	11.0	1.9	0.0	4.0	11.0	1.9	0.0	4.0	11.0	1.9	0.0	4.0	11.0	1.9	0.0	4.0	11.0	1.9	0.0	4.0
762	4.0	11.0	1.9	0.0	4.0	11.0	1.9	0.0	6.0	8.0	2.2	4.0	4.0	11.0	1.9	0.0	4.0	11.0	1.9	0.0	4.0	11.0	1.9	0.0	4.0	11.0	1.9	0.0	4.0	11.0	1.9	0.0	4.0	11.0	1.9	0.0	6.0	8.0	2.2	4.0	6.0	8.0	2.2	4.0	4.0	11.0	1.9	0.0	4.0
763	4.0	11.0	1.9	0.0	4.0	11.0	1.9	0.0	4.0	11.0	1.9	0.0	4.0	11.0	1.9	0.0	4.0	11.0	1.9	0.0	4.0	11.0	1.9	0.0	6.0	8.0	2.2	4.0	4.0	11.0	1.9	0.0	6.0	8.0	2.2	4.0	4.0	11.0	1.9	0.0	4.0	11.0	1.9	0.0	4.0	11.0	1.9	0.0	6.0
764	4.0	11.0	1.9	0.0	4.0	11.0	1.9	0.0	6.0	8.0	2.2	4.0	4.0	11.0	1.9	0.0	6.0	8.0	2.2	4.0	4.0	11.0	1.9	0.0	4.0	11.0	1.9	0.0	4.0	11.0	1.9	0.0	6.0	8.0	2.2	4.0	4.0	11.0	1.9	0.0	4.0	11.0	1.9	0.0	4.0	11.0	1.9	0.0	4.0
765	4.0	11.0	1.9	0.0	4.0	11.0	1.9	0.0	6.0	8.0	2.2	4.0	4.0	11.0	1.9	0.0	6.0	8.0	2.2	4.0	4.0	11.0	1.9	0.0	4.0	11.0	1.9	0.0	4.0	11.0	1.9	0.0	4.0	11.0	1.9	0.0	4.0	11.0	1.9	0.0	4.0	11.0	1.9	0.0	4.0	11.0	1.9	0.0	6.0
766	4.0	11.0	1.9	0.0	4.0	11.0	1.9	0.0	4.0	11.0	1.9	0.0	6.0	8.0	2.2	4.0	4.0	11.0	1.9	0.0	4.0	11.0	1.9	0.0	6.0	8.0	2.2	4.0	6.0	8.0	2.2	4.0	4.0	11.0	1.9	0.0	4.0	11.0	1.9	0.0	4.0	11.0	1.9	0.0	4.0	11.0	1.9	0.0	4.0
767	4.0	11.0	1.9	0.0	4.0	11.0	1.9	0.0	4.0	11.0	1.9	0.0	4.0	11.0	1.9	0.0	4.0	11.0	1.9	0.0	6.0	8.0	2.2	4.0	4.0	11.0	1.9	0.0	4.0	11.0	1.9	0.0	4.0	11.0	1.9	0.0	6.0	8.0	2.2	4.0	4.0	11.0	1.9	0.0	6.0	8.0	2.2	4.0	4.0
768	4.0	11.0	1.9	0.0	6.0	8.0	2.2	4.0	4.0	11.0	1.9	0.0	4.0	11.0	1.9	0.0	4.0	11.0	1.9	0.0	4.0	11.0	1.9	0.0	4.0	11.0	1.9	0.0	4.0	11.0	1.9	0.0	6.0	8.0	2.2	4.0	4.0	11.0	1.9	0.0	4.0	11.0	1.9	0.0	4.0	11.0	1.9	0.0	4.0
769	4.0	11.0	1.9	0.0	4.0	11.0	1.9	0.0	6.0	8.0	2.2	4.0	6.0	8.0	2.2	4.0	4.0	11.0	1.9	0.0	4.0	11.0	1.9	0.0	4.0	11.0	1.9	0.0	4.0	11.0	1.9	0.0	6.0	8.0	2.2	4.0	4.0	11.0	1.9	0.0	6.0	8.0	2.2	4.0	4.0	11.0	1.9	0.0	6.0
770	4.0	11.0	1.9	0.0	6.0	8.0	2.2	4.0	4.0	11.0	1.9	0.0	6.0	8.0	2.2	4.0	4.0	11.0	1.9	0.0	6.0	8.0	2.2	4.0	6.0	8.0	2.2	4.0	4.0	11.0	1.9	0.0	4.0	11.0	1.9	0.0	4.0	11.0	1.9	0.0	4.0	11.0	1.9	0.0	4.0	11.0	1.9	0.0	4.0
771	6.0	8.0	2.2	4.0	4.0	11.0	1.9	0.0	4.0	11.0	1.9	0.0	6.0	8.0	2.2	4.0	6.0	8.0	2.2	4.0	4.0	11.0	1.9	0.0	4.0	11.0	1.9	0.0	4.0	11.0	1.9	0.0	4.0	11.0	1.9	0.0	4.0	11.0	1.9	0.0	4.0	11.0	1.9	0.0	4.0	11.0	1.9	0.0	4.0
772	4.0	11.0	1.9	0.0	4.0	11.0	1.9	0.0	4.0	11.0	1.9	0.0	4.0	11.0	1.9	0.0	6.0	8.0	2.2	4.0	4.0	11.0	1.9	0.0	4.0	11.0	1.9	0.0	4.0	11.0	1.9	0.0	6.0	8.0	2.2	4.0	6.0	8.0	2.2	4.0	4.0	11.0	1.9	0.0	6.0	8.0	2.2	4.0	4.0
773	6.0	8.0	2.2	4.0	4.0	11.0	1.9	0.0	6.0	8.0	2.2	4.0	4.0	11.0	1.9	0.0	6.0	8.0	2.2	4.0	6.0	8.0	2.2	4.0	6.0	8.0	2.2	4.0	4.0	11.0	1.9	0.0	4.0	11.0	1.9	0.0	4.0	11.0	1.9	0.0	4.0	11.0	1.9	0.0	4.0	11.0	1.9	0.0	4.0
774	6.0	8.0	2.2	4.0	4.0	11.0	1.9	0.0	4.0	11.0	1.9	0.0	4.0	11.0	1.9	0.0	4.0	11.0	1.9	0.0	4.0	11.0	1.9	0.0	4.0	11.0	1.9	0.0	4.0	11.0	1.9	0.0	6.0	8.0	2.2	4.0	6.0	8.0	2.2	4.0	4.0	11.0	1.9	0.0	4.0	11.0	1.9	0.0	4.0
775	4.0	11.0	1.9	0.0	4.0	11.0	1.9	0.0	6.0	8.0	2.2	4.0	6.0	8.0	2.2	4.0	4.0	11.0	1.9	0.0	4.0	11.0	1.9	0.0	4.0	11.0	1.9	0.0	4.0	11.0	1.9	0.0	6.0	8.0	2.2	4.0	4.0	11.0	1.9	0.0	6.0	8.0	2.2	4.0	4.0	11.0	1.9	0.0	4.0
776	4.0	11.0	1.9	0.0	6.0	8.0	2.2	4.0	4.0	11.0	1.9	0.0	4.0	11.0	1.9	0.0	6.0	8.0	2.2	4.0	4.0	11.0	1.9	0.0	6.0	8.0	2.2	4.0	4.0	11.0	1.9	0.0	4.0	11.0	1.9	0.0	4.0	11.0	1.9	0.0	4.0	11.0	1.9	0.0	4.0	11.0	1.9	0.0	4.0
777	6.0	8.0	2.2	4.0	4.0	11.0	1.9	0.0	4.0	11.0	1.9	0.0	4.0	11.0	1.9	0.0	4.0	11.0	1.9	0.0	4.0	11.0	1.9	0.0	4.0	11.0	1.9	0.0	4.0	11.0	1.9	0.0	4.0	11.0	1.9	0.0	6.0	8.0	2.2	4.0	4.0	11.0	1.9	0.0	4.0	11.0	1.9	0.0	4.0
778	4.0	11.0	1.9	0.0	4.0	11.0	1.9	0.0	6.0	8.0	2.2	4.0	4.0	11.0	1.9	0.0	4.0	11.0	1.9	0.0	4.0	11.0	1.9	0.0	6.0	8.0	2.2	4.0	6.0	8.0	2.2	4.0	4.0	11.0	1.9	0.0	6.0	8.0	2.2	4.0	4.0	11.0	1.9	0.0	6.0	8.0	2.2	4.0	4.0
779	4.0	11.0	1.9	0.0	6.0	8.0	2.2	4.0	4.0	11.0	1.9	0.0	6.0	8.0	2.2	4.0	4.0	11.0	1.9	0.0	6.0	8.0	2.2	4.0	4.0	11.0	1.9	0.0	4.0	11.0	1.9	0.0	6.0	8.0	2.2	4.0	4.0	11.0	1.9	0.0	4.0	11.0	1.9	0.0	4.0	11.0	1.9	0.0	4.0
780	6.0	8.0	2.2	4.0	6.0	8.0	2.2	4.0	4.0	11.0	1.9	0.0	4.0	11.0	1.9	0.0	4.0	11.0	1.9	0.0	4.0	11.0	1.9	0.0	4.0	11.0	1.9	0.0	6.0	8.0	2.2	4.0	6.0	8.0	2.2	4.0	4.0	11.0	1.9	0.0	4.0	11.0	1.9	0.0	6.0	8.0	2.2	4.0	4.0
781	4.0	11.0	1.9	0.0	4.0	11.0	1.9	0.0	4.0	11.0	1.9	0.0	6.0	8.0	2.2	4.0	4.0	11.0	1.9	0.0	4.0	11.0	1.9	0.0	4.0	11.0	1.9	0.0	4.0	11.0	1.9	0.0	4.0	11.0	1.9	0.0	4.0	11.0	1.9	0.0	4.0	11.0	1.9	0.0	4.0	11.0	1.9	0.0	6.0
782	4.0	11.0	1.9	0.0	4.0	11.0	1.9	0.0	6.0	8.0	2.2	4.0	6.0	8.0	2.2	4.0	4.0	11.0	1.9	0.0	4.0	11.0	1.9	0.0	4.0	11.0	1.9	0.0	4.0	11.0	1.9	0.0	4.0	11.0	1.9	0.0	4.0	11.0	1.9	0.0	4.0	11.0	1.9	0.0	4.0	11.0	1.9	0.0	6.0
783	4.0	11.0	1.9	0.0	4.0	11.0	1.9	0.0	6.0	8.0	2.2	4.0	4.0	11.0	1.9	0.0	4.0	11.0	1.9	0.0	4.0	11.0	1.9	0.0	4.0	11.0	1.9	0.0	6.0	8.0	2.2	4.0	4.0	11.0	1.9	0.0	4.0	11.0	1.9	0.0	4.0	11.0	1.9	0.0	4.0	11.0	1.9	0.0	4.0
784	4.0	11.0	1.9	0.0	4.0	11.0	1.9	0.0	4.0	11.0	1.9	0.0	4.0	11.0	1.9	0.0	4.0	11.0	1.9	0.0	4.0	11.0	1.9	0.0	4.0	11.0	1.9	0.0	4.0	11.0	1.9	0.0	4.0	11.0	1.9	0.0	4.0	11.0	1.9	0.0	4.0	11.0	1.9	0.0	6.0	8.0	2.2	4.0	6.0
785	6.0	8.0	2.2	4.0	6.0	8.0	2.2	4.0	6.0	8.0	2.2	4.0	4.0	11.0	1.9	0.0	6.0	8.0	2.2	4.0	4.0	11.0	1.9	0.0	4.0	11.0	1.9	0.0	4.0	11.0	1.9	0.0	4.0	11.0	1.9	0.0	4.0	11.0	1.9	0.0	4.0	11.0	1.9	0.0	4.0	11.0	1.9	0.0	4.0
786	6.0	8.0	2.2	4.0	6.0	8.0	2.2	4.0	4.0	11.0	1.9	0.0	4.0	11.0	1.9	0.0	4.0	11.0	1.9	0.0	4.0	11.0	1.9	0.0	4.0	11.0	1.9	0.0	4.0	11.0	1.9	0.0	4.0	11.0	1.9	0.0	6.0	8.0	2.2	4.0	4.0	11.0	1.9	0.0	6.0	8.0	2.2	4.0	4.0
787	4.0	11.0	1.9	0.0	4.0	11.0	1.9	0.0	4.0	11.0	1.9	0.0	4.0	11.0	1.9	0.0	4.0	11.0	1.9	0.0	4.0	11.0	1.9	0.0	4.0	11.0	1.9	0.0	4.0	11.0	1.9	0.0	4.0	11.0	1.9	0.0	6.0	8.0	2.2	4.0	4.0	11.0	1.9	0.0	6.0	8.0	2.2	4.0	6.0
788	4.0	11.0	1.9	0.0	6.0	8.0	2.2	4.0	4.0	11.0	1.9	0.0	4.0	11.0	1.9	0.0	4.0	11.0	1.9	0.0	4.0	11.0	1.9	0.0	4.0	11.0	1.9	0.0	4.0	11.0	1.9	0.0	4.0	11.0	1.9	0.0	4.0	11.0	1.9	0.0	4.0	11.0	1.9	0.0	4.0	11.0	1.9	0.0	6.0
789	4.0	11.0	1.9	0.0	4.0	11.0	1.9	0.0	6.0	8.0	2.2	4.0	4.0	11.0	1.9	0.0	6.0	8.0	2.2	4.0	4.0	11.0	1.9	0.0	4.0	11.0	1.9	0.0	4.0	11.0	1.9	0.0	4.0	11.0	1.9	0.0	4.0	11.0	1.9	0.0	6.0	8.0	2.2	4.0	4.0	11.0	1.9	0.0	4.0
790	4.0	11.0	1.9	0.0	6.0	8.0	2.2	4.0	4.0	11.0	1.9	0.0	6.0	8.0	2.2	4.0	4.0	11.0	1.9	0.0	4.0	11.0	1.9	0.0	6.0	8.0	2.2	4.0	4.0	11.0	1.9	0.0	4.0	11.0	1.9	0.0	6.0	8.0	2.2	4.0	4.0	11.0	1.9	0.0	4.0	11.0	1.9	0.0	4.0
791	4.0	11.0	1.9	0.0	6.0	8.0	2.2	4.0	4.0	11.0	1.9	0.0	4.0	11.0	1.9	0.0	4.0	11.0	1.9	0.0	4.0	11.0	1.9	0.0	6.0	8.0	2.2	4.0	4.0	11.0	1.9	0.0	4.0	11.0	1.9	0.0	4.0	11.0	1.9	0.0	4.0	11.0	1.9	0.0	6.0	8.0	2.2	4.0	4.0
792	4.0	11.0	1.9	0.0	4.0	11.0	1.9	0.0	4.0	11.0	1.9	0.0	4.0	11.0	1.9	0.0	4.0	11.0	1.9	0.0	6.0	8.0	2.2	4.0	4.0	11.0	1.9	0.0	6.0	8.0	2.2	4.0	4.0	11.0	1.9	0.0	6.0	8.0	2.2	4.0	6.0	8.0	2.2	4.0	4.0	11.0	1.9	0.0	6.0
793	4.0	11.0	1.9	0.0	4.0	11.0	1.9	0.0	4.0	11.0	1.9	0.0	4.0	11.0	1.9	0.0	6.0	8.0	2.2	4.0	4.0	11.0	1.9	0.0	6.0	8.0	2.2	4.0	6.0	8.0	2.2	4.0	4.0	11.0	1.9	0.0	4.0	11.0	1.9	0.0	4.0	11.0	1.9	0.0	4.0	11.0	1.9	0.0	6.0
794	4.0	11.0	1.9	0.0	6.0	8.0	2.2	4.0	6.0	8.0	2.2	4.0	4.0	11.0	1.9	0.0	4.0	11.0	1.9	0.0	4.0	11.0	1.9	0.0	4.0	11.0	1.9	0.0	6.0	8.0	2.2	4.0	4.0	11.0	1.9	0.0	4.0	11.0	1.9	0.0	4.0	11.0	1.9	0.0	4.0	11.0	1.9	0.0	4.0
795	4.0	11.0	1.9	0.0	6.0	8.0	2.2	4.0	4.0	11.0	1.9	0.0	4.0	11.0	1.9	0.0	4.0	11.0	1.9	0.0	6.0	8.0	2.2	4.0	6.0	8.0	2.2	4.0	4.0	11.0	1.9	0.0	4.0	11.0	1.9	0.0	4.0	11.0	1.9	0.0	4.0	11.0	1.9	0.0	4.0	11.0	1.9	0.0	6.0
796	4.0	11.0	1.9	0.0	4.0	11.0	1.9	0.0	4.0	11.0	1.9	0.0	6.0	8.0	2.2	4.0	6.0	8.0	2.2	4.0	4.0	11.0	1.9	0.0	6.0	8.0	2.2	4.0	4.0	11.0	1.9	0.0	4.0	11.0	1.9	0.0	4.0	11.0	1.9	0.0	4.0	11.0	1.9	0.0	4.0	11.0	1.9	0.0	4.0
797	4.0	11.0	1.9	0.0	4.0	11.0	1.9	0.0	4.0	11.0	1.9	0.0	4.0	11.0	1.9	0.0	4.0	11.0	1.9	0.0	6.0	8.0	2.2	4.0	4.0	11.0	1.9	0.0	4.0	11.0	1.9	0.0	4.0	11.0	1.9	0.0	4.0	11.0	1.9	0.0	6.0	8.0	2.2	4.0	4.0	11.0	1.9	0.0	4.0
798	4.0	11.0	1.9	0.0	4.0	11.0	1.9	0.0	4.0	11.0	1.9	0.0	4.0	11.0	1.9	0.0	4.0	11.0	1.9	0.0	4.0	11.0	1.9	0.0	4.0	11.0	1.9	0.0	6.0	8.0	2.2	4.0	4.0	11.0	1.9	0.0	4.0	11.0	1.9	0.0	6.0	8.0	2.2	4.0	4.0	11.0	1.9	0.0	4.0
799	6.0	8.0	2.2	4.0	4.0	11.0	1.9	0.0	6.0	8.0	2.2	4.0	4.0	11.0	1.9	0.0	4.0	11.0	1.9	0.0	4.0	11.0	1.9	0.0	4.0	11.0	1.9	0.0	4.0	11.0	1.9	0.0	4.0	11.0	1.9	0.0	4.0	11.0	1.9	0.0	4.0	11.0	1.9	0.0	4.0	11.0	1.9	0.0	6.0
800	6.0	8.0	2.2	4.0	6.0	8.0	2.2	4.0	4.0	11.0	1.9	0.0	4.0	11.0	1.9	0.0	4.0	11.0	1.9	0.0	4.0	11.0	1.9	0.0	4.0	11.0	1.9	0.0	4.0	11.0	1.9	0.0	4.0	11.0	1.9	0.0	4.0	11.0	1.9	0.0	6.0	8.0	2.2	4.0	4.0	11.0	1.9	0.0	4.0
801	4.0	11.0	1.9	0.0	4.0	11.0	1.9	0.0	4.0	11.0	1.9	0.0	4.0	11.0	1.9	0.0	6.0	8.0	2.2	4.0	4.0	11.0	1.9	0.0	6.0	8.0	2.2	4.0	6.0	8.0	2.2	4.0	4.0	11.0	1.9	0.0	4.0	11.0	1.9	0.0	4.0	11.0	1.9	0.0	4.0	11.0	1.9	0.0	4.0
802	4.0	11.0	1.9	0.0	6.0	8.0	2.2	4.0	4.0	11.0	1.9	0.0	4.0	11.0	1.9	0.0	4.0	11.0	1.9	0.0	6.0	8.0	2.2	4.0	4.0	11.0	1.9	0.0	4.0	11.0	1.9	0.0	4.0	11.0	1.9	0.0	4.0	11.0	1.9	0.0	4.0	11.0	1.9	0.0	6.0	8.0	2.2	4.0	4.0
803	6.0	8.0	2.2	4.0	4.0	11.0	1.9	0.0	4.0	11.0	1.9	0.0	4.0	11.0	1.9	0.0	4.0	11.0	1.9	0.0	4.0	11.0	1.9	0.0	4.0	11.0	1.9	0.0	4.0	11.0	1.9	0.0	4.0	11.0	1.9	0.0	4.0	11.0	1.9	0.0	4.0	11.0	1.9	0.0	6.0	8.0	2.2	4.0	6.0
804	6.0	8.0	2.2	4.0	6.0	8.0	2.2	4.0	4.0	11.0	1.9	0.0	6.0	8.0	2.2	4.0	4.0	11.0	1.9	0.0	4.0	11.0	1.9	0.0	4.0	11.0	1.9	0.0	4.0	11.0	1.9	0.0	4.0	11.0	1.9	0.0	4.0	11.0	1.9	0.0	4.0	11.0	1.9	0.0	4.0	11.0	1.9	0.0	4.0
805	6.0	8.0	2.2	4.0	6.0	8.0	2.2	4.0	4.0	11.0	1.9	0.0	6.0	8.0	2.2	4.0	4.0	11.0	1.9	0.0	6.0	8.0	2.2	4.0	4.0	11.0	1.9	0.0	4.0	11.0	1.9	0.0	6.0	8.0	2.2	4.0	4.0	11.0	1.9	0.0	4.0	11.0	1.9	0.0	4.0	11.0	1.9	0.0	6.0
806	4.0	11.0	1.9	0.0	4.0	11.0	1.9	0.0	4.0	11.0	1.9	0.0	4.0	11.0	1.9	0.0	4.0	11.0	1.9	0.0	4.0	11.0	1.9	0.0	4.0	11.0	1.9	0.0	4.0	11.0	1.9	0.0	6.0	8.0	2.2	4.0	4.0	11.0	1.9	0.0	4.0	11.0	1.9	0.0	4.0	11.0	1.9	0.0	6.0
807	6.0	8.0	2.2	4.0	6.0	8.0	2.2	4.0	4.0	11.0	1.9	0.0	6.0	8.0	2.2	4.0	4.0	11.0	1.9	0.0	4.0	11.0	1.9	0.0	4.0	11.0	1.9	0.0	4.0	11.0	1.9	0.0	6.0	8.0	2.2	4.0	4.0	11.0	1.9	0.0	4.0	11.0	1.9	0.0	4.0	11.0	1.9	0.0	4.0
808	4.0	11.0	1.9	0.0	6.0	8.0	2.2	4.0	4.0	11.0	1.9	0.0	6.0	8.0	2.2	4.0	4.0	11.0	1.9	0.0	4.0	11.0	1.9	0.0	4.0	11.0	1.9	0.0	4.0	11.0	1.9	0.0	4.0	11.0	1.9	0.0	4.0	11.0	1.9	0.0	4.0	11.0	1.9	0.0	6.0	8.0	2.2	4.0	4.0
809	4.0	11.0	1.9	0.0	4.0	11.0	1.9	0.0	4.0	11.0	1.9	0.0	6.0	8.0	2.2	4.0	6.0	8.0	2.2	4.0	4.0	11.0	1.9	0.0	4.0	11.0	1.9	0.0	4.0	11.0	1.9	0.0	6.0	8.0	2.2	4.0	4.0	11.0	1.9	0.0	4.0	11.0	1.9	0.0	4.0	11.0	1.9	0.0	4.0
810	4.0	11.0	1.9	0.0	4.0	11.0	1.9	0.0	4.0	11.0	1.9	0.0	6.0	8.0	2.2	4.0	4.0	11.0	1.9	0.0	4.0	11.0	1.9	0.0	4.0	11.0	1.9	0.0	6.0	8.0	2.2	4.0	4.0	11.0	1.9	0.0	4.0	11.0	1.9	0.0	4.0	11.0	1.9	0.0	4.0	11.0	1.9	0.0	6.0
811	4.0	11.0	1.9	0.0	6.0	8.0	2.2	4.0	6.0	8.0	2.2	4.0	4.0	11.0	1.9	0.0	6.0	8.0	2.2	4.0	4.0	11.0	1.9	0.0	4.0	11.0	1.9	0.0	6.0	8.0	2.2	4.0	4.0	11.0	1.9	0.0	4.0	11.0	1.9	0.0	6.0	8.0	2.2	4.0	4.0	11.0	1.9	0.0	4.0
812	4.0	11.0	1.9	0.0	6.0	8.0	2.2	4.0	4.0	11.0	1.9	0.0	4.0	11.0	1.9	0.0	4.0	11.0	1.9	0.0	6.0	8.0	2.2	4.0	4.0	11.0	1.9	0.0	4.0	11.0	1.9	0.0	4.0	11.0	1.9	0.0	4.0	11.0	1.9	0.0	6.0	8.0	2.2	4.0	4.0	11.0	1.9	0.0	6.0
813	6.0	8.0	2.2	4.0	4.0	11.0	1.9	0.0	4.0	11.0	1.9	0.0	4.0	11.0	1.9	0.0	4.0	11.0	1.9	0.0	4.0	11.0	1.9	0.0	6.0	8.0	2.2	4.0	4.0	11.0	1.9	0.0	4.0	11.0	1.9	0.0	4.0	11.0	1.9	0.0	4.0	11.0	1.9	0.0	6.0	8.0	2.2	4.0	4.0
814	6.0	8.0	2.2	4.0	4.0	11.0	1.9	0.0	4.0	11.0	1.9	0.0	6.0	8.0	2.2	4.0	4.0	11.0	1.9	0.0	4.0	11.0	1.9	0.0	4.0	11.0	1.9	0.0	4.0	11.0	1.9	0.0	6.0	8.0	2.2	4.0	4.0	11.0	1.9	0.0	4.0	11.0	1.9	0.0	4.0	11.0	1.9	0.0	4.0
815	4.0	11.0	1.9	0.0	4.0	11.0	1.9	0.0	4.0	11.0	1.9	0.0	4.0	11.0	1.9	0.0	4.0	11.0	1.9	0.0	6.0	8.0	2.2	4.0	4.0	11.0	1.9	0.0	6.0	8.0	2.2	4.0	4.0	11.0	1.9	0.0	4.0	11.0	1.9	0.0	4.0	11.0	1.9	0.0	4.0	11.0	1.9	0.0	4.0
816	6.0	8.0	2.2	4.0	4.0	11.0	1.9	0.0	4.0	11.0	1.9	0.0	4.0	11.0	1.9	0.0	4.0	11.0	1.9	0.0	4.0	11.0	1.9	0.0	4.0	11.0	1.9	0.0	4.0	11.0	1.9	0.0	4.0	11.0	1.9	0.0	4.0	11.0	1.9	0.0	4.0	11.0	1.9	0.0	6.0	8.0	2.2	4.0	4.0
817	4.0	11.0	1.9	0.0	4.0	11.0	1.9	0.0	4.0	11.0	1.9	0.0	4.0	11.0	1.9	0.0	6.0	8.0	2.2	4.0	4.0	11.0	1.9	0.0	4.0	11.0	1.9	0.0	4.0	11.0	1.9	0.0	4.0	11.0	1.9	0.0	6.0	8.0	2.2	4.0	4.0	11.0	1.9	0.0	4.0	11.0	1.9	0.0	4.0
818	4.0	11.0	1.9	0.0	6.0	8.0	2.2	4.0	6.0	8.0	2.2	4.0	4.0	11.0	1.9	0.0	4.0	11.0	1.9	0.0	4.0	11.0	1.9	0.0	6.0	8.0	2.2	4.0	4.0	11.0	1.9	0.0	4.0	11.0	1.9	0.0	6.0	8.0	2.2	4.0	4.0	11.0	1.9	0.0	4.0	11.0	1.9	0.0	4.0
819	4.0	11.0	1.9	0.0	4.0	11.0	1.9	0.0	4.0	11.0	1.9	0.0	4.0	11.0	1.9	0.0	6.0	8.0	2.2	4.0	4.0	11.0	1.9	0.0	6.0	8.0	2.2	4.0	6.0	8.0	2.2	4.0	4.0	11.0	1.9	0.0	6.0	8.0	2.2	4.0	4.0	11.0	1.9	0.0	4.0	11.0	1.9	0.0	4.0
820	6.0	8.0	2.2	4.0	4.0	11.0	1.9	0.0	4.0	11.0	1.9	0.0	4.0	11.0	1.9	0.0	4.0	11.0	1.9	0.0	4.0	11.0	1.9	0.0	6.0	8.0	2.2	4.0	4.0	11.0	1.9	0.0	4.0	11.0	1.9	0.0	4.0	11.0	1.9	0.0	6.0	8.0	2.2	4.0	4.0	11.0	1.9	0.0	6.0
821	4.0	11.0	1.9	0.0	4.0	11.0	1.9	0.0	4.0	11.0	1.9	0.0	4.0	11.0	1.9	0.0	4.0	11.0	1.9	0.0	4.0	11.0	1.9	0.0	4.0	11.0	1.9	0.0	6.0	8.0	2.2	4.0	4.0	11.0	1.9	0.0	6.0	8.0	2.2	4.0	4.0	11.0	1.9	0.0	4.0	11.0	1.9	0.0	6.0
822	4.0	11.0	1.9	0.0	4.0	11.0	1.9	0.0	6.0	8.0	2.2	4.0	4.0	11.0	1.9	0.0	4.0	11.0	1.9	0.0	6.0	8.0	2.2	4.0	4.0	11.0	1.9	0.0	4.0	11.0	1.9	0.0	4.0	11.0	1.9	0.0	4.0	11.0	1.9	0.0	4.0	11.0	1.9	0.0	4.0	11.0	1.9	0.0	4.0
823	6.0	8.0	2.2	4.0	6.0	8.0	2.2	4.0	6.0	8.0	2.2	4.0	6.0	8.0	2.2	4.0	4.0	11.0	1.9	0.0	6.0	8.0	2.2	4.0	4.0	11.0	1.9	0.0	4.0	11.0	1.9	0.0	4.0	11.0	1.9	0.0	4.0	11.0	1.9	0.0	6.0	8.0	2.2	4.0	4.0	11.0	1.9	0.0	4.0
824	4.0	11.0	1.9	0.0	4.0	11.0	1.9	0.0	4.0	11.0	1.9	0.0	6.0	8.0	2.2	4.0	6.0	8.0	2.2	4.0	4.0	11.0	1.9	0.0	4.0	11.0	1.9	0.0	6.0	8.0	2.2	4.0	4.0	11.0	1.9	0.0	4.0	11.0	1.9	0.0	4.0	11.0	1.9	0.0	4.0	11.0	1.9	0.0	4.0
825	4.0	11.0	1.9	0.0	4.0	11.0	1.9	0.0	6.0	8.0	2.2	4.0	4.0	11.0	1.9	0.0	4.0	11.0	1.9	0.0	6.0	8.0	2.2	4.0	4.0	11.0	1.9	0.0	4.0	11.0	1.9	0.0	6.0	8.0	2.2	4.0	4.0	11.0	1.9	0.0	4.0	11.0	1.9	0.0	4.0	11.0	1.9	0.0	4.0
826	4.0	11.0	1.9	0.0	4.0	11.0	1.9	0.0	4.0	11.0	1.9	0.0	4.0	11.0	1.9	0.0	4.0	11.0	1.9	0.0	6.0	8.0	2.2	4.0	6.0	8.0	2.2	4.0	4.0	11.0	1.9	0.0	4.0	11.0	1.9	0.0	4.0	11.0	1.9	0.0	4.0	11.0	1.9	0.0	4.0	11.0	1.9	0.0	4.0
827	4.0	11.0	1.9	0.0	4.0	11.0	1.9	0.0	6.0	8.0	2.2	4.0	4.0	11.0	1.9	0.0	4.0	11.0	1.9	0.0	4.0	11.0	1.9	0.0	6.0	8.0	2.2	4.0	4.0	11.0	1.9	0.0	6.0	8.0	2.2	4.0	6.0	8.0	2.2	4.0	6.0	8.0	2.2	4.0	4.0	11.0	1.9	0.0	4.0
828	4.0	11.0	1.9	0.0	6.0	8.0	2.2	4.0	6.0	8.0	2.2	4.0	6.0	8.0	2.2	4.0	6.0	8.0	2.2	4.0	4.0	11.0	1.9	0.0	4.0	11.0	1.9	0.0	4.0	11.0	1.9	0.0	4.0	11.0	1.9	0.0	6.0	8.0	2.2	4.0	4.0	11.0	1.9	0.0	4.0	11.0	1.9	0.0	4.0
829	4.0	11.0	1.9	0.0	4.0	11.0	1.9	0.0	4.0	11.0	1.9	0.0	4.0	11.0	1.9	0.0	4.0	11.0	1.9	0.0	4.0	11.0	1.9	0.0	4.0	11.0	1.9	0.0	4.0	11.0	1.9	0.0	4.0	11.0	1.9	0.0	4.0	11.0	1.9	0.0	6.0	8.0	2.2	4.0	6.0	8.0	2.2	4.0	4.0
830	4.0	11.0	1.9	0.0	6.0	8.0	2.2	4.0	4.0	11.0	1.9	0.0	4.0	11.0	1.9	0.0	6.0	8.0	2.2	4.0	4.0	11.0	1.9	0.0	4.0	11.0	1.9	0.0	4.0	11.0	1.9	0.0	4.0	11.0	1.9	0.0	4.0	11.0	1.9	0.0	4.0	11.0	1.9	0.0	6.0	8.0	2.2	4.0	6.0
831	4.0	11.0	1.9	0.0	4.0	11.0	1.9	0.0	4.0	11.0	1.9	0.0	4.0	11.0	1.9	0.0	6.0	8.0	2.2	4.0	4.0	11.0	1.9	0.0	4.0	11.0	1.9	0.0	4.0	11.0	1.9	0.0	4.0	11.0	1.9	0.0	6.0	8.0	2.2	4.0	6.0	8.0	2.2	4.0	4.0	11.0	1.9	0.0	4.0
832	4.0	11.0	1.9	0.0	6.0	8.0	2.2	4.0	4.0	11.0	1.9	0.0	6.0	8.0	2.2	4.0	4.0	11.0	1.9	0.0	4.0	11.0	1.9	0.0	4.0	11.0	1.9	0.0	4.0	11.0	1.9	0.0	4.0	11.0	1.9	0.0	4.0	11.0	1.9	0.0	4.0	11.0	1.9	0.0	4.0	11.0	1.9	0.0	4.0
833	4.0	11.0	1.9	0.0	6.0	8.0	2.2	4.0	4.0	11.0	1.9	0.0	4.0	11.0	1.9	0.0	4.0	11.0	1.9	0.0	4.0	11.0	1.9	0.0	4.0	11.0	1.9	0.0	4.0	11.0	1.9	0.0	4.0	11.0	1.9	0.0	4.0	11.0	1.9	0.0	6.0	8.0	2.2	4.0	4.0	11.0	1.9	0.0	4.0
834	4.0	11.0	1.9	0.0	6.0	8.0	2.2	4.0	4.0	11.0	1.9	0.0	4.0	11.0	1.9	0.0	4.0	11.0	1.9	0.0	4.0	11.0	1.9	0.0	4.0	11.0	1.9	0.0	4.0	11.0	1.9	0.0	6.0	8.0	2.2	4.0	4.0	11.0	1.9	0.0	4.0	11.0	1.9	0.0	6.0	8.0	2.2	4.0	4.0
835	4.0	11.0	1.9	0.0	4.0	11.0	1.9	0.0	4.0	11.0	1.9	0.0	4.0	11.0	1.9	0.0	6.0	8.0	2.2	4.0	4.0	11.0	1.9	0.0	4.0	11.0	1.9	0.0	4.0	11.0	1.9	0.0	4.0	11.0	1.9	0.0	4.0	11.0	1.9	0.0	6.0	8.0	2.2	4.0	4.0	11.0	1.9	0.0	6.0
836	4.0	11.0	1.9	0.0	4.0	11.0	1.9	0.0	6.0	8.0	2.2	4.0	4.0	11.0	1.9	0.0	4.0	11.0	1.9	0.0	4.0	11.0	1.9	0.0	4.0	11.0	1.9	0.0	6.0	8.0	2.2	4.0	4.0	11.0	1.9	0.0	4.0	11.0	1.9	0.0	6.0	8.0	2.2	4.0	4.0	11.0	1.9	0.0	6.0
837	4.0	11.0	1.9	0.0	6.0	8.0	2.2	4.0	6.0	8.0	2.2	4.0	4.0	11.0	1.9	0.0	4.0	11.0	1.9	0.0	4.0	11.0	1.9	0.0	6.0	8.0	2.2	4.0	4.0	11.0	1.9	0.0	4.0	11.0	1.9	0.0	4.0	11.0	1.9	0.0	4.0	11.0	1.9	0.0	4.0	11.0	1.9	0.0	6.0
838	4.0	11.0	1.9	0.0	4.0	11.0	1.9	0.0	6.0	9.0	2.2	3.0	4.0	11.0	1.9	0.0	4.0	11.0	1.9	0.0	4.0	11.0	1.9	0.0	4.0	11.0	1.9	0.0	4.0	11.0	1.9	0.0	4.0	11.0	1.9	0.0	4.0	11.0	1.9	0.0	4.0	11.0	1.9	0.0	4.0	11.0	1.9	0.0	4.0
839	4.0	11.0	1.9	0.0	6.0	9.0	2.2	3.0	4.0	11.0	1.9	0.0	4.0	11.0	1.9	0.0	6.0	9.0	2.2	3.0	4.0	11.0	1.9	0.0	4.0	11.0	1.9	0.0	4.0	11.0	1.9	0.0	4.0	11.0	1.9	0.0	6.0	9.0	2.2	3.0	4.0	11.0	1.9	0.0	4.0	11.0	1.9	0.0	4.0
840	6.0	9.0	2.2	3.0	4.0	11.0	1.9	0.0	4.0	11.0	1.9	0.0	4.0	11.0	1.9	0.0	4.0	11.0	1.9	0.0	4.0	11.0	1.9	0.0	4.0	11.0	1.9	0.0	4.0	11.0	1.9	0.0	4.0	11.0	1.9	0.0	4.0	11.0	1.9	0.0	4.0	11.0	1.9	0.0	4.0	11.0	1.9	0.0	6.0
841	6.0	9.0	2.2	3.0	4.0	11.0	1.9	0.0	4.0	11.0	1.9	0.0	4.0	11.0	1.9	0.0	6.0	9.0	2.2	3.0	4.0	11.0	1.9	0.0	4.0	11.0	1.9	0.0	6.0	9.0	2.2	3.0	4.0	11.0	1.9	0.0	6.0	9.0	2.2	3.0	6.0	9.0	2.2	3.0	4.0	11.0	1.9	0.0	4.0
842	4.0	11.0	1.9	0.0	6.0	9.0	2.2	3.0	6.0	9.0	2.2	3.0	4.0	11.0	1.9	0.0	4.0	11.0	1.9	0.0	6.0	9.0	2.2	3.0	4.0	11.0	1.9	0.0	4.0	11.0	1.9	0.0	4.0	11.0	1.9	0.0	4.0	11.0	1.9	0.0	4.0	11.0	1.9	0.0	4.0	11.0	1.9	0.0	6.0
843	4.0	11.0	1.9	0.0	4.0	11.0	1.9	0.0	4.0	11.0	1.9	0.0	4.0	11.0	1.9	0.0	4.0	11.0	1.9	0.0	4.0	11.0	1.9	0.0	4.0	11.0	1.9	0.0	4.0	11.0	1.9	0.0	4.0	11.0	1.9	0.0	6.0	9.0	2.2	3.0	4.0	11.0	1.9	0.0	4.0	11.0	1.9	0.0	4.0
844	6.0	9.0	2.2	3.0	4.0	11.0	1.9	0.0	4.0	11.0	1.9	0.0	4.0	11.0	1.9	0.0	6.0	9.0	2.2	3.0	4.0	11.0	1.9	0.0	4.0	11.0	1.9	0.0	6.0	9.0	2.2	3.0	4.0	11.0	1.9	0.0	6.0	9.0	2.2	3.0	4.0	11.0	1.9	0.0	4.0	11.0	1.9	0.0	4.0
845	4.0	11.0	1.9	0.0	6.0	9.0	2.2	3.0	4.0	11.0	1.9	0.0	4.0	11.0	1.9	0.0	4.0	11.0	1.9	0.0	6.0	9.0	2.2	3.0	4.0	11.0	1.9	0.0	4.0	11.0	1.9	0.0	4.0	11.0	1.9	0.0	4.0	11.0	1.9	0.0	6.0	9.0	2.2	3.0	6.0	9.0	2.2	3.0	4.0
846	4.0	11.0	1.9	0.0	4.0	11.0	1.9	0.0	4.0	11.0	1.9	0.0	6.0	9.0	2.2	3.0	4.0	11.0	1.9	0.0	4.0	11.0	1.9	0.0	4.0	11.0	1.9	0.0	4.0	11.0	1.9	0.0	4.0	11.0	1.9	0.0	4.0	11.0	1.9	0.0	4.0	11.0	1.9	0.0	4.0	11.0	1.9	0.0	4.0
847	4.0	11.0	1.9	0.0	6.0	9.0	2.2	3.0	4.0	11.0	1.9	0.0	4.0	11.0	1.9	0.0	4.0	11.0	1.9	0.0	4.0	11.0	1.9	0.0	4.0	11.0	1.9	0.0	4.0	11.0	1.9	0.0	4.0	11.0	1.9	0.0	4.0	11.0	1.9	0.0	4.0	11.0	1.9	0.0	4.0	11.0	1.9	0.0	4.0
848	4.0	11.0	1.9	0.0	6.0	9.0	2.2	3.0	4.0	11.0	1.9	0.0	4.0	11.0	1.9	0.0	4.0	11.0	1.9	0.0	6.0	9.0	2.2	3.0	4.0	11.0	1.9	0.0	4.0	11.0	1.9	0.0	4.0	11.0	1.9	0.0	4.0	11.0	1.9	0.0	4.0	11.0	1.9	0.0	4.0	11.0	1.9	0.0	4.0
849	4.0	11.0	1.9	0.0	4.0	11.0	1.9	0.0	4.0	11.0	1.9	0.0	4.0	11.0	1.9	0.0	6.0	9.0	2.2	3.0	4.0	11.0	1.9	0.0	6.0	9.0	2.2	3.0	4.0	11.0	1.9	0.0	6.0	9.0	2.2	3.0	4.0	11.0	1.9	0.0	6.0	9.0	2.2	3.0	4.0	11.0	1.9	0.0	4.0
850	4.0	11.0	1.9	0.0	6.0	9.0	2.2	3.0	6.0	9.0	2.2	3.0	4.0	11.0	1.9	0.0	4.0	11.0	1.9	0.0	4.0	11.0	1.9	0.0	6.0	9.0	2.2	3.0	4.0	11.0	1.9	0.0	4.0	11.0	1.9	0.0	4.0	11.0	1.9	0.0	4.0	11.0	1.9	0.0	4.0	11.0	1.9	0.0	4.0
851	4.0	11.0	1.9	0.0	4.0	11.0	1.9	0.0	4.0	11.0	1.9	0.0	4.0	11.0	1.9	0.0	4.0	11.0	1.9	0.0	4.0	11.0	1.9	0.0	4.0	11.0	1.9	0.0	4.0	11.0	1.9	0.0	4.0	11.0	1.9	0.0	4.0	11.0	1.9	0.0	6.0	9.0	2.2	3.0	4.0	11.0	1.9	0.0	6.0
852	4.0	11.0	1.9	0.0	4.0	11.0	1.9	0.0	4.0	11.0	1.9	0.0	4.0	11.0	1.9	0.0	6.0	9.0	2.2	3.0	4.0	11.0	1.9	0.0	4.0	11.0	1.9	0.0	6.0	9.0	2.2	3.0	6.0	9.0	2.2	3.0	4.0	11.0	1.9	0.0	6.0	9.0	2.2	3.0	4.0	11.0	1.9	0.0	4.0
853	4.0	11.0	1.9	0.0	6.0	9.0	2.2	3.0	4.0	11.0	1.9	0.0	4.0	11.0	1.9	0.0	4.0	11.0	1.9	0.0	4.0	11.0	1.9	0.0	4.0	11.0	1.9	0.0	6.0	9.0	2.2	3.0	4.0	11.0	1.9	0.0	4.0	11.0	1.9	0.0	6.0	9.0	2.2	3.0	4.0	11.0	1.9	0.0	4.0
854	4.0	11.0	1.9	0.0	4.0	11.0	1.9	0.0	4.0	11.0	1.9	0.0	4.0	11.0	1.9	0.0	4.0	11.0	1.9	0.0	4.0	11.0	1.9	0.0	6.0	9.0	2.2	3.0	4.0	11.0	1.9	0.0	4.0	11.0	1.9	0.0	4.0	11.0	1.9	0.0	4.0	11.0	1.9	0.0	4.0	11.0	1.9	0.0	4.0
855	4.0	11.0	1.9	0.0	4.0	11.0	1.9	0.0	4.0	11.0	1.9	0.0	4.0	11.0	1.9	0.0	4.0	11.0	1.9	0.0	4.0	11.0	1.9	0.0	4.0	11.0	1.9	0.0	4.0	11.0	1.9	0.0	4.0	11.0	1.9	0.0	6.0	9.0	2.2	3.0	4.0	11.0	1.9	0.0	4.0	11.0	1.9	0.0	6.0
856	6.0	9.0	2.2	3.0	4.0	11.0	1.9	0.0	4.0	11.0	1.9	0.0	4.0	11.0	1.9	0.0	4.0	11.0	1.9	0.0	4.0	11.0	1.9	0.0	6.0	9.0	2.2	3.0	4.0	11.0	1.9	0.0	6.0	9.0	2.2	3.0	6.0	9.0	2.2	3.0	4.0	11.0	1.9	0.0	4.0	11.0	1.9	0.0	4.0
857	4.0	11.0	1.9	0.0	4.0	11.0	1.9	0.0	6.0	9.0	2.2	3.0	4.0	11.0	1.9	0.0	4.0	11.0	1.9	0.0	4.0	11.0	1.9	0.0	6.0	9.0	2.2	3.0	6.0	9.0	2.2	3.0	4.0	11.0	1.9	0.0	6.0	9.0	2.2	3.0	4.0	11.0	1.9	0.0	4.0	11.0	1.9	0.0	6.0
858	4.0	11.0	1.9	0.0	6.0	9.0	2.2	3.0	4.0	11.0	1.9	0.0	4.0	11.0	1.9	0.0	6.0	9.0	2.2	3.0	4.0	11.0	1.9	0.0	4.0	11.0	1.9	0.0	4.0	11.0	1.9	0.0	4.0	11.0	1.9	0.0	4.0	11.0	1.9	0.0	4.0	11.0	1.9	0.0	4.0	11.0	1.9	0.0	4.0
859	4.0	11.0	1.9	0.0	4.0	11.0	1.9	0.0	6.0	9.0	2.2	3.0	4.0	11.0	1.9	0.0	4.0	11.0	1.9	0.0	4.0	11.0	1.9	0.0	4.0	11.0	1.9	0.0	4.0	11.0	1.9	0.0	4.0	11.0	1.9	0.0	4.0	11.0	1.9	0.0	6.0	9.0	2.2	3.0	6.0	9.0	2.2	3.0	4.0
860	4.0	11.0	1.9	0.0	4.0	11.0	1.9	0.0	6.0	9.0	2.2	3.0	4.0	11.0	1.9	0.0	4.0	11.0	1.9	0.0	4.0	11.0	1.9	0.0	4.0	11.0	1.9	0.0	4.0	11.0	1.9	0.0	4.0	11.0	1.9	0.0	4.0	11.0	1.9	0.0	4.0	11.0	1.9	0.0	6.0	9.0	2.2	3.0	4.0
861	4.0	11.0	1.9	0.0	6.0	9.0	2.2	3.0	4.0	11.0	1.9	0.0	4.0	11.0	1.9	0.0	4.0	11.0	1.9	0.0	4.0	11.0	1.9	0.0	6.0	9.0	2.2	3.0	4.0	11.0	1.9	0.0	4.0	11.0	1.9	0.0	4.0	11.0	1.9	0.0	4.0	11.0	1.9	0.0	4.0	11.0	1.9	0.0	6.0
862	4.0	11.0	1.9	0.0	4.0	11.0	1.9	0.0	4.0	11.0	1.9	0.0	4.0	11.0	1.9	0.0	4.0	11.0	1.9	0.0	4.0	11.0	1.9	0.0	4.0	11.0	1.9	0.0	4.0	11.0	1.9	0.0	4.0	11.0	1.9	0.0	4.0	11.0	1.9	0.0	6.0	9.0	2.2	3.0	4.0	11.0	1.9	0.0	4.0
863	6.0	9.0	2.2	3.0	4.0	11.0	1.9	0.0	6.0	9.0	2.2	3.0	4.0	11.0	1.9	0.0	4.0	11.0	1.9	0.0	4.0	11.0	1.9	0.0	4.0	11.0	1.9	0.0	4.0	11.0	1.9	0.0	4.0	11.0	1.9	0.0	6.0	9.0	2.2	3.0	4.0	11.0	1.9	0.0	4.0	11.0	1.9	0.0	4.0
864	4.0	11.0	1.9	0.0	4.0	11.0	1.9	0.0	4.0	11.0	1.9	0.0	6.0	9.0	2.2	3.0	4.0	11.0	1.9	0.0	4.0	11.0	1.9	0.0	4.0	11.0	1.9	0.0	4.0	11.0	1.9	0.0	4.0	11.0	1.9	0.0	4.0	11.0	1.9	0.0	6.0	9.0	2.2	3.0	4.0	11.0	1.9	0.0	4.0
865	4.0	11.0	1.9	0.0	4.0	11.0	1.9	0.0	4.0	11.0	1.9	0.0	4.0	11.0	1.9	0.0	4.0	11.0	1.9	0.0	4.0	11.0	1.9	0.0	4.0	11.0	1.9	0.0	4.0	11.0	1.9	0.0	6.0	9.0	2.2	3.0	4.0	11.0	1.9	0.0	4.0	11.0	1.9	0.0	4.0	11.0	1.9	0.0	4.0
866	6.0	9.0	2.2	3.0	4.0	11.0	1.9	0.0	4.0	11.0	1.9	0.0	4.0	11.0	1.9	0.0	6.0	9.0	2.2	3.0	4.0	11.0	1.9	0.0	6.0	9.0	2.2	3.0	4.0	11.0	1.9	0.0	4.0	11.0	1.9	0.0	4.0	11.0	1.9	0.0	6.0	9.0	2.2	3.0	6.0	9.0	2.2	3.0	6.0
867	6.0	9.0	2.2	3.0	4.0	11.0	1.9	0.0	4.0	11.0	1.9	0.0	4.0	11.0	1.9	0.0	6.0	9.0	2.2	3.0	4.0	11.0	1.9	0.0	4.0	11.0	1.9	0.0	4.0	11.0	1.9	0.0	4.0	11.0	1.9	0.0	6.0	9.0	2.2	3.0	4.0	11.0	1.9	0.0	6.0	9.0	2.2	3.0	6.0
868	4.0	11.0	1.9	0.0	4.0	11.0	1.9	0.0	4.0	11.0	1.9	0.0	4.0	11.0	1.9	0.0	6.0	9.0	2.2	3.0	4.0	11.0	1.9	0.0	4.0	11.0	1.9	0.0	4.0	11.0	1.9	0.0	4.0	11.0	1.9	0.0	4.0	11.0	1.9	0.0	4.0	11.0	1.9	0.0	4.0	11.0	1.9	0.0	4.0
869	6.0	9.0	2.2	3.0	4.0	11.0	1.9	0.0	4.0	11.0	1.9	0.0	4.0	11.0	1.9	0.0	6.0	9.0	2.2	3.0	4.0	11.0	1.9	0.0	4.0	11.0	1.9	0.0	4.0	11.0	1.9	0.0	4.0	11.0	1.9	0.0	4.0	11.0	1.9	0.0	4.0	11.0	1.9	0.0	4.0	11.0	1.9	0.0	6.0
870	4.0	11.0	1.9	0.0	6.0	9.0	2.2	3.0	6.0	9.0	2.2	3.0	6.0	9.0	2.2	3.0	6.0	9.0	2.2	3.0	4.0	11.0	1.9	0.0	4.0	11.0	1.9	0.0	4.0	11.0	1.9	0.0	4.0	11.0	1.9	0.0	4.0	11.0	1.9	0.0	4.0	11.0	1.9	0.0	6.0	9.0	2.2	3.0	4.0
871	4.0	11.0	1.9	0.0	4.0	11.0	1.9	0.0	4.0	11.0	1.9	0.0	4.0	11.0	1.9	0.0	4.0	11.0	1.9	0.0	4.0	11.0	1.9	0.0	4.0	11.0	1.9	0.0	6.0	9.0	2.2	3.0	4.0	11.0	1.9	0.0	4.0	11.0	1.9	0.0	4.0	11.0	1.9	0.0	4.0	11.0	1.9	0.0	4.0
872	4.0	11.0	1.9	0.0	4.0	11.0	1.9	0.0	4.0	11.0	1.9	0.0	4.0	11.0	1.9	0.0	6.0	9.0	2.2	3.0	6.0	9.0	2.2	3.0	6.0	9.0	2.2	3.0	4.0	11.0	1.9	0.0	4.0	11.0	1.9	0.0	4.0	11.0	1.9	0.0	4.0	11.0	1.9	0.0	6.0	9.0	2.2	3.0	4.0
873	4.0	11.0	1.9	0.0	4.0	11.0	1.9	0.0	4.0	11.0	1.9	0.0	4.0	11.0	1.9	0.0	6.0	9.0	2.2	3.0	4.0	11.0	1.9	0.0	6.0	9.0	2.2	3.0	4.0	11.0	1.9	0.0	4.0	11.0	1.9	0.0	4.0	11.0	1.9	0.0	4.0	11.0	1.9	0.0	4.0	11.0	1.9	0.0	4.0
874	4.0	11.0	1.9	0.0	4.0	11.0	1.9	0.0	4.0	11.0	1.9	0.0	4.0	11.0	1.9	0.0	4.0	11.0	1.9	0.0	4.0	11.0	1.9	0.0	4.0	11.0	1.9	0.0	4.0	11.0	1.9	0.0	4.0	11.0	1.9	0.0	6.0	9.0	2.2	3.0	6.0	9.0	2.2	3.0	6.0	9.0	2.2	3.0	4.0
875	4.0	11.0	1.9	0.0	4.0	11.0	1.9	0.0	4.0	11.0	1.9	0.0	4.0	11.0	1.9	0.0	4.0	11.0	1.9	0.0	4.0	11.0	1.9	0.0	4.0	11.0	1.9	0.0	4.0	11.0	1.9	0.0	6.0	9.0	2.2	3.0	6.0	9.0	2.2	3.0	4.0	11.0	1.9	0.0	4.0	11.0	1.9	0.0	6.0
876	6.0	9.0	2.2	3.0	4.0	11.0	1.9	0.0	4.0	11.0	1.9	0.0	4.0	11.0	1.9	0.0	4.0	11.0	1.9	0.0	6.0	9.0	2.2	3.0	4.0	11.0	1.9	0.0	6.0	9.0	2.2	3.0	6.0	9.0	2.2	3.0	4.0	11.0	1.9	0.0	4.0	11.0	1.9	0.0	4.0	11.0	1.9	0.0	4.0
877	4.0	11.0	1.9	0.0	4.0	11.0	1.9	0.0	4.0	11.0	1.9	0.0	6.0	9.0	2.2	3.0	6.0	9.0	2.2	3.0	4.0	11.0	1.9	0.0	4.0	11.0	1.9	0.0	4.0	11.0	1.9	0.0	4.0	11.0	1.9	0.0	4.0	11.0	1.9	0.0	4.0	11.0	1.9	0.0	4.0	11.0	1.9	0.0	4.0
878	4.0	11.0	1.9	0.0	4.0	11.0	1.9	0.0	4.0	11.0	1.9	0.0	4.0	11.0	1.9	0.0	4.0	11.0	1.9	0.0	4.0	11.0	1.9	0.0	6.0	9.0	2.2	3.0	4.0	11.0	1.9	0.0	4.0	11.0	1.9	0.0	4.0	11.0	1.9	0.0	6.0	9.0	2.2	3.0	4.0	11.0	1.9	0.0	6.0
879	4.0	11.0	1.9	0.0	4.0	11.0	1.9	0.0	4.0	11.0	1.9	0.0	4.0	11.0	1.9	0.0	6.0	9.0	2.2	3.0	4.0	11.0	1.9	0.0	6.0	9.0	2.2	3.0	4.0	11.0	1.9	0.0	6.0	9.0	2.2	3.0	4.0	11.0	1.9	0.0	4.0	11.0	1.9	0.0	4.0	11.0	1.9	0.0	4.0
880	4.0	11.0	1.9	0.0	4.0	11.0	1.9	0.0	4.0	11.0	1.9	0.0	4.0	11.0	1.9	0.0	6.0	9.0	2.2	3.0	6.0	9.0	2.2	3.0	4.0	11.0	1.9	0.0	4.0	11.0	1.9	0.0	4.0	11.0	1.9	0.0	4.0	11.0	1.9	0.0	4.0	11.0	1.9	0.0	4.0	11.0	1.9	0.0	4.0
881	6.0	9.0	2.2	3.0	4.0	11.0	1.9	0.0	4.0	11.0	1.9	0.0	6.0	9.0	2.2	3.0	4.0	11.0	1.9	0.0	4.0	11.0	1.9	0.0	6.0	9.0	2.2	3.0	4.0	11.0	1.9	0.0	4.0	11.0	1.9	0.0	4.0	11.0	1.9	0.0	4.0	11.0	1.9	0.0	6.0	9.0	2.2	3.0	4.0
882	6.0	9.0	2.2	3.0	4.0	11.0	1.9	0.0	4.0	11.0	1.9	0.0	4.0	11.0	1.9	0.0	4.0	11.0	1.9	0.0	4.0	11.0	1.9	0.0	4.0	11.0	1.9	0.0	4.0	11.0	1.9	0.0	4.0	11.0	1.9	0.0	4.0	11.0	1.9	0.0	4.0	11.0	1.9	0.0	4.0	11.0	1.9	0.0	4.0
883	6.0	9.0	2.2	3.0	6.0	9.0	2.2	3.0	4.0	11.0	1.9	0.0	4.0	11.0	1.9	0.0	4.0	11.0	1.9	0.0	4.0	11.0	1.9	0.0	4.0	11.0	1.9	0.0	6.0	9.0	2.2	3.0	4.0	11.0	1.9	0.0	4.0	11.0	1.9	0.0	4.0	11.0	1.9	0.0	4.0	11.0	1.9	0.0	4.0
884	4.0	11.0	1.9	0.0	6.0	9.0	2.2	3.0	4.0	11.0	1.9	0.0	4.0	11.0	1.9	0.0	4.0	11.0	1.9	0.0	4.0	11.0	1.9	0.0	4.0	11.0	1.9	0.0	4.0	11.0	1.9	0.0	4.0	11.0	1.9	0.0	4.0	11.0	1.9	0.0	4.0	11.0	1.9	0.0	6.0	9.0	2.2	3.0	4.0
885	4.0	11.0	1.9	0.0	6.0	9.0	2.2	3.0	4.0	11.0	1.9	0.0	4.0	11.0	1.9	0.0	6.0	9.0	2.2	3.0	4.0	11.0	1.9	0.0	4.0	11.0	1.9	0.0	4.0	11.0	1.9	0.0	4.0	11.0	1.9	0.0	4.0	11.0	1.9	0.0	6.0	9.0	2.2	3.0	4.0	11.0	1.9	0.0	4.0
886	6.0	9.0	2.2	3.0	6.0	9.0	2.2	3.0	4.0	11.0	1.9	0.0	4.0	11.0	1.9	0.0	4.0	11.0	1.9	0.0	4.0	11.0	1.9	0.0	4.0	11.0	1.9	0.0	4.0	11.0	1.9	0.0	4.0	11.0	1.9	0.0	4.0	11.0	1.9	0.0	4.0	11.0	1.9	0.0	6.0	9.0	2.2	3.0	6.0
887	4.0	11.0	1.9	0.0	4.0	11.0	1.9	0.0	4.0	11.0	1.9	0.0	4.0	11.0	1.9	0.0	4.0	11.0	1.9	0.0	4.0	11.0	1.9	0.0	6.0	9.0	2.2	3.0	4.0	11.0	1.9	0.0	4.0	11.0	1.9	0.0	4.0	11.0	1.9	0.0	4.0	11.0	1.9	0.0	6.0	9.0	2.2	3.0	6.0
888	6.0	9.0	2.2	3.0	4.0	11.0	1.9	0.0	4.0	11.0	1.9	0.0	6.0	9.0	2.2	3.0	4.0	11.0	1.9	0.0	4.0	11.0	1.9	0.0	4.0	11.0	1.9	0.0	4.0	11.0	1.9	0.0	4.0	11.0	1.9	0.0	6.0	9.0	2.2	3.0	4.0	11.0	1.9	0.0	4.0	11.0	1.9	0.0	4.0
889	4.0	11.0	1.9	0.0	4.0	11.0	1.9	0.0	6.0	9.0	2.2	3.0	4.0	11.0	1.9	0.0	4.0	11.0	1.9	0.0	4.0	11.0	1.9	0.0	6.0	9.0	2.2	3.0	4.0	11.0	1.9	0.0	4.0	11.0	1.9	0.0	4.0	11.0	1.9	0.0	4.0	11.0	1.9	0.0	4.0	11.0	1.9	0.0	4.0
890	4.0	11.0	1.9	0.0	6.0	9.0	2.2	3.0	4.0	11.0	1.9	0.0	4.0	11.0	1.9	0.0	6.0	9.0	2.2	3.0	6.0	9.0	2.2	3.0	4.0	11.0	1.9	0.0	4.0	11.0	1.9	0.0	4.0	11.0	1.9	0.0	4.0	11.0	1.9	0.0	6.0	9.0	2.2	3.0	4.0	11.0	1.9	0.0	6.0
891	4.0	11.0	1.9	0.0	4.0	11.0	1.9	0.0	6.0	9.0	2.2	3.0	6.0	9.0	2.2	3.0	4.0	11.0	1.9	0.0	6.0	9.0	2.2	3.0	4.0	11.0	1.9	0.0	4.0	11.0	1.9	0.0	4.0	11.0	1.9	0.0	4.0	11.0	1.9	0.0	4.0	11.0	1.9	0.0	4.0	11.0	1.9	0.0	4.0
892	4.0	11.0	1.9	0.0	6.0	9.0	2.2	3.0	6.0	9.0	2.2	3.0	6.0	9.0	2.2	3.0	6.0	9.0	2.2	3.0	4.0	11.0	1.9	0.0	4.0	11.0	1.9	0.0	6.0	9.0	2.2	3.0	4.0	11.0	1.9	0.0	4.0	11.0	1.9	0.0	4.0	11.0	1.9	0.0	4.0	11.0	1.9	0.0	4.0
893	4.0	11.0	1.9	0.0	4.0	11.0	1.9	0.0	4.0	11.0	1.9	0.0	6.0	9.0	2.2	3.0	4.0	11.0	1.9	0.0	4.0	11.0	1.9	0.0	6.0	9.0	2.2	3.0	4.0	11.0	1.9	0.0	6.0	9.0	2.2	3.0	4.0	11.0	1.9	0.0	4.0	11.0	1.9	0.0	4.0	11.0	1.9	0.0	4.0
894	4.0	11.0	1.9	0.0	4.0	11.0	1.9	0.0	4.0	11.0	1.9	0.0	4.0	11.0	1.9	0.0	4.0	11.0	1.9	0.0	4.0	11.0	1.9	0.0	6.0	9.0	2.2	3.0	6.0	9.0	2.2	3.0	4.0	11.0	1.9	0.0	6.0	9.0	2.2	3.0	4.0	11.0	1.9	0.0	4.0	11.0	1.9	0.0	4.0
895	4.0	11.0	1.9	0.0	4.0	11.0	1.9	0.0	4.0	11.0	1.9	0.0	4.0	11.0	1.9	0.0	4.0	11.0	1.9	0.0	4.0	11.0	1.9	0.0	4.0	11.0	1.9	0.0	4.0	11.0	1.9	0.0	4.0	11.0	1.9	0.0	4.0	11.0	1.9	0.0	4.0	11.0	1.9	0.0	6.0	9.0	2.2	3.0	4.0
896	6.0	9.0	2.2	3.0	4.0	11.0	1.9	0.0	4.0	11.0	1.9	0.0	4.0	11.0	1.9	0.0	6.0	9.0	2.2	3.0	4.0	11.0	1.9	0.0	4.0	11.0	1.9	0.0	4.0	11.0	1.9	0.0	6.0	9.0	2.2	3.0	4.0	11.0	1.9	0.0	4.0	11.0	1.9	0.0	4.0	11.0	1.9	0.0	4.0
897	4.0	11.0	1.9	0.0	6.0	9.0	2.2	3.0	4.0	11.0	1.9	0.0	4.0	11.0	1.9	0.0	4.0	11.0	1.9	0.0	4.0	11.0	1.9	0.0	6.0	9.0	2.2	3.0	4.0	11.0	1.9	0.0	4.0	11.0	1.9	0.0	4.0	11.0	1.9	0.0	6.0	9.0	2.2	3.0	4.0	11.0	1.9	0.0	4.0
898	4.0	11.0	1.9	0.0	4.0	11.0	1.9	0.0	4.0	11.0	1.9	0.0	6.0	9.0	2.2	3.0	4.0	11.0	1.9	0.0	6.0	9.0	2.2	3.0	4.0	11.0	1.9	0.0	4.0	11.0	1.9	0.0	4.0	11.0	1.9	0.0	6.0	9.0	2.2	3.0	4.0	11.0	1.9	0.0	6.0	9.0	2.2	3.0	4.0
899	6.0	9.0	2.2	3.0	4.0	11.0	1.9	0.0	6.0	9.0	2.2	3.0	6.0	9.0	2.2	3.0	4.0	11.0	1.9	0.0	6.0	9.0	2.2	3.0	4.0	11.0	1.9	0.0	4.0	11.0	1.9	0.0	4.0	11.0	1.9	0.0	4.0	11.0	1.9	0.0	6.0	9.0	2.2	3.0	4.0	11.0	1.9	0.0	4.0
900	4.0	11.0	1.9	0.0	6.0	9.0	2.2	3.0	4.0	11.0	1.9	0.0	4.0	11.0	1.9	0.0	4.0	11.0	1.9	0.0	6.0	9.0	2.2	3.0	6.0	9.0	2.2	3.0	4.0	11.0	1.9	0.0	4.0	11.0	1.9	0.0	4.0	11.0	1.9	0.0	4.0	11.0	1.9	0.0	4.0	11.0	1.9	0.0	4.0
901	4.0	11.0	1.9	0.0	4.0	11.0	1.9	0.0	4.0	11.0	1.9	0.0	4.0	11.0	1.9	0.0	6.0	9.0	2.2	3.0	4.0	11.0	1.9	0.0	4.0	11.0	1.9	0.0	6.0	9.0	2.2	3.0	4.0	11.0	1.9	0.0	4.0	11.0	1.9	0.0	4.0	11.0	1.9	0.0	4.0	11.0	1.9	0.0	4.0
902	6.0	9.0	2.2	3.0	4.0	11.0	1.9	0.0	4.0	11.0	1.9	0.0	4.0	11.0	1.9	0.0	4.0	11.0	1.9	0.0	6.0	9.0	2.2	3.0	4.0	11.0	1.9	0.0	4.0	11.0	1.9	0.0	4.0	11.0	1.9	0.0	6.0	9.0	2.2	3.0	4.0	11.0	1.9	0.0	4.0	11.0	1.9	0.0	4.0
903	4.0	11.0	1.9	0.0	4.0	11.0	1.9	0.0	4.0	11.0	1.9	0.0	4.0	11.0	1.9	0.0	4.0	11.0	1.9	0.0	6.0	9.0	2.2	3.0	4.0	11.0	1.9	0.0	4.0	11.0	1.9	0.0	4.0	11.0	1.9	0.0	4.0	11.0	1.9	0.0	4.0	11.0	1.9	0.0	4.0	11.0	1.9	0.0	4.0
904	4.0	11.0	1.9	0.0	4.0	11.0	1.9	0.0	6.0	9.0	2.2	3.0	6.0	9.0	2.2	3.0	4.0	11.0	1.9	0.0	4.0	11.0	1.9	0.0	4.0	11.0	1.9	0.0	4.0	11.0	1.9	0.0	4.0	11.0	1.9	0.0	4.0	11.0	1.9	0.0	4.0	11.0	1.9	0.0	4.0	11.0	1.9	0.0	4.0
905	4.0	11.0	1.9	0.0	6.0	9.0	2.2	3.0	4.0	11.0	1.9	0.0	6.0	9.0	2.2	3.0	4.0	11.0	1.9	0.0	4.0	11.0	1.9	0.0	6.0	9.0	2.2	3.0	6.0	9.0	2.2	3.0	4.0	11.0	1.9	0.0	4.0	11.0	1.9	0.0	4.0	11.0	1.9	0.0	6.0	9.0	2.2	3.0	4.0
906	4.0	11.0	1.9	0.0	4.0	11.0	1.9	0.0	6.0	9.0	2.2	3.0	4.0	11.0	1.9	0.0	4.0	11.0	1.9	0.0	4.0	11.0	1.9	0.0	6.0	9.0	2.2	3.0	4.0	11.0	1.9	0.0	4.0	11.0	1.9	0.0	4.0	11.0	1.9	0.0	4.0	11.0	1.9	0.0	4.0	11.0	1.9	0.0	6.0
907	4.0	11.0	1.9	0.0	4.0	11.0	1.9	0.0	4.0	11.0	1.9	0.0	4.0	11.0	1.9	0.0	6.0	9.0	2.2	3.0	4.0	11.0	1.9	0.0	6.0	9.0	2.2	3.0	4.0	11.0	1.9	0.0	4.0	11.0	1.9	0.0	4.0	11.0	1.9	0.0	4.0	11.0	1.9	0.0	4.0	11.0	1.9	0.0	6.0
908	4.0	11.0	1.9	0.0	4.0	11.0	1.9	0.0	4.0	11.0	1.9	0.0	4.0	11.0	1.9	0.0	6.0	9.0	2.2	3.0	4.0	11.0	1.9	0.0	6.0	9.0	2.2	3.0	4.0	11.0	1.9	0.0	4.0	11.0	1.9	0.0	6.0	9.0	2.2	3.0	4.0	11.0	1.9	0.0	6.0	9.0	2.2	3.0	4.0
909	4.0	11.0	1.9	0.0	4.0	11.0	1.9	0.0	4.0	11.0	1.9	0.0	4.0	11.0	1.9	0.0	4.0	11.0	1.9	0.0	4.0	11.0	1.9	0.0	4.0	11.0	1.9	0.0	4.0	11.0	1.9	0.0	4.0	11.0	1.9	0.0	6.0	9.0	2.2	3.0	6.0	9.0	2.2	3.0	4.0	11.0	1.9	0.0	4.0
910	6.0	9.0	2.2	3.0	4.0	11.0	1.9	0.0	4.0	11.0	1.9	0.0	4.0	11.0	1.9	0.0	4.0	11.0	1.9	0.0	6.0	9.0	2.2	3.0	4.0	11.0	1.9	0.0	6.0	9.0	2.2	3.0	4.0	11.0	1.9	0.0	6.0	9.0	2.2	3.0	6.0	9.0	2.2	3.0	6.0	9.0	2.2	3.0	4.0
911	4.0	11.0	1.9	0.0	6.0	9.0	2.2	3.0	4.0	11.0	1.9	0.0	4.0	11.0	1.9	0.0	6.0	9.0	2.2	3.0	4.0	11.0	1.9	0.0	6.0	9.0	2.2	3.0	6.0	9.0	2.2	3.0	4.0	11.0	1.9	0.0	4.0	11.0	1.9	0.0	4.0	11.0	1.9	0.0	6.0	9.0	2.2	3.0	4.0
912	4.0	11.0	1.9	0.0	6.0	9.0	2.2	3.0	6.0	9.0	2.2	3.0	4.0	11.0	1.9	0.0	4.0	11.0	1.9	0.0	6.0	9.0	2.2	3.0	4.0	11.0	1.9	0.0	6.0	9.0	2.2	3.0	4.0	11.0	1.9	0.0	4.0	11.0	1.9	0.0	6.0	9.0	2.2	3.0	6.0	9.0	2.2	3.0	4.0
913	6.0	9.0	2.2	3.0	4.0	11.0	1.9	0.0	6.0	9.0	2.2	3.0	4.0	11.0	1.9	0.0	4.0	11.0	1.9	0.0	4.0	11.0	1.9	0.0	4.0	11.0	1.9	0.0	4.0	11.0	1.9	0.0	6.0	9.0	2.2	3.0	4.0	11.0	1.9	0.0	4.0	11.0	1.9	0.0	4.0	11.0	1.9	0.0	4.0
914	6.0	9.0	2.2	3.0	4.0	11.0	1.9	0.0	4.0	11.0	1.9	0.0	6.0	9.0	2.2	3.0	4.0	11.0	1.9	0.0	6.0	9.0	2.2	3.0	4.0	11.0	1.9	0.0	4.0	11.0	1.9	0.0	4.0	11.0	1.9	0.0	4.0	11.0	1.9	0.0	4.0	11.0	1.9	0.0	4.0	11.0	1.9	0.0	4.0
915	4.0	11.0	1.9	0.0	4.0	11.0	1.9	0.0	6.0	9.0	2.2	3.0	4.0	11.0	1.9	0.0	4.0	11.0	1.9	0.0	4.0	11.0	1.9	0.0	4.0	11.0	1.9	0.0	4.0	11.0	1.9	0.0	4.0	11.0	1.9	0.0	6.0	9.0	2.2	3.0	6.0	9.0	2.2	3.0	4.0	11.0	1.9	0.0	4.0
916	4.0	11.0	1.9	0.0	4.0	11.0	1.9	0.0	4.0	11.0	1.9	0.0	4.0	11.0	1.9	0.0	4.0	11.0	1.9	0.0	4.0	11.0	1.9	0.0	6.0	9.0	2.2	3.0	4.0	11.0	1.9	0.0	6.0	9.0	2.2	3.0	4.0	11.0	1.9	0.0	4.0	11.0	1.9	0.0	4.0	11.0	1.9	0.0	6.0
917	4.0	11.0	1.9	0.0	4.0	11.0	1.9	0.0	4.0	11.0	1.9	0.0	4.0	11.0	1.9	0.0	4.0	11.0	1.9	0.0	4.0	11.0	1.9	0.0	6.0	9.0	2.2	3.0	4.0	11.0	1.9	0.0	4.0	11.0	1.9	0.0	6.0	9.0	2.2	3.0	4.0	11.0	1.9	0.0	6.0	9.0	2.2	3.0	4.0
918	4.0	11.0	1.9	0.0	4.0	11.0	1.9	0.0	6.0	9.0	2.2	3.0	4.0	11.0	1.9	0.0	6.0	9.0	2.2	3.0	4.0	11.0	1.9	0.0	4.0	11.0	1.9	0.0	4.0	11.0	1.9	0.0	6.0	9.0	2.2	3.0	4.0	11.0	1.9	0.0	4.0	11.0	1.9	0.0	4.0	11.0	1.9	0.0	4.0
919	4.0	11.0	1.9	0.0	4.0	11.0	1.9	0.0	4.0	11.0	1.9	0.0	6.0	9.0	2.2	3.0	4.0	11.0	1.9	0.0	4.0	11.0	1.9	0.0	6.0	9.0	2.2	3.0	4.0	11.0	1.9	0.0	4.0	11.0	1.9	0.0	4.0	11.0	1.9	0.0	4.0	11.0	1.9	0.0	6.0	9.0	2.2	3.0	6.0
920	4.0	11.0	1.9	0.0	4.0	11.0	1.9	0.0	6.0	9.0	2.2	3.0	4.0	11.0	1.9	0.0	6.0	9.0	2.2	3.0	4.0	11.0	1.9	0.0	4.0	11.0	1.9	0.0	4.0	11.0	1.9	0.0	4.0	11.0	1.9	0.0	4.0	11.0	1.9	0.0	4.0	11.0	1.9	0.0	4.0	11.0	1.9	0.0	6.0
921	4.0	11.0	1.9	0.0	4.0	11.0	1.9	0.0	4.0	11.0	1.9	0.0	6.0	9.0	2.2	3.0	4.0	11.0	1.9	0.0	4.0	11.0	1.9	0.0	6.0	9.0	2.2	3.0	6.0	9.0	2.2	3.0	4.0	11.0	1.9	0.0	4.0	11.0	1.9	0.0	4.0	11.0	1.9	0.0	4.0	11.0	1.9	0.0	4.0
922	4.0	11.0	1.9	0.0	6.0	9.0	2.2	3.0	4.0	11.0	1.9	0.0	4.0	11.0	1.9	0.0	4.0	11.0	1.9	0.0	4.0	11.0	1.9	0.0	4.0	11.0	1.9	0.0	4.0	11.0	1.9	0.0	6.0	9.0	2.2	3.0	4.0	11.0	1.9	0.0	4.0	11.0	1.9	0.0	4.0	11.0	1.9	0.0	4.0
923	4.0	11.0	1.9	0.0	4.0	11.0	1.9	0.0	4.0	11.0	1.9	0.0	4.0	11.0	1.9	0.0	4.0	11.0	1.9	0.0	4.0	11.0	1.9	0.0	4.0	11.0	1.9	0.0	6.0	9.0	2.2	3.0	6.0	9.0	2.2	3.0	4.0	11.0	1.9	0.0	4.0	11.0	1.9	0.0	4.0	11.0	1.9	0.0	6.0
924	4.0	11.0	1.9	0.0	4.0	11.0	1.9	0.0	6.0	9.0	2.2	3.0	6.0	9.0	2.2	3.0	4.0	11.0	1.9	0.0	4.0	11.0	1.9	0.0	4.0	11.0	1.9	0.0	4.0	11.0	1.9	0.0	6.0	9.0	2.2	3.0	4.0	11.0	1.9	0.0	6.0	9.0	2.2	3.0	4.0	11.0	1.9	0.0	6.0
925	4.0	11.0	1.9	0.0	6.0	9.0	2.2	3.0	4.0	11.0	1.9	0.0	6.0	9.0	2.2	3.0	4.0	11.0	1.9	0.0	6.0	9.0	2.2	3.0	6.0	9.0	2.2	3.0	4.0	11.0	1.9	0.0	4.0	11.0	1.9	0.0	4.0	11.0	1.9	0.0	4.0	11.0	1.9	0.0	4.0	11.0	1.9	0.0	4.0
926	6.0	9.0	2.2	3.0	4.0	11.0	1.9	0.0	4.0	11.0	1.9	0.0	6.0	9.0	2.2	3.0	6.0	9.0	2.2	3.0	4.0	11.0	1.9	0.0	4.0	11.0	1.9	0.0	4.0	11.0	1.9	0.0	4.0	11.0	1.9	0.0	4.0	11.0	1.9	0.0	4.0	11.0	1.9	0.0	4.0	11.0	1.9	0.0	4.0
927	4.0	11.0	1.9	0.0	4.0	11.0	1.9	0.0	4.0	11.0	1.9	0.0	4.0	11.0	1.9	0.0	4.0	11.0	1.9	0.0	4.0	11.0	1.9	0.0	4.0	11.0	1.9	0.0	4.0	11.0	1.9	0.0	4.0	11.0	1.9	0.0	4.0	11.0	1.9	0.0	4.0	11.0	1.9	0.0	4.0	11.0	1.9	0.0	6.0
928	4.0	11.0	1.9	0.0	4.0	11.0	1.9	0.0	4.0	11.0	1.9	0.0	4.0	11.0	1.9	0.0	6.0	9.0	2.2	3.0	4.0	11.0	1.9	0.0	4.0	11.0	1.9	0.0	4.0	11.0	1.9	0.0	6.0	9.0	2.2	3.0	6.0	9.0	2.2	3.0	4.0	11.0	1.9	0.0	6.0	9.0	2.2	3.0	4.0
929	6.0	9.0	2.2	3.0	4.0	11.0	1.9	0.0	6.0	9.0	2.2	3.0	4.0	11.0	1.9	0.0	6.0	9.0	2.2	3.0	6.0	9.0	2.2	3.0	6.0	9.0	2.2	3.0	4.0	11.0	1.9	0.0	4.0	11.0	1.9	0.0	4.0	11.0	1.9	0.0	4.0	11.0	1.9	0.0	4.0	11.0	1.9	0.0	4.0
930	6.0	9.0	2.2	3.0	4.0	11.0	1.9	0.0	4.0	11.0	1.9	0.0	4.0	11.0	1.9	0.0	4.0	11.0	1.9	0.0	4.0	11.0	1.9	0.0	4.0	11.0	1.9	0.0	4.0	11.0	1.9	0.0	6.0	9.0	2.2	3.0	6.0	9.0	2.2	3.0	4.0	11.0	1.9	0.0	4.0	11.0	1.9	0.0	4.0
931	4.0	11.0	1.9	0.0	4.0	11.0	1.9	0.0	6.0	9.0	2.2	3.0	6.0	9.0	2.2	3.0	4.0	11.0	1.9	0.0	4.0	11.0	1.9	0.0	4.0	11.0	1.9	0.0	4.0	11.0	1.9	0.0	6.0	9.0	2.2	3.0	4.0	11.0	1.9	0.0	6.0	9.0	2.2	3.0	4.0	11.0	1.9	0.0	4.0
932	4.0	11.0	1.9	0.0	6.0	9.0	2.2	3.0	4.0	11.0	1.9	0.0	4.0	11.0	1.9	0.0	6.0	9.0	2.2	3.0	4.0	11.0	1.9	0.0	6.0	9.0	2.2	3.0	4.0	11.0	1.9	0.0	4.0	11.0	1.9	0.0	4.0	11.0	1.9	0.0	4.0	11.0	1.9	0.0	4.0	11.0	1.9	0.0	4.0
933	6.0	9.0	2.2	3.0	4.0	11.0	1.9	0.0	4.0	11.0	1.9	0.0	4.0	11.0	1.9	0.0	4.0	11.0	1.9	0.0	4.0	11.0	1.9	0.0	4.0	11.0	1.9	0.0	4.0	11.0	1.9	0.0	4.0	11.0	1.9	0.0	6.0	9.0	2.2	3.0	4.0	11.0	1.9	0.0	4.0	11.0	1.9	0.0	4.0
934	4.0	11.0	1.9	0.0	4.0	11.0	1.9	0.0	6.0	9.0	2.2	3.0	4.0	11.0	1.9	0.0	4.0	11.0	1.9	0.0	4.0	11.0	1.9	0.0	6.0	9.0	2.2	3.0	6.0	9.0	2.2	3.0	4.0	11.0	1.9	0.0	6.0	9.0	2.2	3.0	4.0	11.0	1.9	0.0	6.0	9.0	2.2	3.0	4.0
935	4.0	11.0	1.9	0.0	6.0	9.0	2.2	3.0	4.0	11.0	1.9	0.0	6.0	9.0	2.2	3.0	4.0	11.0	1.9	0.0	6.0	9.0	2.2	3.0	4.0	11.0	1.9	0.0	4.0	11.0	1.9	0.0	6.0	9.0	2.2	3.0	4.0	11.0	1.9	0.0	4.0	11.0	1.9	0.0	4.0	11.0	1.9	0.0	4.0
936	6.0	9.0	2.2	3.0	6.0	9.0	2.2	3.0	4.0	11.0	1.9	0.0	4.0	11.0	1.9	0.0	4.0	11.0	1.9	0.0	4.0	11.0	1.9	0.0	4.0	11.0	1.9	0.0	6.0	9.0	2.2	3.0	6.0	9.0	2.2	3.0	4.0	11.0	1.9	0.0	4.0	11.0	1.9	0.0	6.0	9.0	2.2	3.0	4.0
937	4.0	11.0	1.9	0.0	4.0	11.0	1.9	0.0	4.0	11.0	1.9	0.0	6.0	9.0	2.2	3.0	4.0	11.0	1.9	0.0	4.0	11.0	1.9	0.0	4.0	11.0	1.9	0.0	4.0	11.0	1.9	0.0	4.0	11.0	1.9	0.0	4.0	11.0	1.9	0.0	4.0	11.0	1.9	0.0	4.0	11.0	1.9	0.0	6.0
938	4.0	11.0	1.9	0.0	4.0	11.0	1.9	0.0	6.0	9.0	2.2	3.0	6.0	9.0	2.2	3.0	4.0	11.0	1.9	0.0	4.0	11.0	1.9	0.0	4.0	11.0	1.9	0.0	4.0	11.0	1.9	0.0	4.0	11.0	1.9	0.0	4.0	11.0	1.9	0.0	4.0	11.0	1.9	0.0	4.0	11.0	1.9	0.0	6.0
939	4.0	11.0	1.9	0.0	4.0	11.0	1.9	0.0	4.0	11.0	1.9	0.0	4.0	11.0	1.9	0.0	4.0	11.0	1.9	0.0	4.0	11.0	1.9	0.0	6.0	9.0	2.2	3.0	4.0	11.0	1.9	0.0	4.0	11.0	1.9	0.0	6.0	9.0	2.2	3.0	6.0	9.0	2.2	3.0	4.0	11.0	1.9	0.0	4.0
940	4.0	11.0	1.9	0.0	4.0	11.0	1.9	0.0	6.0	9.0	2.2	3.0	4.0	11.0	1.9	0.0	4.0	11.0	1.9	0.0	4.0	11.0	1.9	0.0	4.0	11.0	1.9	0.0	6.0	9.0	2.2	3.0	4.0	11.0	1.9	0.0	4.0	11.0	1.9	0.0	4.0	11.0	1.9	0.0	4.0	11.0	1.9	0.0	4.0
941	4.0	11.0	1.9	0.0	4.0	11.0	1.9	0.0	4.0	11.0	1.9	0.0	4.0	11.0	1.9	0.0	4.0	11.0	1.9	0.0	4.0	11.0	1.9	0.0	4.0	11.0	1.9	0.0	6.0	9.0	2.2	3.0	4.0	11.0	1.9	0.0	4.0	11.0	1.9	0.0	4.0	11.0	1.9	0.0	4.0	11.0	1.9	0.0	6.0
942	4.0	11.0	1.9	0.0	4.0	11.0	1.9	0.0	4.0	11.0	1.9	0.0	4.0	11.0	1.9	0.0	4.0	11.0	1.9	0.0	4.0	11.0	1.9	0.0	4.0	11.0	1.9	0.0	4.0	11.0	1.9	0.0	4.0	11.0	1.9	0.0	4.0	11.0	1.9	0.0	4.0	11.0	1.9	0.0	6.0	9.0	2.2	3.0	6.0
943	6.0	9.0	2.2	3.0	6.0	9.0	2.2	3.0	6.0	9.0	2.2	3.0	4.0	11.0	1.9	0.0	6.0	9.0	2.2	3.0	4.0	11.0	1.9	0.0	4.0	11.0	1.9	0.0	4.0	11.0	1.9	0.0	4.0	11.0	1.9	0.0	4.0	11.0	1.9	0.0	4.0	11.0	1.9	0.0	4.0	11.0	1.9	0.0	4.0
944	6.0	9.0	2.2	3.0	6.0	9.0	2.2	3.0	4.0	11.0	1.9	0.0	4.0	11.0	1.9	0.0	4.0	11.0	1.9	0.0	4.0	11.0	1.9	0.0	4.0	11.0	1.9	0.0	4.0	11.0	1.9	0.0	4.0	11.0	1.9	0.0	6.0	9.0	2.2	3.0	4.0	11.0	1.9	0.0	6.0	9.0	2.2	3.0	4.0
945	4.0	11.0	1.9	0.0	4.0	11.0	1.9	0.0	4.0	11.0	1.9	0.0	4.0	11.0	1.9	0.0	4.0	11.0	1.9	0.0	4.0	11.0	1.9	0.0	4.0	11.0	1.9	0.0	4.0	11.0	1.9	0.0	4.0	11.0	1.9	0.0	6.0	9.0	2.2	3.0	4.0	11.0	1.9	0.0	6.0	9.0	2.2	3.0	6.0
946	4.0	11.0	1.9	0.0	4.0	11.0	1.9	0.0	4.0	11.0	1.9	0.0	4.0	11.0	1.9	0.0	4.0	11.0	1.9	0.0	6.0	9.0	2.2	3.0	4.0	11.0	1.9	0.0	4.0	11.0	1.9	0.0	4.0	11.0	1.9	0.0	4.0	11.0	1.9	0.0	4.0	11.0	1.9	0.0	4.0	11.0	1.9	0.0	6.0
947	4.0	11.0	1.9	0.0	6.0	9.0	2.2	3.0	4.0	11.0	1.9	0.0	4.0	11.0	1.9	0.0	4.0	11.0	1.9	0.0	4.0	11.0	1.9	0.0	4.0	11.0	1.9	0.0	4.0	11.0	1.9	0.0	4.0	11.0	1.9	0.0	4.0	11.0	1.9	0.0	4.0	11.0	1.9	0.0	4.0	11.0	1.9	0.0	6.0
948	4.0	11.0	1.9	0.0	4.0	11.0	1.9	0.0	6.0	9.0	2.2	3.0	4.0	11.0	1.9	0.0	6.0	9.0	2.2	3.0	4.0	11.0	1.9	0.0	4.0	11.0	1.9	0.0	4.0	11.0	1.9	0.0	4.0	11.0	1.9	0.0	4.0	11.0	1.9	0.0	6.0	9.0	2.2	3.0	4.0	11.0	1.9	0.0	4.0
949	4.0	11.0	1.9	0.0	6.0	9.0	2.2	3.0	4.0	11.0	1.9	0.0	6.0	9.0	2.2	3.0	4.0	11.0	1.9	0.0	4.0	11.0	1.9	0.0	6.0	9.0	2.2	3.0	4.0	11.0	1.9	0.0	4.0	11.0	1.9	0.0	6.0	9.0	2.2	3.0	4.0	11.0	1.9	0.0	4.0	11.0	1.9	0.0	4.0
950	4.0	11.0	1.9	0.0	6.0	9.0	2.2	3.0	4.0	11.0	1.9	0.0	4.0	11.0	1.9	0.0	4.0	11.0	1.9	0.0	4.0	11.0	1.9	0.0	6.0	9.0	2.2	3.0	4.0	11.0	1.9	0.0	4.0	11.0	1.9	0.0	4.0	11.0	1.9	0.0	4.0	11.0	1.9	0.0	6.0	9.0	2.2	3.0	4.0
951	4.0	11.0	1.9	0.0	4.0	11.0	1.9	0.0	4.0	11.0	1.9	0.0	4.0	11.0	1.9	0.0	4.0	11.0	1.9	0.0	6.0	9.0	2.2	3.0	4.0	11.0	1.9	0.0	6.0	9.0	2.2	3.0	4.0	11.0	1.9	0.0	6.0	9.0	2.2	3.0	6.0	9.0	2.2	3.0	4.0	11.0	1.9	0.0	6.0
952	4.0	11.0	1.9	0.0	4.0	11.0	1.9	0.0	4.0	11.0	1.9	0.0	4.0	11.0	1.9	0.0	6.0	9.0	2.2	3.0	4.0	11.0	1.9	0.0	4.0	11.0	1.9	0.0	4.0	11.0	1.9	0.0	6.0	9.0	2.2	3.0	4.0	11.0	1.9	0.0	6.0	9.0	2.2	3.0	4.0	11.0	1.9	0.0	6.0
953	4.0	11.0	1.9	0.0	6.0	9.0	2.2	3.0	6.0	9.0	2.2	3.0	4.0	11.0	1.9	0.0	6.0	9.0	2.2	3.0	4.0	11.0	1.9	0.0	4.0	11.0	1.9	0.0	4.0	11.0	1.9	0.0	4.0	11.0	1.9	0.0	4.0	11.0	1.9	0.0	6.0	9.0	2.2	3.0	4.0	11.0	1.9	0.0	4.0
954	4.0	11.0	1.9	0.0	4.0	11.0	1.9	0.0	4.0	11.0	1.9	0.0	4.0	11.0	1.9	0.0	6.0	9.0	2.2	3.0	4.0	11.0	1.9	0.0	6.0	9.0	2.2	3.0	6.0	9.0	2.2	3.0	4.0	11.0	1.9	0.0	4.0	11.0	1.9	0.0	4.0	11.0	1.9	0.0	4.0	11.0	1.9	0.0	6.0
955	4.0	11.0	1.9	0.0	6.0	9.0	2.2	3.0	6.0	9.0	2.2	3.0	4.0	11.0	1.9	0.0	4.0	11.0	1.9	0.0	4.0	11.0	1.9	0.0	4.0	11.0	1.9	0.0	6.0	9.0	2.2	3.0	4.0	11.0	1.9	0.0	4.0	11.0	1.9	0.0	4.0	11.0	1.9	0.0	4.0	11.0	1.9	0.0	4.0
956	4.0	11.0	1.9	0.0	6.0	9.0	2.2	3.0	4.0	11.0	1.9	0.0	4.0	11.0	1.9	0.0	4.0	11.0	1.9	0.0	6.0	9.0	2.2	3.0	6.0	9.0	2.2	3.0	4.0	11.0	1.9	0.0	4.0	11.0	1.9	0.0	4.0	11.0	1.9	0.0	4.0	11.0	1.9	0.0	4.0	11.0	1.9	0.0	6.0
957	4.0	11.0	1.9	0.0	4.0	11.0	1.9	0.0	4.0	11.0	1.9	0.0	6.0	9.0	2.2	3.0	6.0	9.0	2.2	3.0	4.0	11.0	1.9	0.0	6.0	9.0	2.2	3.0	4.0	11.0	1.9	0.0	4.0	11.0	1.9	0.0	4.0	11.0	1.9	0.0	4.0	11.0	1.9	0.0	4.0	11.0	1.9	0.0	4.0
958	6.0	9.0	2.2	3.0	4.0	11.0	1.9	0.0	4.0	11.0	1.9	0.0	6.0	9.0	2.2	3.0	4.0	11.0	1.9	0.0	4.0	11.0	1.9	0.0	4.0	11.0	1.9	0.0	4.0	11.0	1.9	0.0	4.0	11.0	1.9	0.0	4.0	11.0	1.9	0.0	4.0	11.0	1.9	0.0	4.0	11.0	1.9	0.0	4.0
959	4.0	11.0	1.9	0.0	4.0	11.0	1.9	0.0	4.0	11.0	1.9	0.0	4.0	11.0	1.9	0.0	4.0	11.0	1.9	0.0	6.0	9.0	2.2	3.0	4.0	11.0	1.9	0.0	4.0	11.0	1.9	0.0	4.0	11.0	1.9	0.0	4.0	11.0	1.9	0.0	6.0	9.0	2.2	3.0	4.0	11.0	1.9	0.0	4.0
960	4.0	11.0	1.9	0.0	4.0	11.0	1.9	0.0	4.0	11.0	1.9	0.0	4.0	11.0	1.9	0.0	4.0	11.0	1.9	0.0	4.0	11.0	1.9	0.0	6.0	9.0	2.2	3.0	4.0	11.0	1.9	0.0	4.0	11.0	1.9	0.0	4.0	11.0	1.9	0.0	6.0	9.0	2.2	3.0	4.0	11.0	1.9	0.0	4.0
961	4.0	11.0	1.9	0.0	4.0	11.0	1.9	0.0	6.0	9.0	2.2	3.0	4.0	11.0	1.9	0.0	6.0	9.0	2.2	3.0	4.0	11.0	1.9	0.0	6.0	9.0	2.2	3.0	4.0	11.0	1.9	0.0	6.0	9.0	2.2	3.0	4.0	11.0	1.9	0.0	6.0	9.0	2.2	3.0	4.0	11.0	1.9	0.0	4.0
962	4.0	11.0	1.9	0.0	4.0	11.0	1.9	0.0	4.0	11.0	1.9	0.0	4.0	11.0	1.9	0.0	4.0	11.0	1.9	0.0	4.0	11.0	1.9	0.0	4.0	11.0	1.9	0.0	6.0	9.0	2.2	3.0	4.0	11.0	1.9	0.0	4.0	11.0	1.9	0.0	6.0	9.0	2.2	3.0	4.0	11.0	1.9	0.0	4.0
963	6.0	9.0	2.2	3.0	4.0	11.0	1.9	0.0	6.0	9.0	2.2	3.0	4.0	11.0	1.9	0.0	4.0	11.0	1.9	0.0	4.0	11.0	1.9	0.0	4.0	11.0	1.9	0.0	4.0	11.0	1.9	0.0	4.0	11.0	1.9	0.0	4.0	11.0	1.9	0.0	4.0	11.0	1.9	0.0	4.0	11.0	1.9	0.0	6.0
964	4.0	11.0	1.9	0.0	4.0	11.0	1.9	0.0	4.0	11.0	1.9	0.0	4.0	11.0	1.9	0.0	6.0	9.0	2.2	3.0	4.0	11.0	1.9	0.0	6.0	9.0	2.2	3.0	6.0	9.0	2.2	3.0	4.0	11.0	1.9	0.0	4.0	11.0	1.9	0.0	4.0	11.0	1.9	0.0	4.0	11.0	1.9	0.0	4.0
965	4.0	11.0	1.9	0.0	6.0	9.0	2.2	3.0	4.0	11.0	1.9	0.0	4.0	11.0	1.9	0.0	4.0	11.0	1.9	0.0	6.0	9.0	2.2	3.0	4.0	11.0	1.9	0.0	4.0	11.0	1.9	0.0	4.0	11.0	1.9	0.0	4.0	11.0	1.9	0.0	4.0	11.0	1.9	0.0	6.0	9.0	2.2	3.0	4.0
966	6.0	9.0	2.2	3.0	4.0	11.0	1.9	0.0	4.0	11.0	1.9	0.0	4.0	11.0	1.9	0.0	4.0	11.0	1.9	0.0	4.0	11.0	1.9	0.0	4.0	11.0	1.9	0.0	4.0	11.0	1.9	0.0	4.0	11.0	1.9	0.0	4.0	11.0	1.9	0.0	4.0	11.0	1.9	0.0	6.0	9.0	2.2	3.0	6.0
967	6.0	9.0	2.2	3.0	6.0	9.0	2.2	3.0	4.0	11.0	1.9	0.0	6.0	9.0	2.2	3.0	4.0	11.0	1.9	0.0	4.0	11.0	1.9	0.0	4.0	11.0	1.9	0.0	4.0	11.0	1.9	0.0	4.0	11.0	1.9	0.0	4.0	11.0	1.9	0.0	4.0	11.0	1.9	0.0	4.0	11.0	1.9	0.0	4.0
968	6.0	9.0	2.2	3.0	6.0	9.0	2.2	3.0	4.0	11.0	1.9	0.0	6.0	9.0	2.2	3.0	4.0	11.0	1.9	0.0	6.0	9.0	2.2	3.0	4.0	11.0	1.9	0.0	4.0	11.0	1.9	0.0	6.0	9.0	2.2	3.0	4.0	11.0	1.9	0.0	4.0	11.0	1.9	0.0	4.0	11.0	1.9	0.0	6.0
969	4.0	11.0	1.9	0.0	4.0	11.0	1.9	0.0	4.0	11.0	1.9	0.0	4.0	11.0	1.9	0.0	6.0	9.0	2.2	3.0	6.0	9.0	2.2	3.0	4.0	11.0	1.9	0.0	4.0	11.0	1.9	0.0	4.0	11.0	1.9	0.0	4.0	11.0	1.9	0.0	6.0	9.0	2.2	3.0	4.0	11.0	1.9	0.0	4.0
970	4.0	11.0	1.9	0.0	4.0	11.0	1.9	0.0	4.0	11.0	1.9	0.0	4.0	11.0	1.9	0.0	4.0	11.0	1.9	0.0	4.0	11.0	1.9	0.0	4.0	11.0	1.9	0.0	4.0	11.0	1.9	0.0	6.0	9.0	2.2	3.0	4.0	11.0	1.9	0.0	4.0	11.0	1.9	0.0	4.0	11.0	1.9	0.0	6.0
971	6.0	9.0	2.2	3.0	6.0	9.0	2.2	3.0	4.0	11.0	1.9	0.0	6.0	9.0	2.2	3.0	4.0	11.0	1.9	0.0	4.0	11.0	1.9	0.0	4.0	11.0	1.9	0.0	4.0	11.0	1.9	0.0	6.0	9.0	2.2	3.0	4.0	11.0	1.9	0.0	4.0	11.0	1.9	0.0	4.0	11.0	1.9	0.0	4.0
972	6.0	9.0	2.2	3.0	4.0	11.0	1.9	0.0	4.0	11.0	1.9	0.0	4.0	11.0	1.9	0.0	4.0	11.0	1.9	0.0	4.0	11.0	1.9	0.0	4.0	11.0	1.9	0.0	4.0	11.0	1.9	0.0	4.0	11.0	1.9	0.0	6.0	9.0	2.2	3.0	4.0	11.0	1.9	0.0	4.0	11.0	1.9	0.0	6.0
973	4.0	11.0	1.9	0.0	6.0	9.0	2.2	3.0	4.0	11.0	1.9	0.0	6.0	9.0	2.2	3.0	4.0	11.0	1.9	0.0	4.0	11.0	1.9	0.0	4.0	11.0	1.9	0.0	4.0	11.0	1.9	0.0	4.0	11.0	1.9	0.0	4.0	11.0	1.9	0.0	4.0	11.0	1.9	0.0	6.0	9.0	2.2	3.0	4.0
974	4.0	11.0	1.9	0.0	4.0	11.0	1.9	0.0	4.0	11.0	1.9	0.0	6.0	9.0	2.2	3.0	6.0	9.0	2.2	3.0	4.0	11.0	1.9	0.0	4.0	11.0	1.9	0.0	4.0	11.0	1.9	0.0	6.0	9.0	2.2	3.0	4.0	11.0	1.9	0.0	4.0	11.0	1.9	0.0	4.0	11.0	1.9	0.0	4.0
975	4.0	11.0	1.9	0.0	4.0	11.0	1.9	0.0	4.0	11.0	1.9	0.0	6.0	9.0	2.2	3.0	4.0	11.0	1.9	0.0	4.0	11.0	1.9	0.0	4.0	11.0	1.9	0.0	6.0	9.0	2.2	3.0	4.0	11.0	1.9	0.0	4.0	11.0	1.9	0.0	4.0	11.0	1.9	0.0	4.0	11.0	1.9	0.0	6.0
976	4.0	11.0	1.9	0.0	6.0	9.0	2.2	3.0	6.0	9.0	2.2	3.0	4.0	11.0	1.9	0.0	6.0	9.0	2.2	3.0	4.0	11.0	1.9	0.0	4.0	11.0	1.9	0.0	6.0	9.0	2.2	3.0	4.0	11.0	1.9	0.0	4.0	11.0	1.9	0.0	6.0	9.0	2.2	3.0	4.0	11.0	1.9	0.0	4.0
977	4.0	11.0	1.9	0.0	4.0	11.0	1.9	0.0	4.0	11.0	1.9	0.0	4.0	11.0	1.9	0.0	6.0	9.0	2.2	3.0	6.0	9.0	2.2	3.0	6.0	9.0	2.2	3.0	4.0	11.0	1.9	0.0	4.0	11.0	1.9	0.0	6.0	9.0	2.2	3.0	6.0	9.0	2.2	3.0	4.0	11.0	1.9	0.0	4.0
978	4.0	11.0	1.9	0.0	4.0	11.0	1.9	0.0	4.0	11.0	1.9	0.0	6.0	9.0	2.2	3.0	4.0	11.0	1.9	0.0	6.0	9.0	2.2	3.0	4.0	11.0	1.9	0.0	6.0	9.0	2.2	3.0	4.0	11.0	1.9	0.0	6.0	9.0	2.2	3.0	4.0	11.0	1.9	0.0	4.0	11.0	1.9	0.0	4.0
979	4.0	11.0	1.9	0.0	6.0	9.0	2.2	3.0	4.0	11.0	1.9	0.0	4.0	11.0	1.9	0.0	4.0	11.0	1.9	0.0	6.0	9.0	2.2	3.0	4.0	11.0	1.9	0.0	4.0	11.0	1.9	0.0	4.0	11.0	1.9	0.0	4.0	11.0	1.9	0.0	6.0	9.0	2.2	3.0	4.0	11.0	1.9	0.0	6.0
980	6.0	9.0	2.2	3.0	4.0	11.0	1.9	0.0	4.0	11.0	1.9	0.0	4.0	11.0	1.9	0.0	4.0	11.0	1.9	0.0	4.0	11.0	1.9	0.0	6.0	9.0	2.2	3.0	4.0	11.0	1.9	0.0	4.0	11.0	1.9	0.0	4.0	11.0	1.9	0.0	4.0	11.0	1.9	0.0	6.0	9.0	2.2	3.0	4.0
981	6.0	9.0	2.2	3.0	4.0	11.0	1.9	0.0	4.0	11.0	1.9	0.0	6.0	9.0	2.2	3.0	4.0	11.0	1.9	0.0	4.0	11.0	1.9	0.0	4.0	11.0	1.9	0.0	4.0	11.0	1.9	0.0	6.0	9.0	2.2	3.0	4.0	11.0	1.9	0.0	4.0	11.0	1.9	0.0	4.0	11.0	1.9	0.0	4.0
982	4.0	11.0	1.9	0.0	4.0	11.0	1.9	0.0	4.0	11.0	1.9	0.0	4.0	11.0	1.9	0.0	4.0	11.0	1.9	0.0	6.0	9.0	2.2	3.0	4.0	11.0	1.9	0.0	6.0	9.0	2.2	3.0	4.0	11.0	1.9	0.0	4.0	11.0	1.9	0.0	4.0	11.0	1.9	0.0	4.0	11.0	1.9	0.0	4.0
983	6.0	9.0	2.2	3.0	4.0	11.0	1.9	0.0	4.0	11.0	1.9	0.0	4.0	11.0	1.9	0.0	4.0	11.0	1.9	0.0	4.0	11.0	1.9	0.0	4.0	11.0	1.9	0.0	4.0	11.0	1.9	0.0	4.0	11.0	1.9	0.0	4.0	11.0	1.9	0.0	4.0	11.0	1.9	0.0	6.0	9.0	2.2	3.0	4.0
984	4.0	11.0	1.9	0.0	6.0	9.0	2.2	3.0	6.0	9.0	2.2	3.0	4.0	11.0	1.9	0.0	4.0	11.0	1.9	0.0	4.0	11.0	1.9	0.0	6.0	9.0	2.2	3.0	4.0	11.0	1.9	0.0	4.0	11.0	1.9	0.0	6.0	9.0	2.2	3.0	4.0	11.0	1.9	0.0	4.0	11.0	1.9	0.0	4.0
985	4.0	11.0	1.9	0.0	4.0	11.0	1.9	0.0	4.0	11.0	1.9	0.0	4.0	11.0	1.9	0.0	6.0	9.0	2.2	3.0	4.0	11.0	1.9	0.0	6.0	9.0	2.2	3.0	6.0	9.0	2.2	3.0	4.0	11.0	1.9	0.0	6.0	9.0	2.2	3.0	4.0	11.0	1.9	0.0	4.0	11.0	1.9	0.0	4.0
986	6.0	9.0	2.2	3.0	4.0	11.0	1.9	0.0	4.0	11.0	1.9	0.0	4.0	11.0	1.9	0.0	4.0	11.0	1.9	0.0	4.0	11.0	1.9	0.0	6.0	9.0	2.2	3.0	4.0	11.0	1.9	0.0	4.0	11.0	1.9	0.0	4.0	11.0	1.9	0.0	6.0	9.0	2.2	3.0	4.0	11.0	1.9	0.0	6.0
987	4.0	11.0	1.9	0.0	4.0	11.0	1.9	0.0	4.0	11.0	1.9	0.0	4.0	11.0	1.9	0.0	4.0	11.0	1.9	0.0	4.0	11.0	1.9	0.0	4.0	11.0	1.9	0.0	6.0	9.0	2.2	3.0	4.0	11.0	1.9	0.0	6.0	9.0	2.2	3.0	4.0	11.0	1.9	0.0	4.0	11.0	1.9	0.0	6.0
988	4.0	11.0	1.9	0.0	4.0	11.0	1.9	0.0	6.0	9.0	2.2	3.0	4.0	11.0	1.9	0.0	4.0	11.0	1.9	0.0	6.0	9.0	2.2	3.0	4.0	11.0	1.9	0.0	4.0	11.0	1.9	0.0	4.0	11.0	1.9	0.0	4.0	11.0	1.9	0.0	4.0	11.0	1.9	0.0	4.0	11.0	1.9	0.0	4.0
989	6.0	9.0	2.2	3.0	6.0	9.0	2.2	3.0	4.0	11.0	1.9	0.0	4.0	11.0	1.9	0.0	6.0	9.0	2.2	3.0	4.0	11.0	1.9	0.0	4.0	11.0	1.9	0.0	6.0	9.0	2.2	3.0	4.0	11.0	1.9	0.0	4.0	11.0	1.9	0.0	6.0	9.0	2.2	3.0	4.0	11.0	1.9	0.0	4.0
990	6.0	9.0	2.2	3.0	4.0	11.0	1.9	0.0	4.0	11.0	1.9	0.0	6.0	9.0	2.2	3.0	4.0	11.0	1.9	0.0	4.0	11.0	1.9	0.0	4.0	11.0	1.9	0.0	4.0	11.0	1.9	0.0	4.0	11.0	1.9	0.0	4.0	11.0	1.9	0.0	4.0	11.0	1.9	0.0	6.0	9.0	2.2	3.0	4.0
991	6.0	9.0	2.2	3.0	6.0	9.0	2.2	3.0	6.0	9.0	2.2	3.0	6.0	9.0	2.2	3.0	4.0	11.0	1.9	0.0	6.0	9.0	2.2	3.0	4.0	11.0	1.9	0.0	4.0	11.0	1.9	0.0	4.0	11.0	1.9	0.0	4.0	11.0	1.9	0.0	6.0	9.0	2.2	3.0	4.0	11.0	1.9	0.0	4.0
992	4.0	11.0	1.9	0.0	4.0	11.0	1.9	0.0	4.0	11.0	1.9	0.0	6.0	9.0	2.2	3.0	6.0	9.0	2.2	3.0	4.0	11.0	1.9	0.0	4.0	11.0	1.9	0.0	6.0	9.0	2.2	3.0	4.0	11.0	1.9	0.0	4.0	11.0	1.9	0.0	4.0	11.0	1.9	0.0	4.0	11.0	1.9	0.0	4.0
993	4.0	11.0	1.9	0.0	4.0	11.0	1.9	0.0	6.0	9.0	2.2	3.0	4.0	11.0	1.9	0.0	4.0	11.0	1.9	0.0	6.0	9.0	2.2	3.0	4.0	11.0	1.9	0.0	4.0	11.0	1.9	0.0	6.0	9.0	2.2	3.0	4.0	11.0	1.9	0.0	4.0	11.0	1.9	0.0	4.0	11.0	1.9	0.0	4.0
994	4.0	11.0	1.9	0.0	4.0	11.0	1.9	0.0	4.0	11.0	1.9	0.0	4.0	11.0	1.9	0.0	4.0	11.0	1.9	0.0	6.0	9.0	2.2	3.0	6.0	9.0	2.2	3.0	4.0	11.0	1.9	0.0	4.0	11.0	1.9	0.0	4.0	11.0	1.9	0.0	4.0	11.0	1.9	0.0	4.0	11.0	1.9	0.0	4.0
995	4.0	11.0	1.9	0.0	4.0	11.0	1.9	0.0	6.0	9.0	2.2	3.0	4.0	11.0	1.9	0.0	4.0	11.0	1.9	0.0	4.0	11.0	1.9	0.0	6.0	9.0	2.2	3.0	4.0	11.0	1.9	0.0	6.0	9.0	2.2	3.0	6.0	9.0	2.2	3.0	6.0	9.0	2.2	3.0	4.0	11.0	1.9	0.0	4.0
996	4.0	11.0	1.9	0.0	4.0	11.0	1.9	0.0	4.0	11.0	1.9	0.0	6.0	9.0	2.2	3.0	4.0	11.0	1.9	0.0	6.0	9.0	2.2	3.0	6.0	9.0	2.2	3.0	6.0	9.0	2.2	3.0	4.0	11.0	1.9	0.0	6.0	9.0	2.2	3.0	4.0	11.0	1.9	0.0	6.0	9.0	2.2	3.0	4.0
997	4.0	11.0	1.9	0.0	4.0	11.0	1.9	0.0	4.0	11.0	1.9	0.0	4.0	11.0	1.9	0.0	4.0	11.0	1.9	0.0	4.0	11.0	1.9	0.0	4.0	11.0	1.9	0.0	4.0	11.0	1.9	0.0	4.0	11.0	1.9	0.0	4.0	11.0	1.9	0.0	6.0	9.0	2.2	3.0	6.0	9.0	2.2	3.0	4.0
998	4.0	11.0	1.9	0.0	6.0	9.0	2.2	3.0	4.0	11.0	1.9	0.0	4.0	11.0	1.9	0.0	6.0	9.0	2.2	3.0	4.0	11.0	1.9	0.0	4.0	11.0	1.9	0.0	4.0	11.0	1.9	0.0	4.0	11.0	1.9	0.0	4.0	11.0	1.9	0.0	4.0	11.0	1.9	0.0	6.0	9.0	2.2	3.0	6.0
999	4.0	11.0	1.9	0.0	4.0	11.0	1.9	0.0	4.0	11.0	1.9	0.0	4.0	11.0	1.9	0.0	6.0	9.0	2.2	3.0	4.0	11.0	1.9	0.0	4.0	11.0	1.9	0.0	4.0	11.0	1.9	0.0	4.0	11.0	1.9	0.0	6.0	9.0	2.2	3.0	6.0	9.0	2.2	3.0	4.0	11.0	1.9	0.0	4.0
1000	4.0	11.0	1.9	0.0	6.0	9.0	2.2	3.0	4.0	11.0	1.9	0.0	6.0	9.0	2.2	3.0	4.0	11.0	1.9	0.0	4.0	11.0	1.9	0.0	4.0	11.0	1.9	0.0	4.0	11.0	1.9	0.0	4.0	11.0	1.9	0.0	4.0	11.0	1.9	0.0	4.0	11.0	1.9	0.0	4.0	11.0	1.9	0.0	4.0
1001	4.0	11.0	1.9	0.0	4.0	11.0	1.9	0.0	6.0	9.0	2.2	3.0	4.0	11.0	1.9	0.0	6.0	9.0	2.2	3.0	4.0	11.0	1.9	0.0	6.0	9.0	2.2	3.0	4.0	11.0	1.9	0.0	4.0	11.0	1.9	0.0	6.0	9.0	2.2	3.0	4.0	11.0	1.9	0.0	4.0	11.0	1.9	0.0	4.0
1002	4.0	11.0	1.9	0.0	6.0	9.0	2.2	3.0	4.0	11.0	1.9	0.0	4.0	11.0	1.9	0.0	4.0	11.0	1.9	0.0	4.0	11.0	1.9	0.0	4.0	11.0	1.9	0.0	4.0	11.0	1.9	0.0	4.0	11.0	1.9	0.0	4.0	11.0	1.9	0.0	6.0	9.0	2.2	3.0	4.0	11.0	1.9	0.0	4.0
1003	4.0	11.0	1.9	0.0	6.0	9.0	2.2	3.0	4.0	11.0	1.9	0.0	4.0	11.0	1.9	0.0	4.0	11.0	1.9	0.0	4.0	11.0	1.9	0.0	4.0	11.0	1.9	0.0	4.0	11.0	1.9	0.0	6.0	9.0	2.2	3.0	4.0	11.0	1.9	0.0	4.0	11.0	1.9	0.0	6.0	9.0	2.2	3.0	4.0
1004	4.0	11.0	1.9	0.0	4.0	11.0	1.9	0.0	4.0	11.0	1.9	0.0	4.0	11.0	1.9	0.0	4.0	11.0	1.9	0.0	6.0	9.0	2.2	3.0	6.0	9.0	2.2	3.0	4.0	11.0	1.9	0.0	4.0	11.0	1.9	0.0	6.0	9.0	2.2	3.0	4.0	11.0	1.9	0.0	4.0	11.0	1.9	0.0	6.0
1005	4.0	11.0	1.9	0.0	4.0	11.0	1.9	0.0	4.0	11.0	1.9	0.0	4.0	11.0	1.9	0.0	6.0	9.0	2.2	3.0	4.0	11.0	1.9	0.0	4.0	11.0	1.9	0.0	4.0	11.0	1.9	0.0	4.0	11.0	1.9	0.0	4.0	11.0	1.9	0.0	6.0	9.0	2.2	3.0	4.0	11.0	1.9	0.0	6.0
1006	4.0	11.0	1.9	0.0	4.0	11.0	1.9	0.0	6.0	9.0	2.2	3.0	4.0	11.0	1.9	0.0	4.0	11.0	1.9	0.0	4.0	11.0	1.9	0.0	4.0	11.0	1.9	0.0	6.0	9.0	2.2	3.0	4.0	11.0	1.9	0.0	4.0	11.0	1.9	0.0	6.0	9.0	2.2	3.0	4.0	11.0	1.9	0.0	6.0
1007	4.0	11.0	1.9	0.0	6.0	9.0	2.2	3.0	6.0	9.0	2.2	3.0	4.0	11.0	1.9	0.0	4.0	11.0	1.9	0.0	4.0	11.0	1.9	0.0	6.0	9.0	2.2	3.0	4.0	11.0	1.9	0.0	4.0	11.0	1.9	0.0	4.0	11.0	1.9	0.0	4.0	11.0	1.9	0.0	4.0	11.0	1.9	0.0	6.0
1008	4.0	11.0	1.9	0.0	4.0	11.0	1.9	0.0	6.0	10.0	2.28	1.0	4.0	11.0	1.9	0.0	4.0	11.0	1.9	0.0	4.0	11.0	1.9	0.0	4.0	11.0	1.9	0.0	4.0	11.0	1.9	0.0	4.0	11.0	1.9	0.0	4.0	11.0	1.9	0.0	4.0	11.0	1.9	0.0	4.0	11.0	1.9	0.0	4.0
1009	4.0	11.0	1.9	0.0	6.0	10.0	2.28	1.0	4.0	11.0	1.9	0.0	4.0	11.0	1.9	0.0	6.0	10.0	2.28	1.0	4.0	11.0	1.9	0.0	4.0	11.0	1.9	0.0	4.0	11.0	1.9	0.0	4.0	11.0	1.9	0.0	6.0	10.0	2.28	1.0	4.0	11.0	1.9	0.0	4.0	11.0	1.9	0.0	4.0
1010	6.0	10.0	2.28	1.0	4.0	11.0	1.9	0.0	4.0	11.0	1.9	0.0	4.0	11.0	1.9	0.0	4.0	11.0	1.9	0.0	4.0	11.0	1.9	0.0	4.0	11.0	1.9	0.0	4.0	11.0	1.9	0.0	4.0	11.0	1.9	0.0	4.0	11.0	1.9	0.0	4.0	11.0	1.9	0.0	4.0	11.0	1.9	0.0	6.0
1011	6.0	10.0	2.28	1.0	4.0	11.0	1.9	0.0	4.0	11.0	1.9	0.0	4.0	11.0	1.9	0.0	6.0	10.0	2.28	1.0	4.0	11.0	1.9	0.0	4.0	11.0	1.9	0.0	6.0	10.0	2.28	1.0	4.0	11.0	1.9	0.0	6.0	10.0	2.28	1.0	6.0	10.0	2.28	1.0	4.0	11.0	1.9	0.0	4.0
1012	4.0	11.0	1.9	0.0	6.0	10.0	2.28	1.0	6.0	10.0	2.28	1.0	4.0	11.0	1.9	0.0	4.0	11.0	1.9	0.0	6.0	10.0	2.28	1.0	4.0	11.0	1.9	0.0	4.0	11.0	1.9	0.0	4.0	11.0	1.9	0.0	4.0	11.0	1.9	0.0	4.0	11.0	1.9	0.0	4.0	11.0	1.9	0.0	6.0
1013	6.0	10.0	2.28	1.0	4.0	11.0	1.9	0.0	4.0	11.0	1.9	0.0	4.0	11.0	1.9	0.0	6.0	10.0	2.28	1.0	4.0	11.0	1.9	0.0	4.0	11.0	1.9	0.0	6.0	10.0	2.28	1.0	4.0	11.0	1.9	0.0	6.0	10.0	2.28	1.0	4.0	11.0	1.9	0.0	4.0	11.0	1.9	0.0	4.0
1014	4.0	11.0	1.9	0.0	6.0	10.0	2.28	1.0	4.0	11.0	1.9	0.0	4.0	11.0	1.9	0.0	4.0	11.0	1.9	0.0	6.0	10.0	2.28	1.0	4.0	11.0	1.9	0.0	4.0	11.0	1.9	0.0	4.0	11.0	1.9	0.0	4.0	11.0	1.9	0.0	6.0	10.0	2.28	1.0	6.0	10.0	2.28	1.0	4.0
1015	4.0	11.0	1.9	0.0	4.0	11.0	1.9	0.0	4.0	11.0	1.9	0.0	6.0	10.0	2.28	1.0	4.0	11.0	1.9	0.0	4.0	11.0	1.9	0.0	4.0	11.0	1.9	0.0	4.0	11.0	1.9	0.0	4.0	11.0	1.9	0.0	4.0	11.0	1.9	0.0	4.0	11.0	1.9	0.0	4.0	11.0	1.9	0.0	4.0
1016	4.0	11.0	1.9	0.0	6.0	10.0	2.28	1.0	4.0	11.0	1.9	0.0	4.0	11.0	1.9	0.0	4.0	11.0	1.9	0.0	4.0	11.0	1.9	0.0	4.0	11.0	1.9	0.0	4.0	11.0	1.9	0.0	4.0	11.0	1.9	0.0	4.0	11.0	1.9	0.0	4.0	11.0	1.9	0.0	4.0	11.0	1.9	0.0	4.0
1017	4.0	11.0	1.9	0.0	6.0	10.0	2.28	1.0	4.0	11.0	1.9	0.0	4.0	11.0	1.9	0.0	4.0	11.0	1.9	0.0	6.0	10.0	2.28	1.0	4.0	11.0	1.9	0.0	4.0	11.0	1.9	0.0	4.0	11.0	1.9	0.0	4.0	11.0	1.9	0.0	4.0	11.0	1.9	0.0	4.0	11.0	1.9	0.0	4.0
1018	4.0	11.0	1.9	0.0	4.0	11.0	1.9	0.0	4.0	11.0	1.9	0.0	4.0	11.0	1.9	0.0	4.0	11.0	1.9	0.0	4.0	11.0	1.9	0.0	6.0	10.0	2.28	1.0	4.0	11.0	1.9	0.0	4.0	11.0	1.9	0.0	4.0	11.0	1.9	0.0	4.0	11.0	1.9	0.0	6.0	10.0	2.28	1.0	4.0
1019	4.0	11.0	1.9	0.0	6.0	10.0	2.28	1.0	6.0	10.0	2.28	1.0	4.0	11.0	1.9	0.0	4.0	11.0	1.9	0.0	4.0	11.0	1.9	0.0	6.0	10.0	2.28	1.0	4.0	11.0	1.9	0.0	4.0	11.0	1.9	0.0	4.0	11.0	1.9	0.0	4.0	11.0	1.9	0.0	4.0	11.0	1.9	0.0	4.0
1020	4.0	11.0	1.9	0.0	4.0	11.0	1.9	0.0	4.0	11.0	1.9	0.0	4.0	11.0	1.9	0.0	4.0	11.0	1.9	0.0	4.0	11.0	1.9	0.0	4.0	11.0	1.9	0.0	4.0	11.0	1.9	0.0	4.0	11.0	1.9	0.0	4.0	11.0	1.9	0.0	6.0	10.0	2.28	1.0	4.0	11.0	1.9	0.0	6.0
1021	4.0	11.0	1.9	0.0	4.0	11.0	1.9	0.0	4.0	11.0	1.9	0.0	4.0	11.0	1.9	0.0	6.0	10.0	2.28	1.0	4.0	11.0	1.9	0.0	4.0	11.0	1.9	0.0	6.0	10.0	2.28	1.0	6.0	10.0	2.28	1.0	4.0	11.0	1.9	0.0	6.0	10.0	2.28	1.0	4.0	11.0	1.9	0.0	4.0
1022	4.0	11.0	1.9	0.0	4.0	11.0	1.9	0.0	6.0	10.0	2.28	1.0	4.0	11.0	1.9	0.0	6.0	10.0	2.28	1.0	6.0	10.0	2.28	1.0	4.0	11.0	1.9	0.0	6.0	10.0	2.28	1.0	6.0	10.0	2.28	1.0	4.0	11.0	1.9	0.0	6.0	10.0	2.28	1.0	6.0	10.0	2.28	1.0	4.0
1023	4.0	11.0	1.9	0.0	4.0	11.0	1.9	0.0	4.0	11.0	1.9	0.0	6.0	10.0	2.28	1.0	4.0	11.0	1.9	0.0	4.0	11.0	1.9	0.0	4.0	11.0	1.9	0.0	4.0	11.0	1.9	0.0	4.0	11.0	1.9	0.0	4.0	11.0	1.9	0.0	4.0	11.0	1.9	0.0	6.0	10.0	2.28	1.0	4.0
1024	4.0	11.0	1.9	0.0	6.0	10.0	2.28	1.0	4.0	11.0	1.9	0.0	4.0	11.0	1.9	0.0	4.0	11.0	1.9	0.0	4.0	11.0	1.9	0.0	4.0	11.0	1.9	0.0	6.0	10.0	2.28	1.0	4.0	11.0	1.9	0.0	4.0	11.0	1.9	0.0	6.0	10.0	2.28	1.0	4.0	11.0	1.9	0.0	4.0
1025	4.0	11.0	1.9	0.0	4.0	11.0	1.9	0.0	4.0	11.0	1.9	0.0	4.0	11.0	1.9	0.0	4.0	11.0	1.9	0.0	4.0	11.0	1.9	0.0	6.0	10.0	2.28	1.0	4.0	11.0	1.9	0.0	4.0	11.0	1.9	0.0	4.0	11.0	1.9	0.0	4.0	11.0	1.9	0.0	4.0	11.0	1.9	0.0	4.0
1026	4.0	11.0	1.9	0.0	4.0	11.0	1.9	0.0	4.0	11.0	1.9	0.0	4.0	11.0	1.9	0.0	4.0	11.0	1.9	0.0	4.0	11.0	1.9	0.0	4.0	11.0	1.9	0.0	4.0	11.0	1.9	0.0	4.0	11.0	1.9	0.0	6.0	10.0	2.28	1.0	4.0	11.0	1.9	0.0	4.0	11.0	1.9	0.0	6.0
1027	6.0	10.0	2.28	1.0	4.0	11.0	1.9	0.0	4.0	11.0	1.9	0.0	4.0	11.0	1.9	0.0	4.0	11.0	1.9	0.0	4.0	11.0	1.9	0.0	6.0	10.0	2.28	1.0	4.0	11.0	1.9	0.0	6.0	10.0	2.28	1.0	6.0	10.0	2.28	1.0	4.0	11.0	1.9	0.0	4.0	11.0	1.9	0.0	4.0
1028	4.0	11.0	1.9	0.0	4.0	11.0	1.9	0.0	6.0	10.0	2.28	1.0	4.0	11.0	1.9	0.0	4.0	11.0	1.9	0.0	4.0	11.0	1.9	0.0	6.0	10.0	2.28	1.0	6.0	10.0	2.28	1.0	4.0	11.0	1.9	0.0	6.0	10.0	2.28	1.0	4.0	11.0	1.9	0.0	4.0	11.0	1.9	0.0	6.0
1029	4.0	11.0	1.9	0.0	6.0	10.0	2.28	1.0	4.0	11.0	1.9	0.0	4.0	11.0	1.9	0.0	6.0	10.0	2.28	1.0	4.0	11.0	1.9	0.0	4.0	11.0	1.9	0.0	4.0	11.0	1.9	0.0	4.0	11.0	1.9	0.0	4.0	11.0	1.9	0.0	4.0	11.0	1.9	0.0	4.0	11.0	1.9	0.0	4.0
1030	4.0	11.0	1.9	0.0	4.0	11.0	1.9	0.0	4.0	11.0	1.9	0.0	6.0	10.0	2.28	1.0	4.0	11.0	1.9	0.0	4.0	11.0	1.9	0.0	4.0	11.0	1.9	0.0	4.0	11.0	1.9	0.0	6.0	10.0	2.28	1.0	6.0	10.0	2.28	1.0	4.0	11.0	1.9	0.0	4.0	11.0	1.9	0.0	4.0
1031	4.0	11.0	1.9	0.0	4.0	11.0	1.9	0.0	6.0	10.0	2.28	1.0	4.0	11.0	1.9	0.0	4.0	11.0	1.9	0.0	4.0	11.0	1.9	0.0	4.0	11.0	1.9	0.0	4.0	11.0	1.9	0.0	4.0	11.0	1.9	0.0	4.0	11.0	1.9	0.0	4.0	11.0	1.9	0.0	6.0	10.0	2.28	1.0	4.0
1032	4.0	11.0	1.9	0.0	6.0	10.0	2.28	1.0	4.0	11.0	1.9	0.0	4.0	11.0	1.9	0.0	4.0	11.0	1.9	0.0	4.0	11.0	1.9	0.0	6.0	10.0	2.28	1.0	4.0	11.0	1.9	0.0	4.0	11.0	1.9	0.0	4.0	11.0	1.9	0.0	4.0	11.0	1.9	0.0	4.0	11.0	1.9	0.0	6.0
1033	4.0	11.0	1.9	0.0	4.0	11.0	1.9	0.0	4.0	11.0	1.9	0.0	4.0	11.0	1.9	0.0	4.0	11.0	1.9	0.0	4.0	11.0	1.9	0.0	4.0	11.0	1.9	0.0	4.0	11.0	1.9	0.0	4.0	11.0	1.9	0.0	4.0	11.0	1.9	0.0	6.0	10.0	2.28	1.0	4.0	11.0	1.9	0.0	4.0
1034	6.0	10.0	2.28	1.0	4.0	11.0	1.9	0.0	6.0	10.0	2.28	1.0	4.0	11.0	1.9	0.0	4.0	11.0	1.9	0.0	4.0	11.0	1.9	0.0	4.0	11.0	1.9	0.0	4.0	11.0	1.9	0.0	4.0	11.0	1.9	0.0	6.0	10.0	2.28	1.0	4.0	11.0	1.9	0.0	4.0	11.0	1.9	0.0	4.0
1035	4.0	11.0	1.9	0.0	4.0	11.0	1.9	0.0	4.0	11.0	1.9	0.0	6.0	10.0	2.28	1.0	4.0	11.0	1.9	0.0	4.0	11.0	1.9	0.0	4.0	11.0	1.9	0.0	4.0	11.0	1.9	0.0	4.0	11.0	1.9	0.0	4.0	11.0	1.9	0.0	6.0	10.0	2.28	1.0	4.0	11.0	1.9	0.0	4.0
1036	4.0	11.0	1.9	0.0	4.0	11.0	1.9	0.0	4.0	11.0	1.9	0.0	4.0	11.0	1.9	0.0	4.0	11.0	1.9	0.0	4.0	11.0	1.9	0.0	4.0	11.0	1.9	0.0	4.0	11.0	1.9	0.0	6.0	10.0	2.28	1.0	4.0	11.0	1.9	0.0	4.0	11.0	1.9	0.0	4.0	11.0	1.9	0.0	4.0
1037	6.0	10.0	2.28	1.0	4.0	11.0	1.9	0.0	4.0	11.0	1.9	0.0	4.0	11.0	1.9	0.0	6.0	10.0	2.28	1.0	4.0	11.0	1.9	0.0	6.0	10.0	2.28	1.0	4.0	11.0	1.9	0.0	4.0	11.0	1.9	0.0	4.0	11.0	1.9	0.0	6.0	10.0	2.28	1.0	6.0	10.0	2.28	1.0	6.0
1038	6.0	10.0	2.28	1.0	4.0	11.0	1.9	0.0	4.0	11.0	1.9	0.0	4.0	11.0	1.9	0.0	6.0	10.0	2.28	1.0	4.0	11.0	1.9	0.0	4.0	11.0	1.9	0.0	4.0	11.0	1.9	0.0	4.0	11.0	1.9	0.0	6.0	10.0	2.28	1.0	4.0	11.0	1.9	0.0	6.0	10.0	2.28	1.0	6.0
1039	4.0	11.0	1.9	0.0	4.0	11.0	1.9	0.0	4.0	11.0	1.9	0.0	4.0	11.0	1.9	0.0	6.0	10.0	2.28	1.0	4.0	11.0	1.9	0.0	4.0	11.0	1.9	0.0	4.0	11.0	1.9	0.0	4.0	11.0	1.9	0.0	4.0	11.0	1.9	0.0	4.0	11.0	1.9	0.0	4.0	11.0	1.9	0.0	4.0
1040	4.0	11.0	1.9	0.0	4.0	11.0	1.9	0.0	4.0	11.0	1.9	0.0	4.0	11.0	1.9	0.0	4.0	11.0	1.9	0.0	4.0	11.0	1.9	0.0	4.0	11.0	1.9	0.0	4.0	11.0	1.9	0.0	4.0	11.0	1.9	0.0	6.0	10.0	2.28	1.0	4.0	11.0	1.9	0.0	6.0	10.0	2.28	1.0	4.0
1041	6.0	10.0	2.28	1.0	4.0	11.0	1.9	0.0	4.0	11.0	1.9	0.0	4.0	11.0	1.9	0.0	6.0	10.0	2.28	1.0	4.0	11.0	1.9	0.0	4.0	11.0	1.9	0.0	4.0	11.0	1.9	0.0	4.0	11.0	1.9	0.0	4.0	11.0	1.9	0.0	4.0	11.0	1.9	0.0	4.0	11.0	1.9	0.0	6.0
1042	4.0	11.0	1.9	0.0	6.0	10.0	2.28	1.0	6.0	10.0	2.28	1.0	6.0	10.0	2.28	1.0	6.0	10.0	2.28	1.0	4.0	11.0	1.9	0.0	4.0	11.0	1.9	0.0	4.0	11.0	1.9	0.0	4.0	11.0	1.9	0.0	4.0	11.0	1.9	0.0	4.0	11.0	1.9	0.0	6.0	10.0	2.28	1.0	4.0
1043	4.0	11.0	1.9	0.0	4.0	11.0	1.9	0.0	4.0	11.0	1.9	0.0	4.0	11.0	1.9	0.0	4.0	11.0	1.9	0.0	4.0	11.0	1.9	0.0	4.0	11.0	1.9	0.0	6.0	10.0	2.28	1.0	4.0	11.0	1.9	0.0	4.0	11.0	1.9	0.0	4.0	11.0	1.9	0.0	4.0	11.0	1.9	0.0	4.0
1044	4.0	11.0	1.9	0.0	4.0	11.0	1.9	0.0	4.0	11.0	1.9	0.0	4.0	11.0	1.9	0.0	6.0	10.0	2.28	1.0	6.0	10.0	2.28	1.0	6.0	10.0	2.28	1.0	4.0	11.0	1.9	0.0	4.0	11.0	1.9	0.0	4.0	11.0	1.9	0.0	4.0	11.0	1.9	0.0	6.0	10.0	2.28	1.0	4.0
1045	4.0	11.0	1.9	0.0	4.0	11.0	1.9	0.0	4.0	11.0	1.9	0.0	4.0	11.0	1.9	0.0	4.0	11.0	1.9	0.0	6.0	10.0	2.28	1.0	4.0	11.0	1.9	0.0	4.0	11.0	1.9	0.0	4.0	11.0	1.9	0.0	6.0	10.0	2.28	1.0	4.0	11.0	1.9	0.0	4.0	11.0	1.9	0.0	4.0
1046	4.0	11.0	1.9	0.0	4.0	11.0	1.9	0.0	4.0	11.0	1.9	0.0	4.0	11.0	1.9	0.0	6.0	10.0	2.28	1.0	4.0	11.0	1.9	0.0	6.0	10.0	2.28	1.0	4.0	11.0	1.9	0.0	4.0	11.0	1.9	0.0	4.0	11.0	1.9	0.0	4.0	11.0	1.9	0.0	4.0	11.0	1.9	0.0	4.0
1047	4.0	11.0	1.9	0.0	4.0	11.0	1.9	0.0	4.0	11.0	1.9	0.0	4.0	11.0	1.9	0.0	4.0	11.0	1.9	0.0	4.0	11.0	1.9	0.0	4.0	11.0	1.9	0.0	4.0	11.0	1.9	0.0	4.0	11.0	1.9	0.0	6.0	10.0	2.28	1.0	6.0	10.0	2.28	1.0	6.0	10.0	2.28	1.0	4.0
1048	4.0	11.0	1.9	0.0	4.0	11.0	1.9	0.0	4.0	11.0	1.9	0.0	4.0	11.0	1.9	0.0	4.0	11.0	1.9	0.0	4.0	11.0	1.9	0.0	4.0	11.0	1.9	0.0	4.0	11.0	1.9	0.0	6.0	10.0	2.28	1.0	6.0	10.0	2.28	1.0	4.0	11.0	1.9	0.0	4.0	11.0	1.9	0.0	6.0
1049	4.0	11.0	1.9	0.0	4.0	11.0	1.9	0.0	4.0	11.0	1.9	0.0	4.0	11.0	1.9	0.0	4.0	11.0	1.9	0.0	4.0	11.0	1.9	0.0	4.0	11.0	1.9	0.0	6.0	10.0	2.28	1.0	4.0	11.0	1.9	0.0	4.0	11.0	1.9	0.0	4.0	11.0	1.9	0.0	6.0	10.0	2.28	1.0	4.0
1050	4.0	11.0	1.9	0.0	4.0	11.0	1.9	0.0	4.0	11.0	1.9	0.0	6.0	10.0	2.28	1.0	4.0	11.0	1.9	0.0	6.0	10.0	2.28	1.0	4.0	11.0	1.9	0.0	4.0	11.0	1.9	0.0	4.0	11.0	1.9	0.0	6.0	10.0	2.28	1.0	4.0	11.0	1.9	0.0	4.0	11.0	1.9	0.0	4.0
1051	4.0	11.0	1.9	0.0	4.0	11.0	1.9	0.0	6.0	10.0	2.28	1.0	4.0	11.0	1.9	0.0	4.0	11.0	1.9	0.0	6.0	10.0	2.28	1.0	4.0	11.0	1.9	0.0	4.0	11.0	1.9	0.0	4.0	11.0	1.9	0.0	6.0	10.0	2.28	1.0	4.0	11.0	1.9	0.0	4.0	11.0	1.9	0.0	4.0
1052	6.0	10.0	2.28	1.0	4.0	11.0	1.9	0.0	4.0	11.0	1.9	0.0	4.0	11.0	1.9	0.0	4.0	11.0	1.9	0.0	6.0	10.0	2.28	1.0	4.0	11.0	1.9	0.0	6.0	10.0	2.28	1.0	6.0	10.0	2.28	1.0	4.0	11.0	1.9	0.0	4.0	11.0	1.9	0.0	4.0	11.0	1.9	0.0	4.0
1053	4.0	11.0	1.9	0.0	4.0	11.0	1.9	0.0	4.0	11.0	1.9	0.0	6.0	10.0	2.28	1.0	6.0	10.0	2.28	1.0	4.0	11.0	1.9	0.0	4.0	11.0	1.9	0.0	4.0	11.0	1.9	0.0	4.0	11.0	1.9	0.0	4.0	11.0	1.9	0.0	4.0	11.0	1.9	0.0	4.0	11.0	1.9	0.0	4.0
1054	4.0	11.0	1.9	0.0	4.0	11.0	1.9	0.0	4.0	11.0	1.9	0.0	4.0	11.0	1.9	0.0	4.0	11.0	1.9	0.0	4.0	11.0	1.9	0.0	6.0	10.0	2.28	1.0	4.0	11.0	1.9	0.0	4.0	11.0	1.9	0.0	4.0	11.0	1.9	0.0	6.0	10.0	2.28	1.0	4.0	11.0	1.9	0.0	6.0
1055	6.0	10.0	2.28	1.0	4.0	11.0	1.9	0.0	4.0	11.0	1.9	0.0	6.0	10.0	2.28	1.0	4.0	11.0	1.9	0.0	4.0	11.0	1.9	0.0	4.0	11.0	1.9	0.0	4.0	11.0	1.9	0.0	4.0	11.0	1.9	0.0	6.0	10.0	2.28	1.0	4.0	11.0	1.9	0.0	4.0	11.0	1.9	0.0	6.0
1056	4.0	11.0	1.9	0.0	4.0	11.0	1.9	0.0	4.0	11.0	1.9	0.0	4.0	11.0	1.9	0.0	6.0	10.0	2.28	1.0	4.0	11.0	1.9	0.0	6.0	10.0	2.28	1.0	4.0	11.0	1.9	0.0	6.0	10.0	2.28	1.0	4.0	11.0	1.9	0.0	4.0	11.0	1.9	0.0	4.0	11.0	1.9	0.0	4.0
1057	4.0	11.0	1.9	0.0	4.0	11.0	1.9	0.0	4.0	11.0	1.9	0.0	4.0	11.0	1.9	0.0	6.0	10.0	2.28	1.0	6.0	10.0	2.28	1.0	4.0	11.0	1.9	0.0	4.0	11.0	1.9	0.0	4.0	11.0	1.9	0.0	4.0	11.0	1.9	0.0	4.0	11.0	1.9	0.0	4.0	11.0	1.9	0.0	4.0
1058	6.0	10.0	2.28	1.0	4.0	11.0	1.9	0.0	4.0	11.0	1.9	0.0	6.0	10.0	2.28	1.0	4.0	11.0	1.9	0.0	4.0	11.0	1.9	0.0	6.0	10.0	2.28	1.0	4.0	11.0	1.9	0.0	4.0	11.0	1.9	0.0	4.0	11.0	1.9	0.0	4.0	11.0	1.9	0.0	6.0	10.0	2.28	1.0	4.0
1059	6.0	10.0	2.28	1.0	4.0	11.0	1.9	0.0	4.0	11.0	1.9	0.0	4.0	11.0	1.9	0.0	4.0	11.0	1.9	0.0	4.0	11.0	1.9	0.0	4.0	11.0	1.9	0.0	4.0	11.0	1.9	0.0	4.0	11.0	1.9	0.0	4.0	11.0	1.9	0.0	4.0	11.0	1.9	0.0	4.0	11.0	1.9	0.0	4.0
1060	6.0	10.0	2.28	1.0	6.0	10.0	2.28	1.0	4.0	11.0	1.9	0.0	4.0	11.0	1.9	0.0	4.0	11.0	1.9	0.0	4.0	11.0	1.9	0.0	4.0	11.0	1.9	0.0	6.0	10.0	2.28	1.0	4.0	11.0	1.9	0.0	4.0	11.0	1.9	0.0	4.0	11.0	1.9	0.0	4.0	11.0	1.9	0.0	4.0
1061	4.0	11.0	1.9	0.0	6.0	10.0	2.28	1.0	4.0	11.0	1.9	0.0	4.0	11.0	1.9	0.0	4.0	11.0	1.9	0.0	4.0	11.0	1.9	0.0	4.0	11.0	1.9	0.0	4.0	11.0	1.9	0.0	4.0	11.0	1.9	0.0	4.0	11.0	1.9	0.0	4.0	11.0	1.9	0.0	6.0	10.0	2.28	1.0	4.0
1062	4.0	11.0	1.9	0.0	6.0	10.0	2.28	1.0	4.0	11.0	1.9	0.0	4.0	11.0	1.9	0.0	6.0	10.0	2.28	1.0	4.0	11.0	1.9	0.0	4.0	11.0	1.9	0.0	4.0	11.0	1.9	0.0	4.0	11.0	1.9	0.0	4.0	11.0	1.9	0.0	6.0	10.0	2.28	1.0	4.0	11.0	1.9	0.0	4.0
1063	6.0	10.0	2.28	1.0	6.0	10.0	2.28	1.0	4.0	11.0	1.9	0.0	4.0	11.0	1.9	0.0	4.0	11.0	1.9	0.0	4.0	11.0	1.9	0.0	4.0	11.0	1.9	0.0	4.0	11.0	1.9	0.0	4.0	11.0	1.9	0.0	4.0	11.0	1.9	0.0	4.0	11.0	1.9	0.0	6.0	10.0	2.28	1.0	6.0
1064	4.0	11.0	1.9	0.0	4.0	11.0	1.9	0.0	4.0	11.0	1.9	0.0	4.0	11.0	1.9	0.0	4.0	11.0	1.9	0.0	4.0	11.0	1.9	0.0	6.0	10.0	2.28	1.0	4.0	11.0	1.9	0.0	4.0	11.0	1.9	0.0	4.0	11.0	1.9	0.0	4.0	11.0	1.9	0.0	6.0	10.0	2.28	1.0	6.0
1065	6.0	10.0	2.28	1.0	4.0	11.0	1.9	0.0	4.0	11.0	1.9	0.0	6.0	10.0	2.28	1.0	4.0	11.0	1.9	0.0	4.0	11.0	1.9	0.0	4.0	11.0	1.9	0.0	4.0	11.0	1.9	0.0	4.0	11.0	1.9	0.0	6.0	10.0	2.28	1.0	4.0	11.0	1.9	0.0	4.0	11.0	1.9	0.0	4.0
1066	4.0	11.0	1.9	0.0	4.0	11.0	1.9	0.0	6.0	10.0	2.28	1.0	4.0	11.0	1.9	0.0	4.0	11.0	1.9	0.0	4.0	11.0	1.9	0.0	6.0	10.0	2.28	1.0	4.0	11.0	1.9	0.0	4.0	11.0	1.9	0.0	4.0	11.0	1.9	0.0	4.0	11.0	1.9	0.0	4.0	11.0	1.9	0.0	4.0
1067	4.0	11.0	1.9	0.0	6.0	10.0	2.28	1.0	4.0	11.0	1.9	0.0	4.0	11.0	1.9	0.0	6.0	10.0	2.28	1.0	6.0	10.0	2.28	1.0	4.0	11.0	1.9	0.0	4.0	11.0	1.9	0.0	4.0	11.0	1.9	0.0	4.0	11.0	1.9	0.0	6.0	10.0	2.28	1.0	4.0	11.0	1.9	0.0	6.0
1068	4.0	11.0	1.9	0.0	4.0	11.0	1.9	0.0	6.0	10.0	2.28	1.0	6.0	10.0	2.28	1.0	4.0	11.0	1.9	0.0	6.0	10.0	2.28	1.0	4.0	11.0	1.9	0.0	4.0	11.0	1.9	0.0	4.0	11.0	1.9	0.0	4.0	11.0	1.9	0.0	4.0	11.0	1.9	0.0	4.0	11.0	1.9	0.0	4.0
1069	4.0	11.0	1.9	0.0	6.0	10.0	2.28	1.0	6.0	10.0	2.28	1.0	6.0	10.0	2.28	1.0	6.0	10.0	2.28	1.0	4.0	11.0	1.9	0.0	4.0	11.0	1.9	0.0	6.0	10.0	2.28	1.0	4.0	11.0	1.9	0.0	4.0	11.0	1.9	0.0	4.0	11.0	1.9	0.0	4.0	11.0	1.9	0.0	4.0
1070	4.0	11.0	1.9	0.0	4.0	11.0	1.9	0.0	4.0	11.0	1.9	0.0	6.0	10.0	2.28	1.0	4.0	11.0	1.9	0.0	4.0	11.0	1.9	0.0	6.0	10.0	2.28	1.0	4.0	11.0	1.9	0.0	6.0	10.0	2.28	1.0	4.0	11.0	1.9	0.0	4.0	11.0	1.9	0.0	4.0	11.0	1.9	0.0	4.0
1071	4.0	11.0	1.9	0.0	4.0	11.0	1.9	0.0	4.0	11.0	1.9	0.0	4.0	11.0	1.9	0.0	4.0	11.0	1.9	0.0	4.0	11.0	1.9	0.0	6.0	10.0	2.28	1.0	6.0	10.0	2.28	1.0	4.0	11.0	1.9	0.0	6.0	10.0	2.28	1.0	4.0	11.0	1.9	0.0	4.0	11.0	1.9	0.0	4.0
1072	6.0	10.0	2.28	1.0	4.0	11.0	1.9	0.0	4.0	11.0	1.9	0.0	4.0	11.0	1.9	0.0	4.0	11.0	1.9	0.0	4.0	11.0	1.9	0.0	4.0	11.0	1.9	0.0	4.0	11.0	1.9	0.0	6.0	10.0	2.28	1.0	4.0	11.0	1.9	0.0	4.0	11.0	1.9	0.0	6.0	10.0	2.28	1.0	4.0
1073	6.0	10.0	2.28	1.0	4.0	11.0	1.9	0.0	4.0	11.0	1.9	0.0	4.0	11.0	1.9	0.0	6.0	10.0	2.28	1.0	4.0	11.0	1.9	0.0	4.0	11.0	1.9	0.0	4.0	11.0	1.9	0.0	6.0	10.0	2.28	1.0	4.0	11.0	1.9	0.0	4.0	11.0	1.9	0.0	4.0	11.0	1.9	0.0	4.0
1074	4.0	11.0	1.9	0.0	6.0	10.0	2.28	1.0	4.0	11.0	1.9	0.0	4.0	11.0	1.9	0.0	4.0	11.0	1.9	0.0	4.0	11.0	1.9	0.0	6.0	10.0	2.28	1.0	4.0	11.0	1.9	0.0	4.0	11.0	1.9	0.0	4.0	11.0	1.9	0.0	6.0	10.0	2.28	1.0	4.0	11.0	1.9	0.0	4.0
1075	4.0	11.0	1.9	0.0	4.0	11.0	1.9	0.0	4.0	11.0	1.9	0.0	6.0	10.0	2.28	1.0	4.0	11.0	1.9	0.0	6.0	10.0	2.28	1.0	4.0	11.0	1.9	0.0	4.0	11.0	1.9	0.0	4.0	11.0	1.9	0.0	6.0	10.0	2.28	1.0	4.0	11.0	1.9	0.0	6.0	10.0	2.28	1.0	4.0
1076	6.0	10.0	2.28	1.0	4.0	11.0	1.9	0.0	6.0	10.0	2.28	1.0	6.0	10.0	2.28	1.0	4.0	11.0	1.9	0.0	6.0	10.0	2.28	1.0	4.0	11.0	1.9	0.0	4.0	11.0	1.9	0.0	4.0	11.0	1.9	0.0	4.0	11.0	1.9	0.0	6.0	10.0	2.28	1.0	4.0	11.0	1.9	0.0	4.0
1077	4.0	11.0	1.9	0.0	6.0	10.0	2.28	1.0	4.0	11.0	1.9	0.0	4.0	11.0	1.9	0.0	4.0	11.0	1.9	0.0	6.0	10.0	2.28	1.0	6.0	10.0	2.28	1.0	4.0	11.0	1.9	0.0	4.0	11.0	1.9	0.0	4.0	11.0	1.9	0.0	4.0	11.0	1.9	0.0	4.0	11.0	1.9	0.0	4.0
1078	4.0	11.0	1.9	0.0	4.0	11.0	1.9	0.0	4.0	11.0	1.9	0.0	4.0	11.0	1.9	0.0	6.0	10.0	2.28	1.0	4.0	11.0	1.9	0.0	4.0	11.0	1.9	0.0	6.0	10.0	2.28	1.0	4.0	11.0	1.9	0.0	4.0	11.0	1.9	0.0	4.0	11.0	1.9	0.0	4.0	11.0	1.9	0.0	4.0
1079	6.0	10.0	2.28	1.0	4.0	11.0	1.9	0.0	4.0	11.0	1.9	0.0	4.0	11.0	1.9	0.0	4.0	11.0	1.9	0.0	6.0	10.0	2.28	1.0	4.0	11.0	1.9	0.0	4.0	11.0	1.9	0.0	4.0	11.0	1.9	0.0	6.0	10.0	2.28	1.0	4.0	11.0	1.9	0.0	4.0	11.0	1.9	0.0	4.0
1080	4.0	11.0	1.9	0.0	4.0	11.0	1.9	0.0	4.0	11.0	1.9	0.0	4.0	11.0	1.9	0.0	4.0	11.0	1.9	0.0	6.0	10.0	2.28	1.0	4.0	11.0	1.9	0.0	4.0	11.0	1.9	0.0	4.0	11.0	1.9	0.0	4.0	11.0	1.9	0.0	4.0	11.0	1.9	0.0	4.0	11.0	1.9	0.0	4.0
1081	4.0	11.0	1.9	0.0	4.0	11.0	1.9	0.0	6.0	10.0	2.28	1.0	6.0	10.0	2.28	1.0	4.0	11.0	1.9	0.0	4.0	11.0	1.9	0.0	4.0	11.0	1.9	0.0	4.0	11.0	1.9	0.0	4.0	11.0	1.9	0.0	4.0	11.0	1.9	0.0	4.0	11.0	1.9	0.0	4.0	11.0	1.9	0.0	4.0
1082	4.0	11.0	1.9	0.0	4.0	11.0	1.9	0.0	6.0	10.0	2.28	1.0	6.0	10.0	2.28	1.0	4.0	11.0	1.9	0.0	4.0	11.0	1.9	0.0	4.0	11.0	1.9	0.0	4.0	11.0	1.9	0.0	4.0	11.0	1.9	0.0	6.0	10.0	2.28	1.0	4.0	11.0	1.9	0.0	4.0	11.0	1.9	0.0	4.0
1083	4.0	11.0	1.9	0.0	6.0	10.0	2.28	1.0	4.0	11.0	1.9	0.0	6.0	10.0	2.28	1.0	4.0	11.0	1.9	0.0	4.0	11.0	1.9	0.0	6.0	10.0	2.28	1.0	6.0	10.0	2.28	1.0	4.0	11.0	1.9	0.0	4.0	11.0	1.9	0.0	4.0	11.0	1.9	0.0	6.0	10.0	2.28	1.0	4.0
1084	4.0	11.0	1.9	0.0	4.0	11.0	1.9	0.0	6.0	10.0	2.28	1.0	4.0	11.0	1.9	0.0	4.0	11.0	1.9	0.0	4.0	11.0	1.9	0.0	6.0	10.0	2.28	1.0	4.0	11.0	1.9	0.0	4.0	11.0	1.9	0.0	4.0	11.0	1.9	0.0	4.0	11.0	1.9	0.0	4.0	11.0	1.9	0.0	6.0
1085	4.0	11.0	1.9	0.0	4.0	11.0	1.9	0.0	4.0	11.0	1.9	0.0	4.0	11.0	1.9	0.0	6.0	10.0	2.28	1.0	4.0	11.0	1.9	0.0	6.0	10.0	2.28	1.0	4.0	11.0	1.9	0.0	4.0	11.0	1.9	0.0	4.0	11.0	1.9	0.0	4.0	11.0	1.9	0.0	4.0	11.0	1.9	0.0	6.0
1086	4.0	11.0	1.9	0.0	4.0	11.0	1.9	0.0	4.0	11.0	1.9	0.0	4.0	11.0	1.9	0.0	6.0	10.0	2.28	1.0	4.0	11.0	1.9	0.0	6.0	10.0	2.28	1.0	4.0	11.0	1.9	0.0	4.0	11.0	1.9	0.0	6.0	10.0	2.28	1.0	4.0	11.0	1.9	0.0	6.0	10.0	2.28	1.0	4.0
1087	4.0	11.0	1.9	0.0	4.0	11.0	1.9	0.0	4.0	11.0	1.9	0.0	4.0	11.0	1.9	0.0	4.0	11.0	1.9	0.0	4.0	11.0	1.9	0.0	4.0	11.0	1.9	0.0	4.0	11.0	1.9	0.0	4.0	11.0	1.9	0.0	6.0	10.0	2.28	1.0	6.0	10.0	2.28	1.0	4.0	11.0	1.9	0.0	4.0
1088	6.0	10.0	2.28	1.0	4.0	11.0	1.9	0.0	4.0	11.0	1.9	0.0	4.0	11.0	1.9	0.0	4.0	11.0	1.9	0.0	6.0	10.0	2.28	1.0	4.0	11.0	1.9	0.0	6.0	10.0	2.28	1.0	4.0	11.0	1.9	0.0	6.0	10.0	2.28	1.0	6.0	10.0	2.28	1.0	6.0	10.0	2.28	1.0	4.0
1089	4.0	11.0	1.9	0.0	6.0	10.0	2.28	1.0	4.0	11.0	1.9	0.0	4.0	11.0	1.9	0.0	6.0	10.0	2.28	1.0	4.0	11.0	1.9	0.0	6.0	10.0	2.28	1.0	6.0	10.0	2.28	1.0	4.0	11.0	1.9	0.0	4.0	11.0	1.9	0.0	4.0	11.0	1.9	0.0	6.0	10.0	2.28	1.0	4.0
1090	4.0	11.0	1.9	0.0	6.0	10.0	2.28	1.0	6.0	10.0	2.28	1.0	4.0	11.0	1.9	0.0	4.0	11.0	1.9	0.0	6.0	10.0	2.28	1.0	4.0	11.0	1.9	0.0	6.0	10.0	2.28	1.0	4.0	11.0	1.9	0.0	4.0	11.0	1.9	0.0	6.0	10.0	2.28	1.0	6.0	10.0	2.28	1.0	4.0
1091	6.0	10.0	2.28	1.0	4.0	11.0	1.9	0.0	6.0	10.0	2.28	1.0	4.0	11.0	1.9	0.0	4.0	11.0	1.9	0.0	4.0	11.0	1.9	0.0	4.0	11.0	1.9	0.0	4.0	11.0	1.9	0.0	6.0	10.0	2.28	1.0	4.0	11.0	1.9	0.0	4.0	11.0	1.9	0.0	4.0	11.0	1.9	0.0	4.0
1092	4.0	11.0	1.9	0.0	4.0	11.0	1.9	0.0	4.0	11.0	1.9	0.0	4.0	11.0	1.9	0.0	4.0	11.0	1.9	0.0	4.0	11.0	1.9	0.0	6.0	10.0	2.28	1.0	4.0	11.0	1.9	0.0	6.0	10.0	2.28	1.0	4.0	11.0	1.9	0.0	4.0	11.0	1.9	0.0	4.0	11.0	1.9	0.0	4.0
1093	6.0	10.0	2.28	1.0	4.0	11.0	1.9	0.0	4.0	11.0	1.9	0.0	6.0	10.0	2.28	1.0	4.0	11.0	1.9	0.0	6.0	10.0	2.28	1.0	4.0	11.0	1.9	0.0	4.0	11.0	1.9	0.0	4.0	11.0	1.9	0.0	4.0	11.0	1.9	0.0	4.0	11.0	1.9	0.0	4.0	11.0	1.9	0.0	4.0
1094	4.0	11.0	1.9	0.0	4.0	11.0	1.9	0.0	6.0	10.0	2.28	1.0	4.0	11.0	1.9	0.0	4.0	11.0	1.9	0.0	4.0	11.0	1.9	0.0	4.0	11.0	1.9	0.0	4.0	11.0	1.9	0.0	4.0	11.0	1.9	0.0	6.0	10.0	2.28	1.0	6.0	10.0	2.28	1.0	4.0	11.0	1.9	0.0	4.0
1095	4.0	11.0	1.9	0.0	4.0	11.0	1.9	0.0	4.0	11.0	1.9	0.0	4.0	11.0	1.9	0.0	4.0	11.0	1.9	0.0	4.0	11.0	1.9	0.0	6.0	10.0	2.28	1.0	4.0	11.0	1.9	0.0	6.0	10.0	2.28	1.0	4.0	11.0	1.9	0.0	4.0	11.0	1.9	0.0	4.0	11.0	1.9	0.0	6.0
1096	4.0	11.0	1.9	0.0	4.0	11.0	1.9	0.0	4.0	11.0	1.9	0.0	4.0	11.0	1.9	0.0	6.0	10.0	2.28	1.0	4.0	11.0	1.9	0.0	4.0	11.0	1.9	0.0	4.0	11.0	1.9	0.0	4.0	11.0	1.9	0.0	4.0	11.0	1.9	0.0	4.0	11.0	1.9	0.0	6.0	10.0	2.28	1.0	4.0
1097	4.0	11.0	1.9	0.0	4.0	11.0	1.9	0.0	4.0	11.0	1.9	0.0	4.0	11.0	1.9	0.0	4.0	11.0	1.9	0.0	4.0	11.0	1.9	0.0	6.0	10.0	2.28	1.0	4.0	11.0	1.9	0.0	4.0	11.0	1.9	0.0	6.0	10.0	2.28	1.0	4.0	11.0	1.9	0.0	6.0	10.0	2.28	1.0	4.0
1098	4.0	11.0	1.9	0.0	4.0	11.0	1.9	0.0	6.0	10.0	2.28	1.0	4.0	11.0	1.9	0.0	6.0	10.0	2.28	1.0	4.0	11.0	1.9	0.0	4.0	11.0	1.9	0.0	4.0	11.0	1.9	0.0	6.0	10.0	2.28	1.0	4.0	11.0	1.9	0.0	4.0	11.0	1.9	0.0	4.0	11.0	1.9	0.0	4.0
1099	4.0	11.0	1.9	0.0	4.0	11.0	1.9	0.0	4.0	11.0	1.9	0.0	6.0	10.0	2.28	1.0	4.0	11.0	1.9	0.0	4.0	11.0	1.9	0.0	6.0	10.0	2.28	1.0	4.0	11.0	1.9	0.0	4.0	11.0	1.9	0.0	4.0	11.0	1.9	0.0	4.0	11.0	1.9	0.0	6.0	10.0	2.28	1.0	6.0
1100	4.0	11.0	1.9	0.0	4.0	11.0	1.9	0.0	6.0	10.0	2.28	1.0	4.0	11.0	1.9	0.0	6.0	10.0	2.28	1.0	4.0	11.0	1.9	0.0	4.0	11.0	1.9	0.0	4.0	11.0	1.9	0.0	4.0	11.0	1.9	0.0	4.0	11.0	1.9	0.0	4.0	11.0	1.9	0.0	4.0	11.0	1.9	0.0	6.0
1101	4.0	11.0	1.9	0.0	4.0	11.0	1.9	0.0	4.0	11.0	1.9	0.0	6.0	10.0	2.28	1.0	6.0	10.0	2.28	1.0	4.0	11.0	1.9	0.0	4.0	11.0	1.9	0.0	4.0	11.0	1.9	0.0	4.0	11.0	1.9	0.0	4.0	11.0	1.9	0.0	6.0	10.0	2.28	1.0	4.0	11.0	1.9	0.0	4.0
1102	4.0	11.0	1.9	0.0	4.0	11.0	1.9	0.0	4.0	11.0	1.9	0.0	6.0	10.0	2.28	1.0	4.0	11.0	1.9	0.0	4.0	11.0	1.9	0.0	6.0	10.0	2.28	1.0	6.0	10.0	2.28	1.0	4.0	11.0	1.9	0.0	4.0	11.0	1.9	0.0	4.0	11.0	1.9	0.0	4.0	11.0	1.9	0.0	4.0
1103	4.0	11.0	1.9	0.0	4.0	11.0	1.9	0.0	4.0	11.0	1.9	0.0	4.0	11.0	1.9	0.0	4.0	11.0	1.9	0.0	6.0	10.0	2.28	1.0	4.0	11.0	1.9	0.0	4.0	11.0	1.9	0.0	4.0	11.0	1.9	0.0	6.0	10.0	2.28	1.0	4.0	11.0	1.9	0.0	6.0	10.0	2.28	1.0	4.0
1104	4.0	11.0	1.9	0.0	6.0	10.0	2.28	1.0	4.0	11.0	1.9	0.0	4.0	11.0	1.9	0.0	4.0	11.0	1.9	0.0	4.0	11.0	1.9	0.0	4.0	11.0	1.9	0.0	4.0	11.0	1.9	0.0	6.0	10.0	2.28	1.0	4.0	11.0	1.9	0.0	4.0	11.0	1.9	0.0	4.0	11.0	1.9	0.0	4.0
1105	4.0	11.0	1.9	0.0	4.0	11.0	1.9	0.0	4.0	11.0	1.9	0.0	4.0	11.0	1.9	0.0	4.0	11.0	1.9	0.0	4.0	11.0	1.9	0.0	4.0	11.0	1.9	0.0	6.0	10.0	2.28	1.0	6.0	10.0	2.28	1.0	4.0	11.0	1.9	0.0	4.0	11.0	1.9	0.0	4.0	11.0	1.9	0.0	6.0
1106	4.0	11.0	1.9	0.0	4.0	11.0	1.9	0.0	6.0	10.0	2.28	1.0	6.0	10.0	2.28	1.0	4.0	11.0	1.9	0.0	4.0	11.0	1.9	0.0	4.0	11.0	1.9	0.0	4.0	11.0	1.9	0.0	6.0	10.0	2.28	1.0	4.0	11.0	1.9	0.0	6.0	10.0	2.28	1.0	4.0	11.0	1.9	0.0	6.0
1107	4.0	11.0	1.9	0.0	6.0	10.0	2.28	1.0	4.0	11.0	1.9	0.0	6.0	10.0	2.28	1.0	4.0	11.0	1.9	0.0	6.0	10.0	2.28	1.0	6.0	10.0	2.28	1.0	4.0	11.0	1.9	0.0	4.0	11.0	1.9	0.0	4.0	11.0	1.9	0.0	4.0	11.0	1.9	0.0	4.0	11.0	1.9	0.0	4.0
1108	6.0	10.0	2.28	1.0	4.0	11.0	1.9	0.0	4.0	11.0	1.9	0.0	6.0	10.0	2.28	1.0	6.0	10.0	2.28	1.0	4.0	11.0	1.9	0.0	4.0	11.0	1.9	0.0	4.0	11.0	1.9	0.0	4.0	11.0	1.9	0.0	4.0	11.0	1.9	0.0	4.0	11.0	1.9	0.0	4.0	11.0	1.9	0.0	4.0
1109	4.0	11.0	1.9	0.0	4.0	11.0	1.9	0.0	4.0	11.0	1.9	0.0	4.0	11.0	1.9	0.0	4.0	11.0	1.9	0.0	4.0	11.0	1.9	0.0	4.0	11.0	1.9	0.0	4.0	11.0	1.9	0.0	4.0	11.0	1.9	0.0	4.0	11.0	1.9	0.0	4.0	11.0	1.9	0.0	4.0	11.0	1.9	0.0	6.0
1110	4.0	11.0	1.9	0.0	4.0	11.0	1.9	0.0	4.0	11.0	1.9	0.0	4.0	11.0	1.9	0.0	6.0	10.0	2.28	1.0	4.0	11.0	1.9	0.0	4.0	11.0	1.9	0.0	4.0	11.0	1.9	0.0	6.0	10.0	2.28	1.0	6.0	10.0	2.28	1.0	4.0	11.0	1.9	0.0	6.0	10.0	2.28	1.0	4.0
1111	6.0	10.0	2.28	1.0	4.0	11.0	1.9	0.0	6.0	10.0	2.28	1.0	4.0	11.0	1.9	0.0	6.0	10.0	2.28	1.0	6.0	10.0	2.28	1.0	6.0	10.0	2.28	1.0	4.0	11.0	1.9	0.0	4.0	11.0	1.9	0.0	4.0	11.0	1.9	0.0	4.0	11.0	1.9	0.0	4.0	11.0	1.9	0.0	4.0
1112	6.0	10.0	2.28	1.0	4.0	11.0	1.9	0.0	4.0	11.0	1.9	0.0	4.0	11.0	1.9	0.0	4.0	11.0	1.9	0.0	4.0	11.0	1.9	0.0	4.0	11.0	1.9	0.0	4.0	11.0	1.9	0.0	6.0	10.0	2.28	1.0	6.0	10.0	2.28	1.0	4.0	11.0	1.9	0.0	4.0	11.0	1.9	0.0	4.0
1113	4.0	11.0	1.9	0.0	4.0	11.0	1.9	0.0	6.0	10.0	2.28	1.0	6.0	10.0	2.28	1.0	4.0	11.0	1.9	0.0	4.0	11.0	1.9	0.0	4.0	11.0	1.9	0.0	4.0	11.0	1.9	0.0	6.0	10.0	2.28	1.0	4.0	11.0	1.9	0.0	6.0	10.0	2.28	1.0	4.0	11.0	1.9	0.0	4.0
1114	4.0	11.0	1.9	0.0	6.0	10.0	2.28	1.0	4.0	11.0	1.9	0.0	4.0	11.0	1.9	0.0	6.0	10.0	2.28	1.0	4.0	11.0	1.9	0.0	6.0	10.0	2.28	1.0	4.0	11.0	1.9	0.0	4.0	11.0	1.9	0.0	4.0	11.0	1.9	0.0	4.0	11.0	1.9	0.0	4.0	11.0	1.9	0.0	4.0
1115	6.0	10.0	2.28	1.0	4.0	11.0	1.9	0.0	4.0	11.0	1.9	0.0	4.0	11.0	1.9	0.0	4.0	11.0	1.9	0.0	4.0	11.0	1.9	0.0	4.0	11.0	1.9	0.0	4.0	11.0	1.9	0.0	4.0	11.0	1.9	0.0	6.0	10.0	2.28	1.0	4.0	11.0	1.9	0.0	4.0	11.0	1.9	0.0	4.0
1116	4.0	11.0	1.9	0.0	4.0	11.0	1.9	0.0	6.0	10.0	2.28	1.0	4.0	11.0	1.9	0.0	4.0	11.0	1.9	0.0	4.0	11.0	1.9	0.0	6.0	10.0	2.28	1.0	6.0	10.0	2.28	1.0	4.0	11.0	1.9	0.0	6.0	10.0	2.28	1.0	4.0	11.0	1.9	0.0	6.0	10.0	2.28	1.0	4.0
1117	4.0	11.0	1.9	0.0	6.0	10.0	2.28	1.0	4.0	11.0	1.9	0.0	6.0	10.0	2.28	1.0	4.0	11.0	1.9	0.0	6.0	10.0	2.28	1.0	4.0	11.0	1.9	0.0	4.0	11.0	1.9	0.0	6.0	10.0	2.28	1.0	4.0	11.0	1.9	0.0	4.0	11.0	1.9	0.0	4.0	11.0	1.9	0.0	4.0
1118	4.0	11.0	1.9	0.0	4.0	11.0	1.9	0.0	6.0	10.0	2.28	1.0	4.0	11.0	1.9	0.0	6.0	10.0	2.28	1.0	4.0	11.0	1.9	0.0	4.0	11.0	1.9	0.0	6.0	10.0	2.28	1.0	4.0	11.0	1.9	0.0	4.0	11.0	1.9	0.0	4.0	11.0	1.9	0.0	6.0	10.0	2.28	1.0	4.0
1119	6.0	10.0	2.28	1.0	6.0	10.0	2.28	1.0	4.0	11.0	1.9	0.0	4.0	11.0	1.9	0.0	4.0	11.0	1.9	0.0	4.0	11.0	1.9	0.0	4.0	11.0	1.9	0.0	6.0	10.0	2.28	1.0	6.0	10.0	2.28	1.0	4.0	11.0	1.9	0.0	4.0	11.0	1.9	0.0	6.0	10.0	2.28	1.0	4.0
1120	4.0	11.0	1.9	0.0	4.0	11.0	1.9	0.0	4.0	11.0	1.9	0.0	6.0	10.0	2.28	1.0	4.0	11.0	1.9	0.0	4.0	11.0	1.9	0.0	4.0	11.0	1.9	0.0	4.0	11.0	1.9	0.0	4.0	11.0	1.9	0.0	4.0	11.0	1.9	0.0	4.0	11.0	1.9	0.0	4.0	11.0	1.9	0.0	6.0
1121	4.0	11.0	1.9	0.0	4.0	11.0	1.9	0.0	6.0	10.0	2.28	1.0	6.0	10.0	2.28	1.0	4.0	11.0	1.9	0.0	4.0	11.0	1.9	0.0	4.0	11.0	1.9	0.0	4.0	11.0	1.9	0.0	4.0	11.0	1.9	0.0	4.0	11.0	1.9	0.0	4.0	11.0	1.9	0.0	4.0	11.0	1.9	0.0	6.0
1122	4.0	11.0	1.9	0.0	4.0	11.0	1.9	0.0	4.0	11.0	1.9	0.0	4.0	11.0	1.9	0.0	4.0	11.0	1.9	0.0	4.0	11.0	1.9	0.0	6.0	10.0	2.28	1.0	4.0	11.0	1.9	0.0	4.0	11.0	1.9	0.0	6.0	10.0	2.28	1.0	6.0	10.0	2.28	1.0	4.0	11.0	1.9	0.0	4.0
1123	4.0	11.0	1.9	0.0	4.0	11.0	1.9	0.0	6.0	10.0	2.28	1.0	4.0	11.0	1.9	0.0	4.0	11.0	1.9	0.0	4.0	11.0	1.9	0.0	4.0	11.0	1.9	0.0	6.0	10.0	2.28	1.0	4.0	11.0	1.9	0.0	4.0	11.0	1.9	0.0	4.0	11.0	1.9	0.0	4.0	11.0	1.9	0.0	4.0
1124	4.0	11.0	1.9	0.0	4.0	11.0	1.9	0.0	4.0	11.0	1.9	0.0	4.0	11.0	1.9	0.0	4.0	11.0	1.9	0.0	4.0	11.0	1.9	0.0	4.0	11.0	1.9	0.0	6.0	10.0	2.28	1.0	4.0	11.0	1.9	0.0	4.0	11.0	1.9	0.0	4.0	11.0	1.9	0.0	4.0	11.0	1.9	0.0	6.0
1125	4.0	11.0	1.9	0.0	4.0	11.0	1.9	0.0	4.0	11.0	1.9	0.0	6.0	10.0	2.28	1.0	4.0	11.0	1.9	0.0	4.0	11.0	1.9	0.0	6.0	10.0	2.28	1.0	4.0	11.0	1.9	0.0	4.0	11.0	1.9	0.0	4.0	11.0	1.9	0.0	4.0	11.0	1.9	0.0	6.0	10.0	2.28	1.0	4.0
1126	4.0	11.0	1.9	0.0	4.0	11.0	1.9	0.0	4.0	11.0	1.9	0.0	4.0	11.0	1.9	0.0	4.0	11.0	1.9	0.0	4.0	11.0	1.9	0.0	4.0	11.0	1.9	0.0	4.0	11.0	1.9	0.0	4.0	11.0	1.9	0.0	4.0	11.0	1.9	0.0	4.0	11.0	1.9	0.0	6.0	10.0	2.28	1.0	6.0
1127	6.0	10.0	2.28	1.0	6.0	10.0	2.28	1.0	6.0	10.0	2.28	1.0	4.0	11.0	1.9	0.0	6.0	10.0	2.28	1.0	4.0	11.0	1.9	0.0	4.0	11.0	1.9	0.0	4.0	11.0	1.9	0.0	4.0	11.0	1.9	0.0	4.0	11.0	1.9	0.0	4.0	11.0	1.9	0.0	4.0	11.0	1.9	0.0	4.0
1128	6.0	10.0	2.28	1.0	6.0	10.0	2.28	1.0	4.0	11.0	1.9	0.0	4.0	11.0	1.9	0.0	4.0	11.0	1.9	0.0	4.0	11.0	1.9	0.0	4.0	11.0	1.9	0.0	4.0	11.0	1.9	0.0	4.0	11.0	1.9	0.0	6.0	10.0	2.28	1.0	4.0	11.0	1.9	0.0	6.0	10.0	2.28	1.0	4.0
1129	4.0	11.0	1.9	0.0	4.0	11.0	1.9	0.0	4.0	11.0	1.9	0.0	4.0	11.0	1.9	0.0	4.0	11.0	1.9	0.0	4.0	11.0	1.9	0.0	4.0	11.0	1.9	0.0	4.0	11.0	1.9	0.0	4.0	11.0	1.9	0.0	6.0	10.0	2.28	1.0	4.0	11.0	1.9	0.0	6.0	10.0	2.28	1.0	6.0
1130	4.0	11.0	1.9	0.0	6.0	10.0	2.28	1.0	4.0	11.0	1.9	0.0	4.0	11.0	1.9	0.0	4.0	11.0	1.9	0.0	4.0	11.0	1.9	0.0	4.0	11.0	1.9	0.0	4.0	11.0	1.9	0.0	4.0	11.0	1.9	0.0	4.0	11.0	1.9	0.0	4.0	11.0	1.9	0.0	4.0	11.0	1.9	0.0	6.0
1131	4.0	11.0	1.9	0.0	4.0	11.0	1.9	0.0	6.0	10.0	2.28	1.0	4.0	11.0	1.9	0.0	6.0	10.0	2.28	1.0	4.0	11.0	1.9	0.0	4.0	11.0	1.9	0.0	4.0	11.0	1.9	0.0	4.0	11.0	1.9	0.0	4.0	11.0	1.9	0.0	6.0	10.0	2.28	1.0	4.0	11.0	1.9	0.0	4.0
1132	4.0	11.0	1.9	0.0	4.0	11.0	1.9	0.0	4.0	11.0	1.9	0.0	4.0	11.0	1.9	0.0	4.0	11.0	1.9	0.0	4.0	11.0	1.9	0.0	6.0	10.0	2.28	1.0	4.0	11.0	1.9	0.0	4.0	11.0	1.9	0.0	6.0	10.0	2.28	1.0	4.0	11.0	1.9	0.0	4.0	11.0	1.9	0.0	4.0
1133	4.0	11.0	1.9	0.0	6.0	10.0	2.28	1.0	4.0	11.0	1.9	0.0	6.0	10.0	2.28	1.0	4.0	11.0	1.9	0.0	4.0	11.0	1.9	0.0	6.0	10.0	2.28	1.0	4.0	11.0	1.9	0.0	4.0	11.0	1.9	0.0	6.0	10.0	2.28	1.0	4.0	11.0	1.9	0.0	4.0	11.0	1.9	0.0	4.0
1134	4.0	11.0	1.9	0.0	6.0	10.0	2.28	1.0	4.0	11.0	1.9	0.0	4.0	11.0	1.9	0.0	4.0	11.0	1.9	0.0	4.0	11.0	1.9	0.0	6.0	10.0	2.28	1.0	4.0	11.0	1.9	0.0	4.0	11.0	1.9	0.0	4.0	11.0	1.9	0.0	4.0	11.0	1.9	0.0	6.0	10.0	2.28	1.0	4.0
1135	4.0	11.0	1.9	0.0	4.0	11.0	1.9	0.0	4.0	11.0	1.9	0.0	4.0	11.0	1.9	0.0	4.0	11.0	1.9	0.0	6.0	10.0	2.28	1.0	4.0	11.0	1.9	0.0	6.0	10.0	2.28	1.0	4.0	11.0	1.9	0.0	6.0	10.0	2.28	1.0	6.0	10.0	2.28	1.0	4.0	11.0	1.9	0.0	6.0
1136	4.0	11.0	1.9	0.0	4.0	11.0	1.9	0.0	4.0	11.0	1.9	0.0	4.0	11.0	1.9	0.0	6.0	10.0	2.28	1.0	4.0	11.0	1.9	0.0	4.0	11.0	1.9	0.0	4.0	11.0	1.9	0.0	6.0	10.0	2.28	1.0	4.0	11.0	1.9	0.0	6.0	10.0	2.28	1.0	4.0	11.0	1.9	0.0	6.0
1137	4.0	11.0	1.9	0.0	6.0	10.0	2.28	1.0	6.0	10.0	2.28	1.0	4.0	11.0	1.9	0.0	6.0	10.0	2.28	1.0	4.0	11.0	1.9	0.0	4.0	11.0	1.9	0.0	4.0	11.0	1.9	0.0	4.0	11.0	1.9	0.0	4.0	11.0	1.9	0.0	6.0	10.0	2.28	1.0	4.0	11.0	1.9	0.0	4.0
1138	4.0	11.0	1.9	0.0	4.0	11.0	1.9	0.0	4.0	11.0	1.9	0.0	4.0	11.0	1.9	0.0	6.0	10.0	2.28	1.0	4.0	11.0	1.9	0.0	6.0	10.0	2.28	1.0	6.0	10.0	2.28	1.0	4.0	11.0	1.9	0.0	4.0	11.0	1.9	0.0	4.0	11.0	1.9	0.0	4.0	11.0	1.9	0.0	6.0
1139	4.0	11.0	1.9	0.0	6.0	10.0	2.28	1.0	6.0	10.0	2.28	1.0	4.0	11.0	1.9	0.0	4.0	11.0	1.9	0.0	4.0	11.0	1.9	0.0	4.0	11.0	1.9	0.0	6.0	10.0	2.28	1.0	4.0	11.0	1.9	0.0	4.0	11.0	1.9	0.0	4.0	11.0	1.9	0.0	4.0	11.0	1.9	0.0	4.0
1140	4.0	11.0	1.9	0.0	6.0	10.0	2.28	1.0	4.0	11.0	1.9	0.0	4.0	11.0	1.9	0.0	4.0	11.0	1.9	0.0	6.0	10.0	2.28	1.0	6.0	10.0	2.28	1.0	4.0	11.0	1.9	0.0	4.0	11.0	1.9	0.0	4.0	11.0	1.9	0.0	4.0	11.0	1.9	0.0	4.0	11.0	1.9	0.0	6.0
1141	4.0	11.0	1.9	0.0	4.0	11.0	1.9	0.0	4.0	11.0	1.9	0.0	6.0	10.0	2.28	1.0	4.0	11.0	1.9	0.0	4.0	11.0	1.9	0.0	4.0	11.0	1.9	0.0	4.0	11.0	1.9	0.0	6.0	10.0	2.28	1.0	4.0	11.0	1.9	0.0	4.0	11.0	1.9	0.0	6.0	10.0	2.28	1.0	4.0
1142	4.0	11.0	1.9	0.0	4.0	11.0	1.9	0.0	4.0	11.0	1.9	0.0	6.0	10.0	2.28	1.0	6.0	10.0	2.28	1.0	4.0	11.0	1.9	0.0	6.0	10.0	2.28	1.0	4.0	11.0	1.9	0.0	4.0	11.0	1.9	0.0	4.0	11.0	1.9	0.0	4.0	11.0	1.9	0.0	4.0	11.0	1.9	0.0	4.0
1143	4.0	11.0	1.9	0.0	4.0	11.0	1.9	0.0	4.0	11.0	1.9	0.0	4.0	11.0	1.9	0.0	4.0	11.0	1.9	0.0	6.0	10.0	2.28	1.0	6.0	10.0	2.28	1.0	4.0	11.0	1.9	0.0	4.0	11.0	1.9	0.0	6.0	10.0	2.28	1.0	4.0	11.0	1.9	0.0	4.0	11.0	1.9	0.0	4.0
1144	6.0	10.0	2.28	1.0	4.0	11.0	1.9	0.0	4.0	11.0	1.9	0.0	6.0	10.0	2.28	1.0	4.0	11.0	1.9	0.0	4.0	11.0	1.9	0.0	4.0	11.0	1.9	0.0	4.0	11.0	1.9	0.0	4.0	11.0	1.9	0.0	4.0	11.0	1.9	0.0	4.0	11.0	1.9	0.0	4.0	11.0	1.9	0.0	4.0
1145	4.0	11.0	1.9	0.0	4.0	11.0	1.9	0.0	4.0	11.0	1.9	0.0	4.0	11.0	1.9	0.0	4.0	11.0	1.9	0.0	6.0	10.0	2.28	1.0	4.0	11.0	1.9	0.0	4.0	11.0	1.9	0.0	4.0	11.0	1.9	0.0	4.0	11.0	1.9	0.0	6.0	10.0	2.28	1.0	4.0	11.0	1.9	0.0	4.0
1146	4.0	11.0	1.9	0.0	4.0	11.0	1.9	0.0	4.0	11.0	1.9	0.0	4.0	11.0	1.9	0.0	4.0	11.0	1.9	0.0	4.0	11.0	1.9	0.0	6.0	10.0	2.28	1.0	4.0	11.0	1.9	0.0	4.0	11.0	1.9	0.0	4.0	11.0	1.9	0.0	6.0	10.0	2.28	1.0	4.0	11.0	1.9	0.0	4.0
1147	4.0	11.0	1.9	0.0	4.0	11.0	1.9	0.0	6.0	10.0	2.28	1.0	4.0	11.0	1.9	0.0	6.0	10.0	2.28	1.0	4.0	11.0	1.9	0.0	6.0	10.0	2.28	1.0	4.0	11.0	1.9	0.0	6.0	10.0	2.28	1.0	4.0	11.0	1.9	0.0	6.0	10.0	2.28	1.0	4.0	11.0	1.9	0.0	4.0
1148	4.0	11.0	1.9	0.0	4.0	11.0	1.9	0.0	4.0	11.0	1.9	0.0	4.0	11.0	1.9	0.0	4.0	11.0	1.9	0.0	4.0	11.0	1.9	0.0	4.0	11.0	1.9	0.0	6.0	10.0	2.28	1.0	4.0	11.0	1.9	0.0	4.0	11.0	1.9	0.0	6.0	10.0	2.28	1.0	4.0	11.0	1.9	0.0	4.0
1149	6.0	10.0	2.28	1.0	6.0	10.0	2.28	1.0	4.0	11.0	1.9	0.0	4.0	11.0	1.9	0.0	4.0	11.0	1.9	0.0	4.0	11.0	1.9	0.0	4.0	11.0	1.9	0.0	4.0	11.0	1.9	0.0	4.0	11.0	1.9	0.0	4.0	11.0	1.9	0.0	6.0	10.0	2.28	1.0	4.0	11.0	1.9	0.0	4.0
1150	4.0	11.0	1.9	0.0	4.0	11.0	1.9	0.0	4.0	11.0	1.9	0.0	4.0	11.0	1.9	0.0	6.0	10.0	2.28	1.0	4.0	11.0	1.9	0.0	6.0	10.0	2.28	1.0	6.0	10.0	2.28	1.0	4.0	11.0	1.9	0.0	4.0	11.0	1.9	0.0	4.0	11.0	1.9	0.0	4.0	11.0	1.9	0.0	4.0
1151	4.0	11.0	1.9	0.0	6.0	10.0	2.28	1.0	4.0	11.0	1.9	0.0	4.0	11.0	1.9	0.0	4.0	11.0	1.9	0.0	6.0	10.0	2.28	1.0	4.0	11.0	1.9	0.0	4.0	11.0	1.9	0.0	4.0	11.0	1.9	0.0	4.0	11.0	1.9	0.0	4.0	11.0	1.9	0.0	6.0	10.0	2.28	1.0	4.0
1152	6.0	10.0	2.28	1.0	4.0	11.0	1.9	0.0	4.0	11.0	1.9	0.0	4.0	11.0	1.9	0.0	4.0	11.0	1.9	0.0	4.0	11.0	1.9	0.0	4.0	11.0	1.9	0.0	4.0	11.0	1.9	0.0	4.0	11.0	1.9	0.0	4.0	11.0	1.9	0.0	4.0	11.0	1.9	0.0	6.0	10.0	2.28	1.0	6.0
1153	6.0	10.0	2.28	1.0	6.0	10.0	2.28	1.0	4.0	11.0	1.9	0.0	6.0	10.0	2.28	1.0	4.0	11.0	1.9	0.0	4.0	11.0	1.9	0.0	4.0	11.0	1.9	0.0	4.0	11.0	1.9	0.0	4.0	11.0	1.9	0.0	4.0	11.0	1.9	0.0	4.0	11.0	1.9	0.0	4.0	11.0	1.9	0.0	4.0
1154	6.0	10.0	2.28	1.0	6.0	10.0	2.28	1.0	4.0	11.0	1.9	0.0	6.0	10.0	2.28	1.0	4.0	11.0	1.9	0.0	6.0	10.0	2.28	1.0	4.0	11.0	1.9	0.0	4.0	11.0	1.9	0.0	6.0	10.0	2.28	1.0	4.0	11.0	1.9	0.0	4.0	11.0	1.9	0.0	4.0	11.0	1.9	0.0	6.0
1155	4.0	11.0	1.9	0.0	4.0	11.0	1.9	0.0	4.0	11.0	1.9	0.0	4.0	11.0	1.9	0.0	6.0	10.0	2.28	1.0	6.0	10.0	2.28	1.0	4.0	11.0	1.9	0.0	4.0	11.0	1.9	0.0	4.0	11.0	1.9	0.0	4.0	11.0	1.9	0.0	6.0	10.0	2.28	1.0	4.0	11.0	1.9	0.0	4.0
1156	4.0	11.0	1.9	0.0	4.0	11.0	1.9	0.0	4.0	11.0	1.9	0.0	4.0	11.0	1.9	0.0	4.0	11.0	1.9	0.0	4.0	11.0	1.9	0.0	4.0	11.0	1.9	0.0	4.0	11.0	1.9	0.0	6.0	10.0	2.28	1.0	4.0	11.0	1.9	0.0	4.0	11.0	1.9	0.0	4.0	11.0	1.9	0.0	6.0
1157	6.0	10.0	2.28	1.0	6.0	10.0	2.28	1.0	4.0	11.0	1.9	0.0	6.0	10.0	2.28	1.0	4.0	11.0	1.9	0.0	4.0	11.0	1.9	0.0	4.0	11.0	1.9	0.0	4.0	11.0	1.9	0.0	6.0	10.0	2.28	1.0	4.0	11.0	1.9	0.0	4.0	11.0	1.9	0.0	4.0	11.0	1.9	0.0	4.0
1158	6.0	10.0	2.28	1.0	4.0	11.0	1.9	0.0	4.0	11.0	1.9	0.0	4.0	11.0	1.9	0.0	4.0	11.0	1.9	0.0	4.0	11.0	1.9	0.0	4.0	11.0	1.9	0.0	4.0	11.0	1.9	0.0	4.0	11.0	1.9	0.0	6.0	10.0	2.28	1.0	4.0	11.0	1.9	0.0	4.0	11.0	1.9	0.0	6.0
1159	4.0	11.0	1.9	0.0	6.0	10.0	2.28	1.0	4.0	11.0	1.9	0.0	6.0	10.0	2.28	1.0	4.0	11.0	1.9	0.0	4.0	11.0	1.9	0.0	4.0	11.0	1.9	0.0	4.0	11.0	1.9	0.0	4.0	11.0	1.9	0.0	4.0	11.0	1.9	0.0	4.0	11.0	1.9	0.0	6.0	10.0	2.28	1.0	4.0
1160	4.0	11.0	1.9	0.0	4.0	11.0	1.9	0.0	4.0	11.0	1.9	0.0	4.0	11.0	1.9	0.0	4.0	11.0	1.9	0.0	4.0	11.0	1.9	0.0	4.0	11.0	1.9	0.0	6.0	10.0	2.28	1.0	4.0	11.0	1.9	0.0	6.0	10.0	2.28	1.0	4.0	11.0	1.9	0.0	4.0	11.0	1.9	0.0	4.0
1161	4.0	11.0	1.9	0.0	4.0	11.0	1.9	0.0	4.0	11.0	1.9	0.0	6.0	10.0	2.28	1.0	6.0	10.0	2.28	1.0	4.0	11.0	1.9	0.0	4.0	11.0	1.9	0.0	4.0	11.0	1.9	0.0	6.0	10.0	2.28	1.0	4.0	11.0	1.9	0.0	4.0	11.0	1.9	0.0	4.0	11.0	1.9	0.0	4.0
1162	4.0	11.0	1.9	0.0	4.0	11.0	1.9	0.0	4.0	11.0	1.9	0.0	6.0	10.0	2.28	1.0	4.0	11.0	1.9	0.0	4.0	11.0	1.9	0.0	4.0	11.0	1.9	0.0	6.0	10.0	2.28	1.0	4.0	11.0	1.9	0.0	4.0	11.0	1.9	0.0	4.0	11.0	1.9	0.0	4.0	11.0	1.9	0.0	6.0
1163	4.0	11.0	1.9	0.0	4.0	11.0	1.9	0.0	4.0	11.0	1.9	0.0	4.0	11.0	1.9	0.0	6.0	10.0	2.28	1.0	6.0	10.0	2.28	1.0	6.0	10.0	2.28	1.0	4.0	11.0	1.9	0.0	4.0	11.0	1.9	0.0	6.0	10.0	2.28	1.0	6.0	10.0	2.28	1.0	4.0	11.0	1.9	0.0	4.0
1164	4.0	11.0	1.9	0.0	4.0	11.0	1.9	0.0	4.0	11.0	1.9	0.0	6.0	10.0	2.28	1.0	4.0	11.0	1.9	0.0	6.0	10.0	2.28	1.0	4.0	11.0	1.9	0.0	6.0	10.0	2.28	1.0	4.0	11.0	1.9	0.0	6.0	10.0	2.28	1.0	4.0	11.0	1.9	0.0	4.0	11.0	1.9	0.0	4.0
1165	4.0	11.0	1.9	0.0	6.0	10.0	2.28	1.0	4.0	11.0	1.9	0.0	4.0	11.0	1.9	0.0	4.0	11.0	1.9	0.0	6.0	10.0	2.28	1.0	4.0	11.0	1.9	0.0	4.0	11.0	1.9	0.0	4.0	11.0	1.9	0.0	4.0	11.0	1.9	0.0	6.0	10.0	2.28	1.0	4.0	11.0	1.9	0.0	6.0
1166	6.0	10.0	2.28	1.0	4.0	11.0	1.9	0.0	4.0	11.0	1.9	0.0	4.0	11.0	1.9	0.0	4.0	11.0	1.9	0.0	4.0	11.0	1.9	0.0	6.0	10.0	2.28	1.0	4.0	11.0	1.9	0.0	4.0	11.0	1.9	0.0	4.0	11.0	1.9	0.0	4.0	11.0	1.9	0.0	6.0	10.0	2.28	1.0	4.0
1167	6.0	10.0	2.28	1.0	4.0	11.0	1.9	0.0	4.0	11.0	1.9	0.0	6.0	10.0	2.28	1.0	4.0	11.0	1.9	0.0	4.0	11.0	1.9	0.0	4.0	11.0	1.9	0.0	4.0	11.0	1.9	0.0	6.0	10.0	2.28	1.0	4.0	11.0	1.9	0.0	4.0	11.0	1.9	0.0	4.0	11.0	1.9	0.0	4.0
1168	4.0	11.0	1.9	0.0	4.0	11.0	1.9	0.0	4.0	11.0	1.9	0.0	4.0	11.0	1.9	0.0	4.0	11.0	1.9	0.0	6.0	10.0	2.28	1.0	4.0	11.0	1.9	0.0	6.0	10.0	2.28	1.0	4.0	11.0	1.9	0.0	4.0	11.0	1.9	0.0	4.0	11.0	1.9	0.0	4.0	11.0	1.9	0.0	4.0
1169	6.0	10.0	2.28	1.0	4.0	11.0	1.9	0.0	4.0	11.0	1.9	0.0	4.0	11.0	1.9	0.0	4.0	11.0	1.9	0.0	4.0	11.0	1.9	0.0	4.0	11.0	1.9	0.0	4.0	11.0	1.9	0.0	4.0	11.0	1.9	0.0	4.0	11.0	1.9	0.0	4.0	11.0	1.9	0.0	6.0	10.0	2.28	1.0	4.0
1170	4.0	11.0	1.9	0.0	4.0	11.0	1.9	0.0	4.0	11.0	1.9	0.0	4.0	11.0	1.9	0.0	6.0	10.0	2.28	1.0	4.0	11.0	1.9	0.0	4.0	11.0	1.9	0.0	4.0	11.0	1.9	0.0	4.0	11.0	1.9	0.0	6.0	10.0	2.28	1.0	4.0	11.0	1.9	0.0	4.0	11.0	1.9	0.0	4.0
1171	4.0	11.0	1.9	0.0	6.0	10.0	2.28	1.0	6.0	10.0	2.28	1.0	4.0	11.0	1.9	0.0	4.0	11.0	1.9	0.0	4.0	11.0	1.9	0.0	6.0	10.0	2.28	1.0	4.0	11.0	1.9	0.0	4.0	11.0	1.9	0.0	6.0	10.0	2.28	1.0	4.0	11.0	1.9	0.0	4.0	11.0	1.9	0.0	4.0
1172	4.0	11.0	1.9	0.0	4.0	11.0	1.9	0.0	4.0	11.0	1.9	0.0	4.0	11.0	1.9	0.0	6.0	10.0	2.28	1.0	4.0	11.0	1.9	0.0	6.0	10.0	2.28	1.0	6.0	10.0	2.28	1.0	4.0	11.0	1.9	0.0	6.0	10.0	2.28	1.0	4.0	11.0	1.9	0.0	4.0	11.0	1.9	0.0	4.0
1173	4.0	11.0	1.9	0.0	4.0	11.0	1.9	0.0	4.0	11.0	1.9	0.0	4.0	11.0	1.9	0.0	4.0	11.0	1.9	0.0	4.0	11.0	1.9	0.0	4.0	11.0	1.9	0.0	6.0	10.0	2.28	1.0	4.0	11.0	1.9	0.0	6.0	10.0	2.28	1.0	4.0	11.0	1.9	0.0	4.0	11.0	1.9	0.0	6.0
1174	4.0	11.0	1.9	0.0	4.0	11.0	1.9	0.0	6.0	10.0	2.28	1.0	4.0	11.0	1.9	0.0	4.0	11.0	1.9	0.0	6.0	10.0	2.28	1.0	4.0	11.0	1.9	0.0	4.0	11.0	1.9	0.0	4.0	11.0	1.9	0.0	4.0	11.0	1.9	0.0	4.0	11.0	1.9	0.0	4.0	11.0	1.9	0.0	4.0
1175	4.0	11.0	1.9	0.0	4.0	11.0	1.9	0.0	4.0	11.0	1.9	0.0	4.0	11.0	1.9	0.0	4.0	11.0	1.9	0.0	6.0	10.0	2.28	1.0	4.0	11.0	1.9	0.0	4.0	11.0	1.9	0.0	4.0	11.0	1.9	0.0	4.0	11.0	1.9	0.0	4.0	11.0	1.9	0.0	6.0	10.0	2.28	1.0	4.0
1176	6.0	10.0	2.28	1.0	4.0	11.0	1.9	0.0	4.0	11.0	1.9	0.0	6.0	10.0	2.28	1.0	4.0	11.0	1.9	0.0	4.0	11.0	1.9	0.0	4.0	11.0	1.9	0.0	4.0	11.0	1.9	0.0	4.0	11.0	1.9	0.0	4.0	11.0	1.9	0.0	4.0	11.0	1.9	0.0	6.0	10.0	2.28	1.0	4.0
1177	6.0	10.0	2.28	1.0	6.0	10.0	2.28	1.0	6.0	10.0	2.28	1.0	6.0	10.0	2.28	1.0	4.0	11.0	1.9	0.0	6.0	10.0	2.28	1.0	4.0	11.0	1.9	0.0	4.0	11.0	1.9	0.0	4.0	11.0	1.9	0.0	4.0	11.0	1.9	0.0	6.0	10.0	2.28	1.0	4.0	11.0	1.9	0.0	4.0
1178	4.0	11.0	1.9	0.0	4.0	11.0	1.9	0.0	4.0	11.0	1.9	0.0	6.0	10.0	2.28	1.0	6.0	10.0	2.28	1.0	4.0	11.0	1.9	0.0	4.0	11.0	1.9	0.0	6.0	10.0	2.28	1.0	4.0	11.0	1.9	0.0	4.0	11.0	1.9	0.0	4.0	11.0	1.9	0.0	4.0	11.0	1.9	0.0	4.0
1179	4.0	11.0	1.9	0.0	4.0	11.0	1.9	0.0	6.0	10.0	2.28	1.0	4.0	11.0	1.9	0.0	4.0	11.0	1.9	0.0	6.0	10.0	2.28	1.0	4.0	11.0	1.9	0.0	4.0	11.0	1.9	0.0	6.0	10.0	2.28	1.0	4.0	11.0	1.9	0.0	4.0	11.0	1.9	0.0	4.0	11.0	1.9	0.0	4.0
1180	4.0	11.0	1.9	0.0	4.0	11.0	1.9	0.0	4.0	11.0	1.9	0.0	4.0	11.0	1.9	0.0	4.0	11.0	1.9	0.0	6.0	10.0	2.28	1.0	6.0	10.0	2.28	1.0	4.0	11.0	1.9	0.0	4.0	11.0	1.9	0.0	4.0	11.0	1.9	0.0	4.0	11.0	1.9	0.0	4.0	11.0	1.9	0.0	4.0
1181	4.0	11.0	1.9	0.0	4.0	11.0	1.9	0.0	6.0	10.0	2.28	1.0	4.0	11.0	1.9	0.0	4.0	11.0	1.9	0.0	4.0	11.0	1.9	0.0	6.0	10.0	2.28	1.0	4.0	11.0	1.9	0.0	6.0	10.0	2.28	1.0	6.0	10.0	2.28	1.0	6.0	10.0	2.28	1.0	4.0	11.0	1.9	0.0	4.0
1182	4.0	11.0	1.9	0.0	6.0	10.0	2.28	1.0	6.0	10.0	2.28	1.0	6.0	10.0	2.28	1.0	6.0	10.0	2.28	1.0	4.0	11.0	1.9	0.0	4.0	11.0	1.9	0.0	4.0	11.0	1.9	0.0	4.0	11.0	1.9	0.0	6.0	10.0	2.28	1.0	4.0	11.0	1.9	0.0	4.0	11.0	1.9	0.0	4.0
1183	4.0	11.0	1.9	0.0	4.0	11.0	1.9	0.0	4.0	11.0	1.9	0.0	6.0	10.0	2.28	1.0	4.0	11.0	1.9	0.0	6.0	10.0	2.28	1.0	6.0	10.0	2.28	1.0	6.0	10.0	2.28	1.0	4.0	11.0	1.9	0.0	6.0	10.0	2.28	1.0	4.0	11.0	1.9	0.0	6.0	10.0	2.28	1.0	4.0
1184	4.0	11.0	1.9	0.0	4.0	11.0	1.9	0.0	4.0	11.0	1.9	0.0	4.0	11.0	1.9	0.0	4.0	11.0	1.9	0.0	4.0	11.0	1.9	0.0	4.0	11.0	1.9	0.0	4.0	11.0	1.9	0.0	4.0	11.0	1.9	0.0	4.0	11.0	1.9	0.0	6.0	10.0	2.28	1.0	6.0	10.0	2.28	1.0	4.0
1185	4.0	11.0	1.9	0.0	6.0	10.0	2.28	1.0	4.0	11.0	1.9	0.0	4.0	11.0	1.9	0.0	6.0	10.0	2.28	1.0	4.0	11.0	1.9	0.0	4.0	11.0	1.9	0.0	4.0	11.0	1.9	0.0	4.0	11.0	1.9	0.0	4.0	11.0	1.9	0.0	4.0	11.0	1.9	0.0	6.0	10.0	2.28	1.0	6.0
1186	4.0	11.0	1.9	0.0	4.0	11.0	1.9	0.0	4.0	11.0	1.9	0.0	4.0	11.0	1.9	0.0	6.0	10.0	2.28	1.0	4.0	11.0	1.9	0.0	4.0	11.0	1.9	0.0	4.0	11.0	1.9	0.0	4.0	11.0	1.9	0.0	6.0	10.0	2.28	1.0	6.0	10.0	2.28	1.0	4.0	11.0	1.9	0.0	4.0
1187	4.0	11.0	1.9	0.0	6.0	10.0	2.28	1.0	4.0	11.0	1.9	0.0	6.0	10.0	2.28	1.0	4.0	11.0	1.9	0.0	4.0	11.0	1.9	0.0	4.0	11.0	1.9	0.0	4.0	11.0	1.9	0.0	4.0	11.0	1.9	0.0	4.0	11.0	1.9	0.0	4.0	11.0	1.9	0.0	4.0	11.0	1.9	0.0	4.0
1188	4.0	11.0	1.9	0.0	4.0	11.0	1.9	0.0	6.0	10.0	2.28	1.0	4.0	11.0	1.9	0.0	6.0	10.0	2.28	1.0	4.0	11.0	1.9	0.0	6.0	10.0	2.28	1.0	4.0	11.0	1.9	0.0	4.0	11.0	1.9	0.0	6.0	10.0	2.28	1.0	4.0	11.0	1.9	0.0	4.0	11.0	1.9	0.0	4.0
1189	4.0	11.0	1.9	0.0	6.0	10.0	2.28	1.0	4.0	11.0	1.9	0.0	4.0	11.0	1.9	0.0	4.0	11.0	1.9	0.0	4.0	11.0	1.9	0.0	4.0	11.0	1.9	0.0	4.0	11.0	1.9	0.0	4.0	11.0	1.9	0.0	4.0	11.0	1.9	0.0	6.0	10.0	2.28	1.0	4.0	11.0	1.9	0.0	4.0
1190	4.0	11.0	1.9	0.0	6.0	10.0	2.28	1.0	4.0	11.0	1.9	0.0	4.0	11.0	1.9	0.0	4.0	11.0	1.9	0.0	4.0	11.0	1.9	0.0	4.0	11.0	1.9	0.0	4.0	11.0	1.9	0.0	6.0	10.0	2.28	1.0	4.0	11.0	1.9	0.0	4.0	11.0	1.9	0.0	6.0	10.0	2.28	1.0	4.0
1191	4.0	11.0	1.9	0.0	4.0	11.0	1.9	0.0	4.0	11.0	1.9	0.0	4.0	11.0	1.9	0.0	4.0	11.0	1.9	0.0	6.0	10.0	2.28	1.0	6.0	10.0	2.28	1.0	4.0	11.0	1.9	0.0	4.0	11.0	1.9	0.0	6.0	10.0	2.28	1.0	4.0	11.0	1.9	0.0	4.0	11.0	1.9	0.0	6.0
1192	4.0	11.0	1.9	0.0	4.0	11.0	1.9	0.0	4.0	11.0	1.9	0.0	4.0	11.0	1.9	0.0	6.0	10.0	2.28	1.0	4.0	11.0	1.9	0.0	4.0	11.0	1.9	0.0	4.0	11.0	1.9	0.0	4.0	11.0	1.9	0.0	4.0	11.0	1.9	0.0	6.0	10.0	2.28	1.0	4.0	11.0	1.9	0.0	6.0
1193	4.0	11.0	1.9	0.0	4.0	11.0	1.9	0.0	6.0	10.0	2.28	1.0	4.0	11.0	1.9	0.0	4.0	11.0	1.9	0.0	4.0	11.0	1.9	0.0	4.0	11.0	1.9	0.0	6.0	10.0	2.28	1.0	6.0	10.0	2.28	1.0	6.0	10.0	2.28	1.0	4.0	11.0	1.9	0.0	4.0	11.0	1.9	0.0	4.0
1194	4.0	11.0	1.9	0.0	4.0	11.0	1.9	0.0	6.0	10.0	2.28	1.0	4.0	11.0	1.9	0.0	4.0	11.0	1.9	0.0	4.0	11.0	1.9	0.0	4.0	11.0	1.9	0.0	6.0	10.0	2.28	1.0	4.0	11.0	1.9	0.0	4.0	11.0	1.9	0.0	6.0	10.0	2.28	1.0	4.0	11.0	1.9	0.0	6.0
1195	4.0	11.0	1.9	0.0	6.0	10.0	2.28	1.0	6.0	10.0	2.28	1.0	4.0	11.0	1.9	0.0	4.0	11.0	1.9	0.0	4.0	11.0	1.9	0.0	6.0	10.0	2.28	1.0	4.0	11.0	1.9	0.0	4.0	11.0	1.9	0.0	4.0	11.0	1.9	0.0	4.0	11.0	1.9	0.0	4.0	11.0	1.9	0.0	6.0
1196	4.0	11.0	1.9	0.0	4.0	11.0	1.9	0.0	6.0	11.0	2.54	0.0	4.0	11.0	1.9	0.0	4.0	11.0	1.9	0.0	4.0	11.0	1.9	0.0	4.0	11.0	1.9	0.0	4.0	11.0	1.9	0.0	4.0	11.0	1.9	0.0	4.0	11.0	1.9	0.0	4.0	11.0	1.9	0.0	4.0	11.0	1.9	0.0	4.0
1197	4.0	11.0	1.9	0.0	6.0	11.0	2.54	0.0	4.0	11.0	1.9	0.0	4.0	11.0	1.9	0.0	6.0	11.0	2.54	0.0	4.0	11.0	1.9	0.0	4.0	11.0	1.9	0.0	4.0	11.0	1.9	0.0	4.0	11.0	1.9	0.0	6.0	11.0	2.54	0.0	4.0	11.0	1.9	0.0	4.0	11.0	1.9	0.0	4.0
1198	6.0	11.0	2.54	0.0	4.0	11.0	1.9	0.0	4.0	11.0	1.9	0.0	4.0	11.0	1.9	0.0	4.0	11.0	1.9	0.0	4.0	11.0	1.9	0.0	4.0	11.0	1.9	0.0	4.0	11.0	1.9	0.0	4.0	11.0	1.9	0.0	4.0	11.0	1.9	0.0	4.0	11.0	1.9	0.0	4.0	11.0	1.9	0.0	6.0
1199	6.0	11.0	2.54	0.0	4.0	11.0	1.9	0.0	4.0	11.0	1.9	0.0	4.0	11.0	1.9	0.0	6.0	11.0	2.54	0.0	4.0	11.0	1.9	0.0	4.0	11.0	1.9	0.0	6.0	11.0	2.54	0.0	4.0	11.0	1.9	0.0	6.0	11.0	2.54	0.0	6.0	11.0	2.54	0.0	4.0	11.0	1.9	0.0	4.0
1200	4.0	11.0	1.9	0.0	6.0	11.0	2.54	0.0	6.0	11.0	2.54	0.0	4.0	11.0	1.9	0.0	4.0	11.0	1.9	0.0	6.0	11.0	2.54	0.0	4.0	11.0	1.9	0.0	4.0	11.0	1.9	0.0	4.0	11.0	1.9	0.0	4.0	11.0	1.9	0.0	4.0	11.0	1.9	0.0	4.0	11.0	1.9	0.0	6.0
1201	4.0	11.0	1.9	0.0	4.0	11.0	1.9	0.0	4.0	11.0	1.9	0.0	4.0	11.0	1.9	0.0	4.0	11.0	1.9	0.0	4.0	11.0	1.9	0.0	4.0	11.0	1.9	0.0	4.0	11.0	1.9	0.0	4.0	11.0	1.9	0.0	6.0	11.0	2.54	0.0	4.0	11.0	1.9	0.0	4.0	11.0	1.9	0.0	4.0
1202	6.0	11.0	2.54	0.0	4.0	11.0	1.9	0.0	4.0	11.0	1.9	0.0	4.0	11.0	1.9	0.0	6.0	11.0	2.54	0.0	4.0	11.0	1.9	0.0	4.0	11.0	1.9	0.0	6.0	11.0	2.54	0.0	4.0	11.0	1.9	0.0	6.0	11.0	2.54	0.0	4.0	11.0	1.9	0.0	4.0	11.0	1.9	0.0	4.0
1203	4.0	11.0	1.9	0.0	6.0	11.0	2.54	0.0	4.0	11.0	1.9	0.0	4.0	11.0	1.9	0.0	4.0	11.0	1.9	0.0	6.0	11.0	2.54	0.0	4.0	11.0	1.9	0.0	4.0	11.0	1.9	0.0	4.0	11.0	1.9	0.0	4.0	11.0	1.9	0.0	6.0	11.0	2.54	0.0	6.0	11.0	2.54	0.0	4.0
1204	4.0	11.0	1.9	0.0	4.0	11.0	1.9	0.0	4.0	11.0	1.9	0.0	6.0	11.0	2.54	0.0	4.0	11.0	1.9	0.0	4.0	11.0	1.9	0.0	4.0	11.0	1.9	0.0	4.0	11.0	1.9	0.0	4.0	11.0	1.9	0.0	4.0	11.0	1.9	0.0	4.0	11.0	1.9	0.0	4.0	11.0	1.9	0.0	4.0
1205	4.0	11.0	1.9	0.0	6.0	11.0	2.54	0.0	4.0	11.0	1.9	0.0	4.0	11.0	1.9	0.0	4.0	11.0	1.9	0.0	4.0	11.0	1.9	0.0	4.0	11.0	1.9	0.0	4.0	11.0	1.9	0.0	4.0	11.0	1.9	0.0	4.0	11.0	1.9	0.0	4.0	11.0	1.9	0.0	4.0	11.0	1.9	0.0	4.0
1206	4.0	11.0	1.9	0.0	6.0	11.0	2.54	0.0	4.0	11.0	1.9	0.0	4.0	11.0	1.9	0.0	4.0	11.0	1.9	0.0	6.0	11.0	2.54	0.0	4.0	11.0	1.9	0.0	4.0	11.0	1.9	0.0	4.0	11.0	1.9	0.0	4.0	11.0	1.9	0.0	4.0	11.0	1.9	0.0	4.0	11.0	1.9	0.0	4.0
1207	4.0	11.0	1.9	0.0	4.0	11.0	1.9	0.0	4.0	11.0	1.9	0.0	4.0	11.0	1.9	0.0	6.0	11.0	2.54	0.0	4.0	11.0	1.9	0.0	6.0	11.0	2.54	0.0	4.0	11.0	1.9	0.0	6.0	11.0	2.54	0.0	4.0	11.0	1.9	0.0	6.0	11.0	2.54	0.0	4.0	11.0	1.9	0.0	4.0
1208	4.0	11.0	1.9	0.0	4.0	11.0	1.9	0.0	4.0	11.0	1.9	0.0	4.0	11.0	1.9	0.0	4.0	11.0	1.9	0.0	4.0	11.0	1.9	0.0	6.0	11.0	2.54	0.0	4.0	11.0	1.9	0.0	4.0	11.0	1.9	0.0	4.0	11.0	1.9	0.0	4.0	11.0	1.9	0.0	6.0	11.0	2.54	0.0	4.0
1209	4.0	11.0	1.9	0.0	6.0	11.0	2.54	0.0	6.0	11.0	2.54	0.0	4.0	11.0	1.9	0.0	4.0	11.0	1.9	0.0	4.0	11.0	1.9	0.0	6.0	11.0	2.54	0.0	4.0	11.0	1.9	0.0	4.0	11.0	1.9	0.0	4.0	11.0	1.9	0.0	4.0	11.0	1.9	0.0	4.0	11.0	1.9	0.0	4.0
1210	4.0	11.0	1.9	0.0	4.0	11.0	1.9	0.0	4.0	11.0	1.9	0.0	4.0	11.0	1.9	0.0	4.0	11.0	1.9	0.0	4.0	11.0	1.9	0.0	4.0	11.0	1.9	0.0	4.0	11.0	1.9	0.0	4.0	11.0	1.9	0.0	4.0	11.0	1.9	0.0	6.0	11.0	2.54	0.0	4.0	11.0	1.9	0.0	6.0
1211	4.0	11.0	1.9	0.0	4.0	11.0	1.9	0.0	4.0	11.0	1.9	0.0	4.0	11.0	1.9	0.0	6.0	11.0	2.54	0.0	4.0	11.0	1.9	0.0	4.0	11.0	1.9	0.0	6.0	11.0	2.54	0.0	6.0	11.0	2.54	0.0	4.0	11.0	1.9	0.0	6.0	11.0	2.54	0.0	4.0	11.0	1.9	0.0	4.0
1212	4.0	11.0	1.9	0.0	4.0	11.0	1.9	0.0	6.0	11.0	2.54	0.0	4.0	11.0	1.9	0.0	6.0	11.0	2.54	0.0	6.0	11.0	2.54	0.0	4.0	11.0	1.9	0.0	6.0	11.0	2.54	0.0	6.0	11.0	2.54	0.0	4.0	11.0	1.9	0.0	6.0	11.0	2.54	0.0	6.0	11.0	2.54	0.0	4.0
1213	4.0	11.0	1.9	0.0	4.0	11.0	1.9	0.0	4.0	11.0	1.9	0.0	6.0	11.0	2.54	0.0	4.0	11.0	1.9	0.0	4.0	11.0	1.9	0.0	4.0	11.0	1.9	0.0	4.0	11.0	1.9	0.0	4.0	11.0	1.9	0.0	4.0	11.0	1.9	0.0	4.0	11.0	1.9	0.0	6.0	11.0	2.54	0.0	4.0
1214	4.0	11.0	1.9	0.0	6.0	11.0	2.54	0.0	4.0	11.0	1.9	0.0	4.0	11.0	1.9	0.0	4.0	11.0	1.9	0.0	4.0	11.0	1.9	0.0	4.0	11.0	1.9	0.0	6.0	11.0	2.54	0.0	4.0	11.0	1.9	0.0	4.0	11.0	1.9	0.0	6.0	11.0	2.54	0.0	4.0	11.0	1.9	0.0	4.0
1215	4.0	11.0	1.9	0.0	4.0	11.0	1.9	0.0	4.0	11.0	1.9	0.0	4.0	11.0	1.9	0.0	4.0	11.0	1.9	0.0	4.0	11.0	1.9	0.0	6.0	11.0	2.54	0.0	4.0	11.0	1.9	0.0	4.0	11.0	1.9	0.0	4.0	11.0	1.9	0.0	4.0	11.0	1.9	0.0	4.0	11.0	1.9	0.0	4.0
1216	4.0	11.0	1.9	0.0	4.0	11.0	1.9	0.0	4.0	11.0	1.9	0.0	4.0	11.0	1.9	0.0	4.0	11.0	1.9	0.0	4.0	11.0	1.9	0.0	4.0	11.0	1.9	0.0	4.0	11.0	1.9	0.0	4.0	11.0	1.9	0.0	6.0	11.0	2.54	0.0	4.0	11.0	1.9	0.0	4.0	11.0	1.9	0.0	6.0
1217	6.0	11.0	2.54	0.0	4.0	11.0	1.9	0.0	4.0	11.0	1.9	0.0	4.0	11.0	1.9	0.0	4.0	11.0	1.9	0.0	4.0	11.0	1.9	0.0	6.0	11.0	2.54	0.0	4.0	11.0	1.9	0.0	6.0	11.0	2.54	0.0	6.0	11.0	2.54	0.0	4.0	11.0	1.9	0.0	4.0	11.0	1.9	0.0	4.0
1218	4.0	11.0	1.9	0.0	4.0	11.0	1.9	0.0	6.0	11.0	2.54	0.0	4.0	11.0	1.9	0.0	4.0	11.0	1.9	0.0	4.0	11.0	1.9	0.0	6.0	11.0	2.54	0.0	6.0	11.0	2.54	0.0	4.0	11.0	1.9	0.0	6.0	11.0	2.54	0.0	4.0	11.0	1.9	0.0	4.0	11.0	1.9	0.0	6.0
1219	4.0	11.0	1.9	0.0	6.0	11.0	2.54	0.0	4.0	11.0	1.9	0.0	4.0	11.0	1.9	0.0	6.0	11.0	2.54	0.0	4.0	11.0	1.9	0.0	4.0	11.0	1.9	0.0	4.0	11.0	1.9	0.0	4.0	11.0	1.9	0.0	4.0	11.0	1.9	0.0	4.0	11.0	1.9	0.0	4.0	11.0	1.9	0.0	4.0
1220	4.0	11.0	1.9	0.0	4.0	11.0	1.9	0.0	4.0	11.0	1.9	0.0	6.0	11.0	2.54	0.0	4.0	11.0	1.9	0.0	4.0	11.0	1.9	0.0	4.0	11.0	1.9	0.0	4.0	11.0	1.9	0.0	6.0	11.0	2.54	0.0	6.0	11.0	2.54	0.0	4.0	11.0	1.9	0.0	4.0	11.0	1.9	0.0	4.0
1221	4.0	11.0	1.9	0.0	4.0	11.0	1.9	0.0	6.0	11.0	2.54	0.0	4.0	11.0	1.9	0.0	4.0	11.0	1.9	0.0	4.0	11.0	1.9	0.0	4.0	11.0	1.9	0.0	4.0	11.0	1.9	0.0	4.0	11.0	1.9	0.0	4.0	11.0	1.9	0.0	6.0	11.0	2.54	0.0	6.0	11.0	2.54	0.0	4.0
1222	4.0	11.0	1.9	0.0	4.0	11.0	1.9	0.0	6.0	11.0	2.54	0.0	4.0	11.0	1.9	0.0	4.0	11.0	1.9	0.0	4.0	11.0	1.9	0.0	4.0	11.0	1.9	0.0	4.0	11.0	1.9	0.0	4.0	11.0	1.9	0.0	4.0	11.0	1.9	0.0	4.0	11.0	1.9	0.0	6.0	11.0	2.54	0.0	4.0
1223	4.0	11.0	1.9	0.0	6.0	11.0	2.54	0.0	4.0	11.0	1.9	0.0	4.0	11.0	1.9	0.0	4.0	11.0	1.9	0.0	4.0	11.0	1.9	0.0	6.0	11.0	2.54	0.0	4.0	11.0	1.9	0.0	4.0	11.0	1.9	0.0	4.0	11.0	1.9	0.0	4.0	11.0	1.9	0.0	4.0	11.0	1.9	0.0	6.0
1224	4.0	11.0	1.9	0.0	4.0	11.0	1.9	0.0	4.0	11.0	1.9	0.0	4.0	11.0	1.9	0.0	4.0	11.0	1.9	0.0	4.0	11.0	1.9	0.0	4.0	11.0	1.9	0.0	4.0	11.0	1.9	0.0	4.0	11.0	1.9	0.0	4.0	11.0	1.9	0.0	6.0	11.0	2.54	0.0	4.0	11.0	1.9	0.0	4.0
1225	4.0	11.0	1.9	0.0	4.0	11.0	1.9	0.0	4.0	11.0	1.9	0.0	4.0	11.0	1.9	0.0	4.0	11.0	1.9	0.0	6.0	11.0	2.54	0.0	4.0	11.0	1.9	0.0	4.0	11.0	1.9	0.0	6.0	11.0	2.54	0.0	4.0	11.0	1.9	0.0	4.0	11.0	1.9	0.0	4.0	11.0	1.9	0.0	6.0
1226	6.0	11.0	2.54	0.0	4.0	11.0	1.9	0.0	6.0	11.0	2.54	0.0	4.0	11.0	1.9	0.0	4.0	11.0	1.9	0.0	4.0	11.0	1.9	0.0	4.0	11.0	1.9	0.0	4.0	11.0	1.9	0.0	4.0	11.0	1.9	0.0	6.0	11.0	2.54	0.0	4.0	11.0	1.9	0.0	4.0	11.0	1.9	0.0	4.0
1227	4.0	11.0	1.9	0.0	4.0	11.0	1.9	0.0	4.0	11.0	1.9	0.0	6.0	11.0	2.54	0.0	4.0	11.0	1.9	0.0	4.0	11.0	1.9	0.0	4.0	11.0	1.9	0.0	4.0	11.0	1.9	0.0	4.0	11.0	1.9	0.0	4.0	11.0	1.9	0.0	6.0	11.0	2.54	0.0	4.0	11.0	1.9	0.0	4.0
1228	4.0	11.0	1.9	0.0	4.0	11.0	1.9	0.0	4.0	11.0	1.9	0.0	4.0	11.0	1.9	0.0	4.0	11.0	1.9	0.0	4.0	11.0	1.9	0.0	4.0	11.0	1.9	0.0	4.0	11.0	1.9	0.0	6.0	11.0	2.54	0.0	4.0	11.0	1.9	0.0	4.0	11.0	1.9	0.0	4.0	11.0	1.9	0.0	4.0
1229	6.0	11.0	2.54	0.0	4.0	11.0	1.9	0.0	4.0	11.0	1.9	0.0	4.0	11.0	1.9	0.0	6.0	11.0	2.54	0.0	4.0	11.0	1.9	0.0	6.0	11.0	2.54	0.0	4.0	11.0	1.9	0.0	4.0	11.0	1.9	0.0	4.0	11.0	1.9	0.0	6.0	11.0	2.54	0.0	6.0	11.0	2.54	0.0	6.0
1230	6.0	11.0	2.54	0.0	4.0	11.0	1.9	0.0	4.0	11.0	1.9	0.0	4.0	11.0	1.9	0.0	6.0	11.0	2.54	0.0	4.0	11.0	1.9	0.0	4.0	11.0	1.9	0.0	4.0	11.0	1.9	0.0	4.0	11.0	1.9	0.0	6.0	11.0	2.54	0.0	4.0	11.0	1.9	0.0	6.0	11.0	2.54	0.0	6.0
1231	4.0	11.0	1.9	0.0	4.0	11.0	1.9	0.0	4.0	11.0	1.9	0.0	4.0	11.0	1.9	0.0	6.0	11.0	2.54	0.0	4.0	11.0	1.9	0.0	4.0	11.0	1.9	0.0	4.0	11.0	1.9	0.0	4.0	11.0	1.9	0.0	4.0	11.0	1.9	0.0	4.0	11.0	1.9	0.0	4.0	11.0	1.9	0.0	4.0
1232	4.0	11.0	1.9	0.0	4.0	11.0	1.9	0.0	4.0	11.0	1.9	0.0	4.0	11.0	1.9	0.0	4.0	11.0	1.9	0.0	4.0	11.0	1.9	0.0	4.0	11.0	1.9	0.0	4.0	11.0	1.9	0.0	4.0	11.0	1.9	0.0	6.0	11.0	2.54	0.0	4.0	11.0	1.9	0.0	6.0	11.0	2.54	0.0	4.0
1233	6.0	11.0	2.54	0.0	4.0	11.0	1.9	0.0	4.0	11.0	1.9	0.0	4.0	11.0	1.9	0.0	6.0	11.0	2.54	0.0	4.0	11.0	1.9	0.0	4.0	11.0	1.9	0.0	4.0	11.0	1.9	0.0	4.0	11.0	1.9	0.0	4.0	11.0	1.9	0.0	4.0	11.0	1.9	0.0	4.0	11.0	1.9	0.0	6.0
1234	4.0	11.0	1.9	0.0	6.0	11.0	2.54	0.0	6.0	11.0	2.54	0.0	6.0	11.0	2.54	0.0	6.0	11.0	2.54	0.0	4.0	11.0	1.9	0.0	4.0	11.0	1.9	0.0	4.0	11.0	1.9	0.0	4.0	11.0	1.9	0.0	4.0	11.0	1.9	0.0	4.0	11.0	1.9	0.0	6.0	11.0	2.54	0.0	4.0
1235	4.0	11.0	1.9	0.0	4.0	11.0	1.9	0.0	4.0	11.0	1.9	0.0	4.0	11.0	1.9	0.0	4.0	11.0	1.9	0.0	4.0	11.0	1.9	0.0	4.0	11.0	1.9	0.0	6.0	11.0	2.54	0.0	4.0	11.0	1.9	0.0	4.0	11.0	1.9	0.0	4.0	11.0	1.9	0.0	4.0	11.0	1.9	0.0	4.0
1236	4.0	11.0	1.9	0.0	4.0	11.0	1.9	0.0	4.0	11.0	1.9	0.0	4.0	11.0	1.9	0.0	6.0	11.0	2.54	0.0	6.0	11.0	2.54	0.0	6.0	11.0	2.54	0.0	4.0	11.0	1.9	0.0	4.0	11.0	1.9	0.0	4.0	11.0	1.9	0.0	4.0	11.0	1.9	0.0	6.0	11.0	2.54	0.0	4.0
1237	4.0	11.0	1.9	0.0	4.0	11.0	1.9	0.0	4.0	11.0	1.9	0.0	4.0	11.0	1.9	0.0	6.0	11.0	2.54	0.0	4.0	11.0	1.9	0.0	6.0	11.0	2.54	0.0	4.0	11.0	1.9	0.0	4.0	11.0	1.9	0.0	4.0	11.0	1.9	0.0	4.0	11.0	1.9	0.0	4.0	11.0	1.9	0.0	4.0
1238	4.0	11.0	1.9	0.0	4.0	11.0	1.9	0.0	4.0	11.0	1.9	0.0	4.0	11.0	1.9	0.0	4.0	11.0	1.9	0.0	4.0	11.0	1.9	0.0	4.0	11.0	1.9	0.0	4.0	11.0	1.9	0.0	4.0	11.0	1.9	0.0	6.0	11.0	2.54	0.0	6.0	11.0	2.54	0.0	6.0	11.0	2.54	0.0	4.0
1239	4.0	11.0	1.9	0.0	4.0	11.0	1.9	0.0	4.0	11.0	1.9	0.0	4.0	11.0	1.9	0.0	4.0	11.0	1.9	0.0	4.0	11.0	1.9	0.0	4.0	11.0	1.9	0.0	4.0	11.0	1.9	0.0	6.0	11.0	2.54	0.0	6.0	11.0	2.54	0.0	4.0	11.0	1.9	0.0	4.0	11.0	1.9	0.0	6.0
1240	4.0	11.0	1.9	0.0	4.0	11.0	1.9	0.0	4.0	11.0	1.9	0.0	4.0	11.0	1.9	0.0	4.0	11.0	1.9	0.0	4.0	11.0	1.9	0.0	4.0	11.0	1.9	0.0	6.0	11.0	2.54	0.0	4.0	11.0	1.9	0.0	4.0	11.0	1.9	0.0	4.0	11.0	1.9	0.0	6.0	11.0	2.54	0.0	4.0
1241	4.0	11.0	1.9	0.0	4.0	11.0	1.9	0.0	4.0	11.0	1.9	0.0	6.0	11.0	2.54	0.0	4.0	11.0	1.9	0.0	6.0	11.0	2.54	0.0	4.0	11.0	1.9	0.0	4.0	11.0	1.9	0.0	4.0	11.0	1.9	0.0	6.0	11.0	2.54	0.0	4.0	11.0	1.9	0.0	4.0	11.0	1.9	0.0	4.0
1242	4.0	11.0	1.9	0.0	4.0	11.0	1.9	0.0	6.0	11.0	2.54	0.0	4.0	11.0	1.9	0.0	4.0	11.0	1.9	0.0	6.0	11.0	2.54	0.0	4.0	11.0	1.9	0.0	4.0	11.0	1.9	0.0	4.0	11.0	1.9	0.0	6.0	11.0	2.54	0.0	4.0	11.0	1.9	0.0	4.0	11.0	1.9	0.0	4.0
1243	6.0	11.0	2.54	0.0	4.0	11.0	1.9	0.0	4.0	11.0	1.9	0.0	4.0	11.0	1.9	0.0	4.0	11.0	1.9	0.0	6.0	11.0	2.54	0.0	4.0	11.0	1.9	0.0	6.0	11.0	2.54	0.0	6.0	11.0	2.54	0.0	4.0	11.0	1.9	0.0	4.0	11.0	1.9	0.0	4.0	11.0	1.9	0.0	4.0
1244	4.0	11.0	1.9	0.0	4.0	11.0	1.9	0.0	4.0	11.0	1.9	0.0	6.0	11.0	2.54	0.0	6.0	11.0	2.54	0.0	4.0	11.0	1.9	0.0	4.0	11.0	1.9	0.0	4.0	11.0	1.9	0.0	4.0	11.0	1.9	0.0	4.0	11.0	1.9	0.0	4.0	11.0	1.9	0.0	4.0	11.0	1.9	0.0	4.0
1245	4.0	11.0	1.9	0.0	4.0	11.0	1.9	0.0	4.0	11.0	1.9	0.0	4.0	11.0	1.9	0.0	4.0	11.0	1.9	0.0	4.0	11.0	1.9	0.0	6.0	11.0	2.54	0.0	4.0	11.0	1.9	0.0	4.0	11.0	1.9	0.0	4.0	11.0	1.9	0.0	6.0	11.0	2.54	0.0	4.0	11.0	1.9	0.0	6.0
1246	6.0	11.0	2.54	0.0	4.0	11.0	1.9	0.0	4.0	11.0	1.9	0.0	6.0	11.0	2.54	0.0	4.0	11.0	1.9	0.0	4.0	11.0	1.9	0.0	4.0	11.0	1.9	0.0	4.0	11.0	1.9	0.0	4.0	11.0	1.9	0.0	6.0	11.0	2.54	0.0	4.0	11.0	1.9	0.0	4.0	11.0	1.9	0.0	6.0
1247	4.0	11.0	1.9	0.0	4.0	11.0	1.9	0.0	4.0	11.0	1.9	0.0	4.0	11.0	1.9	0.0	6.0	11.0	2.54	0.0	4.0	11.0	1.9	0.0	6.0	11.0	2.54	0.0	4.0	11.0	1.9	0.0	6.0	11.0	2.54	0.0	4.0	11.0	1.9	0.0	4.0	11.0	1.9	0.0	4.0	11.0	1.9	0.0	4.0
1248	4.0	11.0	1.9	0.0	4.0	11.0	1.9	0.0	4.0	11.0	1.9	0.0	4.0	11.0	1.9	0.0	6.0	11.0	2.54	0.0	6.0	11.0	2.54	0.0	4.0	11.0	1.9	0.0	4.0	11.0	1.9	0.0	4.0	11.0	1.9	0.0	4.0	11.0	1.9	0.0	4.0	11.0	1.9	0.0	4.0	11.0	1.9	0.0	4.0
1249	6.0	11.0	2.54	0.0	4.0	11.0	1.9	0.0	4.0	11.0	1.9	0.0	6.0	11.0	2.54	0.0	4.0	11.0	1.9	0.0	4.0	11.0	1.9	0.0	6.0	11.0	2.54	0.0	4.0	11.0	1.9	0.0	4.0	11.0	1.9	0.0	4.0	11.0	1.9	0.0	4.0	11.0	1.9	0.0	6.0	11.0	2.54	0.0	4.0
1250	6.0	11.0	2.54	0.0	6.0	11.0	2.54	0.0	4.0	11.0	1.9	0.0	4.0	11.0	1.9	0.0	4.0	11.0	1.9	0.0	4.0	11.0	1.9	0.0	4.0	11.0	1.9	0.0	6.0	11.0	2.54	0.0	4.0	11.0	1.9	0.0	4.0	11.0	1.9	0.0	4.0	11.0	1.9	0.0	4.0	11.0	1.9	0.0	4.0
1251	4.0	11.0	1.9	0.0	6.0	11.0	2.54	0.0	4.0	11.0	1.9	0.0	4.0	11.0	1.9	0.0	4.0	11.0	1.9	0.0	4.0	11.0	1.9	0.0	4.0	11.0	1.9	0.0	4.0	11.0	1.9	0.0	4.0	11.0	1.9	0.0	4.0	11.0	1.9	0.0	4.0	11.0	1.9	0.0	6.0	11.0	2.54	0.0	4.0
1252	4.0	11.0	1.9	0.0	6.0	11.0	2.54	0.0	4.0	11.0	1.9	0.0	4.0	11.0	1.9	0.0	6.0	11.0	2.54	0.0	4.0	11.0	1.9	0.0	4.0	11.0	1.9	0.0	4.0	11.0	1.9	0.0	4.0	11.0	1.9	0.0	4.0	11.0	1.9	0.0	6.0	11.0	2.54	0.0	4.0	11.0	1.9	0.0	4.0
1253	6.0	11.0	2.54	0.0	6.0	11.0	2.54	0.0	4.0	11.0	1.9	0.0	4.0	11.0	1.9	0.0	4.0	11.0	1.9	0.0	4.0	11.0	1.9	0.0	4.0	11.0	1.9	0.0	4.0	11.0	1.9	0.0	4.0	11.0	1.9	0.0	4.0	11.0	1.9	0.0	4.0	11.0	1.9	0.0	6.0	11.0	2.54	0.0	6.0
1254	4.0	11.0	1.9	0.0	4.0	11.0	1.9	0.0	4.0	11.0	1.9	0.0	4.0	11.0	1.9	0.0	4.0	11.0	1.9	0.0	4.0	11.0	1.9	0.0	6.0	11.0	2.54	0.0	4.0	11.0	1.9	0.0	4.0	11.0	1.9	0.0	4.0	11.0	1.9	0.0	4.0	11.0	1.9	0.0	6.0	11.0	2.54	0.0	6.0
1255	6.0	11.0	2.54	0.0	4.0	11.0	1.9	0.0	4.0	11.0	1.9	0.0	6.0	11.0	2.54	0.0	4.0	11.0	1.9	0.0	4.0	11.0	1.9	0.0	4.0	11.0	1.9	0.0	4.0	11.0	1.9	0.0	4.0	11.0	1.9	0.0	6.0	11.0	2.54	0.0	4.0	11.0	1.9	0.0	4.0	11.0	1.9	0.0	4.0
1256	4.0	11.0	1.9	0.0	4.0	11.0	1.9	0.0	6.0	11.0	2.54	0.0	4.0	11.0	1.9	0.0	4.0	11.0	1.9	0.0	4.0	11.0	1.9	0.0	6.0	11.0	2.54	0.0	4.0	11.0	1.9	0.0	4.0	11.0	1.9	0.0	4.0	11.0	1.9	0.0	4.0	11.0	1.9	0.0	4.0	11.0	1.9	0.0	4.0
1257	4.0	11.0	1.9	0.0	6.0	11.0	2.54	0.0	4.0	11.0	1.9	0.0	4.0	11.0	1.9	0.0	6.0	11.0	2.54	0.0	6.0	11.0	2.54	0.0	4.0	11.0	1.9	0.0	4.0	11.0	1.9	0.0	4.0	11.0	1.9	0.0	4.0	11.0	1.9	0.0	6.0	11.0	2.54	0.0	4.0	11.0	1.9	0.0	6.0
1258	4.0	11.0	1.9	0.0	4.0	11.0	1.9	0.0	6.0	11.0	2.54	0.0	6.0	11.0	2.54	0.0	4.0	11.0	1.9	0.0	6.0	11.0	2.54	0.0	4.0	11.0	1.9	0.0	4.0	11.0	1.9	0.0	4.0	11.0	1.9	0.0	4.0	11.0	1.9	0.0	4.0	11.0	1.9	0.0	4.0	11.0	1.9	0.0	4.0
1259	4.0	11.0	1.9	0.0	6.0	11.0	2.54	0.0	6.0	11.0	2.54	0.0	6.0	11.0	2.54	0.0	6.0	11.0	2.54	0.0	4.0	11.0	1.9	0.0	4.0	11.0	1.9	0.0	6.0	11.0	2.54	0.0	4.0	11.0	1.9	0.0	4.0	11.0	1.9	0.0	4.0	11.0	1.9	0.0	4.0	11.0	1.9	0.0	4.0
1260	4.0	11.0	1.9	0.0	4.0	11.0	1.9	0.0	4.0	11.0	1.9	0.0	6.0	11.0	2.54	0.0	4.0	11.0	1.9	0.0	4.0	11.0	1.9	0.0	6.0	11.0	2.54	0.0	4.0	11.0	1.9	0.0	6.0	11.0	2.54	0.0	4.0	11.0	1.9	0.0	4.0	11.0	1.9	0.0	4.0	11.0	1.9	0.0	4.0
1261	4.0	11.0	1.9	0.0	4.0	11.0	1.9	0.0	4.0	11.0	1.9	0.0	4.0	11.0	1.9	0.0	4.0	11.0	1.9	0.0	4.0	11.0	1.9	0.0	6.0	11.0	2.54	0.0	6.0	11.0	2.54	0.0	4.0	11.0	1.9	0.0	6.0	11.0	2.54	0.0	4.0	11.0	1.9	0.0	4.0	11.0	1.9	0.0	4.0
1262	6.0	11.0	2.54	0.0	4.0	11.0	1.9	0.0	4.0	11.0	1.9	0.0	4.0	11.0	1.9	0.0	4.0	11.0	1.9	0.0	4.0	11.0	1.9	0.0	4.0	11.0	1.9	0.0	4.0	11.0	1.9	0.0	6.0	11.0	2.54	0.0	4.0	11.0	1.9	0.0	4.0	11.0	1.9	0.0	6.0	11.0	2.54	0.0	4.0
1263	4.0	11.0	1.9	0.0	4.0	11.0	1.9	0.0	4.0	11.0	1.9	0.0	4.0	11.0	1.9	0.0	4.0	11.0	1.9	0.0	4.0	11.0	1.9	0.0	4.0	11.0	1.9	0.0	4.0	11.0	1.9	0.0	4.0	11.0	1.9	0.0	4.0	11.0	1.9	0.0	4.0	11.0	1.9	0.0	6.0	11.0	2.54	0.0	4.0
1264	6.0	11.0	2.54	0.0	4.0	11.0	1.9	0.0	4.0	11.0	1.9	0.0	4.0	11.0	1.9	0.0	6.0	11.0	2.54	0.0	4.0	11.0	1.9	0.0	4.0	11.0	1.9	0.0	4.0	11.0	1.9	0.0	6.0	11.0	2.54	0.0	4.0	11.0	1.9	0.0	4.0	11.0	1.9	0.0	4.0	11.0	1.9	0.0	4.0
1265	4.0	11.0	1.9	0.0	6.0	11.0	2.54	0.0	4.0	11.0	1.9	0.0	4.0	11.0	1.9	0.0	4.0	11.0	1.9	0.0	4.0	11.0	1.9	0.0	6.0	11.0	2.54	0.0	4.0	11.0	1.9	0.0	4.0	11.0	1.9	0.0	4.0	11.0	1.9	0.0	6.0	11.0	2.54	0.0	4.0	11.0	1.9	0.0	4.0
1266	4.0	11.0	1.9	0.0	4.0	11.0	1.9	0.0	4.0	11.0	1.9	0.0	6.0	11.0	2.54	0.0	4.0	11.0	1.9	0.0	6.0	11.0	2.54	0.0	4.0	11.0	1.9	0.0	4.0	11.0	1.9	0.0	4.0	11.0	1.9	0.0	6.0	11.0	2.54	0.0	4.0	11.0	1.9	0.0	6.0	11.0	2.54	0.0	4.0
1267	6.0	11.0	2.54	0.0	4.0	11.0	1.9	0.0	6.0	11.0	2.54	0.0	6.0	11.0	2.54	0.0	4.0	11.0	1.9	0.0	6.0	11.0	2.54	0.0	4.0	11.0	1.9	0.0	4.0	11.0	1.9	0.0	4.0	11.0	1.9	0.0	4.0	11.0	1.9	0.0	6.0	11.0	2.54	0.0	4.0	11.0	1.9	0.0	4.0
1268	4.0	11.0	1.9	0.0	6.0	11.0	2.54	0.0	4.0	11.0	1.9	0.0	4.0	11.0	1.9	0.0	4.0	11.0	1.9	0.0	6.0	11.0	2.54	0.0	6.0	11.0	2.54	0.0	4.0	11.0	1.9	0.0	4.0	11.0	1.9	0.0	4.0	11.0	1.9	0.0	4.0	11.0	1.9	0.0	4.0	11.0	1.9	0.0	4.0
1269	4.0	11.0	1.9	0.0	4.0	11.0	1.9	0.0	4.0	11.0	1.9	0.0	4.0	11.0	1.9	0.0	6.0	11.0	2.54	0.0	4.0	11.0	1.9	0.0	4.0	11.0	1.9	0.0	6.0	11.0	2.54	0.0	4.0	11.0	1.9	0.0	4.0	11.0	1.9	0.0	4.0	11.0	1.9	0.0	4.0	11.0	1.9	0.0	4.0
1270	6.0	11.0	2.54	0.0	4.0	11.0	1.9	0.0	4.0	11.0	1.9	0.0	4.0	11.0	1.9	0.0	4.0	11.0	1.9	0.0	6.0	11.0	2.54	0.0	4.0	11.0	1.9	0.0	4.0	11.0	1.9	0.0	4.0	11.0	1.9	0.0	6.0	11.0	2.54	0.0	4.0	11.0	1.9	0.0	4.0	11.0	1.9	0.0	4.0
1271	4.0	11.0	1.9	0.0	4.0	11.0	1.9	0.0	4.0	11.0	1.9	0.0	4.0	11.0	1.9	0.0	4.0	11.0	1.9	0.0	6.0	11.0	2.54	0.0	4.0	11.0	1.9	0.0	4.0	11.0	1.9	0.0	4.0	11.0	1.9	0.0	4.0	11.0	1.9	0.0	4.0	11.0	1.9	0.0	4.0	11.0	1.9	0.0	4.0
1272	4.0	11.0	1.9	0.0	4.0	11.0	1.9	0.0	6.0	11.0	2.54	0.0	6.0	11.0	2.54	0.0	4.0	11.0	1.9	0.0	4.0	11.0	1.9	0.0	4.0	11.0	1.9	0.0	4.0	11.0	1.9	0.0	4.0	11.0	1.9	0.0	4.0	11.0	1.9	0.0	4.0	11.0	1.9	0.0	4.0	11.0	1.9	0.0	4.0
1273	4.0	11.0	1.9	0.0	4.0	11.0	1.9	0.0	6.0	11.0	2.54	0.0	6.0	11.0	2.54	0.0	4.0	11.0	1.9	0.0	4.0	11.0	1.9	0.0	4.0	11.0	1.9	0.0	4.0	11.0	1.9	0.0	4.0	11.0	1.9	0.0	6.0	11.0	2.54	0.0	4.0	11.0	1.9	0.0	4.0	11.0	1.9	0.0	4.0
1274	4.0	11.0	1.9	0.0	6.0	11.0	2.54	0.0	4.0	11.0	1.9	0.0	6.0	11.0	2.54	0.0	4.0	11.0	1.9	0.0	4.0	11.0	1.9	0.0	6.0	11.0	2.54	0.0	6.0	11.0	2.54	0.0	4.0	11.0	1.9	0.0	4.0	11.0	1.9	0.0	4.0	11.0	1.9	0.0	6.0	11.0	2.54	0.0	4.0
1275	4.0	11.0	1.9	0.0	4.0	11.0	1.9	0.0	6.0	11.0	2.54	0.0	4.0	11.0	1.9	0.0	4.0	11.0	1.9	0.0	4.0	11.0	1.9	0.0	6.0	11.0	2.54	0.0	4.0	11.0	1.9	0.0	4.0	11.0	1.9	0.0	4.0	11.0	1.9	0.0	4.0	11.0	1.9	0.0	4.0	11.0	1.9	0.0	6.0
1276	4.0	11.0	1.9	0.0	4.0	11.0	1.9	0.0	4.0	11.0	1.9	0.0	4.0	11.0	1.9	0.0	6.0	11.0	2.54	0.0	4.0	11.0	1.9	0.0	6.0	11.0	2.54	0.0	4.0	11.0	1.9	0.0	4.0	11.0	1.9	0.0	4.0	11.0	1.9	0.0	4.0	11.0	1.9	0.0	4.0	11.0	1.9	0.0	6.0
1277	4.0	11.0	1.9	0.0	4.0	11.0	1.9	0.0	4.0	11.0	1.9	0.0	4.0	11.0	1.9	0.0	4.0	11.0	1.9	0.0	4.0	11.0	1.9	0.0	4.0	11.0	1.9	0.0	4.0	11.0	1.9	0.0	4.0	11.0	1.9	0.0	6.0	11.0	2.54	0.0	6.0	11.0	2.54	0.0	4.0	11.0	1.9	0.0	4.0
1278	6.0	11.0	2.54	0.0	4.0	11.0	1.9	0.0	4.0	11.0	1.9	0.0	4.0	11.0	1.9	0.0	4.0	11.0	1.9	0.0	6.0	11.0	2.54	0.0	4.0	11.0	1.9	0.0	6.0	11.0	2.54	0.0	4.0	11.0	1.9	0.0	6.0	11.0	2.54	0.0	6.0	11.0	2.54	0.0	6.0	11.0	2.54	0.0	4.0
1279	4.0	11.0	1.9	0.0	6.0	11.0	2.54	0.0	4.0	11.0	1.9	0.0	4.0	11.0	1.9	0.0	6.0	11.0	2.54	0.0	4.0	11.0	1.9	0.0	6.0	11.0	2.54	0.0	6.0	11.0	2.54	0.0	4.0	11.0	1.9	0.0	4.0	11.0	1.9	0.0	4.0	11.0	1.9	0.0	6.0	11.0	2.54	0.0	4.0
1280	4.0	11.0	1.9	0.0	6.0	11.0	2.54	0.0	6.0	11.0	2.54	0.0	4.0	11.0	1.9	0.0	4.0	11.0	1.9	0.0	6.0	11.0	2.54	0.0	4.0	11.0	1.9	0.0	6.0	11.0	2.54	0.0	4.0	11.0	1.9	0.0	4.0	11.0	1.9	0.0	6.0	11.0	2.54	0.0	6.0	11.0	2.54	0.0	4.0
1281	6.0	11.0	2.54	0.0	4.0	11.0	1.9	0.0	6.0	11.0	2.54	0.0	4.0	11.0	1.9	0.0	4.0	11.0	1.9	0.0	4.0	11.0	1.9	0.0	4.0	11.0	1.9	0.0	4.0	11.0	1.9	0.0	6.0	11.0	2.54	0.0	4.0	11.0	1.9	0.0	4.0	11.0	1.9	0.0	4.0	11.0	1.9	0.0	4.0
1282	4.0	11.0	1.9	0.0	4.0	11.0	1.9	0.0	4.0	11.0	1.9	0.0	4.0	11.0	1.9	0.0	4.0	11.0	1.9	0.0	4.0	11.0	1.9	0.0	6.0	11.0	2.54	0.0	4.0	11.0	1.9	0.0	6.0	11.0	2.54	0.0	4.0	11.0	1.9	0.0	4.0	11.0	1.9	0.0	4.0	11.0	1.9	0.0	4.0
1283	6.0	11.0	2.54	0.0	4.0	11.0	1.9	0.0	4.0	11.0	1.9	0.0	6.0	11.0	2.54	0.0	4.0	11.0	1.9	0.0	6.0	11.0	2.54	0.0	4.0	11.0	1.9	0.0	4.0	11.0	1.9	0.0	4.0	11.0	1.9	0.0	4.0	11.0	1.9	0.0	4.0	11.0	1.9	0.0	4.0	11.0	1.9	0.0	4.0
1284	4.0	11.0	1.9	0.0	4.0	11.0	1.9	0.0	6.0	11.0	2.54	0.0	4.0	11.0	1.9	0.0	4.0	11.0	1.9	0.0	4.0	11.0	1.9	0.0	4.0	11.0	1.9	0.0	4.0	11.0	1.9	0.0	4.0	11.0	1.9	0.0	6.0	11.0	2.54	0.0	6.0	11.0	2.54	0.0	4.0	11.0	1.9	0.0	4.0
1285	4.0	11.0	1.9	0.0	4.0	11.0	1.9	0.0	4.0	11.0	1.9	0.0	4.0	11.0	1.9	0.0	4.0	11.0	1.9	0.0	4.0	11.0	1.9	0.0	6.0	11.0	2.54	0.0	4.0	11.0	1.9	0.0	6.0	11.0	2.54	0.0	4.0	11.0	1.9	0.0	4.0	11.0	1.9	0.0	4.0	11.0	1.9	0.0	6.0
1286	4.0	11.0	1.9	0.0	4.0	11.0	1.9	0.0	4.0	11.0	1.9	0.0	4.0	11.0	1.9	0.0	6.0	11.0	2.54	0.0	4.0	11.0	1.9	0.0	4.0	11.0	1.9	0.0	4.0	11.0	1.9	0.0	4.0	11.0	1.9	0.0	4.0	11.0	1.9	0.0	4.0	11.0	1.9	0.0	6.0	11.0	2.54	0.0	4.0
1287	4.0	11.0	1.9	0.0	4.0	11.0	1.9	0.0	6.0	11.0	2.54	0.0	4.0	11.0	1.9	0.0	6.0	11.0	2.54	0.0	4.0	11.0	1.9	0.0	4.0	11.0	1.9	0.0	4.0	11.0	1.9	0.0	6.0	11.0	2.54	0.0	4.0	11.0	1.9	0.0	4.0	11.0	1.9	0.0	4.0	11.0	1.9	0.0	4.0
1288	4.0	11.0	1.9	0.0	4.0	11.0	1.9	0.0	4.0	11.0	1.9	0.0	6.0	11.0	2.54	0.0	4.0	11.0	1.9	0.0	4.0	11.0	1.9	0.0	6.0	11.0	2.54	0.0	4.0	11.0	1.9	0.0	4.0	11.0	1.9	0.0	4.0	11.0	1.9	0.0	4.0	11.0	1.9	0.0	6.0	11.0	2.54	0.0	6.0
1289	4.0	11.0	1.9	0.0	4.0	11.0	1.9	0.0	6.0	11.0	2.54	0.0	4.0	11.0	1.9	0.0	6.0	11.0	2.54	0.0	4.0	11.0	1.9	0.0	4.0	11.0	1.9	0.0	4.0	11.0	1.9	0.0	4.0	11.0	1.9	0.0	4.0	11.0	1.9	0.0	4.0	11.0	1.9	0.0	4.0	11.0	1.9	0.0	6.0
1290	4.0	11.0	1.9	0.0	4.0	11.0	1.9	0.0	4.0	11.0	1.9	0.0	6.0	11.0	2.54	0.0	6.0	11.0	2.54	0.0	4.0	11.0	1.9	0.0	4.0	11.0	1.9	0.0	4.0	11.0	1.9	0.0	4.0	11.0	1.9	0.0	4.0	11.0	1.9	0.0	6.0	11.0	2.54	0.0	4.0	11.0	1.9	0.0	4.0
1291	4.0	11.0	1.9	0.0	4.0	11.0	1.9	0.0	4.0	11.0	1.9	0.0	6.0	11.0	2.54	0.0	4.0	11.0	1.9	0.0	4.0	11.0	1.9	0.0	6.0	11.0	2.54	0.0	6.0	11.0	2.54	0.0	4.0	11.0	1.9	0.0	4.0	11.0	1.9	0.0	4.0	11.0	1.9	0.0	4.0	11.0	1.9	0.0	4.0
1292	4.0	11.0	1.9	0.0	4.0	11.0	1.9	0.0	4.0	11.0	1.9	0.0	4.0	11.0	1.9	0.0	4.0	11.0	1.9	0.0	6.0	11.0	2.54	0.0	4.0	11.0	1.9	0.0	4.0	11.0	1.9	0.0	4.0	11.0	1.9	0.0	6.0	11.0	2.54	0.0	4.0	11.0	1.9	0.0	6.0	11.0	2.54	0.0	4.0
1293	4.0	11.0	1.9	0.0	6.0	11.0	2.54	0.0	4.0	11.0	1.9	0.0	4.0	11.0	1.9	0.0	4.0	11.0	1.9	0.0	4.0	11.0	1.9	0.0	4.0	11.0	1.9	0.0	4.0	11.0	1.9	0.0	6.0	11.0	2.54	0.0	4.0	11.0	1.9	0.0	4.0	11.0	1.9	0.0	4.0	11.0	1.9	0.0	4.0
1294	4.0	11.0	1.9	0.0	4.0	11.0	1.9	0.0	4.0	11.0	1.9	0.0	4.0	11.0	1.9	0.0	4.0	11.0	1.9	0.0	4.0	11.0	1.9	0.0	4.0	11.0	1.9	0.0	6.0	11.0	2.54	0.0	6.0	11.0	2.54	0.0	4.0	11.0	1.9	0.0	4.0	11.0	1.9	0.0	4.0	11.0	1.9	0.0	6.0
1295	4.0	11.0	1.9	0.0	4.0	11.0	1.9	0.0	6.0	11.0	2.54	0.0	6.0	11.0	2.54	0.0	4.0	11.0	1.9	0.0	4.0	11.0	1.9	0.0	4.0	11.0	1.9	0.0	4.0	11.0	1.9	0.0	6.0	11.0	2.54	0.0	4.0	11.0	1.9	0.0	6.0	11.0	2.54	0.0	4.0	11.0	1.9	0.0	6.0
1296	4.0	11.0	1.9	0.0	6.0	11.0	2.54	0.0	4.0	11.0	1.9	0.0	6.0	11.0	2.54	0.0	4.0	11.0	1.9	0.0	6.0	11.0	2.54	0.0	6.0	11.0	2.54	0.0	4.0	11.0	1.9	0.0	4.0	11.0	1.9	0.0	4.0	11.0	1.9	0.0	4.0	11.0	1.9	0.0	4.0	11.0	1.9	0.0	4.0
1297	6.0	11.0	2.54	0.0	4.0	11.0	1.9	0.0	4.0	11.0	1.9	0.0	6.0	11.0	2.54	0.0	6.0	11.0	2.54	0.0	4.0	11.0	1.9	0.0	4.0	11.0	1.9	0.0	4.0	11.0	1.9	0.0	4.0	11.0	1.9	0.0	4.0	11.0	1.9	0.0	4.0	11.0	1.9	0.0	4.0	11.0	1.9	0.0	4.0
1298	4.0	11.0	1.9	0.0	4.0	11.0	1.9	0.0	4.0	11.0	1.9	0.0	4.0	11.0	1.9	0.0	4.0	11.0	1.9	0.0	4.0	11.0	1.9	0.0	4.0	11.0	1.9	0.0	4.0	11.0	1.9	0.0	4.0	11.0	1.9	0.0	4.0	11.0	1.9	0.0	4.0	11.0	1.9	0.0	4.0	11.0	1.9	0.0	6.0
1299	4.0	11.0	1.9	0.0	4.0	11.0	1.9	0.0	4.0	11.0	1.9	0.0	4.0	11.0	1.9	0.0	6.0	11.0	2.54	0.0	4.0	11.0	1.9	0.0	4.0	11.0	1.9	0.0	4.0	11.0	1.9	0.0	6.0	11.0	2.54	0.0	6.0	11.0	2.54	0.0	4.0	11.0	1.9	0.0	6.0	11.0	2.54	0.0	4.0
1300	6.0	11.0	2.54	0.0	4.0	11.0	1.9	0.0	6.0	11.0	2.54	0.0	4.0	11.0	1.9	0.0	6.0	11.0	2.54	0.0	6.0	11.0	2.54	0.0	6.0	11.0	2.54	0.0	4.0	11.0	1.9	0.0	4.0	11.0	1.9	0.0	4.0	11.0	1.9	0.0	4.0	11.0	1.9	0.0	4.0	11.0	1.9	0.0	4.0
1301	6.0	11.0	2.54	0.0	4.0	11.0	1.9	0.0	4.0	11.0	1.9	0.0	4.0	11.0	1.9	0.0	4.0	11.0	1.9	0.0	4.0	11.0	1.9	0.0	4.0	11.0	1.9	0.0	4.0	11.0	1.9	0.0	6.0	11.0	2.54	0.0	6.0	11.0	2.54	0.0	4.0	11.0	1.9	0.0	4.0	11.0	1.9	0.0	4.0
1302	4.0	11.0	1.9	0.0	4.0	11.0	1.9	0.0	6.0	11.0	2.54	0.0	6.0	11.0	2.54	0.0	4.0	11.0	1.9	0.0	4.0	11.0	1.9	0.0	4.0	11.0	1.9	0.0	4.0	11.0	1.9	0.0	6.0	11.0	2.54	0.0	4.0	11.0	1.9	0.0	6.0	11.0	2.54	0.0	4.0	11.0	1.9	0.0	4.0
1303	4.0	11.0	1.9	0.0	6.0	11.0	2.54	0.0	4.0	11.0	1.9	0.0	4.0	11.0	1.9	0.0	6.0	11.0	2.54	0.0	4.0	11.0	1.9	0.0	6.0	11.0	2.54	0.0	4.0	11.0	1.9	0.0	4.0	11.0	1.9	0.0	4.0	11.0	1.9	0.0	4.0	11.0	1.9	0.0	4.0	11.0	1.9	0.0	4.0
1304	6.0	11.0	2.54	0.0	4.0	11.0	1.9	0.0	4.0	11.0	1.9	0.0	4.0	11.0	1.9	0.0	4.0	11.0	1.9	0.0	4.0	11.0	1.9	0.0	4.0	11.0	1.9	0.0	4.0	11.0	1.9	0.0	4.0	11.0	1.9	0.0	6.0	11.0	2.54	0.0	4.0	11.0	1.9	0.0	4.0	11.0	1.9	0.0	4.0
1305	4.0	11.0	1.9	0.0	6.0	11.0	2.54	0.0	4.0	11.0	1.9	0.0	6.0	11.0	2.54	0.0	4.0	11.0	1.9	0.0	6.0	11.0	2.54	0.0	4.0	11.0	1.9	0.0	4.0	11.0	1.9	0.0	6.0	11.0	2.54	0.0	4.0	11.0	1.9	0.0	4.0	11.0	1.9	0.0	4.0	11.0	1.9	0.0	4.0
1306	4.0	11.0	1.9	0.0	4.0	11.0	1.9	0.0	6.0	11.0	2.54	0.0	4.0	11.0	1.9	0.0	6.0	11.0	2.54	0.0	4.0	11.0	1.9	0.0	4.0	11.0	1.9	0.0	6.0	11.0	2.54	0.0	4.0	11.0	1.9	0.0	4.0	11.0	1.9	0.0	4.0	11.0	1.9	0.0	6.0	11.0	2.54	0.0	4.0
1307	6.0	11.0	2.54	0.0	6.0	11.0	2.54	0.0	4.0	11.0	1.9	0.0	4.0	11.0	1.9	0.0	4.0	11.0	1.9	0.0	4.0	11.0	1.9	0.0	4.0	11.0	1.9	0.0	6.0	11.0	2.54	0.0	6.0	11.0	2.54	0.0	4.0	11.0	1.9	0.0	4.0	11.0	1.9	0.0	6.0	11.0	2.54	0.0	4.0
1308	4.0	11.0	1.9	0.0	4.0	11.0	1.9	0.0	4.0	11.0	1.9	0.0	6.0	11.0	2.54	0.0	4.0	11.0	1.9	0.0	4.0	11.0	1.9	0.0	4.0	11.0	1.9	0.0	4.0	11.0	1.9	0.0	4.0	11.0	1.9	0.0	4.0	11.0	1.9	0.0	4.0	11.0	1.9	0.0	4.0	11.0	1.9	0.0	6.0
1309	4.0	11.0	1.9	0.0	4.0	11.0	1.9	0.0	6.0	11.0	2.54	0.0	6.0	11.0	2.54	0.0	4.0	11.0	1.9	0.0	4.0	11.0	1.9	0.0	4.0	11.0	1.9	0.0	4.0	11.0	1.9	0.0	4.0	11.0	1.9	0.0	4.0	11.0	1.9	0.0	4.0	11.0	1.9	0.0	4.0	11.0	1.9	0.0	6.0
1310	4.0	11.0	1.9	0.0	4.0	11.0	1.9	0.0	4.0	11.0	1.9	0.0	4.0	11.0	1.9	0.0	4.0	11.0	1.9	0.0	4.0	11.0	1.9	0.0	6.0	11.0	2.54	0.0	4.0	11.0	1.9	0.0	4.0	11.0	1.9	0.0	6.0	11.0	2.54	0.0	6.0	11.0	2.54	0.0	4.0	11.0	1.9	0.0	4.0
1311	4.0	11.0	1.9	0.0	4.0	11.0	1.9	0.0	6.0	11.0	2.54	0.0	4.0	11.0	1.9	0.0	4.0	11.0	1.9	0.0	4.0	11.0	1.9	0.0	4.0	11.0	1.9	0.0	6.0	11.0	2.54	0.0	4.0	11.0	1.9	0.0	4.0	11.0	1.9	0.0	4.0	11.0	1.9	0.0	4.0	11.0	1.9	0.0	4.0
1312	4.0	11.0	1.9	0.0	4.0	11.0	1.9	0.0	4.0	11.0	1.9	0.0	4.0	11.0	1.9	0.0	4.0	11.0	1.9	0.0	4.0	11.0	1.9	0.0	4.0	11.0	1.9	0.0	6.0	11.0	2.54	0.0	4.0	11.0	1.9	0.0	4.0	11.0	1.9	0.0	4.0	11.0	1.9	0.0	4.0	11.0	1.9	0.0	6.0
1313	4.0	11.0	1.9	0.0	4.0	11.0	1.9	0.0	4.0	11.0	1.9	0.0	6.0	11.0	2.54	0.0	4.0	11.0	1.9	0.0	4.0	11.0	1.9	0.0	6.0	11.0	2.54	0.0	4.0	11.0	1.9	0.0	4.0	11.0	1.9	0.0	4.0	11.0	1.9	0.0	4.0	11.0	1.9	0.0	6.0	11.0	2.54	0.0	4.0
1314	4.0	11.0	1.9	0.0	4.0	11.0	1.9	0.0	4.0	11.0	1.9	0.0	4.0	11.0	1.9	0.0	4.0	11.0	1.9	0.0	4.0	11.0	1.9	0.0	4.0	11.0	1.9	0.0	4.0	11.0	1.9	0.0	4.0	11.0	1.9	0.0	4.0	11.0	1.9	0.0	4.0	11.0	1.9	0.0	6.0	11.0	2.54	0.0	6.0
1315	6.0	11.0	2.54	0.0	6.0	11.0	2.54	0.0	6.0	11.0	2.54	0.0	4.0	11.0	1.9	0.0	6.0	11.0	2.54	0.0	4.0	11.0	1.9	0.0	4.0	11.0	1.9	0.0	4.0	11.0	1.9	0.0	4.0	11.0	1.9	0.0	4.0	11.0	1.9	0.0	4.0	11.0	1.9	0.0	4.0	11.0	1.9	0.0	4.0
1316	6.0	11.0	2.54	0.0	6.0	11.0	2.54	0.0	4.0	11.0	1.9	0.0	4.0	11.0	1.9	0.0	4.0	11.0	1.9	0.0	4.0	11.0	1.9	0.0	4.0	11.0	1.9	0.0	4.0	11.0	1.9	0.0	4.0	11.0	1.9	0.0	6.0	11.0	2.54	0.0	4.0	11.0	1.9	0.0	6.0	11.0	2.54	0.0	4.0
1317	4.0	11.0	1.9	0.0	4.0	11.0	1.9	0.0	4.0	11.0	1.9	0.0	4.0	11.0	1.9	0.0	4.0	11.0	1.9	0.0	4.0	11.0	1.9	0.0	4.0	11.0	1.9	0.0	4.0	11.0	1.9	0.0	4.0	11.0	1.9	0.0	6.0	11.0	2.54	0.0	4.0	11.0	1.9	0.0	6.0	11.0	2.54	0.0	6.0
1318	4.0	11.0	1.9	0.0	4.0	11.0	1.9	0.0	4.0	11.0	1.9	0.0	4.0	11.0	1.9	0.0	4.0	11.0	1.9	0.0	6.0	11.0	2.54	0.0	4.0	11.0	1.9	0.0	4.0	11.0	1.9	0.0	4.0	11.0	1.9	0.0	4.0	11.0	1.9	0.0	4.0	11.0	1.9	0.0	4.0	11.0	1.9	0.0	6.0
1319	4.0	11.0	1.9	0.0	6.0	11.0	2.54	0.0	4.0	11.0	1.9	0.0	4.0	11.0	1.9	0.0	4.0	11.0	1.9	0.0	4.0	11.0	1.9	0.0	4.0	11.0	1.9	0.0	4.0	11.0	1.9	0.0	4.0	11.0	1.9	0.0	4.0	11.0	1.9	0.0	4.0	11.0	1.9	0.0	4.0	11.0	1.9	0.0	6.0
1320	4.0	11.0	1.9	0.0	4.0	11.0	1.9	0.0	6.0	11.0	2.54	0.0	4.0	11.0	1.9	0.0	6.0	11.0	2.54	0.0	4.0	11.0	1.9	0.0	4.0	11.0	1.9	0.0	4.0	11.0	1.9	0.0	4.0	11.0	1.9	0.0	4.0	11.0	1.9	0.0	6.0	11.0	2.54	0.0	4.0	11.0	1.9	0.0	4.0
1321	4.0	11.0	1.9	0.0	4.0	11.0	1.9	0.0	4.0	11.0	1.9	0.0	4.0	11.0	1.9	0.0	4.0	11.0	1.9	0.0	4.0	11.0	1.9	0.0	6.0	11.0	2.54	0.0	4.0	11.0	1.9	0.0	4.0	11.0	1.9	0.0	6.0	11.0	2.54	0.0	4.0	11.0	1.9	0.0	4.0	11.0	1.9	0.0	4.0
1322	4.0	11.0	1.9	0.0	6.0	11.0	2.54	0.0	4.0	11.0	1.9	0.0	6.0	11.0	2.54	0.0	4.0	11.0	1.9	0.0	4.0	11.0	1.9	0.0	6.0	11.0	2.54	0.0	4.0	11.0	1.9	0.0	4.0	11.0	1.9	0.0	6.0	11.0	2.54	0.0	4.0	11.0	1.9	0.0	4.0	11.0	1.9	0.0	4.0
1323	4.0	11.0	1.9	0.0	6.0	11.0	2.54	0.0	4.0	11.0	1.9	0.0	4.0	11.0	1.9	0.0	4.0	11.0	1.9	0.0	4.0	11.0	1.9	0.0	6.0	11.0	2.54	0.0	4.0	11.0	1.9	0.0	4.0	11.0	1.9	0.0	4.0	11.0	1.9	0.0	4.0	11.0	1.9	0.0	6.0	11.0	2.54	0.0	4.0
1324	4.0	11.0	1.9	0.0	4.0	11.0	1.9	0.0	4.0	11.0	1.9	0.0	4.0	11.0	1.9	0.0	4.0	11.0	1.9	0.0	6.0	11.0	2.54	0.0	4.0	11.0	1.9	0.0	6.0	11.0	2.54	0.0	4.0	11.0	1.9	0.0	6.0	11.0	2.54	0.0	6.0	11.0	2.54	0.0	4.0	11.0	1.9	0.0	6.0
1325	4.0	11.0	1.9	0.0	4.0	11.0	1.9	0.0	4.0	11.0	1.9	0.0	4.0	11.0	1.9	0.0	6.0	11.0	2.54	0.0	4.0	11.0	1.9	0.0	4.0	11.0	1.9	0.0	4.0	11.0	1.9	0.0	6.0	11.0	2.54	0.0	4.0	11.0	1.9	0.0	6.0	11.0	2.54	0.0	4.0	11.0	1.9	0.0	6.0
1326	4.0	11.0	1.9	0.0	6.0	11.0	2.54	0.0	6.0	11.0	2.54	0.0	4.0	11.0	1.9	0.0	6.0	11.0	2.54	0.0	4.0	11.0	1.9	0.0	4.0	11.0	1.9	0.0	4.0	11.0	1.9	0.0	4.0	11.0	1.9	0.0	4.0	11.0	1.9	0.0	6.0	11.0	2.54	0.0	4.0	11.0	1.9	0.0	4.0
1327	4.0	11.0	1.9	0.0	4.0	11.0	1.9	0.0	4.0	11.0	1.9	0.0	4.0	11.0	1.9	0.0	6.0	11.0	2.54	0.0	4.0	11.0	1.9	0.0	6.0	11.0	2.54	0.0	6.0	11.0	2.54	0.0	4.0	11.0	1.9	0.0	4.0	11.0	1.9	0.0	4.0	11.0	1.9	0.0	4.0	11.0	1.9	0.0	6.0
1328	4.0	11.0	1.9	0.0	6.0	11.0	2.54	0.0	6.0	11.0	2.54	0.0	4.0	11.0	1.9	0.0	4.0	11.0	1.9	0.0	4.0	11.0	1.9	0.0	4.0	11.0	1.9	0.0	6.0	11.0	2.54	0.0	4.0	11.0	1.9	0.0	4.0	11.0	1.9	0.0	4.0	11.0	1.9	0.0	4.0	11.0	1.9	0.0	4.0
1329	4.0	11.0	1.9	0.0	6.0	11.0	2.54	0.0	4.0	11.0	1.9	0.0	4.0	11.0	1.9	0.0	4.0	11.0	1.9	0.0	6.0	11.0	2.54	0.0	6.0	11.0	2.54	0.0	4.0	11.0	1.9	0.0	4.0	11.0	1.9	0.0	4.0	11.0	1.9	0.0	4.0	11.0	1.9	0.0	4.0	11.0	1.9	0.0	6.0
1330	4.0	11.0	1.9	0.0	4.0	11.0	1.9	0.0	4.0	11.0	1.9	0.0	6.0	11.0	2.54	0.0	4.0	11.0	1.9	0.0	4.0	11.0	1.9	0.0	4.0	11.0	1.9	0.0	4.0	11.0	1.9	0.0	6.0	11.0	2.54	0.0	4.0	11.0	1.9	0.0	4.0	11.0	1.9	0.0	6.0	11.0	2.54	0.0	4.0
1331	4.0	11.0	1.9	0.0	4.0	11.0	1.9	0.0	4.0	11.0	1.9	0.0	6.0	11.0	2.54	0.0	6.0	11.0	2.54	0.0	4.0	11.0	1.9	0.0	6.0	11.0	2.54	0.0	4.0	11.0	1.9	0.0	4.0	11.0	1.9	0.0	4.0	11.0	1.9	0.0	4.0	11.0	1.9	0.0	4.0	11.0	1.9	0.0	4.0
1332	4.0	11.0	1.9	0.0	4.0	11.0	1.9	0.0	4.0	11.0	1.9	0.0	4.0	11.0	1.9	0.0	4.0	11.0	1.9	0.0	6.0	11.0	2.54	0.0	6.0	11.0	2.54	0.0	4.0	11.0	1.9	0.0	4.0	11.0	1.9	0.0	6.0	11.0	2.54	0.0	4.0	11.0	1.9	0.0	4.0	11.0	1.9	0.0	4.0
1333	6.0	11.0	2.54	0.0	4.0	11.0	1.9	0.0	4.0	11.0	1.9	0.0	6.0	11.0	2.54	0.0	4.0	11.0	1.9	0.0	4.0	11.0	1.9	0.0	4.0	11.0	1.9	0.0	4.0	11.0	1.9	0.0	4.0	11.0	1.9	0.0	4.0	11.0	1.9	0.0	4.0	11.0	1.9	0.0	4.0	11.0	1.9	0.0	4.0
1334	4.0	11.0	1.9	0.0	4.0	11.0	1.9	0.0	4.0	11.0	1.9	0.0	4.0	11.0	1.9	0.0	4.0	11.0	1.9	0.0	6.0	11.0	2.54	0.0	4.0	11.0	1.9	0.0	4.0	11.0	1.9	0.0	4.0	11.0	1.9	0.0	4.0	11.0	1.9	0.0	6.0	11.0	2.54	0.0	4.0	11.0	1.9	0.0	4.0
1335	4.0	11.0	1.9	0.0	4.0	11.0	1.9	0.0	4.0	11.0	1.9	0.0	4.0	11.0	1.9	0.0	4.0	11.0	1.9	0.0	4.0	11.0	1.9	0.0	6.0	11.0	2.54	0.0	4.0	11.0	1.9	0.0	4.0	11.0	1.9	0.0	4.0	11.0	1.9	0.0	6.0	11.0	2.54	0.0	4.0	11.0	1.9	0.0	4.0
1336	4.0	11.0	1.9	0.0	4.0	11.0	1.9	0.0	6.0	11.0	2.54	0.0	4.0	11.0	1.9	0.0	6.0	11.0	2.54	0.0	4.0	11.0	1.9	0.0	6.0	11.0	2.54	0.0	4.0	11.0	1.9	0.0	6.0	11.0	2.54	0.0	4.0	11.0	1.9	0.0	6.0	11.0	2.54	0.0	4.0	11.0	1.9	0.0	4.0
1337	6.0	11.0	2.54	0.0	4.0	11.0	1.9	0.0	6.0	11.0	2.54	0.0	4.0	11.0	1.9	0.0	4.0	11.0	1.9	0.0	4.0	11.0	1.9	0.0	4.0	11.0	1.9	0.0	4.0	11.0	1.9	0.0	4.0	11.0	1.9	0.0	4.0	11.0	1.9	0.0	4.0	11.0	1.9	0.0	4.0	11.0	1.9	0.0	6.0
1338	6.0	11.0	2.54	0.0	6.0	11.0	2.54	0.0	4.0	11.0	1.9	0.0	4.0	11.0	1.9	0.0	4.0	11.0	1.9	0.0	4.0	11.0	1.9	0.0	4.0	11.0	1.9	0.0	4.0	11.0	1.9	0.0	4.0	11.0	1.9	0.0	4.0	11.0	1.9	0.0	6.0	11.0	2.54	0.0	4.0	11.0	1.9	0.0	4.0
1339	4.0	11.0	1.9	0.0	4.0	11.0	1.9	0.0	4.0	11.0	1.9	0.0	4.0	11.0	1.9	0.0	6.0	11.0	2.54	0.0	4.0	11.0	1.9	0.0	6.0	11.0	2.54	0.0	6.0	11.0	2.54	0.0	4.0	11.0	1.9	0.0	4.0	11.0	1.9	0.0	4.0	11.0	1.9	0.0	4.0	11.0	1.9	0.0	4.0
1340	4.0	11.0	1.9	0.0	6.0	11.0	2.54	0.0	4.0	11.0	1.9	0.0	4.0	11.0	1.9	0.0	4.0	11.0	1.9	0.0	6.0	11.0	2.54	0.0	4.0	11.0	1.9	0.0	4.0	11.0	1.9	0.0	4.0	11.0	1.9	0.0	4.0	11.0	1.9	0.0	4.0	11.0	1.9	0.0	6.0	11.0	2.54	0.0	4.0
1341	6.0	11.0	2.54	0.0	4.0	11.0	1.9	0.0	4.0	11.0	1.9	0.0	4.0	11.0	1.9	0.0	4.0	11.0	1.9	0.0	4.0	11.0	1.9	0.0	4.0	11.0	1.9	0.0	4.0	11.0	1.9	0.0	4.0	11.0	1.9	0.0	4.0	11.0	1.9	0.0	4.0	11.0	1.9	0.0	6.0	11.0	2.54	0.0	6.0
1342	6.0	11.0	2.54	0.0	6.0	11.0	2.54	0.0	4.0	11.0	1.9	0.0	6.0	11.0	2.54	0.0	4.0	11.0	1.9	0.0	4.0	11.0	1.9	0.0	4.0	11.0	1.9	0.0	4.0	11.0	1.9	0.0	4.0	11.0	1.9	0.0	4.0	11.0	1.9	0.0	4.0	11.0	1.9	0.0	4.0	11.0	1.9	0.0	4.0
1343	6.0	11.0	2.54	0.0	6.0	11.0	2.54	0.0	4.0	11.0	1.9	0.0	6.0	11.0	2.54	0.0	4.0	11.0	1.9	0.0	6.0	11.0	2.54	0.0	4.0	11.0	1.9	0.0	4.0	11.0	1.9	0.0	6.0	11.0	2.54	0.0	4.0	11.0	1.9	0.0	4.0	11.0	1.9	0.0	4.0	11.0	1.9	0.0	6.0
1344	4.0	11.0	1.9	0.0	4.0	11.0	1.9	0.0	4.0	11.0	1.9	0.0	4.0	11.0	1.9	0.0	6.0	11.0	2.54	0.0	6.0	11.0	2.54	0.0	4.0	11.0	1.9	0.0	4.0	11.0	1.9	0.0	4.0	11.0	1.9	0.0	4.0	11.0	1.9	0.0	6.0	11.0	2.54	0.0	4.0	11.0	1.9	0.0	4.0
1345	4.0	11.0	1.9	0.0	4.0	11.0	1.9	0.0	4.0	11.0	1.9	0.0	4.0	11.0	1.9	0.0	4.0	11.0	1.9	0.0	4.0	11.0	1.9	0.0	4.0	11.0	1.9	0.0	4.0	11.0	1.9	0.0	6.0	11.0	2.54	0.0	4.0	11.0	1.9	0.0	4.0	11.0	1.9	0.0	4.0	11.0	1.9	0.0	6.0
1346	6.0	11.0	2.54	0.0	6.0	11.0	2.54	0.0	4.0	11.0	1.9	0.0	6.0	11.0	2.54	0.0	4.0	11.0	1.9	0.0	4.0	11.0	1.9	0.0	4.0	11.0	1.9	0.0	4.0	11.0	1.9	0.0	6.0	11.0	2.54	0.0	4.0	11.0	1.9	0.0	4.0	11.0	1.9	0.0	4.0	11.0	1.9	0.0	4.0
1347	6.0	11.0	2.54	0.0	4.0	11.0	1.9	0.0	4.0	11.0	1.9	0.0	4.0	11.0	1.9	0.0	4.0	11.0	1.9	0.0	4.0	11.0	1.9	0.0	4.0	11.0	1.9	0.0	4.0	11.0	1.9	0.0	4.0	11.0	1.9	0.0	6.0	11.0	2.54	0.0	4.0	11.0	1.9	0.0	4.0	11.0	1.9	0.0	6.0
1348	4.0	11.0	1.9	0.0	6.0	11.0	2.54	0.0	4.0	11.0	1.9	0.0	6.0	11.0	2.54	0.0	4.0	11.0	1.9	0.0	4.0	11.0	1.9	0.0	4.0	11.0	1.9	0.0	4.0	11.0	1.9	0.0	4.0	11.0	1.9	0.0	4.0	11.0	1.9	0.0	4.0	11.0	1.9	0.0	6.0	11.0	2.54	0.0	4.0
1349	4.0	11.0	1.9	0.0	4.0	11.0	1.9	0.0	4.0	11.0	1.9	0.0	4.0	11.0	1.9	0.0	4.0	11.0	1.9	0.0	4.0	11.0	1.9	0.0	4.0	11.0	1.9	0.0	6.0	11.0	2.54	0.0	4.0	11.0	1.9	0.0	6.0	11.0	2.54	0.0	4.0	11.0	1.9	0.0	4.0	11.0	1.9	0.0	4.0
1350	4.0	11.0	1.9	0.0	4.0	11.0	1.9	0.0	4.0	11.0	1.9	0.0	6.0	11.0	2.54	0.0	6.0	11.0	2.54	0.0	4.0	11.0	1.9	0.0	4.0	11.0	1.9	0.0	4.0	11.0	1.9	0.0	6.0	11.0	2.54	0.0	4.0	11.0	1.9	0.0	4.0	11.0	1.9	0.0	4.0	11.0	1.9	0.0	4.0
1351	4.0	11.0	1.9	0.0	4.0	11.0	1.9	0.0	4.0	11.0	1.9	0.0	6.0	11.0	2.54	0.0	4.0	11.0	1.9	0.0	4.0	11.0	1.9	0.0	4.0	11.0	1.9	0.0	6.0	11.0	2.54	0.0	4.0	11.0	1.9	0.0	4.0	11.0	1.9	0.0	4.0	11.0	1.9	0.0	4.0	11.0	1.9	0.0	6.0
1352	4.0	11.0	1.9	0.0	6.0	11.0	2.54	0.0	6.0	11.0	2.54	0.0	4.0	11.0	1.9	0.0	6.0	11.0	2.54	0.0	4.0	11.0	1.9	0.0	4.0	11.0	1.9	0.0	6.0	11.0	2.54	0.0	4.0	11.0	1.9	0.0	4.0	11.0	1.9	0.0	6.0	11.0	2.54	0.0	4.0	11.0	1.9	0.0	4.0
1353	4.0	11.0	1.9	0.0	4.0	11.0	1.9	0.0	4.0	11.0	1.9	0.0	4.0	11.0	1.9	0.0	6.0	11.0	2.54	0.0	6.0	11.0	2.54	0.0	6.0	11.0	2.54	0.0	4.0	11.0	1.9	0.0	4.0	11.0	1.9	0.0	6.0	11.0	2.54	0.0	6.0	11.0	2.54	0.0	4.0	11.0	1.9	0.0	4.0
1354	4.0	11.0	1.9	0.0	4.0	11.0	1.9	0.0	4.0	11.0	1.9	0.0	6.0	11.0	2.54	0.0	4.0	11.0	1.9	0.0	6.0	11.0	2.54	0.0	4.0	11.0	1.9	0.0	6.0	11.0	2.54	0.0	4.0	11.0	1.9	0.0	6.0	11.0	2.54	0.0	4.0	11.0	1.9	0.0	4.0	11.0	1.9	0.0	4.0
1355	4.0	11.0	1.9	0.0	6.0	11.0	2.54	0.0	4.0	11.0	1.9	0.0	4.0	11.0	1.9	0.0	4.0	11.0	1.9	0.0	6.0	11.0	2.54	0.0	4.0	11.0	1.9	0.0	4.0	11.0	1.9	0.0	4.0	11.0	1.9	0.0	4.0	11.0	1.9	0.0	6.0	11.0	2.54	0.0	4.0	11.0	1.9	0.0	6.0
1356	6.0	11.0	2.54	0.0	4.0	11.0	1.9	0.0	4.0	11.0	1.9	0.0	4.0	11.0	1.9	0.0	4.0	11.0	1.9	0.0	4.0	11.0	1.9	0.0	6.0	11.0	2.54	0.0	4.0	11.0	1.9	0.0	4.0	11.0	1.9	0.0	4.0	11.0	1.9	0.0	4.0	11.0	1.9	0.0	6.0	11.0	2.54	0.0	4.0
1357	6.0	11.0	2.54	0.0	4.0	11.0	1.9	0.0	4.0	11.0	1.9	0.0	6.0	11.0	2.54	0.0	4.0	11.0	1.9	0.0	4.0	11.0	1.9	0.0	4.0	11.0	1.9	0.0	4.0	11.0	1.9	0.0	6.0	11.0	2.54	0.0	4.0	11.0	1.9	0.0	4.0	11.0	1.9	0.0	4.0	11.0	1.9	0.0	4.0
1358	4.0	11.0	1.9	0.0	4.0	11.0	1.9	0.0	4.0	11.0	1.9	0.0	4.0	11.0	1.9	0.0	4.0	11.0	1.9	0.0	6.0	11.0	2.54	0.0	4.0	11.0	1.9	0.0	6.0	11.0	2.54	0.0	4.0	11.0	1.9	0.0	4.0	11.0	1.9	0.0	4.0	11.0	1.9	0.0	4.0	11.0	1.9	0.0	4.0
1359	6.0	11.0	2.54	0.0	4.0	11.0	1.9	0.0	4.0	11.0	1.9	0.0	4.0	11.0	1.9	0.0	4.0	11.0	1.9	0.0	4.0	11.0	1.9	0.0	4.0	11.0	1.9	0.0	4.0	11.0	1.9	0.0	4.0	11.0	1.9	0.0	4.0	11.0	1.9	0.0	4.0	11.0	1.9	0.0	6.0	11.0	2.54	0.0	4.0
1360	4.0	11.0	1.9	0.0	4.0	11.0	1.9	0.0	4.0	11.0	1.9	0.0	4.0	11.0	1.9	0.0	6.0	11.0	2.54	0.0	4.0	11.0	1.9	0.0	4.0	11.0	1.9	0.0	4.0	11.0	1.9	0.0	4.0	11.0	1.9	0.0	6.0	11.0	2.54	0.0	4.0	11.0	1.9	0.0	4.0	11.0	1.9	0.0	4.0
1361	4.0	11.0	1.9	0.0	6.0	11.0	2.54	0.0	6.0	11.0	2.54	0.0	4.0	11.0	1.9	0.0	4.0	11.0	1.9	0.0	4.0	11.0	1.9	0.0	6.0	11.0	2.54	0.0	4.0	11.0	1.9	0.0	4.0	11.0	1.9	0.0	6.0	11.0	2.54	0.0	4.0	11.0	1.9	0.0	4.0	11.0	1.9	0.0	4.0
1362	4.0	11.0	1.9	0.0	4.0	11.0	1.9	0.0	4.0	11.0	1.9	0.0	4.0	11.0	1.9	0.0	6.0	11.0	2.54	0.0	4.0	11.0	1.9	0.0	6.0	11.0	2.54	0.0	6.0	11.0	2.54	0.0	4.0	11.0	1.9	0.0	6.0	11.0	2.54	0.0	4.0	11.0	1.9	0.0	4.0	11.0	1.9	0.0	4.0
1363	4.0	11.0	1.9	0.0	4.0	11.0	1.9	0.0	4.0	11.0	1.9	0.0	4.0	11.0	1.9	0.0	4.0	11.0	1.9	0.0	6.0	11.0	2.54	0.0	6.0	11.0	2.54	0.0	4.0	11.0	1.9	0.0	6.0	11.0	2.54	0.0	4.0	11.0	1.9	0.0	4.0	11.0	1.9	0.0	6.0	11.0	2.54	0.0	4.0
1364	6.0	11.0	2.54	0.0	4.0	11.0	1.9	0.0	4.0	11.0	1.9	0.0	4.0	11.0	1.9	0.0	4.0	11.0	1.9	0.0	4.0	11.0	1.9	0.0	6.0	11.0	2.54	0.0	4.0	11.0	1.9	0.0	4.0	11.0	1.9	0.0	4.0	11.0	1.9	0.0	6.0	11.0	2.54	0.0	4.0	11.0	1.9	0.0	6.0
1365	4.0	11.0	1.9	0.0	4.0	11.0	1.9	0.0	4.0	11.0	1.9	0.0	4.0	11.0	1.9	0.0	4.0	11.0	1.9	0.0	4.0	11.0	1.9	0.0	4.0	11.0	1.9	0.0	6.0	11.0	2.54	0.0	4.0	11.0	1.9	0.0	6.0	11.0	2.54	0.0	4.0	11.0	1.9	0.0	4.0	11.0	1.9	0.0	6.0
1366	4.0	11.0	1.9	0.0	4.0	11.0	1.9	0.0	6.0	11.0	2.54	0.0	4.0	11.0	1.9	0.0	4.0	11.0	1.9	0.0	6.0	11.0	2.54	0.0	4.0	11.0	1.9	0.0	4.0	11.0	1.9	0.0	4.0	11.0	1.9	0.0	4.0	11.0	1.9	0.0	4.0	11.0	1.9	0.0	4.0	11.0	1.9	0.0	4.0
1367	4.0	11.0	1.9	0.0	4.0	11.0	1.9	0.0	4.0	11.0	1.9	0.0	4.0	11.0	1.9	0.0	4.0	11.0	1.9	0.0	6.0	11.0	2.54	0.0	4.0	11.0	1.9	0.0	4.0	11.0	1.9	0.0	4.0	11.0	1.9	0.0	4.0	11.0	1.9	0.0	4.0	11.0	1.9	0.0	6.0	11.0	2.54	0.0	4.0
1368	6.0	11.0	2.54	0.0	6.0	11.0	2.54	0.0	4.0	11.0	1.9	0.0	4.0	11.0	1.9	0.0	6.0	11.0	2.54	0.0	4.0	11.0	1.9	0.0	4.0	11.0	1.9	0.0	6.0	11.0	2.54	0.0	4.0	11.0	1.9	0.0	4.0	11.0	1.9	0.0	6.0	11.0	2.54	0.0	4.0	11.0	1.9	0.0	4.0
1369	6.0	11.0	2.54	0.0	4.0	11.0	1.9	0.0	4.0	11.0	1.9	0.0	6.0	11.0	2.54	0.0	4.0	11.0	1.9	0.0	4.0	11.0	1.9	0.0	4.0	11.0	1.9	0.0	4.0	11.0	1.9	0.0	4.0	11.0	1.9	0.0	4.0	11.0	1.9	0.0	4.0	11.0	1.9	0.0	6.0	11.0	2.54	0.0	4.0
1370	6.0	11.0	2.54	0.0	6.0	11.0	2.54	0.0	6.0	11.0	2.54	0.0	6.0	11.0	2.54	0.0	4.0	11.0	1.9	0.0	6.0	11.0	2.54	0.0	4.0	11.0	1.9	0.0	4.0	11.0	1.9	0.0	4.0	11.0	1.9	0.0	4.0	11.0	1.9	0.0	6.0	11.0	2.54	0.0	4.0	11.0	1.9	0.0	4.0
1371	4.0	11.0	1.9	0.0	4.0	11.0	1.9	0.0	4.0	11.0	1.9	0.0	6.0	11.0	2.54	0.0	6.0	11.0	2.54	0.0	4.0	11.0	1.9	0.0	4.0	11.0	1.9	0.0	6.0	11.0	2.54	0.0	4.0	11.0	1.9	0.0	4.0	11.0	1.9	0.0	4.0	11.0	1.9	0.0	4.0	11.0	1.9	0.0	4.0
1372	4.0	11.0	1.9	0.0	4.0	11.0	1.9	0.0	6.0	11.0	2.54	0.0	4.0	11.0	1.9	0.0	4.0	11.0	1.9	0.0	6.0	11.0	2.54	0.0	4.0	11.0	1.9	0.0	4.0	11.0	1.9	0.0	6.0	11.0	2.54	0.0	4.0	11.0	1.9	0.0	4.0	11.0	1.9	0.0	4.0	11.0	1.9	0.0	4.0
1373	4.0	11.0	1.9	0.0	4.0	11.0	1.9	0.0	4.0	11.0	1.9	0.0	4.0	11.0	1.9	0.0	4.0	11.0	1.9	0.0	6.0	11.0	2.54	0.0	6.0	11.0	2.54	0.0	4.0	11.0	1.9	0.0	4.0	11.0	1.9	0.0	4.0	11.0	1.9	0.0	4.0	11.0	1.9	0.0	4.0	11.0	1.9	0.0	4.0
1374	4.0	11.0	1.9	0.0	4.0	11.0	1.9	0.0	6.0	11.0	2.54	0.0	4.0	11.0	1.9	0.0	4.0	11.0	1.9	0.0	4.0	11.0	1.9	0.0	6.0	11.0	2.54	0.0	4.0	11.0	1.9	0.0	6.0	11.0	2.54	0.0	6.0	11.0	2.54	0.0	6.0	11.0	2.54	0.0	4.0	11.0	1.9	0.0	4.0
1375	4.0	11.0	1.9	0.0	6.0	11.0	2.54	0.0	6.0	11.0	2.54	0.0	6.0	11.0	2.54	0.0	6.0	11.0	2.54	0.0	4.0	11.0	1.9	0.0	4.0	11.0	1.9	0.0	4.0	11.0	1.9	0.0	4.0	11.0	1.9	0.0	6.0	11.0	2.54	0.0	4.0	11.0	1.9	0.0	4.0	11.0	1.9	0.0	4.0
1376	4.0	11.0	1.9	0.0	4.0	11.0	1.9	0.0	4.0	11.0	1.9	0.0	4.0	11.0	1.9	0.0	4.0	11.0	1.9	0.0	4.0	11.0	1.9	0.0	4.0	11.0	1.9	0.0	4.0	11.0	1.9	0.0	4.0	11.0	1.9	0.0	4.0	11.0	1.9	0.0	6.0	11.0	2.54	0.0	6.0	11.0	2.54	0.0	4.0
1377	4.0	11.0	1.9	0.0	6.0	11.0	2.54	0.0	4.0	11.0	1.9	0.0	4.0	11.0	1.9	0.0	6.0	11.0	2.54	0.0	4.0	11.0	1.9	0.0	4.0	11.0	1.9	0.0	4.0	11.0	1.9	0.0	4.0	11.0	1.9	0.0	4.0	11.0	1.9	0.0	4.0	11.0	1.9	0.0	6.0	11.0	2.54	0.0	6.0
1378	4.0	11.0	1.9	0.0	4.0	11.0	1.9	0.0	4.0	11.0	1.9	0.0	4.0	11.0	1.9	0.0	6.0	11.0	2.54	0.0	4.0	11.0	1.9	0.0	4.0	11.0	1.9	0.0	4.0	11.0	1.9	0.0	4.0	11.0	1.9	0.0	6.0	11.0	2.54	0.0	6.0	11.0	2.54	0.0	4.0	11.0	1.9	0.0	4.0
1379	4.0	11.0	1.9	0.0	6.0	11.0	2.54	0.0	4.0	11.0	1.9	0.0	6.0	11.0	2.54	0.0	4.0	11.0	1.9	0.0	4.0	11.0	1.9	0.0	4.0	11.0	1.9	0.0	4.0	11.0	1.9	0.0	4.0	11.0	1.9	0.0	4.0	11.0	1.9	0.0	4.0	11.0	1.9	0.0	4.0	11.0	1.9	0.0	4.0
1380	4.0	11.0	1.9	0.0	4.0	11.0	1.9	0.0	6.0	11.0	2.54	0.0	4.0	11.0	1.9	0.0	6.0	11.0	2.54	0.0	4.0	11.0	1.9	0.0	6.0	11.0	2.54	0.0	4.0	11.0	1.9	0.0	4.0	11.0	1.9	0.0	6.0	11.0	2.54	0.0	4.0	11.0	1.9	0.0	4.0	11.0	1.9	0.0	4.0
1381	4.0	11.0	1.9	0.0	6.0	11.0	2.54	0.0	4.0	11.0	1.9	0.0	4.0	11.0	1.9	0.0	4.0	11.0	1.9	0.0	4.0	11.0	1.9	0.0	4.0	11.0	1.9	0.0	4.0	11.0	1.9	0.0	4.0	11.0	1.9	0.0	4.0	11.0	1.9	0.0	6.0	11.0	2.54	0.0	4.0	11.0	1.9	0.0	4.0
1382	4.0	11.0	1.9	0.0	6.0	11.0	2.54	0.0	4.0	11.0	1.9	0.0	4.0	11.0	1.9	0.0	4.0	11.0	1.9	0.0	4.0	11.0	1.9	0.0	4.0	11.0	1.9	0.0	4.0	11.0	1.9	0.0	6.0	11.0	2.54	0.0	4.0	11.0	1.9	0.0	4.0	11.0	1.9	0.0	6.0	11.0	2.54	0.0	4.0
1383	4.0	11.0	1.9	0.0	4.0	11.0	1.9	0.0	4.0	11.0	1.9	0.0	4.0	11.0	1.9	0.0	4.0	11.0	1.9	0.0	6.0	11.0	2.54	0.0	6.0	11.0	2.54	0.0	4.0	11.0	1.9	0.0	4.0	11.0	1.9	0.0	6.0	11.0	2.54	0.0	4.0	11.0	1.9	0.0	4.0	11.0	1.9	0.0	6.0
1384	4.0	11.0	1.9	0.0	4.0	11.0	1.9	0.0	4.0	11.0	1.9	0.0	4.0	11.0	1.9	0.0	6.0	11.0	2.54	0.0	4.0	11.0	1.9	0.0	4.0	11.0	1.9	0.0	4.0	11.0	1.9	0.0	4.0	11.0	1.9	0.0	4.0	11.0	1.9	0.0	6.0	11.0	2.54	0.0	4.0	11.0	1.9	0.0	6.0
1385	4.0	11.0	1.9	0.0	4.0	11.0	1.9	0.0	6.0	11.0	2.54	0.0	4.0	11.0	1.9	0.0	4.0	11.0	1.9	0.0	4.0	11.0	1.9	0.0	4.0	11.0	1.9	0.0	6.0	11.0	2.54	0.0	6.0	11.0	2.54	0.0	6.0	11.0	2.54	0.0	4.0	11.0	1.9	0.0	4.0	11.0	1.9	0.0	4.0
1386	4.0	11.0	1.9	0.0	4.0	11.0	1.9	0.0	6.0	11.0	2.54	0.0	4.0	11.0	1.9	0.0	4.0	11.0	1.9	0.0	4.0	11.0	1.9	0.0	4.0	11.0	1.9	0.0	6.0	11.0	2.54	0.0	4.0	11.0	1.9	0.0	4.0	11.0	1.9	0.0	6.0	11.0	2.54	0.0	4.0	11.0	1.9	0.0	6.0
1387	4.0	11.0	1.9	0.0	6.0	11.0	2.54	0.0	6.0	11.0	2.54	0.0	4.0	11.0	1.9	0.0	4.0	11.0	1.9	0.0	4.0	11.0	1.9	0.0	6.0	11.0	2.54	0.0	4.0	11.0	1.9	0.0	4.0	11.0	1.9	0.0	4.0	11.0	1.9	0.0	4.0	11.0	1.9	0.0	4.0	11.0	1.9	0.0	6.0
[truncated: 4 more columns]
