# Supplementary material for: Machine learning assisted binary alloy catalyst design for the electroreduction of CO2 to C2 products
Source: Royal Society of Chemistry journal article supplement (doi:10.1039/d2ya00316c), 2023-01-01
Supplement: d2ya00316c3.pdf [file d2ya00316c3.pdf]

**Supplementary Materials for**  
**Machine Learning Assisted Binary Alloy Catalyst Design for the**  
**Electroreduction of CO<sub>2</sub> to C<sub>2</sub> Products**

Zachary Gariepy<sup>1</sup>, Guiyi Chen<sup>1</sup>, Anni Xu<sup>1</sup>, Zhuole Lu<sup>1</sup>, Zhi Wen Chen<sup>1\*</sup>, Chandra Veer  
Singh<sup>1,2\*</sup>

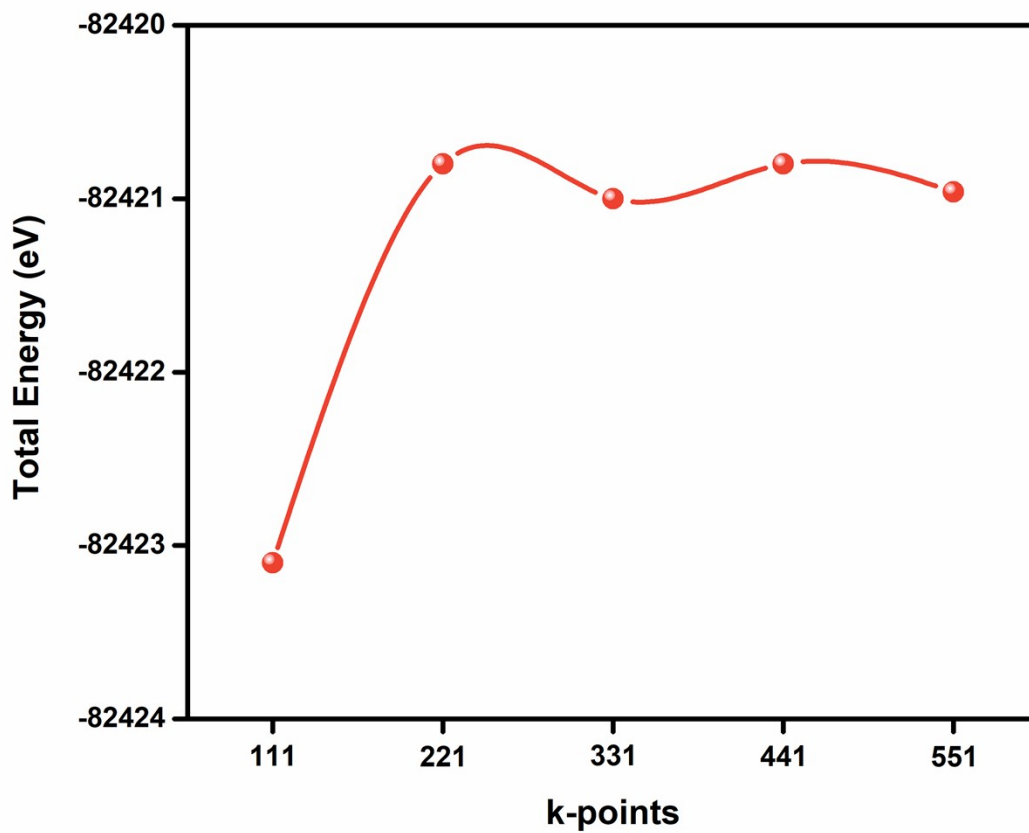

**Figure S1.** KPOINTS convergence test ranging from 1x1x1 gamma centered k-points mesh up to 5x5x1 k-points mesh.

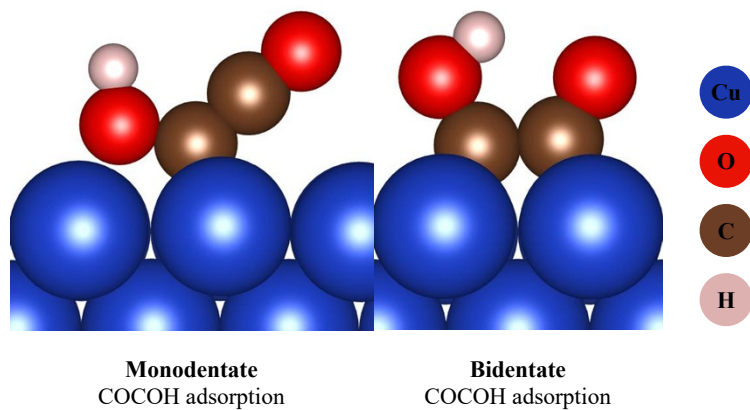

**Figure S2.** Visualization of 2 possible COCO<sub>2</sub>H adsorption configurations on a Cu (100) surface. The monodentate adsorption favors a single bridge site adsorption whereas the bidentate adsorption favors dual bridge site adsorption.

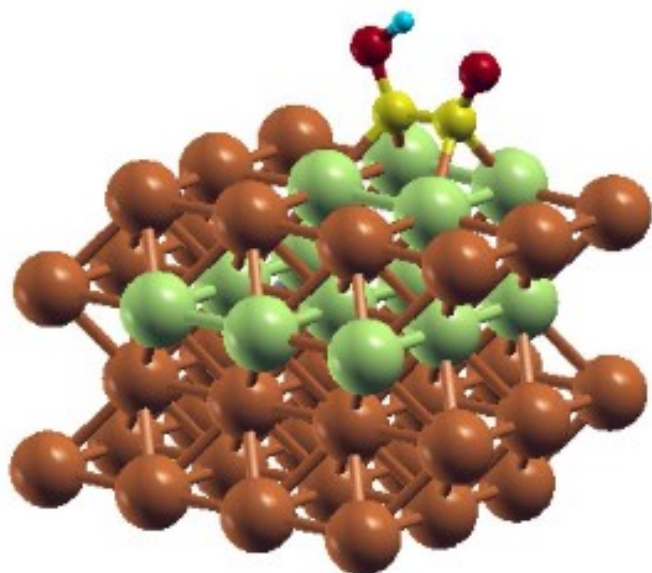

**Figure S3.** Visualization of 13 atoms in top two layers that influence adsorption properties the most (Green: 13 selected positions Brown: Copper Purple: Platinum Yellow: Carbon Red: Oxygen Blue: Hydrogen)

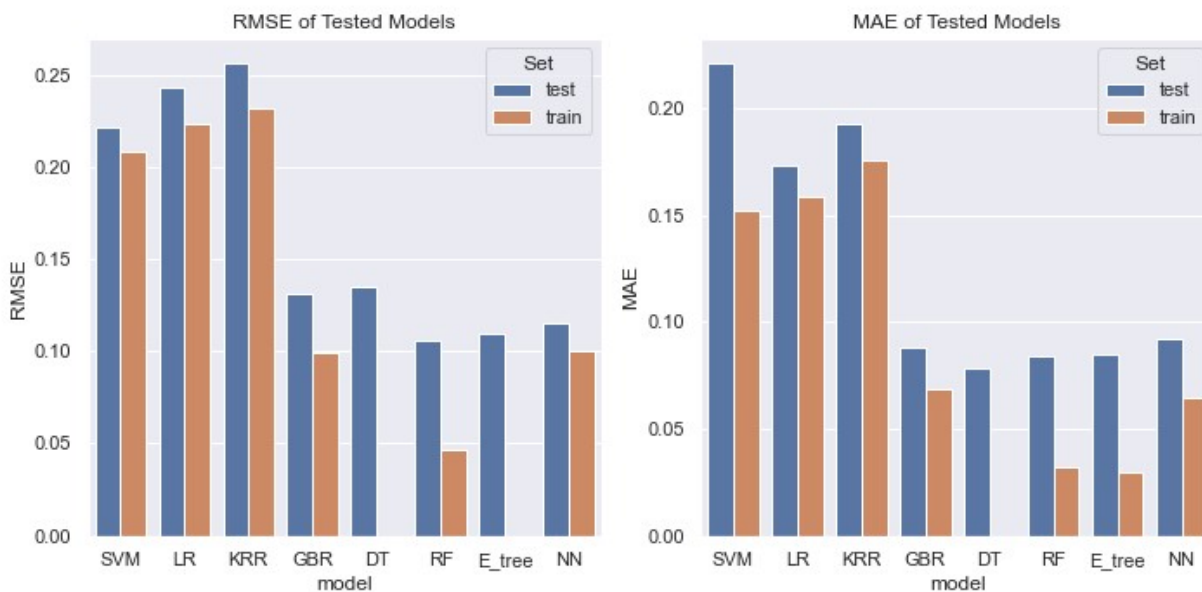

**Figure S4.** Comparison of the Root mean square error and mean absolute error of 8 commonly used regression models for electrocatalyst adsorption energy modeling.

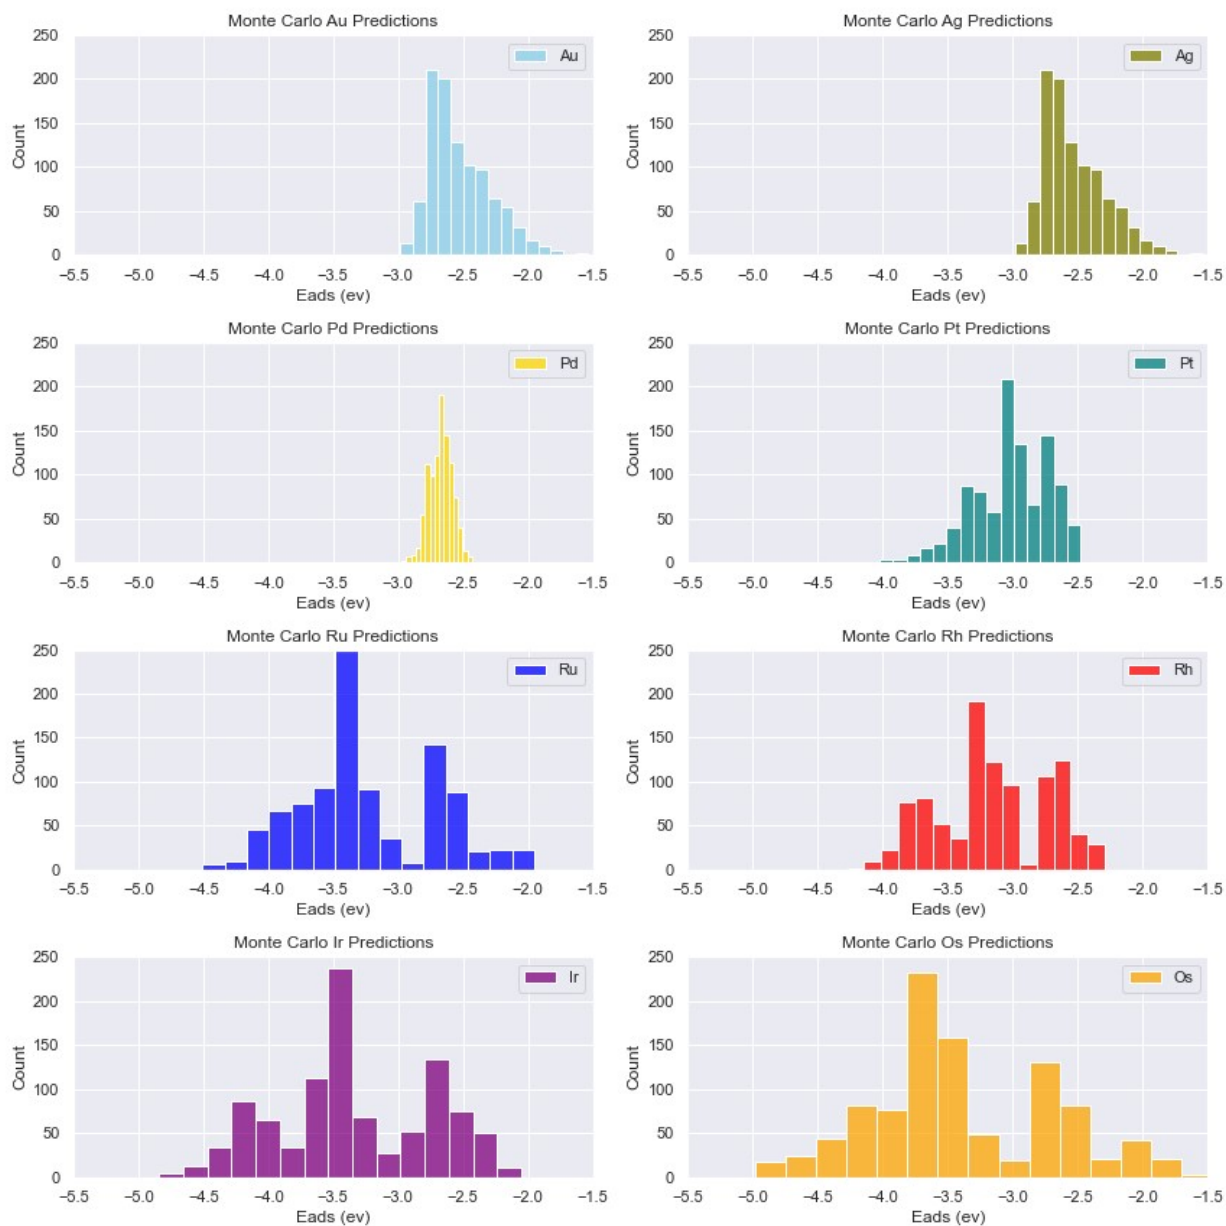

**Figure S5.** Eads distribution of 8 SAC elemental combinations. Each histogram contains the Eads of 1000 randomly generated surface structures predicted by a multilayer perceptron NN.

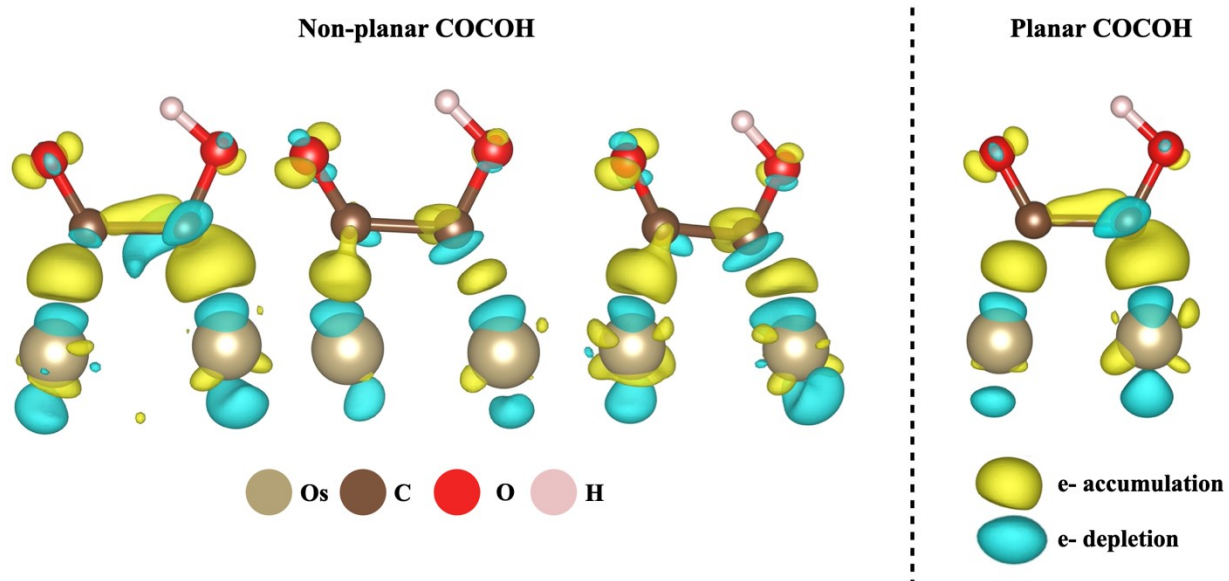

**Figure S6.** a,b,c) Charge Density Difference of 3 nonplanar COCOH adsorbates at low, medium, high adsorption energies. d) Typical planar COCOH adsorbate at medium adsorption energy.

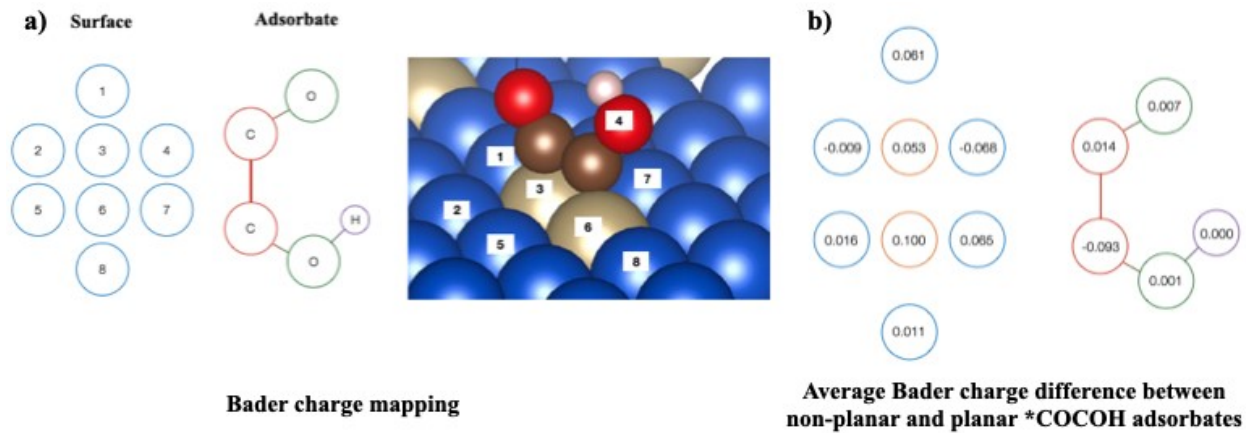

**Figure S7.** a) Bader charge mapping of substrate and adsorbate. b) average Bader charge difference between 3 non-planar COCOH datapoints and a reference planar COCOH adsorbate.



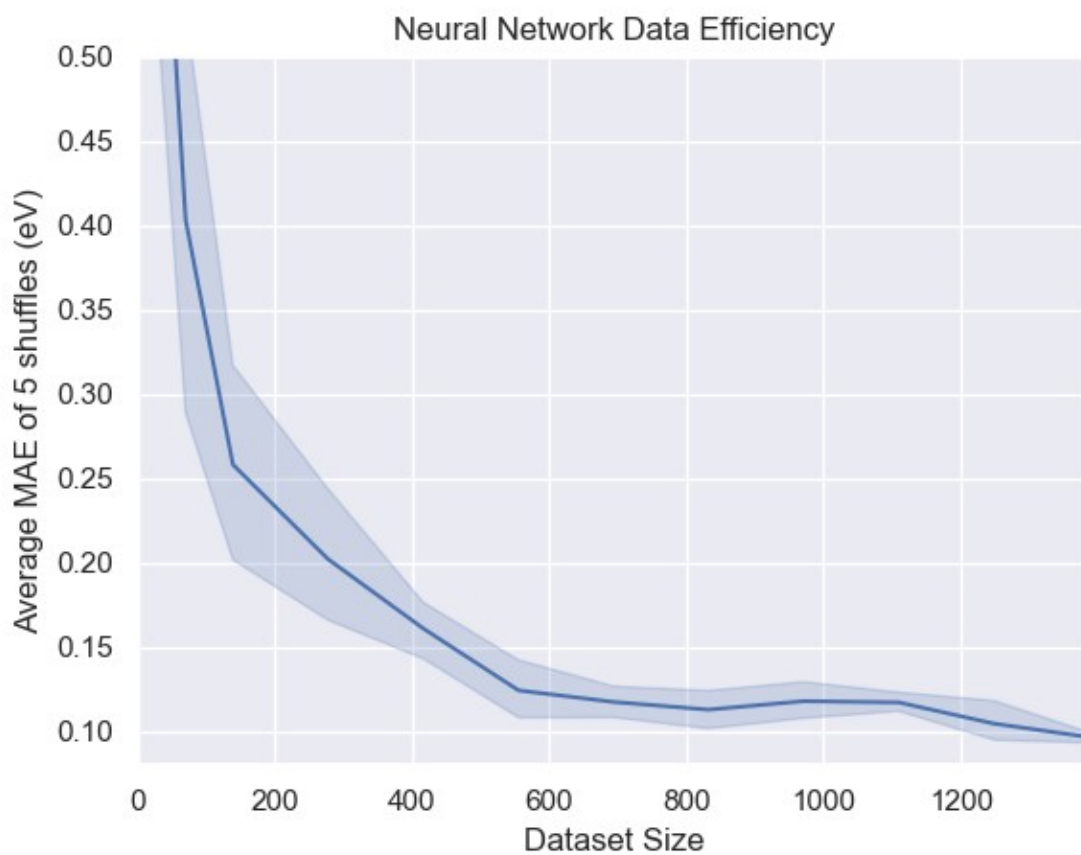

**Figure S8.** Data efficiency of the Neural Network model. The y axis is the average MAE value of 5 dataset reshuffles in eV with uncertainties visible and the x axis is the dataset size used to train the model.
